# Supplementary material for: Social Processing in the Amygdala: Single-Nucleus RNA-Sequencing Reveals Distinct Neuronal Responses to Dominant and Subordinate Cues
Source: Research Square preprint supplement (doi:10.21203/rs.3.rs-8564517/v1), 2026-02-10
Supplement: Supplementary file 2 [file 1839a8e9d4e28943e5d22093.xlsx]

## Sheet: Table_S3_cell_type_markers
gene	p_val	avg_log2FC	pct.1	pct.2	p_val_adj	cell_type
Tafa1	0	2.3325517616045808	0.748	0.311	0	Glutamatergic neurons
Ptprd	0	1.817971244020102	0.996	0.799	0	Glutamatergic neurons
Slit3	0	1.8137447270313498	0.884	0.337	0	Glutamatergic neurons
Gm49678	0	1.4441725580523377	0.503	0.107	0	Glutamatergic neurons
Car10	0	1.4380714663171945	0.904	0.444	0	Glutamatergic neurons
Dpp10	0	1.4318639130028132	0.911	0.685	0	Glutamatergic neurons
Hs3st4	0	1.2970381560943396	0.622	0.268	0	Glutamatergic neurons
Arpp21	0	1.2671809408629153	0.978	0.656	0	Glutamatergic neurons
Sv2b	0	1.2043481343857527	0.73	0.248	0	Glutamatergic neurons
Rgs6	0	1.183821980133294	0.652	0.289	0	Glutamatergic neurons
Celf2	0	1.1526601024374816	0.995	0.871	0	Glutamatergic neurons
Gm42303	0	1.150510930653303	0.664	0.173	0	Glutamatergic neurons
Nrg3	0	1.14184	0.996	0.757	0	Glutamatergic neurons
6530403H02Rik	0	1.1152836349286877	0.495	0.154	0	Glutamatergic neurons
Nalf1	0	1.1111117002125437	0.992	0.727	0	Glutamatergic neurons
Csmd1	0	1.0884645385378056	0.994	0.816	0	Glutamatergic neurons
Cntn4	0	1.0802287888166382	0.866	0.524	0	Glutamatergic neurons
Nrg3os	0	1.062697255737611	0.973	0.587	0	Glutamatergic neurons
Pigk	0	1.0608192818174496	0.813	0.495	0	Glutamatergic neurons
Gm20642	0	1.0593260733152965	0.972	0.583	0	Glutamatergic neurons
Kcnma1	0	1.0574456304460877	0.968	0.725	0	Glutamatergic neurons
Cacna2d1	0	1.0255844363752324	0.921	0.487	0	Glutamatergic neurons
Grin2a	0	1.0247565132208667	0.93	0.578	0	Glutamatergic neurons
Gm34544	7.358101984327674e-153	1.3318416430758078	0.193	0.078	2.4793860446390532e-148	Glutamatergic neurons
Flt1	0	4.374587729151525	0.701	0.015	0	Endothelial cells
Slco1a4	0	3.8486686181205068	0.639	0.006	0	Endothelial cells
Ebf1	0	3.0709227306144826	0.691	0.063	0	Endothelial cells
Adgrl4	0	3.0671942210077456	0.545	0.008	0	Endothelial cells
Hmcn1	0	2.923179039204283	0.503	0.026	0	Endothelial cells
Mecom	0	2.8822291063092544	0.49	0.009	0	Endothelial cells
Cxcl12	0	2.875949885715312	0.5	0.021	0	Endothelial cells
Abcg2	0	2.6055742015215055	0.549	0.051	0	Endothelial cells
Slc6a20a	0	2.4656657855141173	0.347	0.016	0	Endothelial cells
Nostrin	0	2.3540430494870765	0.458	0.009	0	Endothelial cells
Lef1	0	2.2775182156334646	0.441	0.007	0	Endothelial cells
Klf2	0	2.249433053516169	0.434	0.016	0	Endothelial cells
Rbpms	0	2.0261142991982144	0.486	0.012	0	Endothelial cells
Pdgfd	0	1.9540155114495588	0.396	0.018	0	Endothelial cells
Abcb1a	0	1.9482198033540898	0.368	0.01	0	Endothelial cells
Rgs5	0	1.896453356233837	0.34	0.01	0	Endothelial cells
Cyyr1	0	1.841429796314308	0.333	0.004	0	Endothelial cells
Adgrf5	0	1.7377014449122334	0.354	0.006	0	Endothelial cells
Slc38a11	0	1.7065540716264738	0.24	0.004	0	Endothelial cells
Itga1	0	1.6638231339786023	0.337	0.013	0	Endothelial cells
Emcn	0	1.6590537674660024	0.306	0.01	0	Endothelial cells
Zfp366	0	1.657256211184478	0.288	0.003	0	Endothelial cells
Clec2d	0	1.6426237528522902	0.323	0.006	0	Endothelial cells
Id1	0	1.635117116363416	0.316	0.014	0	Endothelial cells
Prom1	0	1.6164474566191045	0.306	0.007	0	Endothelial cells
Ahnak	0	1.6148367963399388	0.337	0.008	0	Endothelial cells
Eng	0	1.5952262315341126	0.333	0.007	0	Endothelial cells
Tns1	0	1.5593505673697103	0.385	0.021	0	Endothelial cells
Cldn5	0	1.5579306246554474	0.316	0.011	0	Endothelial cells
Slc6a13	0	1.5191167571924977	0.174	0.002	0	Endothelial cells
Paqr5	0	1.482208009439814	0.281	0.011	0	Endothelial cells
Slc22a8	0	1.4596280788664562	0.285	0.004	0	Endothelial cells
Fzd6	0	1.432209585485927	0.278	0.003	0	Endothelial cells
Tbx3os1	0	1.2853924504902212	0.198	0.002	0	Endothelial cells
Abcc9	0	1.0910244465394516	0.153	0.001	0	Endothelial cells
Sp100	0	1.0138957517220037	0.184	0.003	0	Endothelial cells
Epas1	7.402063795457167e-294	2.2445026787563287	0.5	0.044	2.4941994165172473e-289	Endothelial cells
Ptprb	4.4923849271369936e-282	2.166155600325456	0.413	0.031	1.5137540250480813e-277	Endothelial cells
Fn1	7.884901845977867e-276	1.4801686059480785	0.25	0.01	2.6568965260207023e-271	Endothelial cells
Slc2a1	7.199493207842389e-272	2.2050530942087776	0.441	0.036	2.425941231314571e-267	Endothelial cells
Gm20631	1.5610353217587839e-263	1.565093867783247	0.281	0.014	5.260064620198398e-259	Endothelial cells
Itih5	1.2086898312919042e-259	1.858042764180456	0.361	0.025	4.0728012555212003e-255	Endothelial cells
Cped1	5.048582993243832e-258	2.671096950298623	0.41	0.033	1.7011705254034416e-253	Endothelial cells
Igfbp7	1.9736603876991513e-256	2.090946620286542	0.458	0.042	6.65044604239106e-252	Endothelial cells
Adgre5	3.89711329477853e-253	1.2124945701359777	0.229	0.009	1.3131712958085735e-248	Endothelial cells
Anxa3	5.811375357861268e-252	1.0892637727827237	0.212	0.008	1.9582010405849328e-247	Endothelial cells
Lamc3	1.2300072694661257e-249	1.0363807371835365	0.184	0.006	4.144632495193057e-245	Endothelial cells
Adap2	6.203571269117909e-247	1.51889	0.264	0.013	2.090355374841971e-242	Endothelial cells
Adap2os	4.253027154710581e-236	1.5352329399984042	0.264	0.014	1.4331000300512775e-231	Endothelial cells
Fli1	1.542158644836547e-235	1.52911	0.292	0.017	5.196457769641228e-231	Endothelial cells
Vtn	4.364074154032729e-230	1.8838855985351588	0.316	0.021	1.4705184269428684e-225	Endothelial cells
Ushbp1	1.175664499668092e-226	1.1297457281656187	0.212	0.009	3.9615190980816026e-222	Endothelial cells
Ccdc141	1.5923278295101107e-226	2.7599796567852333	0.552	0.072	5.365507854317269e-222	Endothelial cells
Apcdd1	6.916815290158612e-225	1.3574323453204042	0.271	0.016	2.330690080171846e-220	Endothelial cells
Egflam	5.792404650002208e-222	1.1072702511691626	0.208	0.009	1.951808670864744e-217	Endothelial cells
Heg1	8.534283499687254e-220	1.8783473825743058	0.42	0.041	2.875712168054617e-215	Endothelial cells
Gjc1	1.503211865147131e-215	1.1570411404823662	0.205	0.009	5.065222700799773e-211	Endothelial cells
Pltp	8.35565278957018e-212	1.8186179706511267	0.365	0.031	2.815520763973568e-207	Endothelial cells
Clic5	5.4063085586990214e-210	1.1810049178013755	0.198	0.009	1.8217097319392223e-205	Endothelial cells
Cgnl1	1.1484980601046587e-198	1.084202013077144	0.212	0.011	3.869979063328658e-194	Endothelial cells
Xdh	1.480411004269186e-198	1.4438173022949616	0.288	0.02	4.988392919985449e-194	Endothelial cells
Slco1c1	2.2089823253898203e-187	2.4938236668051355	0.531	0.076	7.443386843633538e-183	Endothelial cells
Acer2	2.6002770090786946e-185	1.5520547260658126	0.292	0.023	8.76189340979157e-181	Endothelial cells
Cfh	2.0400489330660366e-183	1.3719145328596785	0.219	0.012	6.874148884859317e-179	Endothelial cells
Hspb1	9.218583028405985e-182	1.3048973480780004	0.281	0.021	3.1062937372516805e-177	Endothelial cells
Atp10a	6.413815381784747e-181	2.47406	0.521	0.08	2.161199231046188e-176	Endothelial cells
Pdgfrb	5.40667061476323e-178	1.7126496704160137	0.299	0.025	1.8218317303506178e-173	Endothelial cells
Egfl7	3.0341315759752184e-177	2.227132685915757	0.486	0.069	1.0223809758406096e-172	Endothelial cells
Pecam1	6.707737335955863e-172	1.2454194398715515	0.247	0.017	2.2602391727236876e-167	Endothelial cells
Arhgap31	9.022777964068544e-171	2.2813427026672572	0.549	0.092	3.0403152627725365e-166	Endothelial cells
Slc7a5	7.229572214887291e-160	1.7119687346309251	0.337	0.036	2.436076653528422e-155	Endothelial cells
Hspa12b	4.71205468884626e-156	1.3560635383771213	0.281	0.025	1.5877739479536358e-151	Endothelial cells
Uaca	9.909049649686567e-153	1.008442231972206	0.222	0.016	3.338953369958385e-148	Endothelial cells
Tbc1d4	3.048855586223631e-147	2.190961759498122	0.483	0.082	1.0273423783339148e-142	Endothelial cells
Ly6c1	3.996802413171052e-147	1.7109352214729547	0.34	0.039	1.3467625411421177e-142	Endothelial cells
Fgd5	3.4418947531753405e-143	1.1308267925224862	0.198	0.013	1.1597808560299627e-138	Endothelial cells
Lrrk1	1.2013683003520893e-139	1.195224634223018	0.253	0.022	4.0481306248664e-135	Endothelial cells
Slc16a12	8.316899111983974e-138	1.19319	0.208	0.015	2.80246232477412e-133	Endothelial cells
Rasgrp3	6.930532123980452e-132	1.135654816058436	0.226	0.019	2.335312104496453e-127	Endothelial cells
Dock6	7.075680958258872e-124	1.3436892915615184	0.267	0.028	2.3842214556949094e-119	Endothelial cells
Morrbid	1.635000228710593e-123	1.0042990204137658	0.156	0.009	5.509296770663215e-119	Endothelial cells
Itm2a	1.2421232945876792e-117	1.1680951904614216	0.226	0.021	4.185458653442644e-113	Endothelial cells
Ly6a	5.477039384983535e-112	1.1200826263941281	0.194	0.016	1.8455431911640518e-107	Endothelial cells
Phldb2	2.1483197099814734e-111	1.2704771607087166	0.285	0.035	7.238978094753573e-107	Endothelial cells
Ramp2	3.585190979717203e-111	1.3687960649310598	0.312	0.043	1.2080659525255087e-106	Endothelial cells
Abcc4	5.5255558360868746e-111	1.6712119469390272	0.368	0.06	1.8618912945278332e-106	Endothelial cells
Atp13a5	7.215148007179614e-111	2.5752790657966966	0.281	0.035	2.4312162724992426e-106	Endothelial cells
Kank3	7.893862726078231e-102	1.7712595801383288	0.385	0.072	2.659915984179321e-97	Endothelial cells
Svil	3.4368660575374394e-101	1.580203537281802	0.399	0.074	1.1580863867478156e-96	Endothelial cells
Jcad	4.411687062804605e-97	1.5480444461990903	0.351	0.062	1.4865620726826398e-92	Endothelial cells
Wwtr1	6.010201063741797e-97	1.1422005018704169	0.26	0.033	2.025197350438436e-92	Endothelial cells
Sema3c	1.9508976308233796e-88	2.0283005525105957	0.389	0.083	6.57374465682246e-84	Endothelial cells
Ndrg1	4.655336247488139e-87	1.2847796791904704	0.267	0.039	1.5686621019536032e-82	Endothelial cells
Igf1r	4.913512436935795e-87	2.7840110614415368	0.757	0.429	1.6556571507498853e-82	Endothelial cells
Cobll1	2.982927081143709e-86	1.457875911327522	0.319	0.055	1.0051271092621842e-81	Endothelial cells
Utrn	3.9889891043623735e-86	2.042420497297361	0.684	0.291	1.3441297686059454e-81	Endothelial cells
Dnah3	3.608074180369948e-85	1.3128779167286087	0.236	0.032	1.2157766758174576e-80	Endothelial cells
Id3	5.2860147801045215e-84	1.0020145301013006	0.233	0.03	1.7811755403040196e-79	Endothelial cells
Rbms1	9.783943719823835e-84	1.8567982988059355	0.559	0.183	3.296797675831839e-79	Endothelial cells
Stard13	2.116198756679316e-81	1.6702064251059838	0.51	0.145	7.130743330506623e-77	Endothelial cells
Prkch	4.9087419285766164e-79	1.1294071949760442	0.24	0.034	1.6540496802531767e-74	Endothelial cells
Zbtb20	2.2495100856680784e-76	1.489	0.903	0.597	7.579949184667157e-72	Endothelial cells
S1pr1	6.618171779145329e-76	1.3980573841655237	0.299	0.054	2.23005916270081e-71	Endothelial cells
Plekhg1	7.387837552573332e-75	1.3460495646655122	0.382	0.084	2.4894057417151102e-70	Endothelial cells
Gpcpd1	1.1014821061587406e-73	2.366889223911338	0.622	0.275	3.7115541049124924e-69	Endothelial cells
Selenop	4.785741480692735e-72	1.4504371828680713	0.344	0.073	1.612603449334224e-67	Endothelial cells
Nherf2	8.707273648718976e-72	1.1781923270150672	0.247	0.04	2.9340029286723463e-67	Endothelial cells
9530026P05Rik	1.9224990837492988e-70	1.9276469520035149	0.597	0.235	6.478052912601638e-66	Endothelial cells
Slc7a1	3.0843049592799246e-67	1.9784964709442407	0.344	0.081	1.0392873990789634e-62	Endothelial cells
Myo1e	9.068029084161017e-67	1.2724350369593989	0.264	0.047	3.0555630801988964e-62	Endothelial cells
Ets1	1.9675114897486114e-66	1.473397408932073	0.316	0.068	6.629726715856921e-62	Endothelial cells
Myo10	2.056328443214456e-65	1.4545601177334853	0.406	0.11	6.92900432225543e-61	Endothelial cells
St3gal6	1.6937830520958906e-62	1.5334008213660866	0.413	0.12	5.707371372342313e-58	Endothelial cells
Ccnd3	2.0084732068653816e-62	1.401933834030912	0.417	0.116	6.76775131785359e-58	Endothelial cells
Sgms1	8.923181919616244e-61	2.6909067285953183	0.688	0.454	3.0067553796338895e-56	Endothelial cells
Sptbn1	2.2576943604877495e-60	1.5532171407412179	0.812	0.739	7.607526917099521e-56	Endothelial cells
Dlc1	3.599518752058912e-59	2.4814197026616185	0.639	0.338	1.212893838693771e-54	Endothelial cells
Clic4	1.2249952310293889e-57	1.1535357822199286	0.264	0.053	4.1277439304766285e-53	Endothelial cells
Cp	2.711767029514231e-56	1.6624193952509272	0.347	0.094	9.137570182651154e-52	Endothelial cells
Lama1	2.0260008134322254e-55	1.6614035574987893	0.16	0.022	6.826812340941227e-51	Endothelial cells
Nfkbia	6.211801880043744e-53	1.012220523959008	0.233	0.045	2.09312876149954e-48	Endothelial cells
Gcnt2	8.938369424874292e-53	1.3701496849726091	0.309	0.079	3.0118729614056415e-48	Endothelial cells
Bmp6	6.932105912735264e-52	2.240224203405705	0.181	0.029	2.3358424083552744e-47	Endothelial cells
Ptprm	9.572925771062833e-52	1.702789720771653	0.601	0.282	3.2256930678173323e-47	Endothelial cells
Cald1	2.4294216031764548e-50	1.8886040715049899	0.455	0.176	8.186179034063381e-46	Endothelial cells
Tek	4.440758971502956e-50	1.1889048911563898	0.247	0.054	1.496358143037636e-45	Endothelial cells
Bsg	3.823227507877307e-48	1.7945891492275376	0.715	0.51	1.2882747410543373e-43	Endothelial cells
Rundc3b	2.353594993892731e-47	2.7400522585050036	0.608	0.39	7.930673691420945e-43	Endothelial cells
Rplp1	4.1215904313832798e-47	1.0873541579686847	0.896	0.812	1.38881111175891e-42	Endothelial cells
Gab1	5.020228266039514e-47	1.0051894523443874	0.323	0.087	1.6916161165246748e-42	Endothelial cells
Neat1	6.359775774530156e-47	1.1111074012824635	0.372	0.108	2.1429900449856814e-42	Endothelial cells
Atp1a2	1.7969641963119803e-46	2.0716845484035904	0.556	0.257	6.055050555892849e-42	Endothelial cells
Eogt	5.137472270361062e-46	1.1376054454555125	0.257	0.062	1.7311226562208635e-41	Endothelial cells
Lama2	1.5089794447676258e-44	1.3141063437850136	0.312	0.086	5.084657137088992e-40	Endothelial cells
Ddx5	8.235983413998143e-44	1.0159603339105523	0.878	0.865	2.7751969711808142e-39	Endothelial cells
Rgcc	9.611287810531762e-44	1.1801410171692337	0.292	0.079	3.238619540636783e-39	Endothelial cells
Golim4	9.906160426233182e-42	1.0192078877456725	0.222	0.05	3.337979817223533e-37	Endothelial cells
Myo1b	4.796523422554453e-41	1.509208644216106	0.378	0.14	1.6162365324639484e-36	Endothelial cells
Dcdc2a	5.038127782471487e-38	1.3178193302732328	0.177	0.036	1.697647537581592e-33	Endothelial cells
Colec12	1.525802973014924e-36	1.1162077038110034	0.854	0.867	5.141345697871088e-32	Endothelial cells
Kitl	5.283250681355314e-36	1.5649003657317557	0.406	0.172	1.7802441495894866e-31	Endothelial cells
Itpkb	6.564781912972218e-36	1.0110639629144673	0.243	0.065	2.2120689133951184e-31	Endothelial cells
Rai14	6.924411637223566e-36	1.0873000898519218	0.233	0.062	2.333249745278853e-31	Endothelial cells
Palmd	3.569088511659575e-35	1.463309414145138	0.361	0.141	1.2026400648888104e-30	Endothelial cells
Hip1	9.014970629807137e-35	1.6537626265158551	0.497	0.265	3.037684503419813e-30	Endothelial cells
Ptn	1.523110277663156e-32	1.214354306693137	0.708	0.57	5.132272391613771e-28	Endothelial cells
Sparc	5.685043294302224e-32	1.072629742724939	0.323	0.116	1.9156321884480776e-27	Endothelial cells
Spock2	4.508939582292163e-30	1.5683449525821485	0.628	0.503	1.5193322816491671e-25	Endothelial cells
Foxp1	8.33691764259117e-30	1.2318324255073647	0.708	0.616	2.809207768847521e-25	Endothelial cells
Zbtb16	6.812225837978085e-29	1.2095883337572984	0.545	0.332	2.2954476183650955e-24	Endothelial cells
Arl4a	1.9118798502590807e-28	1.2947985998382414	0.351	0.152	6.442270343432998e-24	Endothelial cells
Apod	2.4043488288351007e-28	2.0755974328479794	0.253	0.085	8.101693813642756e-24	Endothelial cells
Garre1	4.266203966221366e-28	1.4477005102101166	0.444	0.246	1.4375400884579512e-23	Endothelial cells
ENSMUSG00000121513	8.837326952791343e-28	1.6016741492337667	0.74	0.736	2.977825690012571e-23	Endothelial cells
Tjp1	1.6004871790417904e-27	1.1711002413455986	0.715	0.685	5.393001598499216e-23	Endothelial cells
Arhgap29	4.855054363413438e-27	1.221614201020405	0.451	0.249	1.635959118295792e-22	Endothelial cells
Pglyrp1	2.5535503121998792e-26	1.0066289130808281	0.212	0.065	8.604443131988714e-22	Endothelial cells
Slc39a10	5.518400788762522e-26	1.4033241216361318	0.479	0.29	1.8594803297814194e-21	Endothelial cells
Sema5a	2.3744559016939866e-25	1.3501899123818113	0.41	0.209	8.000966606348057e-21	Endothelial cells
Lima1	9.085777094699866e-24	1.0493710100860731	0.278	0.11	3.061543449830067e-19	Endothelial cells
Ranbp3l	3.030964684754745e-23	1.9886924236856203	0.139	0.034	1.021313860174959e-18	Endothelial cells
Ldlrad3	1.5435638604196618e-21	1.0777445724868748	0.285	0.123	5.2011927840700925e-17	Endothelial cells
Prex2	5.087899220501115e-19	1.058398871294449	0.403	0.224	1.7144185213400558e-14	Endothelial cells
Extl3	5.19546301953589e-19	1.0480973434338412	0.358	0.194	1.7506632190628134e-14	Endothelial cells
Serinc3	2.4878101975470387e-18	1.0061181004791582	0.347	0.187	8.382925241654502e-14	Endothelial cells
Plcb4	7.645988691129705e-18	1.0103263326110614	0.493	0.338	2.5763923493630653e-13	Endothelial cells
Tmtc4	9.755641458436729e-18	1.5577653636659772	0.292	0.145	3.28726094583484e-13	Endothelial cells
Bcl2l1	1.45255600671299e-17	1.123570188613949	0.41	0.25	4.894532720220091e-13	Endothelial cells
Fry	6.467576736128221e-17	1.0289246006553578	0.694	0.717	2.179314657005765e-12	Endothelial cells
Slc7a11	1.654495987262746e-16	1.262916942661612	0.142	0.044	5.574989678680549e-12	Endothelial cells
Fbxl7	2.836733189175072e-16	1.0395404960929724	0.351	0.197	9.558656154244322e-12	Endothelial cells
Luzp1	3.203598069102349e-16	1.1340329215754714	0.458	0.33	1.0794844053647276e-11	Endothelial cells
Ror1	3.233078269777161e-16	1.3371213544502272	0.215	0.089	1.0894180537841122e-11	Endothelial cells
Ly6e	6.497251099766455e-15	1.0969255632737296	0.281	0.145	2.1893137305773046e-10	Endothelial cells
Pitpnc1	3.054937322066282e-14	1.1234049519095284	0.521	0.421	1.0293916800434544e-9	Endothelial cells
Arhgap42	4.783477931665677e-14	1.0223667473664297	0.257	0.129	1.6118407238540665e-9	Endothelial cells
Rasal2	1.4303977271024455e-13	1.1073678725008618	0.615	0.605	4.8198681812444006e-9	Endothelial cells
Tfrc	3.7444572534937253e-13	1.101432170073455	0.306	0.181	1.2617323161372457e-8	Endothelial cells
Mcc	1.0088267245470439e-12	1.0712137489515752	0.375	0.247	3.3993425310337194e-8	Endothelial cells
Il34	2.51482665899622e-11	1.2089207742024277	0.274	0.162	8.473959910153663e-7	Endothelial cells
Tgfbr3	2.7757663454481487e-11	1.0665674405026873	0.299	0.185	9.353222277622082e-7	Endothelial cells
Pakap.1	4.022290393489456e-10	1.040703822488597	0.42	0.345	1.3553509709902072e-5	Endothelial cells
Insr	1.0715364939813746e-9	1.0572500396441398	0.413	0.332	3.61064937011964e-5	Endothelial cells
Plcl1	4.406366709052746e-9	1.019573238889905	0.503	0.451	1.4847693262824132e-4	Endothelial cells
Bicc1	4.787719258426025e-9	1.3157224339764144	0.312	0.216	1.6132698813192334e-4	Endothelial cells
Timp3	9.91505781454608e-9	1.0634459107245877	0.427	0.366	3.340977881189447e-4	Endothelial cells
Tmtc2	3.45752239759802e-8	1.2008518104068193	0.41	0.339	0.00116505	Endothelial cells
Slc12a2	1.1164645132443797e-7	1.0331692125149428	0.26	0.172	0.00376204	Endothelial cells
Slc38a2	2.1256923971467004e-7	1.1602651157731798	0.417	0.356	0.00716273	Endothelial cells
Ptgds	2.5695861070110175e-7	2.2483225422688706	0.524	0.511	0.00865848	Endothelial cells
Hbb-bs	9.76866513413588e-7	1.34588	0.319	0.24	0.0329165	Endothelial cells
Erbb4	0	2.4650062566051725	0.764	0.444	0	GABAergic neurons
Gm38505	0	2.2316734037949795	0.639	0.129	0	GABAergic neurons
Dlx6os1	0	2.0630533784934535	0.592	0.091	0	GABAergic neurons
Sox2ot	0	2.051458396616759	0.754	0.281	0	GABAergic neurons
Grip1	0	1.7941144758672345	0.925	0.627	0	GABAergic neurons
Nrxn3	0	1.6705979288957016	0.998	0.806	0	GABAergic neurons
Kcnc2	0	1.5242781710300173	0.632	0.318	0	GABAergic neurons
Foxp2	0	1.3761271508793742	0.291	0.103	0	GABAergic neurons
Robo1	0	1.3046299434379938	0.924	0.648	0	GABAergic neurons
Galntl6	0	1.2620067729390012	0.814	0.563	0	GABAergic neurons
Spock3	0	1.2378586707351864	0.785	0.404	0	GABAergic neurons
Alk	0	1.1783886407606317	0.418	0.143	0	GABAergic neurons
Cacna2d3	0	1.1437279721634432	0.759	0.519	0	GABAergic neurons
Ptprm	0	1.1239154855055178	0.481	0.2	0	GABAergic neurons
Gabrg3	0	1.0764781672684323	0.841	0.575	0	GABAergic neurons
8030451O07Rik	0	1.0683644260465222	0.499	0.145	0	GABAergic neurons
Cntnap2	0	1.0649082143038093	0.976	0.744	0	GABAergic neurons
Grip1os2	0	1.062185983035238	0.504	0.227	0	GABAergic neurons
Meis2	8.488752019208144e-308	1.3443148550807462	0.552	0.369	2.860369880392376e-303	GABAergic neurons
Kcnmb2	1.8849427666662155e-253	1.2945125882674464	0.302	0.132	6.35150314655848e-249	GABAergic neurons
Adarb2	3.6473110026494176e-231	1.646885231185553	0.516	0.329	1.2289979154527478e-226	GABAergic neurons
Nxph1	1.3010040306807422e-209	1.3618638373662233	0.44	0.266	4.383863181781829e-205	GABAergic neurons
Grik1	5.149263120350048e-206	1.0253132418146402	0.498	0.311	1.7350957010331524e-201	GABAergic neurons
Lhfpl3	0	2.4330579009985702	0.934	0.532	0	OPCs
Pdgfra	0	2.0485083232882255	0.463	0.022	0	OPCs
Gm4876	0	1.8503969640320057	0.523	0.119	0	OPCs
Dscam	0	1.831012090058787	0.968	0.632	0	OPCs
Arhgap31	0	1.7657423399705583	0.497	0.072	0	OPCs
Vcan	0	1.693021531215844	0.452	0.047	0	OPCs
Gpc5	0	1.650750248434477	0.776	0.326	0	OPCs
Sox6	0	1.6475407317913067	0.691	0.226	0	OPCs
Pcdh15	0	1.6218775595092736	0.914	0.603	0	OPCs
Megf11	0	1.6154	0.533	0.149	0	OPCs
Gm20713	0	1.5536910803035882	0.643	0.186	0	OPCs
Gm2164	0	1.5404524990016022	0.433	0.039	0	OPCs
Nxph1	0	1.523592063261062	0.761	0.291	0	OPCs
Gjc3	0	1.4925407220681959	0.43	0.047	0	OPCs
Bcas1	0	1.4015971413948929	0.369	0.06	0	OPCs
Gm56750	0	1.396413113355032	0.456	0.108	0	OPCs
Sox10	0	1.302874206569992	0.36	0.031	0	OPCs
6330576A10Rik	0	1.2700877660514118	0.402	0.089	0	OPCs
Emid1	0	1.2331041404299183	0.348	0.063	0	OPCs
Stk32a	0	1.2233345786948904	0.345	0.044	0	OPCs
Abtb2	0	1.1905889750505816	0.333	0.045	0	OPCs
Plpp4	0	1.1134063615408163	0.378	0.07	0	OPCs
Sema3d	0	1.1010902654004155	0.284	0.022	0	OPCs
C430049B03Rik	0	1.0521746641387164	0.223	0.007	0	OPCs
Kcnh8	2.705171735466198e-300	1.0441390015186494	0.293	0.047	9.115346679826901e-296	OPCs
Tnr	1.1748114396941242e-286	1.6558162656447322	0.921	0.695	3.958644627193321e-282	OPCs
Gm32509	5.772461484405198e-282	1.4750679488539478	0.863	0.51	1.9450886217851754e-277	OPCs
Epn2	2.654445689428452e-281	2.0058269798232082	0.75	0.415	8.944420195098112e-277	OPCs
Sh3d19	1.355168123757252e-233	1.3257348163517562	0.594	0.246	4.566374509812436e-229	OPCs
Gm42948	2.296350333891446e-228	1.103721746084057	0.354	0.089	7.7377820850806165e-224	OPCs
Xylt1	1.0102742381762255e-227	2.0472041388179196	0.733	0.465	3.4042200729586094e-223	OPCs
Zeb1	2.6003581491233486e-221	1.4718502757097995	0.832	0.557	8.762166819286036e-217	OPCs
Myt1	1.15801568265776e-216	1.1623077833559212	0.369	0.104	3.902049644283588e-212	OPCs
Kcnip1	1.3719972397044684e-212	1.0606375320045405	0.611	0.248	4.623081898908177e-208	OPCs
Slc35f1	1.554750473369233e-200	1.1780824595429822	0.861	0.615	5.238887195064968e-196	OPCs
Gm38505	1.5657821825372608e-188	1.1351351571950277	0.616	0.263	5.276059642277554e-184	OPCs
Ptprz1	6.11149494686652e-182	1.5331809748415623	0.756	0.51	2.0593293372961424e-177	OPCs
Maml2	2.614005510065823e-181	1.3750617916321373	0.614	0.303	8.808152966717796e-177	OPCs
Lrrc4c	7.047787455919124e-160	1.0581332353476651	0.935	0.844	2.374822461146508e-155	OPCs
Sox5	4.0195965692753694e-155	1.1017071665471216	0.678	0.378	1.3544432599830285e-150	OPCs
Cacng4	2.1397338465835658e-151	1.1509334701075993	0.393	0.148	7.210047169447984e-147	OPCs
Pcdh11x	1.204197655036203e-143	1.068029981047061	0.657	0.355	4.05766441840999e-139	OPCs
Ppfibp1	2.479811096636934e-141	1.062611558591862	0.429	0.18	8.3559714712278125e-137	OPCs
Usp24	5.034166702307742e-139	1.22244	0.584	0.333	1.6963128120096169e-134	OPCs
Nckap5	2.6403595997818814e-138	1.0109749017397036	0.672	0.4	8.896955707425028e-134	OPCs
Pid1	3.685961616401529e-137	1.06214	0.733	0.501	1.2420216262626592e-132	OPCs
Chst11	3.6350323049689443e-134	1.1778957253363291	0.541	0.284	1.2248604854823354e-129	OPCs
Sox2ot	3.4306849364473763e-133	1.0398447593323343	0.69	0.408	1.1560035961853078e-128	OPCs
Mir9-3hg	2.0977259400194977e-123	1.1869214757216158	0.582	0.347	7.0684973274897e-119	OPCs
St18	0	3.8266762805294148	0.86	0.039	0	Oligodendrocytes
Mbp	0	3.3580783417175972	0.949	0.337	0	Oligodendrocytes
Prr5l	0	3.270211766392521	0.763	0.014	0	Oligodendrocytes
Plcl1	0	3.258336340177433	0.959	0.423	0	Oligodendrocytes
Plp1	0	3.1508673303421135	0.887	0.255	0	Oligodendrocytes
Mobp	0	3.0456404118433054	0.753	0.082	0	Oligodendrocytes
Rnf220	0	3.0132062541880726	0.775	0.172	0	Oligodendrocytes
Pde4b	0	2.902890283459484	0.984	0.659	0	Oligodendrocytes
D7Ertd443e	0	2.8040918143960196	0.675	0.019	0	Oligodendrocytes
Pacrg	0	2.6686126145249025	0.836	0.369	0	Oligodendrocytes
Mast4	0	2.6148546896360236	0.926	0.565	0	Oligodendrocytes
Aspa	0	2.5808304434480545	0.641	0.022	0	Oligodendrocytes
Zfp536	0	2.4789392408778053	0.841	0.218	0	Oligodendrocytes
Slc24a2	0	2.4728486285216658	0.932	0.587	0	Oligodendrocytes
Dock10	0	2.3298636377456954	0.887	0.419	0	Oligodendrocytes
4930511M06Rik	0	2.2754538921658662	0.562	0.058	0	Oligodendrocytes
St6galnac3	0	2.2557841588963266	0.777	0.36	0	Oligodendrocytes
Mog	0	2.2553592759679892	0.543	0.028	0	Oligodendrocytes
Phlpp1	0	2.2508174738623192	0.854	0.47	0	Oligodendrocytes
Frmd5	0	2.1982608528191045	0.919	0.576	0	Oligodendrocytes
Adipor2	0	2.1669268745243504	0.586	0.144	0	Oligodendrocytes
Map7	0	2.165015715977437	0.84	0.48	0	Oligodendrocytes
Gm44866	0	2.1397752580071026	0.461	0.003	0	Oligodendrocytes
Mag	0	2.1117361120417706	0.548	0.042	0	Oligodendrocytes
Qki	0	2.1059075493159094	0.947	0.529	0	Oligodendrocytes
Cdk19	0	2.0907051543524946	0.673	0.216	0	Oligodendrocytes
Rab31	0	2.0817584079476403	0.649	0.202	0	Oligodendrocytes
Gjc3	0	2.067036955775183	0.563	0.041	0	Oligodendrocytes
Sec14l5	0	2.053682408659397	0.498	0.02	0	Oligodendrocytes
Edil3	0	2.023907385853378	0.916	0.604	0	Oligodendrocytes
Ppp1r16b	0	2.022081081903532	0.616	0.204	0	Oligodendrocytes
Anln	0	1.979643366778602	0.415	0.012	0	Oligodendrocytes
Enpp2	0	1.9552770841833311	0.69	0.192	0	Oligodendrocytes
Gab1	0	1.9176484080424452	0.506	0.066	0	Oligodendrocytes
Erbin	0	1.9043203696340807	0.626	0.224	0	Oligodendrocytes
Pde8a	0	1.8950867542007377	0.495	0.057	0	Oligodendrocytes
Gm42413	0	1.8779188728411218	0.475	0.077	0	Oligodendrocytes
Fa2h	0	1.8727079991903008	0.451	0.026	0	Oligodendrocytes
Pstpip2	0	1.8610956408993453	0.46	0.061	0	Oligodendrocytes
Bcas1	0	1.8257382477032043	0.422	0.058	0	Oligodendrocytes
Arhgap23	0	1.8226618377899484	0.6	0.213	0	Oligodendrocytes
Daam2	0	1.8066908051441222	0.548	0.078	0	Oligodendrocytes
Cdh19	0	1.8016938997400223	0.43	0.037	0	Oligodendrocytes
Tmeff2	0	1.783046095265933	0.957	0.75	0	Oligodendrocytes
Cdh20	0	1.782192532831056	0.581	0.169	0	Oligodendrocytes
A230001M10Rik	0	1.779615629558936	0.391	0.007	0	Oligodendrocytes
Ugt8a	0	1.758843457678935	0.42	0.036	0	Oligodendrocytes
Tspan2	0	1.6633926539683768	0.419	0.067	0	Oligodendrocytes
Trf	0	1.6287627117555425	0.424	0.079	0	Oligodendrocytes
C030029H02Rik	0	1.6257004104065333	0.345	0.005	0	Oligodendrocytes
Plekhh1	0	1.6241855241214278	0.409	0.024	0	Oligodendrocytes
Neat1	0	1.5181368049201058	0.461	0.092	0	Oligodendrocytes
Bcas1os2	0	1.4288172113929543	0.285	0.021	0	Oligodendrocytes
Arhgef10	0	1.4134929403710836	0.37	0.071	0	Oligodendrocytes
Creb5	0	1.4074790220361248	0.312	0.033	0	Oligodendrocytes
Pcdh9	0	1.3523646897531378	0.992	0.897	0	Oligodendrocytes
Ermn	0	1.3443502131291432	0.335	0.033	0	Oligodendrocytes
Sox10	0	1.3062814157534923	0.324	0.035	0	Oligodendrocytes
4930420G21Rik	0	1.2739	0.237	0.003	0	Oligodendrocytes
Gatm	0	1.2281719884508995	0.307	0.046	0	Oligodendrocytes
Slc25a13	0	1.2181341013891456	0.282	0.034	0	Oligodendrocytes
Hapln2	0	1.192886574055153	0.229	0.008	0	Oligodendrocytes
Litaf	0	1.1905879886950383	0.294	0.031	0	Oligodendrocytes
Cldn11	0	1.1838366473054898	0.272	0.029	0	Oligodendrocytes
Ttyh2	0	1.1834761040258217	0.28	0.031	0	Oligodendrocytes
Cpm	0	1.1721111239349322	0.243	0.011	0	Oligodendrocytes
1700047M11Rik	0	1.1430664304616676	0.24	0.009	0	Oligodendrocytes
Slc13a1	0	1.1379012258470185	0.16	0.01	0	Oligodendrocytes
Ppfibp2	0	1.0714888419811601	0.238	0.022	0	Oligodendrocytes
Dock5	0	1.0705127664021823	0.236	0.013	0	Oligodendrocytes
Gm19500	0	1.0649886522136645	0.233	0.003	0	Oligodendrocytes
Gm13905	0	1.0638161108117574	0.218	0.002	0	Oligodendrocytes
Plxnb3	0	1.0513691313819842	0.228	0.008	0	Oligodendrocytes
Tmem63a	0	1.0042810661421764	0.202	0.006	0	Oligodendrocytes
Car2	2.669167574256263e-304	1.7512277353381336	0.551	0.17	8.994027058213905e-300	Oligodendrocytes
Ptgds	1.1098000596629646e-285	2.0142068236249306	0.81	0.494	3.739582281040326e-281	Oligodendrocytes
Vmp1	8.943169970669052e-283	1.7722096336650164	0.784	0.461	3.0134905533166435e-278	Oligodendrocytes
Zeb2	1.2733136979531878e-279	1.6363614393927117	0.831	0.46	4.290557836623061e-275	Oligodendrocytes
Abca8a	1.305733026910333e-272	1.0041353819499226	0.198	0.021	4.399798007477058e-268	Oligodendrocytes
Stard13	2.9688834489141784e-272	1.4626820486197702	0.477	0.131	1.0003949669461215e-267	Oligodendrocytes
Nkain2	8.443641541061555e-270	1.1514567614209108	0.98	0.862	2.8451694536761015e-265	Oligodendrocytes
Mapt	2.784775747553771e-269	1.3538927613842184	0.903	0.758	9.383580358957187e-265	Oligodendrocytes
Tubb4a	2.524053803316003e-266	1.6737482580796397	0.582	0.219	8.505051695653604e-262	Oligodendrocytes
Septin4	1.288037429140543e-265	1.4538265211350878	0.431	0.112	4.340170921231973e-261	Oligodendrocytes
Plekhg1	5.992523743983534e-264	1.1655664658773894	0.359	0.072	2.0192408007726916e-259	Oligodendrocytes
Magi2	2.2497486738826267e-252	1.0322561633032548	0.98	0.909	7.580753131514898e-248	Oligodendrocytes
Phldb1	6.918124464186763e-252	1.347768071908138	0.364	0.083	2.3311312194523718e-247	Oligodendrocytes
Mal	1.4574629179490375e-249	1.4024600950769348	0.373	0.087	4.911067048321077e-245	Oligodendrocytes
Septin7	1.974019651354435e-244	1.6078507714963703	0.826	0.57	6.651656617203903e-240	Oligodendrocytes
Npsr1	1.8408338320886277e-243	1.3803523791279448	0.293	0.054	6.20287368060584e-239	Oligodendrocytes
Otud7b	2.436582359761231e-240	1.5367561857965883	0.48	0.155	8.210307919451445e-236	Oligodendrocytes
Mast3	4.784132783178353e-227	1.5902916367745201	0.66	0.332	1.6120613826197777e-222	Oligodendrocytes
Hecw2	6.545671978402935e-223	1.5323443450607632	0.799	0.582	2.2056296298426532e-218	Oligodendrocytes
Cdc37l1	1.5610639088767244e-220	1.5352135294580407	0.779	0.532	5.260160947351011e-216	Oligodendrocytes
Csrp1	7.660366399435332e-216	1.0982345038103016	0.299	0.062	2.5812370619537292e-211	Oligodendrocytes
Gm16168	4.7043261625779423e-209	1.611551218612261	0.644	0.315	1.5851697437422634e-204	Oligodendrocytes
Pip4k2a	3.948559081410852e-207	1.4683448668310126	0.523	0.206	1.3305064680722008e-202	Oligodendrocytes
Ptprk	2.481099726573413e-203	1.389081473004369	0.739	0.408	8.360313638661773e-199	Oligodendrocytes
Frmd4b	2.399915855162282e-202	1.4392565108758517	0.507	0.194	8.086756465554826e-198	Oligodendrocytes
Ypel2	6.182997579515296e-196	1.6365095241551892	0.595	0.299	2.0834228643934744e-191	Oligodendrocytes
Bcl2l1	2.009213563572696e-194	1.5824177284071776	0.54	0.235	6.770246023814556e-190	Oligodendrocytes
Ano4	5.888024372943571e-194	1.5663291882019874	0.671	0.377	1.9840286927070657e-189	Oligodendrocytes
Hepacam	3.2424866137125254e-186	1.0526910331302255	0.338	0.086	1.0925882893565726e-181	Oligodendrocytes
Grm3	7.804472750887107e-186	1.4679768185415776	0.736	0.466	2.6297951381389196e-181	Oligodendrocytes
Wipf1	1.834443134249101e-182	1.0622499838328614	0.284	0.065	6.181339585165771e-178	Oligodendrocytes
Pak5	1.1808765223700484e-180	1.449357091181106	0.757	0.55	3.979081529778115e-176	Oligodendrocytes
Slc12a2	3.6183079755890235e-180	1.3649377266898486	0.438	0.158	1.2192250554544774e-175	Oligodendrocytes
Tmod2	1.8138042818109928e-177	1.4613855406865695	0.705	0.46	6.1117949079903214e-173	Oligodendrocytes
Pex5l	3.078456037686801e-176	1.38753	0.827	0.631	1.0373165464589444e-171	Oligodendrocytes
Usp54	3.737653845528281e-175	1.3755173193747616	0.478	0.191	1.2594398397892094e-170	Oligodendrocytes
9130019P16Rik	8.365939127912395e-174	1.3278504485497757	0.34	0.098	2.818986848541361e-169	Oligodendrocytes
Rcbtb1	5.352216546299369e-172	1.2576304896896011	0.377	0.122	1.8034828874410353e-167	Oligodendrocytes
Cdc42bpa	7.705198605593861e-168	1.2322818322156244	0.803	0.688	2.5963437221409074e-163	Oligodendrocytes
Kif13b	2.55272432763804e-157	1.4712155281067125	0.586	0.325	8.60165989440914e-153	Oligodendrocytes
Pak1	8.92351862806568e-155	1.437777444568725	0.647	0.408	3.0068688369130117e-150	Oligodendrocytes
Apod	1.541444498140447e-154	1.204458373735222	0.285	0.075	5.19405138093405e-150	Oligodendrocytes
St6gal1	1.7454825164745266e-152	1.2350401698300577	0.395	0.142	5.881577887512565e-148	Oligodendrocytes
Fnbp1	3.6752637416683124e-151	1.4056572907736928	0.7	0.491	1.2384168703925545e-146	Oligodendrocytes
4930419G24Rik	1.1321640880233665e-150	1.4079307073899565	0.73	0.508	3.814940111003536e-146	Oligodendrocytes
Prickle2	4.002980177707873e-141	1.0886363057854958	0.817	0.705	1.348844200680445e-136	Oligodendrocytes
Il1rap	2.2976430055060693e-140	1.2894766534089488	0.489	0.229	7.742137871353251e-136	Oligodendrocytes
Zbtb16	4.499960866985944e-138	1.2733909724191328	0.585	0.32	1.5163068137395838e-133	Oligodendrocytes
Qdpr	5.2028654289955905e-137	1.110649214577628	0.315	0.1	1.753157534954354e-132	Oligodendrocytes
Smad7	7.286878291059918e-136	1.1662926224002412	0.314	0.102	2.45538650895555e-131	Oligodendrocytes
Rffl	3.5718502594651425e-132	1.1702533290186383	0.338	0.118	1.2035706634293744e-127	Oligodendrocytes
Slc38a2	3.3079906127797014e-131	1.3693185654644289	0.584	0.344	1.1146605168822482e-126	Oligodendrocytes
Myo6	4.8080115775972007e-129	1.203448028434692	0.553	0.299	1.6201075811871527e-124	Oligodendrocytes
Abhd17b	7.383746912978828e-129	1.3134859402411678	0.516	0.274	2.488027359797346e-124	Oligodendrocytes
Pik3c2b	1.258633784066267e-127	1.0392174216404375	0.286	0.088	4.2410923987896936e-123	Oligodendrocytes
Slc44a1	3.578115843924825e-127	1.3341480781997235	0.594	0.373	1.205681914768909e-122	Oligodendrocytes
Rnf13	4.1819737684881605e-126	1.2783072299629903	0.492	0.25	1.4091578810297706e-121	Oligodendrocytes
Ttll7	6.203844524358338e-125	1.2685733640434573	0.683	0.507	2.0904474509277856e-120	Oligodendrocytes
Mtmr2	6.630248357862187e-124	1.0664144900654209	0.29	0.093	2.2341284866652424e-119	Oligodendrocytes
Dixdc1	3.63275235732798e-123	1.3686360697957434	0.507	0.27	1.224092234325236e-118	Oligodendrocytes
1810062O18Rik	2.362921279363265e-121	1.1647728697418884	0.379	0.153	7.962099542942457e-117	Oligodendrocytes
Itpk1	2.8158325097764534e-119	1.205416171168238	0.425	0.195	9.488229224942737e-115	Oligodendrocytes
Bin1	4.773231557288687e-118	1.301271519374482	0.575	0.361	1.608388105543996e-113	Oligodendrocytes
Dbndd2	2.0379923016824058e-112	1.2055948524884572	0.394	0.173	6.867218859749034e-108	Oligodendrocytes
Klhl2	3.0888945142703424e-112	1.2696216065396149	0.618	0.425	1.0408338955285345e-107	Oligodendrocytes
Grb14	4.239450072336635e-112	1.244659257107548	0.44	0.213	1.4285250963745524e-107	Oligodendrocytes
Gm4258	2.432335224750199e-111	1.2967343116982566	0.544	0.322	8.19599677331827e-107	Oligodendrocytes
Dnm3	8.929572518694082e-110	1.019183788020817	0.794	0.713	3.008908755899158e-105	Oligodendrocytes
Gm37459	1.1061304428285601e-108	1.352006708517798	0.625	0.418	3.7272171401551165e-104	Oligodendrocytes
Plxdc2	1.058931943615371e-107	1.0652635817697154	0.669	0.482	3.5681770772063544e-103	Oligodendrocytes
Clmn	4.241414649730873e-107	1.1885183236130115	0.5	0.274	1.429187080373315e-102	Oligodendrocytes
Aatk	6.6604229872493e-106	1.2437988901014776	0.467	0.25	2.244296129783524e-101	Oligodendrocytes
Rtn4	1.4773979651136662e-105	1.0140829315871858	0.796	0.726	4.97824018324701e-101	Oligodendrocytes
Pakap	1.6151521355194294e-105	1.3262511693835333	0.637	0.492	5.4424166358462693e-101	Oligodendrocytes
Tbc1d5	6.997761971853315e-105	1.1558255777915385	0.649	0.483	2.357965874035693e-100	Oligodendrocytes
Sh3d19	1.3280063764014861e-102	1.1524866733841956	0.475	0.254	4.474850285922447e-98	Oligodendrocytes
Kctd13	8.063275292220017e-102	1.0510533806018163	0.295	0.108	2.717001242466457e-97	Oligodendrocytes
Agap1	3.313176001049649e-98	1.1036187514752025	0.671	0.536	1.1164077853136897e-93	Oligodendrocytes
Gm48678	4.649014927920914e-97	1.1047321864335597	0.732	0.648	1.5665320701122313e-92	Oligodendrocytes
Zdhhc20	2.4559035484538293e-90	1.1982156415674718	0.586	0.422	8.275412596870023e-86	Oligodendrocytes
Dleu2	8.563251348265758e-89	1.0703549588788008	0.409	0.202	2.88547317431163e-84	Oligodendrocytes
Gm20319	3.9846688155158433e-87	1.1603552890444444	0.441	0.24	1.3426740040762185e-82	Oligodendrocytes
Cipc	1.6138337320600687e-83	1.0811163383235227	0.412	0.218	5.437974143549608e-79	Oligodendrocytes
Gm26936	2.824773298077762e-83	1.0895878215511057	0.433	0.236	9.518356105202827e-79	Oligodendrocytes
Slain1	6.689600641009982e-83	1.0706578633803967	0.387	0.2	2.2541278319947237e-78	Oligodendrocytes
Klf13	1.4889223203320913e-82	1.106391762265607	0.469	0.273	5.017072650591015e-78	Oligodendrocytes
Cerk	2.48520862070237e-81	1.0869459482745725	0.334	0.153	8.374158968318707e-77	Oligodendrocytes
Sgk1	1.6946042973679298e-80	1.0938444470431805	0.469	0.277	5.710138640410976e-76	Oligodendrocytes
Myo1d	2.4393030255615213e-76	1.079262955315265	0.39	0.21	8.219475474932102e-72	Oligodendrocytes
Xrcc6	1.0626876779258272e-73	1.099146771238224	0.611	0.492	3.5808323995388675e-69	Oligodendrocytes
Kif13a	2.898167127075204e-73	1.076374135428293	0.426	0.245	9.765663951392607e-69	Oligodendrocytes
Cryab	3.262037734973394e-72	1.0017359717976397	0.323	0.152	1.0991762351766348e-67	Oligodendrocytes
Gm11149	6.253144853058544e-72	1.0341492838810316	0.646	0.537	2.1070596896866072e-67	Oligodendrocytes
Kndc1	1.0005542465506682e-71	1.0234023178420295	0.311	0.146	3.371467589177131e-67	Oligodendrocytes
Nfasc	4.3227026480857194e-70	1.3006048615336616	0.596	0.497	1.456577884298964e-65	Oligodendrocytes
Itsn2	1.669842268041743e-62	1.2519216823030328	0.526	0.401	5.626700506393457e-58	Oligodendrocytes
Ankrd28	4.0685675061283594e-61	1.006171075004737	0.55	0.421	1.370944506865012e-56	Oligodendrocytes
6330411D24Rik	3.988403369381975e-174	1.714492016267441	0.667	0.107	1.3439323993469504e-169	NMSCs
Meis1	5.952397083557143e-131	1.4737042189105156	0.688	0.141	2.0057197212754147e-126	NMSCs
Zfp804b	4.069160470967203e-89	1.7211554782319718	0.902	0.359	1.3711443122971087e-84	NMSCs
Pbx3	1.230477428707018e-85	1.4009441529870112	0.855	0.311	4.1462167437711677e-81	NMSCs
Arhgap24	6.637422703548376e-84	1.5425274868420586	0.603	0.164	2.236545954187661e-79	NMSCs
Tmem163	1.0505545256092224e-78	1.0522869908525694	0.675	0.2	3.539948529492836e-74	NMSCs
Zbtb7c	1.947545936536049e-69	1.0598123789935616	0.654	0.209	6.562450787751871e-65	NMSCs
Sema5a	2.7460822416205383e-69	1.2531798310091764	0.641	0.207	9.253198721364567e-65	NMSCs
Grid2	1.517583058456041e-55	1.0419599413892988	0.979	0.803	5.1136478737734756e-51	NMSCs
Hs3st4	1.8374880996020815e-52	1.3073224305029076	0.786	0.396	6.191599900419174e-48	NMSCs
Mgat4c	1.03587340609118e-49	1.508712897702646	0.893	0.602	3.4904790291648406e-45	NMSCs
Marchf1	6.729648314235093e-49	1.1962103906513404	0.962	0.677	2.267622295964657e-44	NMSCs
Inpp4b	4.3128583971147728e-47	1.0485488576497284	0.893	0.498	1.453260765491794e-42	NMSCs
Ndst4	1.409927005675243e-44	1.21289	0.479	0.157	4.750890038323299e-40	NMSCs
Gm28905	2.4811057351873084e-43	1.1378135688180968	0.598	0.245	8.360333885287155e-39	NMSCs
Unc13c	4.43189084590895e-41	1.0161964053392047	0.726	0.346	1.4933699394374797e-36	NMSCs
Prr16	4.2568353472804304e-39	1.0773364672574477	0.765	0.412	1.4343832386196138e-34	NMSCs
Thsd7b	8.647132680925923e-39	1.0678798302134482	0.688	0.333	2.9137378281647992e-34	NMSCs
Ebf1	2.577580877397462e-34	1.3311768378260829	0.269	0.068	8.685416524478489e-30	NMSCs
Cntn5	4.647838569431207e-33	1.0938034438684863	0.932	0.66	1.5661356843555395e-28	NMSCs
Gm32647	3.501718424391016e-31	1.5515247411283717	0.521	0.235	1.1799390402827968e-26	NMSCs
Pcdh11x	7.017327220384187e-31	1.2885536612131288	0.658	0.37	2.3645585801806555e-26	NMSCs
Inpp5d	0	3.2895968822036648	0.841	0.009	0	Microglia
Tgfbr1	0	3.1183923733024774	0.825	0.061	0	Microglia
Ccnd3	0	2.551817705640408	0.809	0.108	0	Microglia
Dock8	0	2.4074964921483835	0.645	0.007	0	Microglia
Gm2629	0	2.2967838452803413	0.58	0.003	0	Microglia
Fyb	0	2.2842509916557554	0.593	0.007	0	Microglia
Itgb5	0	2.2611812478963746	0.627	0.031	0	Microglia
Adap2os	0	2.18424	0.59	0.007	0	Microglia
Adap2	0	2.1708987614726385	0.598	0.006	0	Microglia
Apbb1ip	0	2.1069693409993695	0.585	0.02	0	Microglia
Dock2	0	2.0966306041566236	0.634	0.08	0	Microglia
Gm2245	0	2.089683482397075	0.514	0.002	0	Microglia
Arhgap45	0	2.0608425210689387	0.535	0.005	0	Microglia
Selplg	0	2.0546723535647184	0.561	0.02	0	Microglia
Mertk	0	2.0194912916967978	0.807	0.124	0	Microglia
Slco2b1	0	1.9447290980461351	0.501	0.005	0	Microglia
Fli1	0	1.9264217507811228	0.504	0.012	0	Microglia
Siglech	0	1.9231595565669273	0.475	0.006	0	Microglia
Ikzf1	0	1.8972610565283157	0.486	0.002	0	Microglia
Entpd1	0	1.8503681734413207	0.535	0.033	0	Microglia
Runx1	0	1.8493504291702942	0.493	0.009	0	Microglia
Csf1r	0	1.7602232715810282	0.444	0.021	0	Microglia
Gm10790	0	1.7067103131317134	0.423	0.003	0	Microglia
Cdh23	0	1.6889745034494537	0.488	0.033	0	Microglia
Abca9	0	1.6786660752458094	0.46	0.026	0	Microglia
Vis1	0	1.6555173679921842	0.42	0.002	0	Microglia
Agmo	0	1.6158974326507891	0.444	0.031	0	Microglia
Cyth4	0	1.5962484682332256	0.428	0.005	0	Microglia
Ly86	0	1.5886302249771282	0.394	0.01	0	Microglia
Gm50035	0	1.5832595477674631	0.436	0.001	0	Microglia
Bank1	0	1.5765381885583285	0.366	0.008	0	Microglia
Unc93b1	0	1.5494781938029234	0.42	0.009	0	Microglia
Cfh	0	1.51038	0.347	0.009	0	Microglia
Fgd2	0	1.491955956265386	0.368	0.004	0	Microglia
Ccr5	0	1.488711989536728	0.36	0.013	0	Microglia
Gm31243	0	1.453522572230628	0.347	0.014	0	Microglia
Csf3r	0	1.4375758019560894	0.355	0.004	0	Microglia
Lcp2	0	1.4328162841875678	0.363	0.009	0	Microglia
Rasgrp3	0	1.3896977430376671	0.381	0.015	0	Microglia
Blnk	0	1.3691520236002592	0.363	0.02	0	Microglia
Hk2	0	1.3347922804822223	0.313	0.003	0	Microglia
Stab1	0	1.3218278654592157	0.256	0.003	0	Microglia
Rbm47	0	1.309159654490409	0.258	0.005	0	Microglia
A830008E24Rik	0	1.2781988852254986	0.287	0.011	0	Microglia
Nckap1l	0	1.2643013485509174	0.298	0.006	0	Microglia
Lair1	0	1.261072104130771	0.287	0.012	0	Microglia
4930469K13Rik	0	1.246825121915135	0.321	0.011	0	Microglia
Tbxas1	0	1.222293327235557	0.295	0.016	0	Microglia
P2ry6	0	1.2116720556097536	0.295	0.003	0	Microglia
Col27a1	0	1.203064856948842	0.3	0.016	0	Microglia
Il6ra	0	1.196366123244735	0.324	0.011	0	Microglia
Itgam	0	1.0966891942557078	0.277	0.003	0	Microglia
Mir142hg	0	1.0942563265397538	0.253	0.008	0	Microglia
Plcg2	0	1.0834566706735722	0.285	0.012	0	Microglia
8030442B05Rik	0	1.064492655119566	0.285	0.003	0	Microglia
Bin2	0	1.0537993569385466	0.235	0.003	0	Microglia
Tg	0	1.0430846912613791	0.235	0.009	0	Microglia
Ncf1	0	1.0278460315128413	0.238	0.008	0	Microglia
Gm20528	0	1.0191672859278431	0.204	0.006	0	Microglia
Dapp1	0	1.0165808208789648	0.238	0.008	0	Microglia
Rhoh	0	1.006738353788554	0.251	0.002	0	Microglia
Vsir	0	1.0047340593559295	0.258	0.012	0	Microglia
0610040J01Rik	1.3120634932316803e-305	1.472809497056141	0.386	0.03	4.42112914679347e-301	Microglia
Myo1f	7.64053483613291e-284	1.185059253562085	0.308	0.02	2.5745546183833454e-279	Microglia
Insyn2b	3.121214496931142e-265	1.837641554106961	0.554	0.075	1.0517244368859177e-260	Microglia
Gm34408	6.949041680921512e-258	1.0953561576638844	0.251	0.014	2.3415490848033127e-253	Microglia
Epb41l2	1.4800730130170826e-228	2.202033837236695	0.713	0.154	4.987254024662361e-224	Microglia
Ifitm10	2.481475956034608e-227	1.6126123650583382	0.426	0.05	8.361581381454215e-223	Microglia
Pld1	4.1860892552700604e-223	1.3734114760054508	0.42	0.048	1.4105446354557995e-218	Microglia
Cx3cr1	7.198981136897643e-219	1.759019323509884	0.517	0.079	2.4257686838890296e-214	Microglia
Dleu2	2.6681719391814214e-211	2.2606405302601655	0.786	0.204	8.990672166265718e-207	Microglia
Ctss	2.4596365758156293e-204	1.3650961694159358	0.371	0.042	8.287991405868345e-200	Microglia
Arhgap22	2.1676996865512724e-198	1.3450929371458296	0.381	0.046	7.304280863803168e-194	Microglia
E230029C05Rik	1.7164581362145582e-183	2.022158451434217	0.58	0.122	5.783777335788575e-179	Microglia
Tgfbr2	1.8547995188154846e-178	1.0489202258488395	0.285	0.028	6.249932458600657e-174	Microglia
Pag1	3.4381043071614045e-176	2.1154824841841493	0.778	0.246	1.1585036273411068e-171	Microglia
Zfhx3	5.9921992810077826e-158	1.927872762620509	0.851	0.304	2.0191314697283825e-153	Microglia
Srgap2	7.418689223164858e-154	2.1922105194345978	0.927	0.558	2.4998015206376306e-149	Microglia
Gm32036	3.587924024059722e-153	1.8472322664984282	0.645	0.168	1.2089868791471639e-148	Microglia
Lpcat2	1.1037131726460921e-152	1.4660732739256326	0.457	0.084	3.719071906548272e-148	Microglia
Ptprc	3.371356951684608e-150	1.0519648534834343	0.269	0.029	1.1360124384396456e-145	Microglia
Ankrd44	8.804327164814966e-146	1.5584075674375084	0.564	0.13	2.966706081456051e-141	Microglia
Elmo1	1.5662494614115101e-134	1.903392380021635	0.914	0.54	5.2776341851722246e-130	Microglia
Bmp2k	7.348429234022966e-131	1.4336108599332575	0.454	0.093	2.4761267146963784e-126	Microglia
Gm16337	3.354822049656635e-130	1.723649188504965	0.561	0.146	1.1304408378522997e-125	Microglia
Plxdc2	1.3978187564826412e-128	2.0644859367789854	0.883	0.485	4.710090081843907e-124	Microglia
Itpr2	8.706800776591125e-127	1.2276932517493782	0.475	0.098	2.9338435896801455e-122	Microglia
Rreb1	1.517381475175348e-126	1.9320477398492018	0.681	0.226	5.112968618750853e-122	Microglia
Lyn	2.9935138557547164e-126	1.9316769091382233	0.762	0.305	1.0086944288351091e-121	Microglia
Gpr34	9.411938575829825e-122	1.0585102394870505	0.324	0.051	3.171446822511618e-117	Microglia
Pde3b	5.32078176987808e-121	2.102863811890691	0.679	0.246	1.7928906251781178e-116	Microglia
Zfp710	1.6472678402744577e-119	1.6969289185546967	0.601	0.181	5.5506337145888125e-115	Microglia
Maml3	7.600374664708827e-118	1.830192663157439	0.778	0.317	2.5610222470202863e-113	Microglia
Capn3	5.167913417934857e-114	1.094148173893289	0.258	0.035	1.7413801053073293e-109	Microglia
Kcnrg	2.558222605088129e-110	1.2741746985901776	0.386	0.078	8.62018689010496e-106	Microglia
Ldlrad4	4.4812016945146014e-108	1.7990729677798543	0.838	0.468	1.50998572298364e-103	Microglia
Mef2a	2.1975362546828182e-105	1.8200120431627675	0.867	0.537	7.404818163779225e-101	Microglia
Pip4k2a	6.686350439158872e-104	1.5497937271232436	0.624	0.216	2.2530326439789737e-99	Microglia
Lrmda	5.27654240915311e-101	1.4938635013119388	0.433	0.101	1.777983730188232e-96	Microglia
Frmd4b	3.2267371769632026e-92	1.5261850750886314	0.59	0.204	1.0872813591495208e-87	Microglia
Ssh2	1.0134792414783438e-91	1.47417	0.909	0.653	3.4150196520854273e-87	Microglia
Otulinl	1.5140051858099796e-91	1.4983525758963536	0.525	0.166	5.101591874105307e-87	Microglia
Chn2	1.6268066249419344e-86	1.4096491437208039	0.535	0.171	5.481687603404342e-82	Microglia
Lysmd4	1.3386245420390452e-84	1.6054268205435076	0.82	0.5	4.510629256854767e-80	Microglia
Phyhd1	1.2856332509071918e-82	1.2782897566741553	0.488	0.15	4.332069802256874e-78	Microglia
Mbnl1	4.660226275740679e-81	1.545845455327787	0.715	0.351	1.570309845873579e-76	Microglia
P3h2	3.674781519962998e-80	1.1629331260873053	0.389	0.101	1.2382543809667317e-75	Microglia
Rapgef5	1.0689764092978951e-78	1.4387597913150763	0.799	0.467	3.602022908770187e-74	Microglia
Lgmn	5.218704726376491e-75	1.0531257242130563	0.384	0.102	1.7584947445998223e-70	Microglia
Maf	1.2631083662522984e-74	1.144833376371275	0.379	0.098	4.256169950923745e-70	Microglia
Hexb	1.5559291432054287e-74	1.567937477580867	0.708	0.353	5.2428588409450126e-70	Microglia
Numb	2.503602318451374e-74	1.5654446221656013	0.734	0.4	8.43613837225375e-70	Microglia
Wasf2	5.627429083349755e-74	1.3096600772800069	0.452	0.139	1.8962185039255333e-69	Microglia
Tmcc3	1.3883286630204492e-73	1.4571154224722602	0.708	0.329	4.678112262913706e-69	Microglia
Serinc3	1.0500448882627706e-72	1.3604465283688452	0.52	0.184	3.538231255490232e-68	Microglia
Itga9	1.0829711770805616e-72	1.0514276907728899	0.311	0.071	3.6491796782906606e-68	Microglia
Picalm	1.4718980747627577e-72	1.5302366084444095	0.65	0.301	4.959707752720588e-68	Microglia
Dock4	4.3442767793332275e-71	1.2236137140702597	0.888	0.677	1.4638475035641243e-66	Microglia
Tanc2	1.60215740641085e-70	1.1135702051681586	0.927	0.803	5.398629596642e-66	Microglia
Rrbp1	2.2681352324607096e-70	1.36823	0.527	0.201	7.642708479299607e-66	Microglia
Hck	3.8323408349321075e-69	1.0102044492213018	0.316	0.077	1.291345567738723e-64	Microglia
Ivns1abp	1.1083506574613463e-67	1.3715505208908472	0.525	0.199	3.7346983753817524e-63	Microglia
4930444A19Rik	2.4146562297375304e-66	1.2649649120036854	0.389	0.114	8.136425631723582e-62	Microglia
Sat1	2.809664933715021e-63	1.0068390560414953	0.381	0.109	9.467446960646135e-59	Microglia
Ophn1	1.7929293392838714e-61	1.507319138983851	0.661	0.339	6.041454701650933e-57	Microglia
Peli2	5.006871215860765e-61	1.1729304235760842	0.402	0.13	1.6871153248964434e-56	Microglia
Slc8a1	1.5903161669608226e-60	1.0469725142905988	0.93	0.754	5.358729356191188e-56	Microglia
Etv6	4.57598567766558e-59	1.1269916462368967	0.538	0.229	1.541924133946194e-54	Microglia
St3gal6	7.709188683815137e-58	1.051077426325379	0.381	0.119	2.5976882188983485e-53	Microglia
Nav2	1.1947657530532922e-57	1.1810160103833551	0.869	0.739	4.0258826814883733e-53	Microglia
Zeb2	1.6151097138987273e-57	1.2698120481373245	0.809	0.475	5.4422736919531515e-53	Microglia
Cttnbp2nl	5.7300458454437726e-55	1.0419536503449596	0.376	0.122	1.9307962480807337e-50	Microglia
Fkbp5	7.491131998246699e-55	1.3825114198929693	0.611	0.301	2.524211838129208e-50	Microglia
Skap2	2.144320143122223e-54	1.1132778418364797	0.392	0.133	7.225501154264643e-50	Microglia
4933406I18Rik	3.132811382954804e-53	1.4030053098862891	0.653	0.384	1.0556321236004507e-48	Microglia
Snx29	1.2830607904038355e-52	1.1781504099658724	0.658	0.368	4.323401639344764e-48	Microglia
Gab2	1.90068002083473e-52	1.2684752552874348	0.624	0.311	6.404531398204706e-48	Microglia
Hpgds	3.63297284605743e-52	1.2556202987816936	0.527	0.238	1.2241665302075115e-47	Microglia
Dennd4a	2.4719638410922994e-51	1.2996755161720392	0.713	0.452	8.329529358944613e-47	Microglia
Nrip1	2.1467092522763682e-49	1.1336401687075623	0.491	0.21	7.23355149647045e-45	Microglia
Ubash3b	9.237771129699113e-48	1.1952569618505229	0.478	0.203	3.112759359863413e-43	Microglia
Akap13	2.007382145013315e-47	1.1688641800374535	0.514	0.235	6.764074875836866e-43	Microglia
Gtf2h2	2.962799152950917e-47	1.1704445780729833	0.446	0.185	9.983448025783411e-43	Microglia
Nr6a1	5.715831416898586e-47	1.2575620953196807	0.715	0.466	1.9260065542381477e-42	Microglia
Gm35188	2.2689307208008043e-44	1.2533086419440065	0.836	0.676	7.64538895681039e-40	Microglia
Fchsd2	3.1990212099745606e-37	1.1440144210077012	0.718	0.527	1.077942186913028e-32	Microglia
Lrch1	2.7772983433543556e-36	1.0997768255346565	0.598	0.365	9.358384497766837e-32	Microglia
Gm46367	3.924406673436871e-36	1.1593574246581906	0.64	0.401	1.322368072681288e-31	Microglia
Plcl2	2.4045717077405266e-34	1.14485	0.634	0.42	8.102444826402479e-30	Microglia
Arsb	1.9348024570691538e-27	1.0109784433755586	0.491	0.28	6.519510359340221e-23	Microglia
Rnf216	6.2607678514079124e-27	1.119058165683549	0.585	0.394	2.1096283352104102e-22	Microglia
Wdr17	0	3.85122	0.991	0.586	0	Astrocytes
Slc1a2	0	3.816572785046554	0.993	0.514	0	Astrocytes
Gpc5	0	3.751950083958615	0.988	0.29	0	Astrocytes
Slc1a3	0	3.235908312935474	0.892	0.14	0	Astrocytes
Gm20713	0	3.1327287791809435	0.932	0.142	0	Astrocytes
Mertk	0	3.079240460860168	0.863	0.063	0	Astrocytes
Atp1a2	0	2.903796431910905	0.893	0.198	0	Astrocytes
Nhsl1	0	2.8813410909924895	0.758	0.048	0	Astrocytes
Rorb	0	2.8600712071524423	0.841	0.124	0	Astrocytes
Lhfp	0	2.811806469091663	0.756	0.094	0	Astrocytes
Slc4a4	0	2.74697	0.878	0.27	0	Astrocytes
Gm3764	0	2.706290222408171	0.892	0.293	0	Astrocytes
Msi2	0	2.7061195738201698	0.936	0.446	0	Astrocytes
Luzp2	0	2.5714592204798397	0.861	0.49	0	Astrocytes
Prex2	0	2.5248628630590355	0.76	0.174	0	Astrocytes
Nfia	0	2.4309513209310873	0.885	0.289	0	Astrocytes
Ntm	0	2.364688511394476	0.99	0.786	0	Astrocytes
Gm6145	0	2.315275937628565	0.622	0.02	0	Astrocytes
Pitpnc1	0	2.2439010938279296	0.836	0.381	0	Astrocytes
Plpp3	0	2.23487	0.727	0.158	0	Astrocytes
Slco1c1	0	2.220943944419331	0.569	0.034	0	Astrocytes
Nwd1	0	2.1919730434845834	0.592	0.034	0	Astrocytes
Npas3	0	2.1449778477767047	0.96	0.554	0	Astrocytes
Phkg1	0	2.081384909967591	0.56	0.05	0	Astrocytes
Gli3	0	2.0471070793842276	0.544	0.032	0	Astrocytes
Ptprz1	0	2.0462196155866423	0.913	0.486	0	Astrocytes
Sparcl1	0	2.0434499109068867	0.849	0.406	0	Astrocytes
Dtna	0	2.027462221575096	0.858	0.508	0	Astrocytes
Phka1	0	2.0264569572507147	0.616	0.126	0	Astrocytes
Neat1	0	2.0122412880825657	0.58	0.065	0	Astrocytes
Lama2	0	2.0121516851514776	0.558	0.043	0	Astrocytes
Zbtb20	0	1.9952134231364003	0.952	0.566	0	Astrocytes
Trps1	0	1.9755190628416635	0.835	0.388	0	Astrocytes
Rora	0	1.9718120468056428	0.984	0.802	0	Astrocytes
Htra1	0	1.958902360030178	0.603	0.093	0	Astrocytes
Slc39a12	0	1.924364030547623	0.517	0.053	0	Astrocytes
Qki	0	1.9145366613532608	0.924	0.514	0	Astrocytes
Rgs20	0	1.9069071183001092	0.72	0.337	0	Astrocytes
Maml2	0	1.9062389288549364	0.761	0.278	0	Astrocytes
Glis3	0	1.9014323739596706	0.548	0.08	0	Astrocytes
Tcf7l2	0	1.8673413055397061	0.547	0.038	0	Astrocytes
Paqr8	0	1.8637269222184152	0.525	0.059	0	Astrocytes
Ndrg2	0	1.8615042236702841	0.757	0.286	0	Astrocytes
Sfxn5	0	1.8452135636899838	0.651	0.242	0	Astrocytes
Hdac8	0	1.842520046975584	0.787	0.468	0	Astrocytes
Cpe	0	1.8351610632000028	0.946	0.747	0	Astrocytes
Irak2	0	1.8168765038091164	0.466	0.04	0	Astrocytes
Ttyh1	0	1.793680966102582	0.794	0.436	0	Astrocytes
Atp13a4	0	1.752934300497852	0.445	0.015	0	Astrocytes
Mapk4	0	1.7515668656037868	0.692	0.291	0	Astrocytes
Daam2	0	1.746642830936471	0.529	0.061	0	Astrocytes
Sash1	0	1.7323274005983693	0.617	0.181	0	Astrocytes
Cables1	0	1.728606963561244	0.535	0.139	0	Astrocytes
Bcan	0	1.7216661886158473	0.534	0.098	0	Astrocytes
Appl2	0	1.7150136835281125	0.505	0.1	0	Astrocytes
Kank1	0	1.7068764719177092	0.482	0.06	0	Astrocytes
Mir99ahg	0	1.702551897674546	0.934	0.656	0	Astrocytes
Prdm16	0	1.6965699004226642	0.419	0.012	0	Astrocytes
Bmpr1b	0	1.6965240348693515	0.47	0.057	0	Astrocytes
Glul	0	1.6889600249506902	0.604	0.183	0	Astrocytes
Sat1	0	1.6835569078322503	0.472	0.078	0	Astrocytes
Adk	0	1.6780225039953267	0.681	0.34	0	Astrocytes
Fars2	0	1.6737665125030083	0.725	0.456	0	Astrocytes
Acsl3	0	1.6646882957409277	0.623	0.229	0	Astrocytes
Rfx4	0	1.651095254095544	0.45	0.065	0	Astrocytes
Frmpd1	0	1.6412713879424714	0.414	0.032	0	Astrocytes
Dio2	0	1.6275979763633366	0.314	0.025	0	Astrocytes
Nckap5	0	1.6272287267419425	0.755	0.383	0	Astrocytes
Plekhg1	0	1.6249241804111327	0.462	0.051	0	Astrocytes
Gm29683	0	1.6190626058868443	0.489	0.138	0	Astrocytes
Folh1	0	1.600924484375576	0.406	0.02	0	Astrocytes
Acsbg1	0	1.595013008012758	0.427	0.028	0	Astrocytes
Slc7a10	0	1.58408	0.413	0.025	0	Astrocytes
Mmd2	0	1.5750362820572188	0.549	0.189	0	Astrocytes
Egfr	0	1.5746656117834803	0.424	0.042	0	Astrocytes
F3	0	1.5738787497395457	0.418	0.046	0	Astrocytes
Ptch1	0	1.5726762822824516	0.497	0.185	0	Astrocytes
Myo6	0	1.5659981042406632	0.644	0.28	0	Astrocytes
Gm31356	0	1.5478446921590183	0.409	0.088	0	Astrocytes
Son	0	1.5404	0.967	0.836	0	Astrocytes
Hepacam	0	1.5277928233754632	0.448	0.066	0	Astrocytes
Kcnn2	0	1.5217540036590504	0.803	0.522	0	Astrocytes
Gm973	0	1.5133566214567968	0.393	0.037	0	Astrocytes
Gm35188	0	1.5030920945171085	0.867	0.66	0	Astrocytes
Tspan7	0	1.4954863764007764	0.851	0.68	0	Astrocytes
Farp1	0	1.495320075907809	0.776	0.52	0	Astrocytes
Hif3a	0	1.4941084815897452	0.397	0.025	0	Astrocytes
Fam20a	0	1.4848747643330351	0.381	0.054	0	Astrocytes
Pnpla7	0	1.467284097688211	0.389	0.046	0	Astrocytes
Ccnd3	0	1.4639309942076628	0.46	0.086	0	Astrocytes
Gli2	0	1.4526985977289524	0.364	0.011	0	Astrocytes
Fam107a	0	1.4451815622450783	0.389	0.043	0	Astrocytes
Grin2c	0	1.4447907224810321	0.347	0.008	0	Astrocytes
Glud1	0	1.4394752910281023	0.582	0.27	0	Astrocytes
Nxn	0	1.4245383677277095	0.44	0.104	0	Astrocytes
Dock1	0	1.4199154281006852	0.536	0.182	0	Astrocytes
Fgfr3	0	1.4182009316745614	0.357	0.019	0	Astrocytes
Arhgef4	0	1.3929056274742555	0.464	0.161	0	Astrocytes
Arhgef26	0	1.3927373708022601	0.422	0.11	0	Astrocytes
Lrig1	0	1.3857896962196967	0.349	0.045	0	Astrocytes
Ntsr2	0	1.3823384040381812	0.405	0.078	0	Astrocytes
Fry	0	1.3811744719871206	0.859	0.703	0	Astrocytes
Gabrb1	0	1.3759274844770943	0.964	0.831	0	Astrocytes
Tox	0	1.3739562362229252	0.677	0.319	0	Astrocytes
Slc6a11	0	1.370058152478327	0.37	0.084	0	Astrocytes
9430041J12Rik	0	1.3675456788376577	0.342	0.05	0	Astrocytes
Gja1	0	1.364915860444096	0.377	0.045	0	Astrocytes
Prkd1	0	1.351081321261388	0.502	0.174	0	Astrocytes
Eps8	0	1.3493522821231925	0.48	0.174	0	Astrocytes
Clybl	0	1.346804115231944	0.423	0.134	0	Astrocytes
Stox2	0	1.331079619275572	0.789	0.589	0	Astrocytes
Gramd3	0	1.3221566183665767	0.331	0.024	0	Astrocytes
Fgfr2	0	1.3195217990019126	0.948	0.861	0	Astrocytes
Sox6	0	1.3189529607016932	0.694	0.21	0	Astrocytes
Trpm3	0	1.3087028624333836	0.929	0.606	0	Astrocytes
Plcd4	0	1.2979246510721896	0.337	0.04	0	Astrocytes
Gpm6b	0	1.2961490327427787	0.844	0.644	0	Astrocytes
Myo10	0	1.2912642251232689	0.398	0.085	0	Astrocytes
Itpr2	0	1.2707282024392168	0.406	0.075	0	Astrocytes
Apoe	0	1.2472378615832285	0.969	0.878	0	Astrocytes
Trim9	0	1.235910729296077	0.809	0.633	0	Astrocytes
Il18	0	1.2340745724800752	0.361	0.064	0	Astrocytes
Cdh20	0	1.2281133982258268	0.483	0.162	0	Astrocytes
Pla2g7	0	1.2232839473182961	0.378	0.101	0	Astrocytes
Macf1	0	1.19539	0.951	0.845	0	Astrocytes
Acss1	0	1.1940214703546512	0.331	0.046	0	Astrocytes
Tnfaip8	0	1.1902563318870014	0.287	0.027	0	Astrocytes
Slc7a11	0	1.1884479088962674	0.282	0.022	0	Astrocytes
Rapgef3	0	1.1717183816858379	0.314	0.041	0	Astrocytes
Megf10	0	1.1630093578680047	0.314	0.034	0	Astrocytes
Gm13872	0	1.1588530761869398	0.277	0.018	0	Astrocytes
Zfp521	0	1.156176202019421	0.339	0.078	0	Astrocytes
2900052N01Rik	0	1.1480809370378406	0.276	0.045	0	Astrocytes
Palld	0	1.1462945371682678	0.284	0.034	0	Astrocytes
S1pr1	0	1.1440650417363996	0.29	0.034	0	Astrocytes
Fgd6	0	1.1439486748299086	0.294	0.034	0	Astrocytes
Celrr	0	1.1426343683705737	0.284	0.033	0	Astrocytes
Tnik	0	1.1239571812291662	0.887	0.782	0	Astrocytes
Nrxn1	0	1.116408680771797	0.999	0.935	0	Astrocytes
St3gal4	0	1.0994896076945406	0.287	0.055	0	Astrocytes
Rftn2	0	1.0867601825802145	0.286	0.031	0	Astrocytes
Rgma	0	1.0859238404061837	0.293	0.056	0	Astrocytes
Dpf3	0	1.0804496411085862	0.307	0.062	0	Astrocytes
Gm11266	0	1.0803740038376435	0.26	0.026	0	Astrocytes
Cdh19	0	1.0536032601459446	0.276	0.037	0	Astrocytes
Dbx2	0	1.0444139513087725	0.251	0.03	0	Astrocytes
Ntrk2	0	1.0383711133639317	0.897	0.755	0	Astrocytes
Gjb6	0	1.0359491501419948	0.248	0.013	0	Astrocytes
Emx2os	0	1.034604643728698	0.236	0.016	0	Astrocytes
4930505G20Rik	0	1.0332628561768027	0.233	0.02	0	Astrocytes
Prrx1	0	1.0261818348548015	0.248	0.017	0	Astrocytes
Itih3	0	1.0103259150162804	0.207	0.016	0	Astrocytes
Abca1	0	1.0008217196668023	0.293	0.046	0	Astrocytes
Slc27a1	1.1287138200005895e-303	1.2045868913090754	0.382	0.112	3.8033140878739867e-299	Astrocytes
Ddah1	1.3036064111662585e-303	1.280957880877044	0.398	0.121	4.3926321630658246e-299	Astrocytes
Ddhd1	4.12044614613067e-301	1.4928203327122915	0.644	0.375	1.3884255334001906e-296	Astrocytes
Lix1	4.415820137248924e-294	1.3782644510066673	0.421	0.142	1.4879547534473973e-289	Astrocytes
Tmem164	9.579500117537893e-290	1.418938776528793	0.51	0.214	3.2279083596055685e-285	Astrocytes
Grm3	8.270804790667916e-288	1.4468286926630818	0.713	0.458	2.786930382263461e-283	Astrocytes
Fads2	5.128517183833502e-285	1.1477539666215002	0.361	0.103	1.7281051502645368e-280	Astrocytes
Hes5	7.019695827446079e-285	1.0213027935615198	0.267	0.055	2.3653567060162306e-280	Astrocytes
Mcc	3.3927230042265325e-274	1.3652572477363645	0.513	0.223	1.1432119435041724e-269	Astrocytes
Gng12	6.588510421543739e-271	1.219720066708976	0.408	0.137	2.2200644716433784e-266	Astrocytes
Spire1	2.7086809490110527e-270	1.3596449608268355	0.715	0.519	9.127171325787644e-266	Astrocytes
Csgalnact1	6.8662494758207475e-267	1.3090053126284666	0.621	0.336	2.313651423372559e-262	Astrocytes
Insyn2a	1.0045337924926097e-261	1.1239187429763584	0.354	0.105	3.3848770671830975e-257	Astrocytes
Gnao1	7.778879201119012e-252	1.1527278895600914	0.808	0.709	2.6211711356090622e-247	Astrocytes
Lpp	6.8782645415155254e-251	1.2926126200036658	0.505	0.229	2.317700019909071e-246	Astrocytes
Scrg1	1.1233498901325731e-250	1.0436678322387143	0.32	0.088	3.7852397897907186e-246	Astrocytes
Zhx3	1.541459114443214e-248	1.381771885517049	0.586	0.33	5.194100632027854e-244	Astrocytes
Bcl2	9.472038289584547e-248	1.2775106173161617	0.436	0.171	3.191698022058409e-243	Astrocytes
Foxo1	1.3142783800002705e-247	1.096059470623207	0.315	0.088	4.428592429248911e-243	Astrocytes
Nim1k	5.568242666486883e-246	1.3114358628836924	0.436	0.174	1.87627504889942e-241	Astrocytes
Gm14858	2.5326381380719574e-244	1.3719830619352829	0.514	0.249	8.533977470047268e-240	Astrocytes
Gm48747	5.9968560165278565e-242	1.3191820984650853	0.655	0.43	2.0207006033292264e-237	Astrocytes
Cspg5	4.9216055721321696e-239	1.3083349375782805	0.643	0.395	1.6583842135856558e-234	Astrocytes
Pard3b	1.3759601149336375e-235	1.1248099211981555	0.514	0.229	4.636435203280385e-231	Astrocytes
Gm5089	3.54563701299758e-235	1.0905471126930928	0.315	0.092	1.1947378478996647e-230	Astrocytes
Clmn	2.7559582818658857e-229	1.2578848516559744	0.529	0.262	9.286477026575288e-225	Astrocytes
Nfib	6.371320847971473e-227	1.0255681820343023	0.731	0.442	2.1468802729324674e-222	Astrocytes
Plcb4	1.4409514321985115e-223	1.2100596892383788	0.582	0.316	4.8554299459361044e-219	Astrocytes
Prdx6	4.81905396325604e-218	1.1668464996223171	0.474	0.215	1.6238284234587552e-213	Astrocytes
Ston2	1.8758590818579446e-216	1.0202690969889903	0.302	0.09	6.32089476222853e-212	Astrocytes
Vcl	4.946290056869294e-215	1.211036153088717	0.422	0.176	1.6667018975626772e-210	Astrocytes
Asrgl1	7.957696502320831e-209	1.0986109860350894	0.418	0.171	2.6814254134220273e-204	Astrocytes
Arhgap5	4.538003983641684e-202	1.1921273025858634	0.63	0.423	1.529125822327902e-197	Astrocytes
Scd2	7.036441029314934e-199	1.1009385286045676	0.683	0.493	2.37099916923796e-194	Astrocytes
Mgll	1.148951166844772e-197	1.210316689647689	0.456	0.214	3.8715058518001435e-193	Astrocytes
Ptn	4.956201131359975e-190	1.0261251947219925	0.726	0.557	1.670041533223057e-185	Astrocytes
Map2k6	3.6920669306927384e-189	1.1910659580970133	0.52	0.289	1.2440788729662252e-184	Astrocytes
Grk3	1.1192285730290199e-187	1.2062722065534863	0.497	0.267	3.771352599678585e-183	Astrocytes
Plce1	1.1485552160197252e-184	1.0862625957912426	0.345	0.128	3.8701716559000665e-180	Astrocytes
Tead1	5.063313356079403e-183	1.042426593954165	0.375	0.152	1.7061340684645157e-178	Astrocytes
Gm16168	1.0268625803300192e-181	1.2928321711924213	0.542	0.312	3.4601161506800325e-177	Astrocytes
Igsf11	9.326999417251699e-180	1.0661937689877081	0.464	0.228	3.1428257236371325e-175	Astrocytes
Pde7b	1.0239850793772381e-177	1.0122855374444304	0.593	0.348	3.450420123469541e-173	Astrocytes
Igsf8	1.298266152112479e-176	1.094427491041286	0.492	0.261	4.374637626158209e-172	Astrocytes
Camk2g	2.001935940161299e-166	1.1600540096922753	0.518	0.31	6.745723343967512e-162	Astrocytes
Gm48765	1.8237933965020815e-161	1.2790237743715371	0.559	0.371	6.145454228853413e-157	Astrocytes
Fam184a	1.5390276564791818e-159	1.1898028290894243	0.524	0.326	5.185907591272251e-155	Astrocytes
Fnbp1	3.5748918653061187e-159	1.001334691059793	0.643	0.489	1.2045955629335497e-154	Astrocytes
Usp53	1.2352878740164428e-156	1.1147882660455912	0.35	0.151	4.162426020285805e-152	Astrocytes
Tprkb	1.8947273236276444e-153	1.0096097981868297	0.308	0.119	6.384473189695711e-149	Astrocytes
Pik3r1	1.9031187673561576e-152	1.0592276881248952	0.5	0.29	6.412748998483309e-148	Astrocytes
2610035D17Rik	5.953297292066303e-152	1.1003340451545736	0.485	0.275	2.0060230555346615e-147	Astrocytes
Gm47423	4.1593084029984784e-151	1.1154478855774275	0.424	0.217	1.4015205594743672e-146	Astrocytes
Znrf3	3.7488317480854645e-142	1.060790051642479	0.457	0.259	1.263206345834878e-137	Astrocytes
Sumo1	2.790443841832169e-137	1.0147784785138636	0.612	0.463	9.402679569437677e-133	Astrocytes
Ghr	9.982492846677619e-135	1.0734691403792684	0.494	0.297	3.3637007896164905e-130	Astrocytes
Ttyh3	1.3803349969290652e-134	1.0011383279487946	0.384	0.193	4.651176805652178e-130	Astrocytes
Ahcyl1	9.559116261425271e-132	1.0150049900324296	0.589	0.449	3.2210398154498593e-127	Astrocytes
Efr3b	1.0286176648627558e-131	1.0498651283010338	0.533	0.363	3.466030083521542e-127	Astrocytes
Hacd2	1.4691820106082522e-124	1.1217010634080986	0.436	0.259	4.9505557029455665e-120	Astrocytes
Add3	1.7638997679770425e-117	1.0231681575089286	0.483	0.31	5.943636658175443e-113	Astrocytes
Hsp90ab1	0	2.020513676283169	0.953	0.923	0	Blood cells
Calm1	0	1.9597662705761714	0.955	0.937	0	Blood cells
Camk1d	5.133521895227893e-297	1.6494147257114533	0.914	0.937	1.7297915378159908e-292	Blood cells
Cst3	1.7466469327549482e-296	1.9177697838222576	0.903	0.892	5.885501504611074e-292	Blood cells
Cox4i1	2.1867429946885907e-281	1.79134	0.89	0.888	7.368449194902675e-277	Blood cells
Calm2	3.5079741243191854e-273	1.6974207908412722	0.877	0.91	1.1820469609305927e-268	Blood cells
Atp6v0c	1.4713980715250106e-270	1.7844800718923621	0.871	0.875	4.958022941810675e-266	Blood cells
Tmsb4x	1.676770299527484e-268	1.8205556681002513	0.871	0.88	5.65004520128781e-264	Blood cells
Apoe	1.0870763635165883e-253	1.7217193524126055	0.878	0.887	3.663012514505496e-249	Blood cells
Fth1	8.182312301501769e-253	1.6228851758608904	0.884	0.903	2.757111953114036e-248	Blood cells
Hspa8	6.451519597901696e-251	1.8216378628294372	0.852	0.859	2.1739040437089552e-246	Blood cells
Ppia	8.319461943823219e-247	1.8525234169558304	0.843	0.846	2.803325896590672e-242	Blood cells
Rtn1	1.997288252932086e-226	1.4277532157173938	0.867	0.94	6.730062497079957e-222	Blood cells
Hsp90aa1	5.215437651996237e-226	2.022098676066139	0.806	0.761	1.7573938712166519e-221	Blood cells
Ttr	1.4891824158848925e-220	1.8837606957642685	0.817	0.765	5.0179490685657336e-216	Blood cells
Atp1b1	6.617675768436814e-219	1.810428218289049	0.81	0.82	2.2298920269324687e-214	Blood cells
Gapdh	4.581418169938398e-214	1.981980791149922	0.79	0.737	1.5437546665424428e-209	Blood cells
mt-Co3	2.6113348033799874e-211	1.4053804971095407	0.866	0.905	8.799153753469206e-207	Blood cells
Cmss1	2.1099872894260164e-202	1.8696196842355168	0.801	0.824	7.109813170449904e-198	Blood cells
Cox8a	1.1220032697191609e-190	1.628179970746257	0.812	0.838	3.780702217645685e-186	Blood cells
Actb	1.1789195375072092e-186	1.813932645829139	0.777	0.757	3.9724872735842924e-182	Blood cells
Rplp1	9.994381616126187e-186	1.7696188918134501	0.798	0.814	3.36770682936988e-181	Blood cells
Ubb	1.293611286208287e-175	1.6139594860123125	0.789	0.821	4.358952590007444e-171	Blood cells
Chchd2	6.011380087435883e-169	1.716970906092612	0.776	0.787	2.025594634262395e-164	Blood cells
Nrgn	2.225586096048154e-162	1.7584336870480066	0.755	0.756	7.499334909243859e-158	Blood cells
Pcsk1n	4.818428256084314e-151	1.6196003716149132	0.758	0.792	1.6236175851701705e-146	Blood cells
Rps8	9.809941688271969e-151	1.7457791161831637	0.753	0.769	3.3055579512801225e-146	Blood cells
Ndufa4	3.087126678409697e-150	1.7106820716289413	0.751	0.768	1.0402382055569316e-145	Blood cells
Aldoa	1.0490401446240901e-144	1.7239572615723238	0.74	0.764	3.534845671325334e-140	Blood cells
Scg5	2.7284250841952724e-142	1.6672471804208122	0.742	0.795	9.193701163704389e-138	Blood cells
Rps29	6.556652684361179e-127	1.7260334224147327	0.71	0.714	2.209329688522343e-122	Blood cells
Cox6c	2.0260559269353525e-125	1.7216032357267794	0.717	0.744	6.826998051401364e-121	Blood cells
Stmn3	4.448564647573714e-123	1.4915194672295486	0.731	0.8	1.4989883436464386e-118	Blood cells
Slc25a4	7.842570197667714e-123	1.6086047587244834	0.718	0.777	2.642632453806113e-118	Blood cells
Tuba1a	3.9889212532246066e-116	1.5982025959666886	0.702	0.729	1.3441069054865634e-111	Blood cells
Rpl13	1.4385360989159773e-112	1.5269531216011734	0.723	0.79	4.847291238907277e-108	Blood cells
Fau	9.322037701712257e-109	1.6290999848458445	0.701	0.733	3.1411538239689624e-104	Blood cells
Rpl19	4.8843674171804126e-107	1.6048569467183715	0.686	0.703	1.6458364448931118e-102	Blood cells
Dynll1	1.6719231292052378e-106	1.6507867323789092	0.683	0.703	5.633712176169969e-102	Blood cells
Tpt1	5.887995493212375e-105	1.7386278626373883	0.666	0.661	1.9840189613928418e-100	Blood cells
Rpl41	5.216283585596567e-97	1.5948020411412114	0.679	0.723	1.757678917002619e-92	Blood cells
Olfm1	2.3980659063165728e-91	1.7354168175160298	0.642	0.656	8.080522877924324e-87	Blood cells
Sst	2.919731329539058e-91	1.7868729328554203	0.615	0.569	9.83832668801481e-87	Blood cells
Ckb	1.883040955178828e-89	1.3932810058547243	0.68	0.747	6.345094802570579e-85	Blood cells
Mt3	3.5289015342549575e-88	1.6157053864024498	0.652	0.672	1.1890986609825504e-83	Blood cells
Tubb2a	8.958752204442531e-88	1.6887571564701096	0.647	0.678	3.0187411428089555e-83	Blood cells
Rpl38	1.439308097032423e-86	1.6473054166125622	0.64	0.655	4.8498925637604526e-82	Blood cells
Rpl23	3.362589684074407e-83	1.594949081188564	0.638	0.654	1.1330582199457122e-78	Blood cells
Rpl37	1.2708925257094555e-80	1.5829696892598775	0.642	0.667	4.282399454630581e-76	Blood cells
Rpl3	1.8532005142068418e-80	1.5974871379569107	0.629	0.64	6.244544452671375e-76	Blood cells
mt-Co1	4.7246472799838015e-80	1.3492818886734348	0.672	0.748	1.5920171474633418e-75	Blood cells
Rps21	1.3618777774990773e-79	1.5720892429904563	0.642	0.681	4.588983359060891e-75	Blood cells
Eef1a1	1.8677834605077177e-77	1.5996273114223682	0.635	0.682	6.293683148526806e-73	Blood cells
Cck	1.1409223284445298e-74	1.5981285563535534	0.614	0.623	3.844451877926688e-70	Blood cells
Rps24	4.6241718054165895e-74	1.602751188146991	0.629	0.662	1.558160931553174e-69	Blood cells
Scg2	2.8716933944163724e-73	1.797334138994462	0.562	0.504	9.676458061825409e-69	Blood cells
Gnas	1.9090556189244866e-71	1.2321608866675406	0.68	0.823	6.43275381352795e-67	Blood cells
Cox5a	3.0354782337030604e-69	1.5336818736512634	0.617	0.657	1.0228347456285832e-64	Blood cells
Cox7c	1.5237820078308145e-68	1.5193164559346664	0.631	0.701	5.1345358535867126e-64	Blood cells
Rpl27a	5.122404401024742e-68	1.5235449875278633	0.629	0.695	1.726045386969297e-63	Blood cells
Cox6b1	3.720261958664787e-67	1.6821989670010338	0.585	0.577	1.2535794695916866e-62	Blood cells
Rpl24	6.537681199764747e-67	1.6197059686104986	0.607	0.636	2.2029370570727294e-62	Blood cells
mt-Co2	6.381519664454474e-66	1.318369643437705	0.639	0.707	2.1503168661345797e-61	Blood cells
Hint1	9.83890660456064e-66	1.5686767900915286	0.604	0.635	3.315317969472753e-61	Blood cells
Itm2b	7.088393534863898e-65	1.495949497055339	0.616	0.68	2.388505085507739e-60	Blood cells
Bex2	7.4510033098571705e-65	1.5647911718157619	0.599	0.629	2.510690075289472e-60	Blood cells
Rps27a	1.987662979947708e-64	1.5249585022565093	0.613	0.656	6.697629177231797e-60	Blood cells
Rpl37a	2.292309753182993e-63	1.5487559612271742	0.593	0.612	7.724166944325413e-59	Blood cells
Ly6h	4.0944520570857435e-61	1.011164047760429	0.688	0.871	1.3796665651556121e-56	Blood cells
Rpsa	5.44846957882487e-60	1.5794000828833084	0.587	0.61	1.835916309280828e-55	Blood cells
Basp1	1.0480608930864504e-59	1.4341929820424113	0.625	0.744	3.531545985344104e-55	Blood cells
Rps14	2.0418674720716608e-59	1.6199157957456516	0.573	0.584	6.880276633892668e-55	Blood cells
Rps10	9.328356583273676e-59	1.5657251717385399	0.581	0.596	3.143283034299898e-54	Blood cells
Eif1	7.53616039386347e-58	1.409927063970748	0.613	0.693	2.5393846063162347e-53	Blood cells
Cox7a2	1.5364662367600937e-56	1.5426197059208329	0.591	0.641	5.1772766313868115e-52	Blood cells
Elob	6.034677373123377e-56	1.5901135709991117	0.559	0.558	2.0334448876476532e-51	Blood cells
Mif	6.578918587440663e-56	1.6070205914018947	0.559	0.56	2.216832407224006e-51	Blood cells
Rpl35a	8.215291255427891e-56	1.5641744842372551	0.564	0.566	2.768224541428982e-51	Blood cells
Ywhah	1.0399015122678647e-55	1.650987621396126	0.546	0.537	3.5040521357377965e-51	Blood cells
Uchl1	2.865872880732682e-55	1.6085543862797407	0.558	0.568	9.656845258916846e-51	Blood cells
Atpif1	4.263422075891492e-55	1.3817626643603997	0.613	0.709	1.4366027026923972e-50	Blood cells
Atp5md	6.921128530666123e-55	1.5663783297438247	0.568	0.589	2.332143469693257e-50	Blood cells
Chgb	8.919776366527767e-54	1.7829866599191821	0.51	0.464	3.0056078444651965e-49	Blood cells
Atp5h	1.3813338622256219e-53	1.5741197214670388	0.583	0.635	4.6545425821554556e-49	Blood cells
Actg1	7.990843449569631e-53	1.5859784026645067	0.546	0.546	2.6925946087669828e-48	Blood cells
Ywhae	4.737697895363357e-51	1.454384406332626	0.585	0.666	1.5964146828216367e-46	Blood cells
Camk2n1	9.78279318245482e-50	1.6426718249908825	0.52	0.5	3.296409990759976e-45	Blood cells
Mdh1	1.4383991387634332e-49	1.5122189579122565	0.575	0.644	4.8468297379772647e-45	Blood cells
Rpl8	6.3928419603570676e-49	1.5300257976033949	0.556	0.582	2.1541320269619174e-44	Blood cells
Ndufb9	3.6374205137492136e-47	1.4517489953441367	0.564	0.608	1.225665216312935e-42	Blood cells
Nme7	5.694871608646152e-47	1.431993014340724	0.595	0.724	1.9189439372494072e-42	Blood cells
Rpl28	9.934608443943329e-47	1.5567214165806595	0.539	0.551	3.347565661271144e-42	Blood cells
Rpl11	1.846679974209775e-46	1.470407416427293	0.566	0.618	6.222572841097259e-42	Blood cells
Cox7b	3.3599276653717916e-46	1.5068048274728605	0.564	0.618	1.1321612261236788e-41	Blood cells
Rpl9	4.542163279272246e-46	1.5031741505968126	0.562	0.61	1.530527338583576e-41	Blood cells
Rps7	2.2697571420598422e-45	1.5446132353200097	0.548	0.581	7.648173665884844e-41	Blood cells
Rps15	2.5453968344912484e-45	1.5777415138661355	0.529	0.538	8.57696917350171e-41	Blood cells
Bsg	2.6578931693876127e-45	1.5311435414019081	0.519	0.512	8.9560368235685e-41	Blood cells
Chchd10	4.788196681747151e-45	1.60092	0.536	0.547	1.61343075388152e-40	Blood cells
Rpl32	6.551389909013567e-45	1.5345161352169714	0.534	0.544	2.2075563437412114e-40	Blood cells
Pcp4	7.441417197253008e-45	1.5357867405328707	0.563	0.625	2.507459938786374e-40	Blood cells
Rpl6	7.392357604446792e-44	1.5075973509857739	0.572	0.659	2.490928818394391e-39	Blood cells
Atp5g1	2.001730072788218e-43	1.5000131850460208	0.546	0.586	6.745029653267179e-39	Blood cells
Stmn1	1.605815612835277e-42	1.5787990968644912	0.526	0.547	5.410956289009749e-38	Blood cells
Stmn2	2.9414609981443364e-42	1.4871409033197573	0.566	0.657	9.911546979347157e-38	Blood cells
Dnaja1	6.323690155272043e-42	1.522717468300618	0.549	0.614	2.1308306347204675e-37	Blood cells
Ndufs5	9.727507819759664e-41	1.5070217481257222	0.532	0.563	3.2777810349462166e-36	Blood cells
Rps23	2.777496352826522e-39	1.4924159244078823	0.519	0.534	9.359051710484249e-35	Blood cells
Ndufa13	1.4058791238138597e-38	1.4484171494598779	0.526	0.556	4.737250295603182e-34	Blood cells
Uqcrq	1.8599124538967353e-38	1.590025036865926	0.514	0.532	6.2671610046504395e-34	Blood cells
Rpl30	3.9916426155391844e-38	1.460786343390968	0.535	0.58	1.3450238957320835e-33	Blood cells
Rpl34	2.1834106840395693e-37	1.4342258082981212	0.514	0.534	7.357220640939732e-33	Blood cells
6330403K07Rik	4.719168557697457e-37	1.532163092189487	0.52	0.564	1.590171037201735e-32	Blood cells
Rps25	5.441876628371832e-37	1.5588894877928006	0.475	0.455	1.8336947486961723e-32	Blood cells
Ndn	4.675885786595793e-36	1.5718597376757177	0.475	0.46	1.5755864746513184e-31	Blood cells
Rab3a	1.8623992750745855e-35	1.5697820808301746	0.481	0.479	6.275540597291323e-31	Blood cells
Sub1	3.783682860652925e-35	1.4661133242099227	0.497	0.51	1.2749497767256096e-30	Blood cells
Rplp2	9.895207797006176e-35	1.4851765423410694	0.512	0.547	3.334289219279201e-30	Blood cells
Atp6v1e1	3.642220617154467e-34	1.5076597507073326	0.507	0.544	1.2272826591563691e-29	Blood cells
Rpl21	5.529572413540338e-34	1.4859396208331699	0.501	0.526	1.8632447204665523e-29	Blood cells
Ywhab	5.4038327122667335e-33	1.6078282629785223	0.47	0.469	1.8208754707253986e-28	Blood cells
Ndfip1	5.678977933747032e-33	1.0153353344981397	0.613	0.833	1.9135884045554e-28	Blood cells
Rpl15	6.573940708794879e-33	1.4600870823290302	0.527	0.598	2.215155061235522e-28	Blood cells
Pebp1	8.416860122964837e-33	1.280842890754358	0.553	0.666	2.8361451870342313e-28	Blood cells
Caly	1.8444264020995647e-31	1.419652907315339	0.51	0.569	6.2149792045146934e-27	Blood cells
Atp5b	3.9035676343540636e-31	1.4267944892423152	0.507	0.562	1.3153461500719453e-26	Blood cells
Rps9	4.004029547839715e-31	1.5051471704323967	0.455	0.442	1.3491977964400705e-26	Blood cells
Atp1a3	2.5223434820072508e-30	1.2722222836957455	0.552	0.701	8.499288596971632e-26	Blood cells
Ptgds	4.024214361382861e-30	1.2456239323550022	0.497	0.512	1.355999271211569e-25	Blood cells
Rpl18a	4.451081186278199e-30	1.6002428113670721	0.445	0.429	1.4998363165283019e-25	Blood cells
Atp5l	6.67230313292525e-30	1.4202324023361461	0.53	0.619	2.248299263670492e-25	Blood cells
Cox5b	7.563113747898848e-30	1.5675867851318883	0.439	0.418	2.548466808491996e-25	Blood cells
Rps3a1	8.69031069793963e-30	1.4628560648662943	0.506	0.558	2.9282870927777373e-25	Blood cells
Atp5g3	1.1972087993661336e-29	1.474097681743922	0.462	0.464	4.034114770344124e-25	Blood cells
Rps19	1.6703947956811154e-29	1.471659920690257	0.474	0.488	5.628562303527086e-25	Blood cells
Nap1l5	4.0104435142386645e-29	1.5809711179823842	0.442	0.431	1.3513590465578605e-24	Blood cells
Atp5j	9.003415812813228e-29	1.4889814903359857	0.487	0.525	3.033790992285545e-24	Blood cells
Hspa5	1.3098105497870123e-28	1.602818197555563	0.462	0.475	4.413537628562316e-24	Blood cells
Pgrmc1	2.342571542847472e-28	1.4943480217511913	0.445	0.439	7.893529070778842e-24	Blood cells
Pnma8b	4.0779155222790705e-28	1.5649843106431431	0.441	0.434	1.3740944143871555e-23	Blood cells
C1ql3	4.517837675684576e-28	1.3486033062875773	0.513	0.58	1.5223305831986748e-23	Blood cells
Cox6a1	1.0937146716179339e-27	1.6052200476854765	0.434	0.422	3.68538095748379e-23	Blood cells
Rps12	2.3060649508129588e-26	1.457290657843711	0.478	0.518	7.770516458259346e-22	Blood cells
Rpl10a	4.527241693800332e-26	1.507213790905024	0.432	0.423	1.52549936114296e-21	Blood cells
Penk	7.143969818033774e-26	1.5255451232321386	0.329	0.256	2.4072320698846603e-21	Blood cells
Mt1	3.416274851939962e-25	1.4278441683782817	0.457	0.469	1.1511479741096896e-20	Blood cells
Rpl27	3.6364966284605727e-25	1.5679320805798431	0.442	0.45	1.2253539039260745e-20	Blood cells
Atp5o	4.903723876274707e-25	1.4738718773108106	0.471	0.509	1.6523587973495254e-20	Blood cells
Rps5	8.570425537394016e-25	1.4872831136631957	0.442	0.449	2.887890589080288e-20	Blood cells
Tspyl4	1.0884420715427901e-24	1.4746357045305367	0.453	0.479	3.6676144042705854e-20	Blood cells
Bex3	1.1479962882660022e-24	1.5090440930987115	0.459	0.489	3.868288292941121e-20	Blood cells
Gap43	1.850526400342027e-24	1.244044203633615	0.544	0.704	6.235533758592494e-20	Blood cells
Rpl17	2.7458159129418747e-24	1.5073139068730885	0.456	0.482	9.25230130024894e-20	Blood cells
Rnasek	3.561691097090718e-24	1.445935747594345	0.452	0.471	1.2001474320756882e-19	Blood cells
Rps11	4.296982729156446e-24	1.450582691489618	0.47	0.51	1.447911300416556e-19	Blood cells
Rps6	4.971234732314406e-24	1.5300642656008074	0.357	0.304	1.6751072554006623e-19	Blood cells
Rps17	5.113867894823621e-23	1.460149697601704	0.434	0.443	1.7231689258397675e-18	Blood cells
Rps13	6.315456940728588e-23	1.391761293707127	0.494	0.572	2.128056370747905e-18	Blood cells
Thra	6.389712858064958e-23	1.2109581171106327	0.529	0.671	2.153077644653568e-18	Blood cells
Uqcr11	1.5481448860763814e-22	1.4239774244433503	0.464	0.508	5.216629008122975e-18	Blood cells
Fkbp3	1.7501473279279193e-22	1.5554288475629818	0.44	0.461	5.897296436185917e-18	Blood cells
Rps16	6.986076015705176e-22	1.4662924268206252	0.47	0.525	2.354028174252016e-17	Blood cells
Atp5j2	8.2322666771360945e-22	1.3378059364586365	0.484	0.559	2.7739445795277783e-17	Blood cells
Serinc1	2.206121786402583e-21	1.4751393859431146	0.41	0.408	7.433747971462143e-17	Blood cells
Lars2	3.7041519003404336e-21	1.614049240667597	0.401	0.397	1.2481510243387124e-16	Blood cells
Rpl18	4.8637771003720804e-21	1.4282534520284358	0.419	0.423	1.6388983317413762e-16	Blood cells
Rps26	5.0836950705793275e-21	1.4592055957167114	0.452	0.491	1.7130018909824103e-16	Blood cells
Nme1	7.778295916418998e-21	1.4572068372727143	0.45	0.492	2.6209745919965454e-16	Blood cells
Uqcrh	8.244433836731217e-21	1.4221096980404122	0.466	0.526	2.778044425624951e-16	Blood cells
Pgam1	9.706116836847428e-21	1.367315312364743	0.433	0.453	3.2705731293441093e-16	Blood cells
Rpl13a	1.7313705239498828e-20	1.4623287634537843	0.412	0.415	5.834026117501525e-16	Blood cells
Sparcl1	2.6216810808037013e-20	1.220217119705868	0.442	0.446	8.834016569876152e-16	Blood cells
Scd2	8.036085673340825e-20	1.3948590119038062	0.461	0.512	2.7078394284889243e-15	Blood cells
Naca	9.868350723456993e-20	1.3656284622153814	0.463	0.525	3.3252394597760685e-15	Blood cells
Rps4x	1.434553979523132e-19	1.4747726451370236	0.421	0.437	4.833873089401146e-15	Blood cells
Rps15a	2.075797874258328e-19	1.3876359268727856	0.459	0.518	6.9946085171008626e-15	Blood cells
Atp5k	2.240320943236264e-19	1.4182290654021865	0.438	0.472	7.548985450328915e-15	Blood cells
Tuba1b	4.697766481811857e-19	1.4346437829896541	0.368	0.344	1.5829593937113234e-14	Blood cells
Rps20	1.147259699584523e-18	1.3462166368482564	0.468	0.54	3.865806283720009e-14	Blood cells
Myl6	2.0750029526254007e-18	1.3930462892801878	0.447	0.498	6.99192994916655e-14	Blood cells
Rtn4	2.19438779955689e-18	1.0504167373956825	0.542	0.738	7.394209129386896e-14	Blood cells
Rpl12	4.073332898974122e-18	1.5245736563110845	0.394	0.397	1.37255025363832e-13	Blood cells
Ndufa5	5.333263620284728e-18	1.398866419348649	0.432	0.466	1.797096509491142e-13	Blood cells
Snrpn	7.77410667189752e-18	1.0951332857360825	0.521	0.693	2.6195629841625883e-13	Blood cells
Rpl23a	1.2643086822354886e-17	1.455708132726651	0.383	0.377	4.2602145356607025e-13	Blood cells
Uqcrb	1.5956202524116496e-17	1.4250792324688648	0.428	0.464	5.376602002526294e-13	Blood cells
Rpl26	2.0784850787148807e-17	1.4277245143081059	0.354	0.329	7.003663321237661e-13	Blood cells
mt-Atp6	2.444547373426277e-17	1.1270487195882852	0.514	0.649	8.237146829497183e-13	Blood cells
Rps3	5.869450578058944e-17	1.4309291932386303	0.388	0.39	1.9777700667827418e-12	Blood cells
Psmb5	1.1496215623009593e-16	1.4035495674701863	0.349	0.326	3.8737648163293125e-12	Blood cells
Smdt1	1.1509610145779595e-16	1.4004784793275011	0.399	0.411	3.878278234721892e-12	Blood cells
Slc25a3	3.8638070558141046e-16	1.284042128727923	0.48	0.597	1.3019484255271207e-11	Blood cells
Rpl36	6.451199916809671e-16	1.354983630605461	0.434	0.487	2.1737963239681865e-11	Blood cells
Ndufb11	6.516105928287578e-16	1.4152539464996083	0.369	0.362	2.1956670535957824e-11	Blood cells
Pkm	6.904515751494036e-16	1.3631292661389316	0.437	0.498	2.32654562762343e-11	Blood cells
Rpl7	2.4408028741491993e-15	1.396437803349467	0.374	0.377	8.224529364733141e-11	Blood cells
Ldhb	3.144189291460288e-15	1.3617593600924347	0.428	0.48	1.0594660236504586e-10	Blood cells
Tpi1	4.936097829359365e-15	1.372915731074357	0.4	0.428	1.6632675245809316e-10	Blood cells
Ncl	1.3319903476481834e-14	1.4947016033191607	0.373	0.382	4.4882746754353186e-10	Blood cells
Tubb5	1.4864089293494834e-14	1.463163100249724	0.375	0.384	5.008603528336019e-10	Blood cells
Atp5pb	5.657991124881266e-14	1.2560115490921717	0.443	0.526	1.9065166894399914e-9	Blood cells
Arl6ip1	6.631644500869181e-14	1.382729690898105	0.404	0.442	2.2345989310128795e-9	Blood cells
Ndufa6	6.796905576387316e-14	1.4392849631420803	0.399	0.434	2.29028530301947e-9	Blood cells
Ndufb8	8.753103341239489e-14	1.3464503392204297	0.413	0.459	2.949445701864058e-9	Blood cells
Nefl	1.260756372224825e-13	1.4448626301985943	0.329	0.312	4.24824467184877e-9	Blood cells
Oaz1	1.8405611413454555e-13	1.3121808095716019	0.445	0.533	6.201954821877647e-9	Blood cells
Eef1b2	2.2730214212069078e-13	1.3333666329516534	0.367	0.374	7.659172980898796e-9	Blood cells
Calm3	3.77784550213749e-13	1.3826774365027357	0.408	0.456	1.2729828204002486e-8	Blood cells
Rpl22l1	3.866228445812968e-13	1.395829164606423	0.41	0.46	1.3027643371011377e-8	Blood cells
Rpl36a	8.310254865001934e-13	1.3771429317121706	0.342	0.335	2.8002234793110516e-8	Blood cells
Mdh2	8.572929288263802e-13	1.3539421777185618	0.387	0.417	2.888734252973371e-8	Blood cells
Rpl39	9.703084554381673e-13	1.3479260634283987	0.387	0.416	3.269551371444449e-8	Blood cells
H2az1	1.1849719528524777e-12	1.3611717497995361	0.399	0.443	3.9928814923317085e-8	Blood cells
H3f3b	1.283072554638307e-12	1.2430137559962096	0.448	0.547	4.3234412801092396e-8	Blood cells
Ubc	1.7737085948967727e-12	1.3740798132687089	0.363	0.374	5.976688481364165e-8	Blood cells
Atp6v1f	2.571735042624379e-12	1.36173	0.368	0.385	8.665718399627108e-8	Blood cells
Cfl1	2.637488866577775e-12	1.3659175946938977	0.377	0.403	8.887282484820471e-8	Blood cells
Norad	2.7457637613803092e-12	1.4167071794529251	0.361	0.373	9.25212557034709e-8	Blood cells
Eef1a2	3.525036250332221e-12	1.4611756096880533	0.31	0.291	1.1877962149119451e-7	Blood cells
Dbi	3.662383172682806e-12	1.3700136526485958	0.394	0.431	1.2340766338671984e-7	Blood cells
Rpl10	4.909862784193928e-12	1.3375004590268786	0.307	0.285	1.654427363761986e-7	Blood cells
Morf4l1	8.02087880287578e-12	1.398941915472029	0.427	0.513	2.702715321417023e-7	Blood cells
Ptms	1.0729352881749962e-11	1.3724922218144207	0.37	0.394	3.615362747034467e-7	Blood cells
Selenow	1.0794225859893032e-11	1.3085287670520183	0.426	0.506	3.637222345749556e-7	Blood cells
Ndufs7	1.0886915782591022e-11	1.3467542869922882	0.333	0.33	3.6684551421018706e-7	Blood cells
Grcc10	1.2062854350357771e-11	1.3925839859749851	0.361	0.377	4.0646994018965545e-7	Blood cells
Dynll2	1.4855808247559594e-11	1.3343110526997575	0.343	0.346	5.005813147097681e-7	Blood cells
mt-Nd2	1.7533557161789026e-11	1.2284751385341097	0.438	0.532	5.90810742123643e-7	Blood cells
Uqcr10	2.6044735401240365e-11	1.3181404271021038	0.375	0.405	8.776034040801953e-7	Blood cells
Ndufc1	2.6993696864787962e-11	1.414086538090879	0.386	0.425	9.095796095558952e-7	Blood cells
Rpl14	3.013253366118226e-11	1.3537715509460955	0.383	0.42	1.0153458542471974e-6	Blood cells
Rabac1	3.164607147777308e-11	1.356395286609732	0.364	0.386	1.0663460245150417e-6	Blood cells
Ndufb7	7.868534568853127e-11	1.3851903145538091	0.343	0.351	2.65138140832075e-6	Blood cells
Ndufa11	1.0328711929599209e-10	1.3327054337676962	0.387	0.432	3.4803627717977495e-6	Blood cells
Ndufa3	1.3639633464162436e-10	1.283261920002054	0.276	0.248	4.5960108920841746e-6	Blood cells
Hexb	1.6494144161431057e-10	1.3773098594400253	0.346	0.359	5.557866816635809e-6	Blood cells
Gstm5	1.7979684529904008e-10	1.3320870153140743	0.298	0.281	6.058434499196454e-6	Blood cells
Eid1	3.152305336160683e-10	1.3721106206830178	0.363	0.392	1.0622008060727039e-5	Blood cells
Ndufab1	4.703790564080811e-10	1.2971421839258435	0.385	0.434	1.5849892684726703e-5	Blood cells
Resp18	1.0781977205801274e-9	1.290455304995753	0.368	0.407	3.633095039266797e-5	Blood cells
Atp6v1d	1.3244309124070214e-9	1.3917858945859922	0.364	0.402	4.462802402446699e-5	Blood cells
Npm1	1.3317387778699393e-9	1.3497456433300319	0.376	0.423	4.487426985910548e-5	Blood cells
Ndufb5	1.7339252013785268e-9	1.2791293246247797	0.37	0.41	5.842634358565084e-5	Blood cells
Tubb4b	2.1671624465740898e-9	1.330496171159782	0.37	0.412	7.302470579976053e-5	Blood cells
Atp5mpl	3.653444002451924e-9	1.329502911550187	0.334	0.349	1.2310644910662003e-4	Blood cells
Cycs	5.563908438971626e-9	1.2632924047413714	0.291	0.281	1.874814587595879e-4	Blood cells
Npy	6.075008139817289e-9	1.3700543878899083	0.269	0.25	2.0470347427928336e-4	Blood cells
Atp5d	6.6611533041456515e-9	1.2960241259758316	0.39	0.455	2.2445422173649187e-4	Blood cells
Aplp1	6.718061723053376e-9	1.1452404644321872	0.469	0.638	2.2637180782000653e-4	Blood cells
Ddx24	7.74078718483874e-9	1.168556715257466	0.472	0.652	2.6083356498032617e-4	Blood cells
Rpl31	8.218495605842925e-9	1.3612698055139067	0.326	0.339	2.769304279344832e-4	Blood cells
Tecr	8.294064856575727e-9	1.2174656290269512	0.459	0.622	2.794768094071757e-4	Blood cells
Set	8.488281739837543e-9	1.3955002498770201	0.282	0.27	2.8602114150556586e-4	Blood cells
Ptn	9.511700601628882e-9	1.1742454446738497	0.452	0.577	3.205062634724868e-4	Blood cells
Map1lc3a	1.3295273423650366e-8	1.2968437390256677	0.33	0.347	4.479975332833227e-4	Blood cells
Atp5e	1.7647042468243704e-8	1.292308219546388	0.376	0.43	5.946347430099398e-4	Blood cells
Sec62	2.534887215659272e-8	1.2655189176029078	0.442	0.58	8.541555961885483e-4	Blood cells
mt-Nd4	2.562929063722793e-8	1.1251143061222022	0.414	0.507	8.636045773120323e-4	Blood cells
Gpx4	2.6005818879874032e-8	1.2490118401861228	0.368	0.417	8.762920729762354e-4	Blood cells
Tuba4a	2.751814320816897e-8	1.2719199211335042	0.29	0.284	9.272513535424616e-4	Blood cells
C1qtnf4	3.909018847896338e-8	1.2653847414322081	0.415	0.518	0.00131718	Blood cells
Ndufb6	5.1699392306169116e-8	1.2834745656517899	0.283	0.276	0.00174206	Blood cells
Spcs1	5.277485081752417e-8	1.2687685526485875	0.234	0.207	0.0017783	Blood cells
Prdx5	5.378481004423531e-8	1.254016436370705	0.349	0.385	0.00181233	Blood cells
Psap	6.027015823761527e-8	1.2333012275321926	0.426	0.546	0.00203086	Blood cells
Scand1	6.416221321684383e-8	1.2374663296633983	0.273	0.26	0.00216201	Blood cells
Hsp90b1	7.867062268008743e-8	1.3452776790320222	0.385	0.461	0.00265089	Blood cells
Itm2c	1.1830279890713272e-7	1.2600824615794326	0.32	0.338	0.00398633	Blood cells
Atxn7l3b	1.625150950727596e-7	1.3388512537760122	0.317	0.334	0.00547611	Blood cells
Rps28	1.723098739077883e-7	1.324982209767291	0.375	0.44	0.00580615	Blood cells
Aldoc	2.0324212044480657e-7	1.2316080291907618	0.316	0.33	0.00684845	Blood cells
Ndufb10	2.1733218778970443e-7	1.317024600606347	0.35	0.393	0.00732323	Blood cells
Psmb6	2.23699557308282e-7	1.2423526498881707	0.273	0.265	0.00753778	Blood cells
Slc25a5	2.339352901785821e-7	1.2856932556595768	0.271	0.264	0.00788268	Blood cells
Syt11	2.4121888513115756e-7	1.3424319230006663	0.406	0.511	0.00812811	Blood cells
Ndufs6	2.57486608958564e-7	1.2850082136988101	0.283	0.281	0.00867627	Blood cells
Septin7	3.2528451439477985e-7	1.1221261531955942	0.447	0.59	0.010960786997046501	Blood cells
Clu	3.77458566535283e-7	1.294285413891062	0.326	0.351	0.012718843857972895	Blood cells
Rpl5	9.236144877584322e-7	1.3062709869949694	0.336	0.376	0.0311221	Blood cells
Nedd8	9.586453767233681e-7	1.2148963307111043	0.37	0.437	0.0323025	Blood cells
Srp14	1.1427578481199512e-6	1.218353698801909	0.369	0.437	0.0385064	Blood cells
Pfdn5	1.1641254563504245e-6	1.2506724569366638	0.351	0.401	0.039226371377183905	Blood cells
Tomm7	1.1810073952472631e-6	1.2461329365570486	0.269	0.266	0.039795225190251776	Blood cells
Tmsb10	1.2675227528422467e-6	1.2433602226170077	0.338	0.376	0.0427104	Blood cells
Ndufc2	1.3469633569734427e-6	1.2771131140272605	0.345	0.39	0.045387277276577126	Blood cells
Fkbp1a	1.3632457143020879e-6	1.2542098457189885	0.393	0.49	0.045935927589123154	Blood cells
Bnc2	0	3.600300363366264	0.44	0.005	0	Epithelial cells
Slc47a1	0	3.1603320766949676	0.407	0.002	0	Epithelial cells
Rbm47	0	2.3238255834708434	0.44	0.007	0	Epithelial cells
Tbx15	0	2.1329122118946886	0.363	0.004	0	Epithelial cells
2610307P16Rik	0	2.0514564870184593	0.538	0.01	0	Epithelial cells
Slc26a7	0	1.989173613301114	0.352	0.003	0	Epithelial cells
Tmem72	0	1.919586998756883	0.319	0.003	0	Epithelial cells
Tspan11	0	1.6688168923082456	0.33	0.002	0	Epithelial cells
Gm56880	0	1.6105472482655736	0.374	0.001	0	Epithelial cells
Prdm6	0	1.5662216224975631	0.253	0.002	0	Epithelial cells
Ccdc170	0	1.5449634198611164	0.341	0.003	0	Epithelial cells
Otx2	0	1.4863983484954628	0.297	0.001	0	Epithelial cells
Car13	0	1.441607368190722	0.242	0.001	0	Epithelial cells
C230072F16Rik	0	1.3496652048371192	0.286	0.001	0	Epithelial cells
2010001K21Rik	0	1.3168275585473226	0.286	0.002	0	Epithelial cells
Dnai3	0	1.126581560093074	0.242	0.002	0	Epithelial cells
Kcnk5	0	1.0640983452939796	0.198	0.001	0	Epithelial cells
Gm48447	0	1.026558943750026	0.198	0	0	Epithelial cells
Hoatz	4.314244421808825e-293	1.1955903273971975	0.264	0.004	1.4537278003727016e-288	Epithelial cells
Odad1	6.5431033537185e-249	1.6038190572615505	0.385	0.01	2.204764106068986e-244	Epithelial cells
Gmnc	4.461565144964374e-240	2.0258431584205465	0.352	0.009	1.5033689912471954e-235	Epithelial cells
Clec2d	3.9311433917174153e-233	1.8308418219812073	0.341	0.008	1.3246380772731002e-228	Epithelial cells
Slc4a5	2.1338176483339267e-232	1.1018018593086027	0.242	0.004	7.190111947826e-228	Epithelial cells
Col4a3	7.814525568981467e-231	1.1769898800075984	0.253	0.004	2.6331825357239952e-226	Epithelial cells
Odad2	1.5843015434409026e-194	1.4202412254357182	0.264	0.006	5.338462480778466e-190	Epithelial cells
Lmx1a	9.233009314222904e-190	1.0087413436844443	0.198	0.003	3.11115481852055e-185	Epithelial cells
Ttc21a	1.8963933529729878e-187	1.3592663257624809	0.308	0.009	6.39008704217778e-183	Epithelial cells
Adamtsl3	5.919060834028831e-178	3.003864138307779	0.418	0.017	1.9944867386343547e-173	Epithelial cells
Mdfic	6.3178760707404635e-177	1.1922935722063992	0.22	0.004	2.1288715207967064e-172	Epithelial cells
Otx2os1	6.813409491924914e-172	3.397441417105958	0.352	0.013	2.2958464623990188e-167	Epithelial cells
Spag16	1.767906762875717e-169	2.9934039749448953	0.516	0.029	5.957138628186016e-165	Epithelial cells
Mecom	2.1546331130894931e-165	1.9388140916858367	0.363	0.014	7.260251737866356e-161	Epithelial cells
Drc7	7.727347884563523e-165	1.5475458202637289	0.352	0.013	2.6038071431825245e-160	Epithelial cells
Ccdc146	6.332206551307035e-160	1.768099642780175	0.33	0.012	2.1337003195284183e-155	Epithelial cells
Bmp6	1.9881520170383997e-156	2.3046606243297227	0.505	0.029	6.699277036612591e-152	Epithelial cells
Tmem212	9.591439327842018e-145	1.5579835805737416	0.187	0.004	3.231931395909646e-140	Epithelial cells
Dock5	6.027448016812564e-139	2.1428361851053905	0.429	0.023	2.0310088837451616e-134	Epithelial cells
Slc16a9	1.608640721629616e-135	1.39029	0.231	0.007	5.420475775603154e-131	Epithelial cells
Gm10714	1.1156284746630875e-130	1.4661536565892737	0.176	0.004	3.75922170822474e-126	Epithelial cells
Spef2	2.2842857820691575e-130	2.0516120169545555	0.451	0.028	7.697129371260234e-126	Epithelial cells
Chil1	4.066897439153564e-124	1.1151138611709779	0.22	0.007	1.370381761097185e-119	Epithelial cells
Slc13a4	2.850679077107319e-122	1.1277	0.209	0.006	9.605648218220821e-118	Epithelial cells
Gm29266	2.981214617760597e-122	1.3232332443280361	0.33	0.016	1.0045500776006108e-117	Epithelial cells
Spata17	1.3338244535144507e-115	1.6218395850996403	0.363	0.02	4.494454878562293e-111	Epithelial cells
Gm29571	5.467398054907561e-113	1.5835845127811272	0.297	0.014	1.842294448581652e-108	Epithelial cells
Pdgfd	9.40997887613719e-111	1.5288423781008902	0.374	0.022	3.1707864821031875e-106	Epithelial cells
Dnah6	1.5764263744768238e-110	2.243173449969948	0.505	0.042	5.311926311437105e-106	Epithelial cells
Cped1	4.896395101579283e-106	2.676637602792527	0.462	0.036	1.649889293428155e-101	Epithelial cells
F5	2.0927295967109373e-104	1.0577995445042574	0.231	0.009	7.051661649077174e-100	Epithelial cells
Shroom3	6.054093347972593e-97	1.6040144087638004	0.396	0.028	2.039987294532845e-92	Epithelial cells
Ror1	6.778843908847228e-96	2.448530621050045	0.67	0.088	2.284199243525162e-91	Epithelial cells
Wdr49	1.9333153869810117e-93	1.7051053048392224	0.176	0.006	6.514499527971218e-89	Epithelial cells
Notch2	6.195758808675298e-92	1.605353834173129	0.462	0.041	2.0877228881712285e-87	Epithelial cells
Neat1	7.001390703963576e-91	2.3605770349940367	0.747	0.109	2.3591886116075668e-86	Epithelial cells
Cfap43	4.796547877249287e-90	1.8228699895188103	0.429	0.036	1.6162447727179198e-85	Epithelial cells
Cfap299	1.3309256822219089e-87	2.7575085618318806	0.407	0.034	4.484687178814944e-83	Epithelial cells
Eya2	1.1459379918736488e-84	2.4084689209437986	0.363	0.028	3.861352657417447e-80	Epithelial cells
Ak9	2.0302908460354324e-82	1.6662316561356947	0.319	0.022	6.841268034800993e-78	Epithelial cells
Col4a4	2.4895023937650274e-80	1.1293637679440443	0.231	0.012	8.388627266030636e-76	Epithelial cells
Kl	6.807367121456249e-78	1.1453732765401756	0.242	0.013	2.2938104252458976e-73	Epithelial cells
Dnah11	3.5369476146591113e-74	1.3743467427148293	0.297	0.021	1.191809868235534e-69	Epithelial cells
Gm6260	7.479512714342767e-72	2.487965318875499	0.33	0.027	2.520296604224939e-67	Epithelial cells
Pawr	5.8611731455556196e-67	1.3054319599763142	0.286	0.021	1.9749809031264217e-62	Epithelial cells
Acss3	6.613084734131165e-66	1.1645001785340523	0.286	0.021	2.2283450320128374e-61	Epithelial cells
Adgrv1	1.218335399447524e-63	1.7041795357886522	0.396	0.043	4.1053029619783765e-59	Epithelial cells
Col9a3	6.064965231189858e-60	2.0744660057832074	0.341	0.034	2.0436506843017346e-55	Epithelial cells
Fap	8.361374193759112e-60	1.2265871472445875	0.264	0.02	2.8174486483290706e-55	Epithelial cells
Clic4	4.064653080480749e-59	2.361985646206216	0.429	0.054	1.3696255019987933e-54	Epithelial cells
Phldb2	8.325227279149459e-57	1.2816238159615785	0.352	0.037	2.8052685839822016e-52	Epithelial cells
Trabd2b	1.866130550457816e-56	2.556496705749286	0.407	0.052	6.288113502822657e-52	Epithelial cells
Nxn	1.6243811707788875e-54	2.2241950283215006	0.637	0.132	5.473514793056539e-50	Epithelial cells
Gulp1	1.8707298788812756e-54	2.1303869095430032	0.659	0.142	6.303611399878347e-50	Epithelial cells
Eva1c	4.6247368674281566e-54	1.2515997345159713	0.264	0.022	1.5583513348485918e-49	Epithelial cells
Calml4	4.4322193690253605e-52	1.0078023275803638	0.242	0.02	1.4934806385867854e-47	Epithelial cells
Pdlim5	5.116880640778231e-52	1.4903804484470637	0.505	0.082	1.7241841007166327e-47	Epithelial cells
Tgfbr2	9.609853957180896e-52	1.0370685627080394	0.308	0.031	3.238136389411675e-47	Epithelial cells
Lrrc23	2.1445735653800252e-51	1.3944052503651556	0.319	0.034	7.226355085904533e-47	Epithelial cells
Fhad1	3.530786437416469e-51	1.548266919257106	0.363	0.044	1.1897337979518533e-46	Epithelial cells
Egfr	1.930662089814256e-50	1.6687467076872602	0.484	0.074	6.505558977838117e-46	Epithelial cells
Ezr	3.9288349760423334e-50	1.131654022784855	0.33	0.037	1.3238602335272246e-45	Epithelial cells
Clic6	5.643774728232891e-50	1.595906529767417	0.297	0.031	1.901726332425355e-45	Epithelial cells
Cdc14a	8.035996790222657e-50	1.4242018428871652	0.33	0.037	2.7078094784334266e-45	Epithelial cells
Rad51b	1.0036933324200511e-45	1.005830123369639	0.242	0.022	3.382045052922604e-41	Epithelial cells
Dab2	1.4538407400245615e-45	1.124668880063685	0.253	0.024	4.898861757586762e-41	Epithelial cells
Zfp36l1	1.9719035320305112e-44	1.0283099557273028	0.286	0.031	6.644526141530011e-40	Epithelial cells
Gm4876	2.823064091698413e-43	1.7017288422367134	0.604	0.141	9.512596763386972e-39	Epithelial cells
Baiap2l1	1.2143184272857978e-42	1.112669139574226	0.308	0.038	4.0917673725822243e-38	Epithelial cells
Abcc4	3.075692505343005e-42	1.6746499890416588	0.396	0.063	1.036385346600379e-37	Epithelial cells
Wwtr1	8.605334013486009e-42	1.140000939406723	0.297	0.035	2.8996533491842457e-37	Epithelial cells
Msi2	1.178735599098313e-41	2.1574732570605093	0.912	0.488	3.9718674747216755e-37	Epithelial cells
Prdm16	5.917535873389081e-40	1.5970379639145356	0.341	0.048	1.9939728878971848e-35	Epithelial cells
Ccdc162	7.2050001097464585e-40	1.608511165337332	0.363	0.056	2.4277968369801667e-35	Epithelial cells
Plce1	1.6624709353522035e-38	1.667784913565501	0.582	0.146	5.601862063762785e-34	Epithelial cells
Stk39	4.239072028266596e-38	2.883543349621868	0.802	0.402	1.4283977106447123e-33	Epithelial cells
Rbms1	3.754590245062308e-37	1.6783380752813533	0.637	0.186	1.2651467289761954e-32	Epithelial cells
Abcg2	1.6125709255142154e-36	1.6064440967895237	0.352	0.056	5.433718990612701e-32	Epithelial cells
Rgs22	2.1200441759426647e-36	1.2428114611797605	0.154	0.011	7.143700855256403e-32	Epithelial cells
Slc9a2	2.3112161145665717e-36	1.1446336397279953	0.231	0.025	7.787873819643521e-32	Epithelial cells
Mrc2	5.743332569325968e-36	1.275188487670199	0.275	0.036	1.935273342560078e-31	Epithelial cells
Lrriq1	2.1635994688520666e-35	2.0456258029353425	0.484	0.115	7.290464770243924e-31	Epithelial cells
Syne2	1.0444658856831579e-34	1.0759499695520982	0.319	0.048	3.5194322483979684e-30	Epithelial cells
Mid1	1.1418260406694608e-34	1.6013596389455982	0.407	0.079	3.847497026639815e-30	Epithelial cells
Fbn1	1.6195277108581046e-33	1.2352680962944593	0.341	0.057	5.457160574507469e-29	Epithelial cells
Gm20186	4.8647539448529894e-33	1.2443387264058983	0.198	0.02	1.6392274892576634e-28	Epithelial cells
Glis3	6.363477412127925e-33	1.972641616116932	0.495	0.12	2.1442373487906257e-28	Epithelial cells
Tcf7l2	7.494701041303522e-33	1.2971677185362986	0.429	0.082	2.5254144628776345e-28	Epithelial cells
Cfap65	1.7047528116035115e-32	1.383228309762432	0.352	0.063	5.744335073979192e-28	Epithelial cells
Slc7a2	9.514374438117151e-32	1.10309	0.253	0.033	3.2059636106679553e-27	Epithelial cells
Stard13	2.183129493403602e-30	1.7446468971507618	0.538	0.148	7.356273140972777e-26	Epithelial cells
Pde5a	6.585595642896524e-30	1.002552707074381	0.253	0.035	2.2190823078304127e-25	Epithelial cells
Slc23a2	6.698600410553502e-30	2.2377375277750216	0.714	0.326	2.257160394340108e-25	Epithelial cells
Afap1l1	1.920137553267731e-29	1.179804446385916	0.231	0.03	6.470095499490947e-25	Epithelial cells
Zfp521	5.23823631667512e-29	1.2402375212810006	0.44	0.1	1.7650761092668486e-24	Epithelial cells
Npr3	5.563598667397906e-29	1.400323902694537	0.308	0.054	1.8747102069663985e-24	Epithelial cells
Slc4a10	5.001814822899604e-28	2.438190234091615	0.802	0.582	1.6854115227242504e-23	Epithelial cells
Nfia	7.609892413109515e-28	1.4582450628362815	0.791	0.341	2.5642293475213822e-23	Epithelial cells
Zbtb20	2.265463982681639e-27	1.4914871980710358	0.912	0.599	7.63370743604405e-23	Epithelial cells
Spag17	4.855703760375964e-27	1.3852106101956356	0.176	0.02	1.636177939096285e-22	Epithelial cells
Rai14	5.049007819696683e-27	1.0247710864928181	0.33	0.063	1.7013136749249943e-22	Epithelial cells
Col8a1	6.4088354239902054e-27	1.670929033517104	0.264	0.042	2.1595211844677397e-22	Epithelial cells
Tead1	9.872781268707386e-27	1.1580043772680857	0.549	0.171	3.3267323763036406e-22	Epithelial cells
Dnah12	1.2477838959624754e-26	1.967719532731123	0.22	0.031	4.204532615835157e-22	Epithelial cells
Elf1	1.745138620783455e-26	1.1340350372148216	0.264	0.042	5.88041909659193e-22	Epithelial cells
Gm49267	2.397794138301439e-26	1.5839259738472125	0.264	0.044	8.079607128420529e-22	Epithelial cells
Sntb1	6.85740991878162e-26	1.1307079531662825	0.22	0.031	2.3106728462326545e-21	Epithelial cells
Pitpnc1	1.7639264863067913e-25	1.4379545280347654	0.802	0.421	5.943726688259364e-21	Epithelial cells
Ak7	7.924362805450909e-25	1.292371619648903	0.231	0.036	2.670193290924738e-20	Epithelial cells
Ifi27	1.4632678569408017e-24	1.1035189863739063	0.352	0.077	4.930627370747726e-20	Epithelial cells
Hydin	1.0180079447281843e-23	1.2709167015598195	0.264	0.047	3.43027957055609e-19	Epithelial cells
Sned1	1.1622191119288702e-23	1.0492077280072305	0.308	0.062	3.916213519555521e-19	Epithelial cells
C330002G04Rik	1.5315224426700753e-23	1.5666056080529809	0.319	0.069	5.160618022821085e-19	Epithelial cells
Vwa3a	1.9445162800530503e-23	1.3410735451320435	0.264	0.048	6.552242057266758e-19	Epithelial cells
Tsc22d3	2.7056955341866293e-23	1.3058486625498837	0.341	0.075	9.117111671995266e-19	Epithelial cells
Itpkb	4.520481563590102e-23	1.0049091214862698	0.319	0.067	1.523221467667321e-18	Epithelial cells
Ddx5	5.484703166623924e-23	1.1852139811616347	0.901	0.865	1.8481255790255973e-18	Epithelial cells
Gm14066	2.7280723301734606e-22	1.1519242681847008	0.22	0.036	9.192512523752493e-18	Epithelial cells
Rspo3	1.0585529198244642e-21	1.774327447626313	0.341	0.084	3.566899918640515e-17	Epithelial cells
Slc9b2	1.4361012962210799e-21	1.0166234699385204	0.253	0.048	4.839086927746551e-17	Epithelial cells
Antxr1	5.085716216918728e-21	1.198498532208692	0.407	0.116	1.7136829364529346e-16	Epithelial cells
Gab1	1.0963411111644412e-20	1.0359041185557585	0.363	0.089	3.694231008179701e-16	Epithelial cells
Mpp7	1.2642712627097755e-20	1.2209045444151807	0.308	0.07	4.26008844682686e-16	Epithelial cells
Gm5089	1.6626580699294297e-20	1.2698101860078055	0.396	0.111	5.602492632434207e-16	Epithelial cells
Slc38a2	1.666484261685264e-20	3.0819294425241037	0.659	0.356	5.615385368174666e-16	Epithelial cells
3300002A11Rik	1.7824135176259318e-19	1.5612552633554457	0.22	0.04	6.00602058899234e-15	Epithelial cells
Foxp2	3.108610050068022e-19	1.9020025629648305	0.473	0.159	1.0474772424709207e-14	Epithelial cells
Crispld1	4.215704492129211e-19	1.5812700059095939	0.264	0.057	1.4205237856678589e-14	Epithelial cells
Iqck	9.327181460045535e-19	1.0456424359429521	0.22	0.041	3.1428870647769434e-14	Epithelial cells
Slc12a2	1.0200474404339867e-18	1.2117296143031704	0.473	0.172	3.437151855286362e-14	Epithelial cells
Sulf1	1.8557161202768507e-18	1.9278956566150711	0.407	0.133	6.253021038884876e-14	Epithelial cells
9530026P05Rik	2.396459887381457e-18	1.4928810181261754	0.571	0.238	8.075111236520558e-14	Epithelial cells
Parva	3.493815720404873e-18	1.0546201149415744	0.286	0.068	1.177276145147626e-13	Epithelial cells
Cald1	4.598383698754255e-18	1.3893403667112487	0.473	0.178	1.549471371132234e-13	Epithelial cells
Car12	5.886513110139366e-18	1.4039531152419222	0.33	0.092	1.9835194575925608e-13	Epithelial cells
Cfap44	6.670019013590832e-18	1.4723889079010277	0.385	0.123	2.247529606819567e-13	Epithelial cells
Gm28153	7.914091141491711e-18	1.513375441442371	0.308	0.079	2.666732151037047e-13	Epithelial cells
Fbxl7	9.758653199752009e-18	2.835143829439641	0.484	0.198	3.288275782188437e-13	Epithelial cells
Igfbp5	9.954986893163292e-18	1.1796589901775434	0.242	0.051	3.354432383520303e-13	Epithelial cells
Kif6	6.039683405503608e-17	1.1860471033571234	0.275	0.067	2.0351317203184956e-12	Epithelial cells
Clybl	6.267493834410868e-17	1.1300795683007463	0.44	0.159	2.1118947224430863e-12	Epithelial cells
Ttr	1.4057544267339682e-16	2.733650335800926	0.868	0.766	4.7368301163227794e-12	Epithelial cells
Kif9	8.346837225368726e-16	1.2786018204731542	0.33	0.1	2.812550271460246e-11	Epithelial cells
Hs3st1	8.808101933316882e-16	1.1574184046963996	0.253	0.06	2.967978027450457e-11	Epithelial cells
Gm41604	1.959812983259802e-15	1.330672085741354	0.33	0.101	6.603785828392229e-11	Epithelial cells
Dnah9	2.5468846599582886e-15	1.4683188409439274	0.429	0.169	8.58198255019545e-11	Epithelial cells
Exoc4	3.4215056723036646e-15	1.2055681861776089	0.802	0.711	1.1529105513394429e-10	Epithelial cells
Naaladl2	5.077191044255628e-15	1.5579739959574384	0.703	0.501	1.7108102942723766e-10	Epithelial cells
Airn	5.381122043008225e-15	1.3049500353018475	0.527	0.253	1.8132228836120514e-10	Epithelial cells
Abcd3	5.5695082158242835e-15	1.3741040639094553	0.44	0.179	1.8767014884041505e-10	Epithelial cells
Foxp1	1.1417493368670643e-14	2.526673015647741	0.747	0.617	3.84723856550726e-10	Epithelial cells
Spag6l	1.2042870398887623e-14	1.3354631920278703	0.33	0.106	4.0579656096091733e-10	Epithelial cells
Irs1	4.4503399593997047e-13	1.0301749232643793	0.352	0.126	1.4995865527193244e-8	Epithelial cells
Cpq	1.3114676309773195e-12	1.052976211111286	0.319	0.105	4.4191213293411757e-8	Epithelial cells
Pid1	3.0534505278795126e-12	1.2737335149252926	0.681	0.515	1.0288906898742806e-7	Epithelial cells
Zbbx	3.3303092171994216e-12	1.0972429084613402	0.275	0.086	1.1221809938275171e-7	Epithelial cells
Slco1c1	6.1248569284613935e-12	1.0638237692517327	0.275	0.081	2.063831790614351e-7	Epithelial cells
Prlr	9.529448225251346e-12	1.811628437478952	0.33	0.124	3.2110428739806935e-7	Epithelial cells
Enpp2	1.7750391857566675e-11	3.908600048623172	0.429	0.218	5.981172040325667e-7	Epithelial cells
Gpc6	2.392565006316655e-11	1.2085907810475156	0.769	0.503	8.061987045284601e-7	Epithelial cells
Tgfbr3	4.0187326124001624e-11	1.1636884642608403	0.407	0.186	1.3541521410743587e-6	Epithelial cells
Hsp90b1	4.30274634976944e-11	1.1246982229067128	0.648	0.457	1.4498534100183106e-6	Epithelial cells
Tmem164	6.086936817062309e-11	1.2002774650539254	0.473	0.24	2.0510542298773157e-6	Epithelial cells
Atp11a	1.4677688866038525e-10	1.159543247004168	0.396	0.182	4.9457940403003415e-6	Epithelial cells
Bicc1	2.1155761859798192e-10	1.2703386936785945	0.429	0.217	7.128645516277598e-6	Epithelial cells
Nhsl2	3.9841071535801344e-10	1.9954364539503078	0.495	0.314	1.3424847464703621e-5	Epithelial cells
Samd4	4.8435449149803e-10	1.0647592546106632	0.527	0.307	1.632080894551762e-5	Epithelial cells
Fndc3b	4.926100772074314e-10	1.1900412821019382	0.549	0.356	1.659898916158161e-5	Epithelial cells
Slc38a1	1.1550870991917096e-9	1.2588710889206534	0.429	0.224	3.892181489436385e-5	Epithelial cells
Klf9	1.9205748709400996e-9	1.1623369525698526	0.473	0.262	6.47156908511976e-5	Epithelial cells
Plcb4	2.2417263212370796e-9	1.029491641838786	0.549	0.339	7.553721012040464e-5	Epithelial cells
Gm973	2.6068111681044458e-9	1.1419757637558634	0.22	0.068	8.78391091204474e-5	Epithelial cells
Cfap61	2.7923465024004615e-9	1.019780889919253	0.253	0.091	9.409090774488595e-5	Epithelial cells
Dnah2	5.493236253288652e-9	1.073167045143071	0.22	0.073	1.851000887908144e-4	Epithelial cells
Dnai4	5.733148197650071e-9	1.2328453937184345	0.44	0.262	1.9318416166801678e-4	Epithelial cells
Fam227b	9.486949891853371e-9	1.311218363235173	0.297	0.125	3.196722635558912e-4	Epithelial cells
Rasa2	1.2338857616021188e-8	1.385958278269169	0.484	0.314	4.1577014622945e-4	Epithelial cells
Bbs9	1.25527001444419e-8	1.0215793318895108	0.527	0.349	4.2297578406711426e-4	Epithelial cells
Armc2	1.9978474445744363e-8	1.1531217675663872	0.341	0.163	6.731946749238021e-4	Epithelial cells
Sh3d19	2.4424929408914042e-8	2.101046802942478	0.44	0.265	8.230224213627676e-4	Epithelial cells
Fkbp5	3.3448669565726246e-8	2.1719706885641377	0.462	0.306	0.00112709	Epithelial cells
Dnajc3	3.496774445877237e-8	1.116060899369403	0.462	0.274	0.00117827	Epithelial cells
Cab39l	5.936043528426578e-8	1.3800626349305074	0.44	0.27	0.00200021	Epithelial cells
Sh3pxd2a	8.781394567867388e-8	1.7183546947502712	0.363	0.203	0.00295898	Epithelial cells
Esrrg	1.3070352491974257e-7	1.515417623546114	0.527	0.412	0.00440419	Epithelial cells
Gm26542	1.557878434962567e-7	1.0049636454463693	0.396	0.226	0.00524943	Epithelial cells
Arhgap10	1.8256900023983116e-7	1.0649150699797212	0.33	0.161	0.00615185	Epithelial cells
Gm22146	2.3698578126502298e-7	1.0239760610695428	0.22	0.084	0.00798547	Epithelial cells
Itpr1	4.197196043308522e-7	1.1965361245663266	0.582	0.465	0.014142871787532395	Epithelial cells
Maml2	1.355889671765475e-6	1.0266431349108223	0.495	0.32	0.045688058379809444	Epithelial cells

## Sheet: Table_S4_glut_cluster_markers
cell_type	gene	p_val	avg_log2FC	pct.1	pct.2	p_val_adj	cluster
glut_neurons	Adarb2	0	2.69058	0.791	0.24	0	0
glut_neurons	Zfp804b	0	2.01974	0.802	0.298	0	0
glut_neurons	Gm28905	0	1.8158	0.711	0.211	0	0
glut_neurons	Usp29	0	1.57614	0.971	0.748	0	0
glut_neurons	4930555F03Rik	0	1.52115	0.821	0.377	0	0
glut_neurons	Rmst	0	1.47208	0.878	0.387	0	0
glut_neurons	Zbtb7c	0	1.42376	0.668	0.187	0	0
glut_neurons	Arhgap24	0	1.27377	0.523	0.127	0	0
glut_neurons	Grid2	0	1.21086	0.987	0.859	0	0
glut_neurons	Baiap3	0	1.1769	0.574	0.128	0	0
glut_neurons	Lhfpl3	9.4301e-302	1.20767	0.888	0.548	3.17757e-297	0
glut_neurons	B230217J21Rik	1.24922e-297	1.41177	0.541	0.155	4.20936e-293	0
glut_neurons	C130073E24Rik	3.59177e-293	1.32407	0.778	0.37	1.21028e-288	0
glut_neurons	Gm45321	3.53458e-283	1.39832	0.739	0.317	1.19101e-278	0
glut_neurons	Unc13c	2.95699e-272	1.21233	0.697	0.288	9.96388e-268	0
glut_neurons	Sema5a	5.69128e-263	1.04701	0.535	0.16	1.91773e-258	0
glut_neurons	Nova1	1.11021e-259	1.15862	0.608	0.247	3.74095e-255	0
glut_neurons	Gm2516	2.96849e-251	1.17817	0.696	0.297	1.00026e-246	0
glut_neurons	Nhs	1.44444e-241	1.05769	0.577	0.205	4.86719e-237	0
glut_neurons	Sgcz	3.7205e-235	1.00994	0.975	0.784	1.25366e-230	0
glut_neurons	Grb10	3.10133e-231	1.01971	0.684	0.351	1.04503e-226	0
glut_neurons	Zfp804a	2.46967e-210	1.22493	0.756	0.487	8.32181e-206	0
glut_neurons	Htr2c	4.83849e-196	1.13744	0.783	0.493	1.63038e-191	0
glut_neurons	Ntng1	1.10482e-193	1.03297	0.795	0.506	3.72279e-189	0
glut_neurons	Cep112	2.24711e-155	1.03551	0.572	0.297	7.57187e-151	0
glut_neurons	Tafa1	1.93873e-269	1.3954	0.992	0.712	6.53273e-265	1
glut_neurons	Trps1	5.08486e-269	1.6258	0.797	0.371	1.71339e-264	1
glut_neurons	Rgs6	2.45347e-259	1.33196	0.944	0.609	8.26721e-255	1
glut_neurons	Tafa2	1.32289e-215	1.35373	0.946	0.73	4.45761e-211	1
glut_neurons	4933424G05Rik	2.90171e-194	1.21431	0.74	0.365	9.7776e-190	1
glut_neurons	Pdzrn3	1.64979e-183	1.40518	0.68	0.287	5.55913e-179	1
glut_neurons	Ptprt	1.09422e-154	1.16237	0.787	0.437	3.68708e-150	1
glut_neurons	Pdzrn3	2.33433e-255	1.38098	0.805	0.285	7.86575e-251	2
glut_neurons	Ncam2	5.91133e-199	1.01682	0.996	0.906	1.99188e-194	2
glut_neurons	Grm8	4.71378e-168	1.08473	0.907	0.511	1.58835e-163	2
glut_neurons	Gm34544	2.00829e-45	1.0576	0.367	0.174	6.76712e-41	2
glut_neurons	Adamtsl1	1.67861e-156	1.47228	0.715	0.305	5.65626e-152	3
glut_neurons	Lypd1	1.2723e-152	1.04876	0.83	0.455	4.28716e-148	3
glut_neurons	Kctd16	3.27303e-148	1.04834	0.966	0.837	1.10288e-143	3
glut_neurons	Tox	1.36491e-147	1.05395	0.734	0.311	4.5992e-143	3
glut_neurons	Cdh9	0	1.97576	0.945	0.461	0	4
glut_neurons	Man1a	0	1.76024	0.875	0.197	0	4
glut_neurons	Rspo2	0	1.14402	0.599	0.056	0	4
glut_neurons	Gm11639	0	1.02005	0.594	0.093	0	4
glut_neurons	Grm8	2.83608e-288	1.6291	0.973	0.509	9.55645e-284	4
glut_neurons	Plxna4	1.11802e-282	1.44624	0.982	0.74	3.76729e-278	4
glut_neurons	Schip1	1.85353e-282	1.43641	0.997	0.9	6.24566e-278	4
glut_neurons	Gm49127	4.37814e-279	1.08146	0.653	0.14	1.47526e-274	4
glut_neurons	Lrrc4c	2.64506e-269	1.30613	0.997	0.954	8.9128e-265	4
glut_neurons	Gpc6	4.66396e-268	1.50495	0.973	0.494	1.57157e-263	4
glut_neurons	Etv1	3.7192e-267	1.35983	0.834	0.273	1.25322e-262	4
glut_neurons	Adamtsl1	1.31162e-258	1.62819	0.855	0.292	4.41964e-254	4
glut_neurons	Dlc1	4.76934e-255	1.36613	0.852	0.326	1.60708e-250	4
glut_neurons	Htr1f	4.06365e-248	1.35379	0.95	0.483	1.36929e-243	4
glut_neurons	2610035D17Rik	4.13619e-237	1.16057	0.796	0.279	1.39373e-232	4
glut_neurons	Prkcb	6.05422e-237	1.14768	0.993	0.75	2.04003e-232	4
glut_neurons	Etl4	6.97098e-230	1.37648	0.987	0.634	2.34894e-225	4
glut_neurons	Mir99ahg	4.19187e-226	1.31924	0.977	0.723	1.41249e-221	4
glut_neurons	Opcml	5.7511e-226	1.05242	0.999	0.945	1.93789e-221	4
glut_neurons	Gm48749	3.05398e-225	1.13468	0.789	0.251	1.02907e-220	4
glut_neurons	Il1rapl2	1.15721e-209	1.08414	0.949	0.433	3.89933e-205	4
glut_neurons	Gm49678	1.96271e-208	1.22081	0.953	0.458	6.61354e-204	4
glut_neurons	Pigk	6.07742e-208	1.15919	0.986	0.796	2.04785e-203	4
glut_neurons	Sh3gl2	5.29032e-197	1.08517	0.97	0.764	1.78263e-192	4
glut_neurons	Tcf4	2.01962e-196	1.11987	0.984	0.777	6.8053e-192	4
glut_neurons	Klhl29	5.3283e-192	1.09979	0.948	0.69	1.79543e-187	4
glut_neurons	Gm34544	2.02127e-185	2.32605	0.56	0.157	6.81088e-181	4
glut_neurons	C1ql3	8.593e-185	1.1937	0.954	0.643	2.8955e-180	4
glut_neurons	Zfpm2	7.18144e-181	1.05669	0.974	0.577	2.41986e-176	4
glut_neurons	St6galnac5	7.92202e-181	1.0744	0.962	0.665	2.6694e-176	4
glut_neurons	Ldb2	1.44729e-180	1.04135	0.977	0.671	4.8768e-176	4
glut_neurons	Cdh8	2.62199e-175	1.16747	0.923	0.53	8.83507e-171	4
glut_neurons	Zeb2	1.57602e-173	1.01235	0.956	0.576	5.31057e-169	4
glut_neurons	Tspan5	2.19169e-171	1.05734	0.962	0.692	7.3851e-167	4
glut_neurons	Clstn2	8.79468e-170	1.21765	0.967	0.692	2.96346e-165	4
glut_neurons	4930445B16Rik	8.71708e-165	1.05008	0.851	0.398	2.93731e-160	4
glut_neurons	Plxna4os3	2.8928e-164	1.00531	0.768	0.313	9.74758e-160	4
glut_neurons	Gpc5	6.61119e-137	1.14653	0.681	0.285	2.22771e-132	4
glut_neurons	Slit2	1.24218e-123	1.01814	0.828	0.433	4.18565e-119	4
glut_neurons	Garnl3	2.14389e-89	1.12379	0.742	0.47	7.22407e-85	4
glut_neurons	Zbtb20	0	2.45847	0.991	0.524	0	5
glut_neurons	Pde11a	0	1.96438	0.621	0.047	0	5
glut_neurons	Nrp1	3.15762e-220	1.27096	0.69	0.213	1.06399e-215	5
glut_neurons	Lsamp	2.7718e-218	1.11141	0.999	0.996	9.33985e-214	5
glut_neurons	Htr4	1.05493e-213	1.20078	0.681	0.207	3.55469e-209	5
glut_neurons	Dgkg	2.49358e-193	1.2749	0.922	0.607	8.40238e-189	5
glut_neurons	Car12	1.24194e-188	1.0192	0.499	0.118	4.18484e-184	5
glut_neurons	Tanc1	6.49118e-183	1.12523	0.652	0.217	2.18727e-178	5
glut_neurons	Pex5l	4.39449e-178	1.26976	0.958	0.813	1.48077e-173	5
glut_neurons	Cpne7	1.21048e-168	1.16165	0.827	0.416	4.07883e-164	5
glut_neurons	Slc1a3	1.26238e-164	1.07727	0.45	0.108	4.25372e-160	5
glut_neurons	4930419G24Rik	3.41879e-164	1.22933	0.929	0.695	1.15199e-159	5
glut_neurons	Zfpm2	4.50676e-163	1.22115	0.926	0.583	1.5186e-158	5
glut_neurons	Pcdh17	2.94714e-157	1.08897	0.887	0.553	9.93069e-153	5
glut_neurons	Zmat4	4.32616e-156	1.56199	0.69	0.311	1.45774e-151	5
glut_neurons	Nfib	6.00613e-154	1.02545	0.922	0.528	2.02383e-149	5
glut_neurons	Chrna7	1.25389e-151	1.25193	0.604	0.222	4.22509e-147	5
glut_neurons	Gm13481	1.06575e-146	1.24196	0.455	0.122	3.59116e-142	5
glut_neurons	Nkain3	7.13663e-143	1.02497	0.954	0.724	2.40476e-138	5
glut_neurons	Gm37459	3.51225e-129	1.07617	0.867	0.561	1.18349e-124	5
glut_neurons	Nr3c2	2.76249e-128	1.14662	0.889	0.585	9.30849e-124	5
glut_neurons	Gm12296	1.11212e-127	1.30978	0.734	0.345	3.74742e-123	5
glut_neurons	Chrm3	1.40791e-126	1.02918	0.895	0.571	4.74409e-122	5
glut_neurons	Ahcyl2	3.41997e-116	1.00174	0.855	0.631	1.15239e-111	5
glut_neurons	Unc5d	3.08558e-114	1.29231	0.913	0.761	1.03972e-109	5
glut_neurons	Frmpd4	2.1835e-102	1.1339	0.936	0.854	7.35754e-98	5
glut_neurons	Shisa6	8.41738e-92	1.08851	0.75	0.437	2.83632e-87	5
glut_neurons	Gm32647	2.48828e-33	1.31097	0.498	0.328	8.3845e-29	5
glut_neurons	Pbx3	0	2.659	0.924	0.26	0	6
glut_neurons	Meis1	0	2.49171	0.823	0.036	0	6
glut_neurons	C79798	0	1.40125	0.613	0.069	0	6
glut_neurons	Hs3st4	1.81222e-301	2.1553	0.965	0.592	6.10647e-297	6
glut_neurons	Pard3bos1	1.93723e-301	1.47404	0.446	0.051	6.52769e-297	6
glut_neurons	Meis2	4.33436e-288	1.96954	0.876	0.335	1.46051e-283	6
glut_neurons	Nxph1	5.551e-277	2.46855	0.732	0.21	1.87047e-272	6
glut_neurons	Pard3b	6.86626e-181	1.7474	0.6	0.188	2.31365e-176	6
glut_neurons	Lhfpl3	9.01702e-139	1.31004	0.896	0.59	3.03838e-134	6
glut_neurons	Inpp4b	3.04479e-132	1.29326	0.89	0.569	1.02597e-127	6
glut_neurons	Pcdh11x	3.72262e-129	1.50623	0.713	0.329	1.25437e-124	6
glut_neurons	Elavl2	8.3239e-127	1.18145	0.743	0.402	2.80482e-122	6
glut_neurons	Srrm4	5.57595e-122	1.20318	0.828	0.601	1.87887e-117	6
glut_neurons	Cdh6	3.67936e-119	1.05852	0.369	0.091	1.2398e-114	6
glut_neurons	Gm16599	1.76288e-114	1.01105	0.831	0.498	5.94021e-110	6
glut_neurons	Etl4	7.85995e-100	1.10002	0.886	0.646	2.64849e-95	6
glut_neurons	Vwc2l	2.22019e-98	1.42853	0.506	0.208	7.48116e-94	6
glut_neurons	Alk	4.65363e-98	1.08004	0.385	0.114	1.56809e-93	6
glut_neurons	Cntn5	1.35637e-92	1.04852	0.931	0.801	4.57044e-88	6
glut_neurons	Chrm3	3.51377e-89	1.25528	0.824	0.58	1.184e-84	6
glut_neurons	Il1rapl2	1.78151e-50	1.8885	0.625	0.467	6.00298e-46	6
glut_neurons	Pcdh15	2.36865e-45	1.03401	0.789	0.71	7.98141e-41	6
glut_neurons	Gm20713	5.75694e-39	1.12409	0.297	0.131	1.93986e-34	6
glut_neurons	Gpc5	1.07444e-26	1.55467	0.455	0.309	3.62045e-22	6
glut_neurons	Ebf1	3.33821e-23	1.11429	0.131	0.046	1.12484e-18	6
glut_neurons	Reln	3.32655e-210	1.61236	0.687	0.161	1.12092e-205	7
glut_neurons	Trabd2b	6.577e-173	1.08857	0.49	0.09	2.21619e-168	7
glut_neurons	Trpm3	8.42427e-173	1.802	0.998	0.753	2.83864e-168	7
glut_neurons	Dab1	1.33175e-158	1.12034	0.998	0.931	4.48747e-154	7
glut_neurons	Unc5d	1.79304e-124	1.18987	0.992	0.76	6.04183e-120	7
glut_neurons	Slc4a4	8.33869e-122	1.01636	0.735	0.283	2.80981e-117	7
glut_neurons	Rorb	4.1024e-112	1.07773	0.532	0.152	1.38235e-107	7
glut_neurons	Rfx3	5.26263e-108	1.1437	0.962	0.732	1.7733e-103	7
glut_neurons	Nfib	4.96447e-103	1.02873	0.922	0.54	1.67283e-98	7
glut_neurons	Rgs6	2.05234e-88	1.10179	0.928	0.635	6.91557e-84	7
glut_neurons	Dach1	2.18897e-85	1.19036	0.598	0.239	7.37597e-81	7
glut_neurons	E130114P18Rik	5.83137e-142	1.88113	0.533	0.127	1.96494e-137	8
glut_neurons	Nxph1	1.61775e-54	1.01115	0.539	0.237	5.45118e-50	8
glut_neurons	Ntng1	7.22335e-51	1.0915	0.791	0.551	2.43398e-46	8
glut_neurons	Zfp804b	8.94251e-22	1.13777	0.569	0.388	3.01327e-17	8
glut_neurons	Satb2	0	1.69871	0.769	0.102	0	9
glut_neurons	Rai14	2.11423e-287	1.20781	0.61	0.067	7.12412e-283	9
glut_neurons	Osbpl3	6.02623e-250	1.16806	0.624	0.082	2.0306e-245	9
glut_neurons	Etl4	1.58261e-198	2.37649	0.994	0.651	5.33277e-194	9
glut_neurons	Thsd7b	1.66312e-198	2.50942	0.905	0.348	5.60406e-194	9
glut_neurons	Grik3	2.2025e-184	1.5056	0.855	0.245	7.42153e-180	9
glut_neurons	Vxn	1.10563e-180	1.26201	0.716	0.162	3.72554e-176	9
glut_neurons	Cntnap4	1.76378e-180	1.67577	0.811	0.23	5.94324e-176	9
glut_neurons	Dpp10	1.43207e-176	2.37782	0.978	0.908	4.82551e-172	9
glut_neurons	Frmpd4	1.73312e-176	2.24837	0.992	0.855	5.83993e-172	9
glut_neurons	Olfm3	8.82361e-174	1.7408	0.864	0.262	2.9732e-169	9
glut_neurons	Cdh18	2.00079e-166	2.41696	0.983	0.656	6.74186e-162	9
glut_neurons	Gm45904	7.32702e-162	1.38711	0.602	0.12	2.46891e-157	9
glut_neurons	Mpped1	2.93815e-159	1.16654	0.702	0.169	9.90038e-155	9
glut_neurons	Sdk2	6.18933e-158	1.47034	0.802	0.251	2.08556e-153	9
glut_neurons	Mmp16	1.06877e-157	1.80802	0.969	0.765	3.60134e-153	9
glut_neurons	Sdk1	5.66204e-154	1.91144	0.869	0.324	1.90788e-149	9
glut_neurons	Khdrbs3	3.91523e-146	1.47792	0.975	0.741	1.31927e-141	9
glut_neurons	Dlc1	2.16901e-143	1.73337	0.852	0.352	7.30869e-139	9
glut_neurons	Gm17171	1.91344e-140	1.24381	0.727	0.208	6.44754e-136	9
glut_neurons	Atp10a	3.82161e-140	1.13079	0.479	0.085	1.28773e-135	9
glut_neurons	Foxp2	9.26175e-136	1.19413	0.515	0.095	3.12084e-131	9
glut_neurons	Slc35f3	5.05488e-130	1.56548	0.9	0.485	1.70329e-125	9
glut_neurons	Tle4	5.79069e-129	1.53038	0.85	0.382	1.95123e-124	9
glut_neurons	Tmem178	1.32728e-122	1.38177	0.733	0.256	4.4724e-118	9
glut_neurons	Hs3st2	8.13321e-122	1.19522	0.604	0.153	2.74057e-117	9
glut_neurons	Fut9	1.50391e-121	1.49389	0.933	0.606	5.06756e-117	9
glut_neurons	Bcl11a	2.49237e-116	1.19648	0.838	0.338	8.39828e-112	9
glut_neurons	Prkd1	5.27085e-116	1.13619	0.518	0.115	1.77607e-111	9
glut_neurons	Slc1a2	3.59153e-114	1.58169	0.905	0.584	1.2102e-109	9
glut_neurons	Bcl2	1.65879e-107	1.06487	0.588	0.162	5.58944e-103	9
glut_neurons	Col11a1	2.61797e-105	1.30682	0.348	0.057	8.8215e-101	9
glut_neurons	Ext1	6.03251e-104	1.25804	0.958	0.723	2.03271e-99	9
glut_neurons	Arap2	2.84104e-103	1.16575	0.702	0.263	9.57317e-99	9
glut_neurons	Pde1a	9.728e-99	1.28205	0.964	0.881	3.27795e-94	9
glut_neurons	Pcdh9	1.19499e-98	1.02032	0.997	0.963	4.02665e-94	9
glut_neurons	Oprm1	1.21372e-96	1.27278	0.916	0.545	4.08975e-92	9
glut_neurons	Nfib	3.67968e-96	1.12879	0.947	0.546	1.23991e-91	9
glut_neurons	Pde4d	2.38649e-93	1.103	0.975	0.874	8.04152e-89	9
glut_neurons	Gas7	1.98179e-90	1.13754	0.855	0.51	6.67785e-86	9
glut_neurons	Pou6f2	3.87007e-89	1.02889	0.591	0.187	1.30406e-84	9
glut_neurons	Gm15155	2.40651e-88	1.00592	0.563	0.166	8.10896e-84	9
glut_neurons	Prickle1	2.88247e-88	1.04288	0.953	0.823	9.71277e-84	9
glut_neurons	Slc8a1	7.41386e-88	1.16469	0.967	0.912	2.49817e-83	9
glut_neurons	Gsdme	6.23404e-87	1.26762	0.889	0.564	2.10062e-82	9
glut_neurons	Hs3st4	1.30181e-85	1.89447	0.825	0.613	4.38659e-81	9
glut_neurons	Sema6d	4.04376e-84	1.10246	0.88	0.494	1.36258e-79	9
glut_neurons	Gm49678	7.42966e-84	1.3751	0.872	0.487	2.5035e-79	9
glut_neurons	Foxp1	6.32452e-83	1.00283	0.953	0.751	2.13111e-78	9
glut_neurons	Chrm3	4.95285e-81	1.37779	0.894	0.587	1.66891e-76	9
glut_neurons	Meis2	5.57748e-75	1.04051	0.794	0.361	1.87939e-70	9
glut_neurons	Slc35f1	1.91302e-66	1.11197	0.889	0.718	6.44612e-62	9
glut_neurons	Nfia	5.5066e-66	1.06479	0.733	0.363	1.85551e-61	9
glut_neurons	Adcy2	7.03986e-65	1.01144	0.844	0.497	2.37215e-60	9
glut_neurons	Gm48742	9.63239e-65	1.05931	0.66	0.299	3.24573e-60	9
glut_neurons	Vwc2l	4.24303e-64	1.00193	0.577	0.218	1.42973e-59	9
glut_neurons	Rasgef1b	4.28109e-59	1.03854	0.816	0.499	1.44255e-54	9
glut_neurons	6530403H02Rik	4.20512e-52	1.1606	0.788	0.482	1.41696e-47	9
glut_neurons	Mgat4c	2.44816e-51	1.13062	0.939	0.758	8.24932e-47	9
glut_neurons	Epha3	2.38704e-48	1.0026	0.677	0.363	8.04336e-44	9
glut_neurons	Cdh12	1.2114e-27	1.0712	0.521	0.303	4.08193e-23	9
glut_neurons	Shisa6	1.18478e-25	1.01378	0.63	0.458	3.99222e-21	9
glut_neurons	Gm12296	2.1009e-25	1.05405	0.56	0.371	7.07918e-21	9
glut_neurons	A330015K06Rik	5.68292e-20	1.03064	0.682	0.549	1.91492e-15	9
glut_neurons	Satb2	7.33249e-232	1.60349	0.768	0.11	2.47076e-227	10
glut_neurons	Mkx	3.71705e-182	1.18218	0.544	0.065	1.2525e-177	10
glut_neurons	Sdk1	8.77288e-165	2.31291	0.965	0.327	2.95611e-160	10
glut_neurons	Col23a1	2.45585e-162	1.74147	0.826	0.193	8.27522e-158	10
glut_neurons	Tenm3	6.66392e-159	2.73758	0.996	0.532	2.24547e-154	10
glut_neurons	Sulf1	2.96661e-158	1.43601	0.803	0.178	9.99629e-154	10
glut_neurons	Col6a1	3.13832e-148	1.03994	0.552	0.08	1.05749e-143	10
glut_neurons	Galnt14	2.7341e-141	1.81392	0.869	0.274	9.21283e-137	10
glut_neurons	Chst9	2.07703e-128	1.89014	0.749	0.196	6.99877e-124	10
glut_neurons	Kcnq5	8.25633e-124	1.62841	0.992	0.861	2.78205e-119	10
glut_neurons	Clstn2	1.14703e-111	1.78157	0.992	0.709	3.86503e-107	10
glut_neurons	Ntng2	2.40071e-111	1.2572	0.625	0.143	8.08944e-107	10
glut_neurons	Nfia	7.07147e-108	1.57294	0.907	0.362	2.3828e-103	10
glut_neurons	Spag16	2.58579e-98	1.11077	0.293	0.034	8.71306e-94	10
glut_neurons	Mpped1	3.46332e-98	1.02737	0.668	0.177	1.167e-93	10
glut_neurons	Npsr1	1.2649e-90	1.28732	0.394	0.065	4.26222e-86	10
glut_neurons	Nrg1	2.71681e-89	1.24027	1	0.963	9.15457e-85	10
glut_neurons	Grid2	9.07256e-89	1.27556	0.996	0.881	3.05709e-84	10
glut_neurons	Dpp10	4.52979e-88	1.25438	0.996	0.908	1.52636e-83	10
glut_neurons	Olfm3	1.3496e-87	1.34754	0.78	0.272	4.54761e-83	10
glut_neurons	6530403H02Rik	1.69998e-84	1.45927	0.95	0.48	5.72826e-80	10
glut_neurons	Grik3	6.6916e-82	1.0924	0.757	0.255	2.2548e-77	10
glut_neurons	Kcnd2	2.0832e-80	1.02936	1	0.966	7.01954e-76	10
glut_neurons	Marchf1	2.94017e-79	1.10217	0.981	0.894	9.90721e-75	10
glut_neurons	Pex5l	5.03457e-78	1.16683	0.988	0.821	1.69645e-73	10
glut_neurons	Ptprk	4.44157e-75	1.24033	0.973	0.62	1.49663e-70	10
glut_neurons	4921534H16Rik	3.86825e-73	1.2281	0.795	0.355	1.30344e-68	10
glut_neurons	Pcdh15	2.82037e-72	1.32487	0.985	0.708	9.50353e-68	10
glut_neurons	Dgkg	5.33988e-72	1.1509	0.946	0.625	1.79933e-67	10
glut_neurons	Etv6	2.92152e-71	1.11958	0.703	0.281	9.84436e-67	10
glut_neurons	Ptprt	1.46437e-70	1.56845	0.838	0.471	4.93433e-66	10
glut_neurons	Pid1	3.97869e-70	1.21317	0.938	0.607	1.34066e-65	10
glut_neurons	4930419G24Rik	9.23766e-70	1.14703	0.973	0.708	3.11272e-65	10
glut_neurons	Gm1604a	3.04539e-67	1.03934	0.687	0.254	1.02617e-62	10
glut_neurons	Sox5	7.96275e-67	1.02542	0.931	0.486	2.68313e-62	10
glut_neurons	Gm15398	7.04622e-61	1.291	0.923	0.558	2.37429e-56	10
glut_neurons	Slc44a5	6.59626e-54	1.03025	0.838	0.461	2.22268e-49	10
glut_neurons	Thsd7b	8.32239e-49	1.09578	0.737	0.36	2.80431e-44	10
glut_neurons	Cdh13	1.83419e-47	1.00806	0.958	0.662	6.1805e-43	10
glut_neurons	Gm42439	5.23794e-47	1.03946	0.934	0.751	1.76498e-42	10
glut_neurons	Meis2	7.66099e-46	1.15736	0.737	0.368	2.58145e-41	10
glut_neurons	Ndnf	5.32594e-30	1.56208	0.182	0.021	1.79463e-25	11
glut_neurons	Hspa8	3.28356e-26	1.25466	0.864	0.853	1.10643e-21	11
glut_neurons	Calm1	3.32474e-22	1.25981	0.864	0.941	1.1203e-17	11
glut_neurons	Atp6v0c	2.26704e-20	1.24472	0.827	0.88	7.63902e-16	11
glut_neurons	Hsp90ab1	4.88369e-20	1.17486	0.836	0.921	1.64561e-15	11
glut_neurons	Fth1	3.29663e-19	1.14424	0.855	0.905	1.11083e-14	11
glut_neurons	Tmsb4x	5.1998e-18	1.25294	0.809	0.878	1.75213e-13	11
glut_neurons	Actb	2.25444e-17	1.27446	0.755	0.763	7.59655e-13	11
glut_neurons	Cst3	8.74085e-17	1.10861	0.836	0.885	2.94532e-12	11
glut_neurons	mt-Co3	1.22043e-16	1.19687	0.809	0.907	4.11236e-12	11
glut_neurons	Ubb	6.3996e-15	1.11714	0.755	0.825	2.15641e-10	11
glut_neurons	Ppia	7.67853e-15	1.12361	0.764	0.854	2.58736e-10	11
glut_neurons	Fau	2.25971e-14	1.19237	0.736	0.732	7.6143e-10	11
glut_neurons	Cox4i1	9.84027e-14	1.06224	0.791	0.892	3.31578e-09	11
glut_neurons	Aldoa	2.04473e-13	1.12184	0.727	0.773	6.88993e-09	11
glut_neurons	Hsp90aa1	1.70027e-12	1.32269	0.7	0.767	5.72921e-08	11
glut_neurons	Dynll1	2.25501e-11	1.12478	0.691	0.715	7.5985e-07	11
glut_neurons	Rplp1	7.62489e-11	1.07536	0.718	0.811	2.56928e-06	11
glut_neurons	Stmn3	2.7047e-10	1.04555	0.718	0.823	9.11375e-06	11
glut_neurons	Ttr	2.24003e-09	1.01726	0.7	0.766	7.54799e-05	11
glut_neurons	Tuba1a	4.61047e-09	1.0851	0.664	0.731	0.000155354	11
glut_neurons	Chchd2	5.8438e-09	1.10287	0.673	0.783	0.000196913	11
glut_neurons	mt-Atp6	1.1617e-08	1.12815	0.627	0.653	0.000391448	11
glut_neurons	mt-Co1	6.07887e-08	1.11479	0.655	0.752	0.00204834	11
glut_neurons	Rps7	1.1624e-07	1.12345	0.591	0.592	0.00391681	11
glut_neurons	Cmss1	1.19429e-07	1.02114	0.682	0.829	0.0040243	11
glut_neurons	Sec62	3.24397e-07	1.15791	0.582	0.596	0.0109309	11
glut_neurons	Pcp4	3.71233e-07	1.03028	0.6	0.63	0.0125091	11
glut_neurons	Rpl19	5.51761e-07	1.16308	0.636	0.707	0.0185921	11
glut_neurons	Atp5h	7.53717e-07	1.03404	0.6	0.649	0.0253973	11
glut_neurons	Rps29	9.14332e-07	1.15653	0.618	0.715	0.0308093	11
glut_neurons	Sim1	0	2.61772	0.882	0.018	0	12
glut_neurons	Gm2164	0	2.17771	0.892	0.037	0	12
glut_neurons	Frmpd1	0	1.18689	0.591	0.012	0	12
glut_neurons	Dach2	1.30788e-272	1.86319	0.742	0.033	4.40705e-268	12
glut_neurons	Gm38505	1.30497e-133	1.69538	0.72	0.066	4.39723e-129	12
glut_neurons	Plch1	5.15885e-81	1.189	0.581	0.07	1.73833e-76	12
glut_neurons	Dach1	1.27639e-79	2.0976	0.968	0.252	4.30091e-75	12
glut_neurons	Fras1	5.30332e-74	2.36601	0.968	0.313	1.78701e-69	12
glut_neurons	Sox2ot	1.99149e-71	1.68329	0.785	0.153	6.71051e-67	12
glut_neurons	A330102I10Rik	1.14715e-68	1.82528	0.935	0.271	3.86542e-64	12
glut_neurons	Maml3	5.64368e-63	2.26685	0.968	0.383	1.9017e-58	12
glut_neurons	Sema6d	1.91452e-62	2.78626	0.989	0.505	6.45117e-58	12
glut_neurons	Erbb4	1.99882e-57	1.98836	0.978	0.385	6.73522e-53	12
glut_neurons	Pde4b	9.01744e-55	2.1591	1	0.746	3.03852e-50	12
glut_neurons	Bmper	3.14683e-52	1.20609	0.548	0.094	1.06036e-47	12
glut_neurons	Synpr	5.00769e-52	1.76686	0.849	0.274	1.68739e-47	12
glut_neurons	Myo5b	1.24698e-51	1.34397	0.731	0.184	4.20182e-47	12
glut_neurons	Ank1	8.09458e-51	1.77296	0.828	0.268	2.72755e-46	12
glut_neurons	Hs6st3	9.92259e-51	2.2117	0.989	0.62	3.34352e-46	12
glut_neurons	Astn2	3.81331e-50	2.3204	0.978	0.736	1.28493e-45	12
glut_neurons	Fbn2	6.31038e-49	1.0027	0.57	0.105	2.12635e-44	12
glut_neurons	Sgcd	6.73876e-49	1.82316	1	0.837	2.27069e-44	12
glut_neurons	Gm34299	1.63536e-48	1.5356	0.796	0.238	5.51052e-44	12
glut_neurons	Zfp536	1.18828e-47	1.15286	0.731	0.176	4.00404e-43	12
glut_neurons	Klhl1	4.71147e-47	1.20361	0.591	0.115	1.58758e-42	12
glut_neurons	Efr3b	5.23571e-46	1.59995	0.925	0.435	1.76422e-41	12
glut_neurons	Sh3d19	1.33111e-45	1.61538	0.86	0.338	4.48532e-41	12
glut_neurons	Zeb2	6.92856e-45	1.69798	0.989	0.606	2.33465e-40	12
glut_neurons	Mei4	2.7374e-43	1.22868	0.677	0.172	9.22394e-39	12
glut_neurons	Fstl4	3.10305e-42	1.7823	0.968	0.674	1.0456e-37	12
glut_neurons	2610316D01Rik	2.79251e-41	1.19475	0.71	0.201	9.40964e-37	12
glut_neurons	Kcnd2	2.95132e-41	1.26508	1	0.967	9.94476e-37	12
glut_neurons	Rab3c	7.55327e-41	1.51549	0.989	0.637	2.54515e-36	12
glut_neurons	Lrrk2	9.9536e-40	1.27359	0.71	0.206	3.35397e-35	12
glut_neurons	Pbx1	1.07364e-39	1.15956	1	0.928	3.61775e-35	12
glut_neurons	Ptprj	2.19172e-39	1.46998	0.978	0.619	7.38523e-35	12
glut_neurons	L3mbtl4	1.0883e-38	1.12035	0.527	0.112	3.66714e-34	12
glut_neurons	Gm26713	1.791e-38	1.62482	0.828	0.307	6.03497e-34	12
glut_neurons	4930555F03Rik	7.71508e-38	1.57369	0.968	0.459	2.59967e-33	12
glut_neurons	A330008L17Rik	1.25088e-37	1.20567	0.656	0.181	4.21497e-33	12
glut_neurons	Plcb1	9.65127e-36	1.01989	1	0.959	3.25209e-31	12
glut_neurons	Pld5	1.24244e-35	1.11331	0.677	0.188	4.18652e-31	12
glut_neurons	Galntl6	1.40909e-35	1.3586	1	0.749	4.74807e-31	12
glut_neurons	Crtac1	8.28901e-35	1.49184	0.753	0.29	2.79306e-30	12
glut_neurons	Rmst	1.20388e-34	1.32115	0.968	0.478	4.0566e-30	12
glut_neurons	Lmo3	1.6737e-33	1.34389	0.946	0.593	5.63969e-29	12
glut_neurons	Kctd16	1.89073e-33	1.23228	1	0.848	6.37101e-29	12
glut_neurons	Gm45321	2.53455e-33	1.37393	0.903	0.395	8.54041e-29	12
glut_neurons	Cdh10	4.31951e-33	1.26037	0.978	0.647	1.4555e-28	12
glut_neurons	Shisa6	7.1195e-33	1.241	0.914	0.46	2.39899e-28	12
glut_neurons	C130073E24Rik	8.39619e-33	1.32921	0.946	0.445	2.82918e-28	12
glut_neurons	Gm13986	2.84225e-31	1.07138	0.538	0.142	9.57725e-27	12
glut_neurons	Kcnd3	3.86361e-31	1.13766	1	0.797	1.30188e-26	12
glut_neurons	Gm41414	8.80962e-31	1.16289	0.72	0.262	2.96849e-26	12
glut_neurons	Gm10649	1.05882e-30	1.2439	0.839	0.376	3.56781e-26	12
glut_neurons	Pcdh10	1.82726e-29	1.23333	0.892	0.452	6.15714e-25	12
glut_neurons	Gm2516	3.06649e-29	1.20114	0.882	0.37	1.03328e-24	12
glut_neurons	Ptprk	1.74765e-28	1.1192	0.989	0.627	5.88889e-24	12
glut_neurons	Dgkh	2.61744e-28	1.23343	0.914	0.562	8.81973e-24	12
glut_neurons	Gm15680	6.8581e-27	1.23831	0.624	0.209	2.31091e-22	12
glut_neurons	Robo2	1.2737e-26	1.21946	0.968	0.786	4.29185e-22	12
glut_neurons	Kcnh1	1.49284e-26	1.13124	0.871	0.498	5.03027e-22	12
glut_neurons	B130024G19Rik	4.54932e-26	1.12687	0.892	0.475	1.53294e-21	12
glut_neurons	Pigk	6.50018e-26	1.05712	1	0.811	2.1903e-21	12
glut_neurons	Slit2	1.04111e-25	1.14011	0.892	0.464	3.50813e-21	12
glut_neurons	Cacna2d3	1.70519e-25	1.02636	0.978	0.699	5.74581e-21	12
glut_neurons	Runx1t1	3.10539e-25	1.09852	0.817	0.412	1.04639e-20	12
glut_neurons	Brinp1	1.14822e-23	1.01443	0.978	0.786	3.86904e-19	12
glut_neurons	Wwc1	3.11296e-23	1.08565	0.763	0.417	1.04894e-18	12
glut_neurons	Pcsk5	1.90368e-22	1.00493	0.742	0.339	6.41464e-18	12
glut_neurons	4930587E11Rik	1.60717e-20	1.08724	0.903	0.546	5.41553e-16	12
glut_neurons	Efna5	1.58117e-30	1.79444	0.917	0.436	5.32791e-26	13
glut_neurons	Mpped1	6.46175e-30	1.29821	0.717	0.188	2.17735e-25	13
glut_neurons	Bmpr1b	2.20782e-29	1.1332	0.433	0.069	7.43948e-25	13
glut_neurons	Zfp385b	2.08127e-28	1.84718	0.967	0.516	7.01306e-24	13
glut_neurons	Grik3	1.07438e-26	1.5275	0.783	0.267	3.62021e-22	13
glut_neurons	Sox5	5.90682e-26	1.69256	0.933	0.496	1.99036e-21	13
glut_neurons	Nell1	7.37716e-26	1.71778	0.933	0.53	2.48581e-21	13
glut_neurons	Pcdh11x	2.55775e-21	1.47072	0.867	0.357	8.6186e-17	13
glut_neurons	Meis2	6.42606e-21	1.39391	0.867	0.376	2.16532e-16	13
glut_neurons	Gm34299	7.19372e-19	1.05291	0.683	0.241	2.42399e-14	13
glut_neurons	Galntl6	2.20583e-18	1.74953	0.917	0.751	7.43276e-14	13
glut_neurons	Cacnb2	1.04987e-17	1.13431	1	0.859	3.53763e-13	13
glut_neurons	Crtac1	1.23954e-17	1.06394	0.717	0.292	4.17674e-13	13
glut_neurons	Nfib	9.26229e-17	1.05505	0.95	0.56	3.12102e-12	13
glut_neurons	Nell1os	3.78558e-16	1.18282	0.65	0.261	1.27559e-11	13
glut_neurons	6530403H02Rik	4.78732e-16	1.2504	0.917	0.492	1.61313e-11	13
glut_neurons	Etv1	1.27906e-15	1.08639	0.75	0.32	4.30992e-11	13
glut_neurons	Gm13944	1.36287e-15	1.03635	0.617	0.227	4.59234e-11	13
glut_neurons	Tll1	1.5026e-13	1.00236	0.383	0.104	5.06315e-09	13
glut_neurons	Alcam	4.56135e-13	1.05927	0.95	0.772	1.53699e-08	13
glut_neurons	Inpp4b	9.40882e-12	1.09335	0.833	0.593	3.1704e-07	13
glut_neurons	Luzp2	4.73779e-11	1.14179	0.817	0.557	1.59645e-06	13
glut_neurons	Slc35f3	5.29314e-11	1.12683	0.75	0.501	1.78357e-06	13
glut_neurons	Xirp2	1.65519e-68	1.06282	0.447	0.026	5.57733e-64	14
glut_neurons	Satb2	2.28522e-39	1.25816	0.766	0.126	7.70028e-35	14
glut_neurons	Rspo2	3.76407e-31	1.06033	0.617	0.102	1.26834e-26	14
glut_neurons	Scube1	4.0818e-29	1.32757	0.745	0.166	1.3754e-24	14
glut_neurons	Mpped1	6.07597e-27	1.00044	0.809	0.188	2.04736e-22	14
glut_neurons	Dpp10	2.06382e-26	1.94505	1	0.91	6.95424e-22	14
glut_neurons	Grik3	6.97797e-26	1.54789	0.894	0.267	2.3513e-21	14
glut_neurons	Hs3st2	6.64501e-25	1.23237	0.702	0.169	2.2391e-20	14
glut_neurons	Ext1	5.46902e-21	1.34601	1	0.732	1.84284e-16	14
glut_neurons	Gm49678	1.44167e-18	1.4279	0.979	0.5	4.85784e-14	14
glut_neurons	Gm16226	2.69978e-17	1.01072	0.787	0.271	9.09719e-13	14
glut_neurons	Rasgef1b	7.21809e-17	1.28474	0.936	0.51	2.43221e-12	14
glut_neurons	Rorb	1.10932e-16	1.55613	0.596	0.172	3.73797e-12	14
glut_neurons	Chsy3	1.26941e-16	1.42991	0.957	0.592	4.2774e-12	14
glut_neurons	Kcnt2	1.54342e-16	1.21624	0.894	0.52	5.20072e-12	14
glut_neurons	Ntm	6.74215e-16	1.43945	1	0.881	2.27183e-11	14
glut_neurons	Stum	1.41386e-15	1.11828	0.83	0.418	4.76413e-11	14
glut_neurons	4930590L20Rik	1.50652e-15	1.05117	0.766	0.284	5.07637e-11	14
glut_neurons	Pex5l	1.58043e-15	1.20248	1	0.825	5.3254e-11	14
glut_neurons	Gpc6	1.97766e-15	1.69551	0.936	0.535	6.66393e-11	14
glut_neurons	Pde4d	5.43294e-14	1.1573	1	0.878	1.83068e-09	14
glut_neurons	Runx2	7.52634e-14	1.09115	0.915	0.478	2.53608e-09	14
glut_neurons	Ldlrad4	2.42668e-13	1.0238	0.936	0.669	8.17695e-09	14
glut_neurons	Gm37459	4.32952e-13	1.04618	0.957	0.586	1.45887e-08	14
glut_neurons	Grm8	6.83683e-13	1.05737	0.936	0.549	2.30374e-08	14
glut_neurons	Slc2a13	9.85137e-13	1.15519	0.936	0.582	3.31952e-08	14
glut_neurons	Nfib	1.98061e-12	1.10114	0.936	0.56	6.67386e-08	14
glut_neurons	Bcl11a	2.44704e-12	1.07729	0.766	0.357	8.24556e-08	14
glut_neurons	Klhl29	2.46607e-12	1.00441	0.957	0.712	8.30966e-08	14
glut_neurons	4930419G24Rik	3.69222e-12	1.02871	0.979	0.714	1.24413e-07	14
glut_neurons	Il1rapl2	2.04678e-11	1.25836	0.872	0.477	6.89682e-07	14
glut_neurons	Hs6st3	2.19942e-11	1.35585	0.894	0.622	7.41116e-07	14
glut_neurons	Tox	4.34181e-10	1.15906	0.723	0.348	1.46301e-05	14

## Sheet: Table_S5_gaba_cluster_markers
cell_type	gene	p_val	avg_log2FC	pct.1	pct.2	p_val_adj	cluster
gaba_neurons	Dscam	1.1367870815991994e-250	1.043392889408143	0.939	0.597	3.830517750156662e-246	0
gaba_neurons	Fign	2.4763594587398983e-221	1.214991016509954	0.454	0.108	8.34434083216996e-217	0
gaba_neurons	Tshz2	1.8916878764510037e-214	1.1346423114683297	0.751	0.33	6.374231468489302e-210	0
gaba_neurons	Gm32647	1.29176839421472e-71	1.5556741180324778	0.379	0.179	4.352742781145921e-67	0
gaba_neurons	Foxp2	0	2.772218315402527	0.96	0.166	0	1
gaba_neurons	Chst9	0	2.7189919931980553	0.77	0.052	0	1
gaba_neurons	6530403H02Rik	0	2.3705309455050805	0.677	0.103	0	1
gaba_neurons	Pbx3	0	2.2932138793064274	0.946	0.344	0	1
gaba_neurons	Htr1f	0	2.029534125598505	0.889	0.383	0	1
gaba_neurons	Gm45680	0	1.8585812239359096	0.6	0.023	0	1
gaba_neurons	Meis2	0	1.8380963717812997	0.991	0.471	0	1
gaba_neurons	Kcnh5	0	1.7745602599968997	0.757	0.236	0	1
gaba_neurons	Grm8	0	1.7197127809290267	0.963	0.583	0	1
gaba_neurons	Tshz1	0	1.7053020961071992	0.675	0.121	0	1
gaba_neurons	Kcnd2	0	1.5413974496945055	0.996	0.937	0	1
gaba_neurons	B020031H02Rik	0	1.4517370470789914	0.478	0.018	0	1
gaba_neurons	Sphkap	1.2320276876279278e-307	1.6628824131007196	0.852	0.419	4.151440496231065e-303	1
gaba_neurons	Trpm3	3.682090044506636e-303	1.6222352709563284	0.936	0.536	1.2407170613969562e-298	1
gaba_neurons	C79798	5.461909750659614e-283	1.2938828704329581	0.574	0.126	1.8404451095822636e-278	1
gaba_neurons	Erbb4	3.2249490644308837e-255	1.222748551861085	0.995	0.721	1.0866788367506305e-250	1
gaba_neurons	Inpp4b	5.184740531263843e-247	1.3005711597050729	0.92	0.545	1.7470501694146646e-242	1
gaba_neurons	Cpne4	6.371925733996356e-237	1.5341825994002631	0.776	0.339	2.147084095327412e-232	1
gaba_neurons	B3galt1	8.666343454494739e-236	1.1654639447110875	0.956	0.798	2.9202110904265473e-231	1
gaba_neurons	Lrp1b	7.313996174353297e-235	1.1244209126890272	0.993	0.882	2.464524150910087e-230	1
gaba_neurons	Schip1	1.4164209944625892e-227	1.275145782900672	0.954	0.732	4.7727721829411405e-223	1
gaba_neurons	Pde4b	1.3975458633576737e-210	1.263703984461236	0.927	0.638	4.709170541170017e-206	1
gaba_neurons	Epha6	1.5715328255873577e-206	1.1299850577143498	0.986	0.839	5.295437009099161e-202	1
gaba_neurons	Ntng1	5.575104330897363e-204	1.1523906177355359	0.823	0.39	1.8785871553391754e-199	1
gaba_neurons	Olfm3	7.896785022231628e-193	1.3299569322345377	0.789	0.42	2.6609006810911692e-188	1
gaba_neurons	Otof	6.752875064070549e-187	1.0883954121243051	0.508	0.145	2.2754487815892123e-182	1
gaba_neurons	Msra	3.862097611282372e-182	1.1596281699215854	0.759	0.382	1.301372411097708e-177	1
gaba_neurons	Slc35f1	3.952941022980587e-180	1.1220140194430255	0.93	0.747	1.3319830071035386e-175	1
gaba_neurons	Oprm1	6.28673814320076e-178	1.2127277123146387	0.71	0.341	2.1183792847329282e-173	1
gaba_neurons	Ankfn1	1.3662115805411635e-153	1.183039067873988	0.717	0.35	4.603586541791505e-149	1
gaba_neurons	Pex5l	2.9787021303548596e-140	1.132457966854762	0.828	0.606	1.0037034698443734e-135	1
gaba_neurons	8030451O07Rik	5.050325475759037e-137	1.0486880674795838	0.759	0.45	1.701757672311765e-132	1
gaba_neurons	Vwc2l	1.6642723209907677e-93	1.0708851695200465	0.494	0.23	5.607932012810491e-89	1
gaba_neurons	Nxph1	0	2.592414315213363	0.979	0.374	0	2
gaba_neurons	Sox6	0	1.9752692163850087	0.908	0.249	0	2
gaba_neurons	Kcnmb2	0	1.9680606716027933	0.898	0.229	0	2
gaba_neurons	Zeb2	0	1.7193147977456509	0.876	0.253	0	2
gaba_neurons	Moxd1	0	1.4058816910695688	0.6	0.09	0	2
gaba_neurons	Sox5os4	1.9556069983051782e-299	1.4595683763675753	0.533	0.07	6.589613341489128e-295	2
gaba_neurons	Tcf4	1.925234054370911e-295	1.8388336450832363	0.989	0.58	6.487268669608221e-291	2
gaba_neurons	Col19a1	1.6833098009706464e-261	1.5607519274771868	0.617	0.122	5.67208070535069e-257	2
gaba_neurons	Gm56750	7.618617914298923e-255	1.3668032677809194	0.648	0.144	2.5671694924021653e-250	2
gaba_neurons	Dlgap2	4.129007620903109e-241	1.361108986707312	0.976	0.9	1.3913104079395116e-236	2
gaba_neurons	Sox5	6.8771047338412e-240	1.559429519828055	0.803	0.253	2.3173092111151308e-235	2
gaba_neurons	6330576A10Rik	1.2769821345899901e-232	1.20078	0.57	0.114	4.302919000714431e-228	2
gaba_neurons	Maf	1.4420060932100017e-231	1.3186598000565923	0.65	0.157	4.858983731680421e-227	2
gaba_neurons	Gria4	4.0024367845623476e-218	1.261989460035771	0.983	0.923	1.3486610989261287e-213	2
gaba_neurons	Grip1	1.742966552191063e-215	1.1600848002768336	0.987	0.917	5.873100094263006e-211	2
gaba_neurons	Etl4	2.2350401560548933e-209	1.565720587239125	0.961	0.732	7.531191309842568e-205	2
gaba_neurons	Cntnap4	1.9407150911780264e-203	1.4120749704500453	0.828	0.334	6.539433571233478e-199	2
gaba_neurons	Tmem132cos	7.051922879114674e-202	1.3736935831191346	0.521	0.11	2.3762159333464807e-197	2
gaba_neurons	Fgf1	3.1782996050643955e-183	1.3121252251911069	0.789	0.307	1.0709598349224987e-178	2
gaba_neurons	Cntnap3	6.007667759905406e-178	1.0010999056834449	0.544	0.133	2.0243437283777256e-173	2
gaba_neurons	Tmem132c	2.388546127507413e-176	1.3014375929010822	0.529	0.131	8.048445031248979e-172	2
gaba_neurons	Alk	9.852309436310582e-175	1.1923719584640653	0.847	0.365	3.319834187659214e-170	2
gaba_neurons	Tafa2	2.5323032904185483e-163	1.3208493027239543	0.879	0.509	8.532849167394341e-159	2
gaba_neurons	Klf12	2.4257212900352867e-159	1.1369250506448498	0.945	0.718	8.173710458902901e-155	2
gaba_neurons	Il1rapl2	2.931568325299339e-158	2.8685158275163962	0.601	0.216	9.878212628928652e-154	2
gaba_neurons	Kcnip1	1.4335300719283878e-156	1.2257910473351625	0.824	0.395	4.830422930369895e-152	2
gaba_neurons	Rab3b	4.850631647845359e-155	1.0669804880035039	0.515	0.137	1.6344688400579722e-150	2
gaba_neurons	Gm13963	1.0441651099226363e-150	1.0496707879118103	0.503	0.134	3.518418754395315e-146	2
gaba_neurons	Kcnc2	9.921397322069654e-150	1.658626095872938	0.871	0.603	3.343114041644591e-145	2
gaba_neurons	Klhl32	6.5572115986746045e-146	1.1833222204657394	0.775	0.393	2.2095180202893947e-141	2
gaba_neurons	Ndst4	3.028610815145278e-143	1.4687017474860418	0.503	0.146	1.0205207002713529e-138	2
gaba_neurons	9630014M24Rik	8.0506966479064185e-140	1.0058136920072562	0.654	0.238	2.7127627424785467e-135	2
gaba_neurons	Fmn1	2.2879687959907896e-139	1.086797964377166	0.547	0.179	7.709539654970565e-135	2
gaba_neurons	Rbms3	4.298406495289993e-130	1.0155520131741467	0.93	0.679	1.4483910526529159e-125	2
gaba_neurons	Srrm4	2.665100021144952e-128	1.1300165182736475	0.774	0.407	8.98032103125003e-124	2
gaba_neurons	Elavl2	5.239562772109899e-125	1.0564649058226934	0.843	0.474	1.7655230716901515e-120	2
gaba_neurons	Vwc2	8.618044859430572e-122	1.0937618594785865	0.669	0.278	2.9039363958337257e-117	2
gaba_neurons	4930517O19Rik	2.4036473667380135e-115	1.0574985652605995	0.864	0.564	8.09933016696041e-111	2
gaba_neurons	Abtb3	6.008059468347587e-101	1.0715698866661263	0.616	0.277	2.024475718454403e-96	2
gaba_neurons	Cntnap5c	8.882760504800081e-100	1.350225462421042	0.715	0.398	2.9931349796974353e-95	2
gaba_neurons	Ptprt	7.487856988999257e-76	1.066931013859461	0.859	0.718	2.52310829101319e-71	2
gaba_neurons	Rarb	0	2.6506240761751014	0.928	0.155	0	3
gaba_neurons	Mhrt	0	1.5634884934177724	0.54	0.035	0	3
gaba_neurons	Arhgap10	0	1.273168297951417	0.589	0.085	0	3
gaba_neurons	Foxp1	2.4802773497931862e-300	1.985622282887016	0.956	0.619	8.35754255786312e-296	3
gaba_neurons	Pdzd2	1.6640729364155184e-296	1.9378910139891818	0.858	0.285	5.60726016654573e-292	3
gaba_neurons	Celf2	1.0491925808310172e-293	1.3113236875733367	0.999	0.987	3.5353593203681956e-289	3
gaba_neurons	Phactr1	9.821331088163145e-293	2.205935696223688	0.994	0.9	3.309395723467453e-288	3
gaba_neurons	Nrg1	3.639055333793189e-286	1.868017736195109	0.996	0.775	1.2262160852749529e-281	3
gaba_neurons	Drd2	2.7488764479722625e-275	1.1012397761323416	0.381	0.032	9.262614079087336e-271	3
gaba_neurons	Pde7b	1.2977412769312586e-266	1.9568955478383319	0.909	0.398	4.372869006747569e-262	3
gaba_neurons	Gm10754	2.7367651931105087e-266	1.5222296674460774	0.616	0.115	9.22180399470517e-262	3
gaba_neurons	Gng7	1.2558739759950269e-229	1.4143282808616902	0.731	0.23	4.231792949512843e-225	3
gaba_neurons	Camk4	1.2719207025406687e-222	1.5586449566829161	0.895	0.443	4.285863999281037e-218	3
gaba_neurons	Cacnb2	2.4773237434489002e-217	1.400693910991761	0.983	0.79	8.347590085925415e-213	3
gaba_neurons	Ryr3	4.4640792675306154e-210	1.3553797633123517	0.967	0.572	1.5042161499871162e-205	3
gaba_neurons	Adcy5	6.230987406742258e-210	1.3730345319905648	0.79	0.31	2.0995935165758713e-205	3
gaba_neurons	Slit3	2.9670138893553135e-204	1.411197069102764	0.885	0.385	9.997650001571664e-200	3
gaba_neurons	Rgs9	1.1582269373726977e-203	1.7162553338190765	0.67	0.21	3.9027614881710423e-199	3
gaba_neurons	Elmod1	7.070893768637293e-191	1.280079517637598	0.919	0.552	2.382608364280022e-186	3
gaba_neurons	Epha4	4.431651093643474e-190	1.1385400730329507	0.686	0.204	1.493289152514105e-185	3
gaba_neurons	Slc35f3	3.74472326886607e-187	1.233258793784837	0.928	0.519	1.2618219526771109e-182	3
gaba_neurons	Ppp1r2	2.550059703881917e-183	1.4238617455784564	0.802	0.373	8.592681178200508e-179	3
gaba_neurons	Tmtc1	8.091492582703076e-176	1.2231185252289947	0.745	0.288	2.7265093406676286e-171	3
gaba_neurons	Gm10848	6.668137906134491e-175	1.2423473887728482	0.734	0.27	2.246895748851078e-170	3
gaba_neurons	Dgkb	5.404517570622299e-172	1.121334777261561	0.986	0.845	1.82110624059689e-167	3
gaba_neurons	Kcnq5	3.8021039790891e-169	1.3002765108699514	0.972	0.701	1.2811569567938632e-164	3
gaba_neurons	Gnal	1.444631140671463e-168	1.1898075589507788	0.921	0.594	4.867829091606562e-164	3
gaba_neurons	Lmo7	3.060286516598492e-165	1.0652191853941089	0.684	0.231	1.0311941446330279e-160	3
gaba_neurons	Prkcb	3.856832236976622e-165	1.1639822561935098	0.955	0.748	1.2995981905716426e-160	3
gaba_neurons	Gm15810	1.6280528968298935e-158	1.088728338690426	0.572	0.167	5.485887041158009e-154	3
gaba_neurons	Meis2	3.703759443240903e-151	1.0638232371455585	0.987	0.503	1.2480187819944548e-146	3
gaba_neurons	Baiap2	3.6600047495315575e-148	1.0548412996958243	0.861	0.451	1.2332752004021536e-143	3
gaba_neurons	Ephb1	4.919242762852762e-148	1.076304164190208	0.737	0.286	1.6575880413708667e-143	3
gaba_neurons	Itpr1	2.8080272173212764e-143	1.1989502469022524	0.803	0.426	9.461928511485773e-139	3
gaba_neurons	Adk	4.393667124992384e-138	1.4300237205109818	0.72	0.349	1.4804900744374337e-133	3
gaba_neurons	Mctp1	3.1545056007749648e-136	1.2918707527841595	0.891	0.606	1.0629422072371322e-131	3
gaba_neurons	Gm13269	1.2665471604237815e-134	1.0682482828494575	0.775	0.365	4.267757311763974e-130	3
gaba_neurons	Cnksr2	4.512838002422262e-134	1.013854984061549	0.922	0.612	1.5206458932962053e-129	3
gaba_neurons	Slc4a4	2.5226636875432315e-131	1.2012716698752874	0.663	0.265	8.500367561545673e-127	3
gaba_neurons	Sgcz	7.077890078389499e-130	1.0418629480763553	0.983	0.811	2.3849658408141255e-125	3
gaba_neurons	Gm26713	2.501156782353101e-125	1.031592794452643	0.55	0.171	8.427897893817008e-121	3
gaba_neurons	Stox2	2.0843750898089436e-119	1.0369090111469008	0.868	0.604	7.0235103026202165e-115	3
gaba_neurons	Gm28376	7.660762038283904e-115	1.0249740094234525	0.673	0.274	2.5813703764201443e-110	3
gaba_neurons	Prkd1	2.583287970920851e-114	1.221379881040635	0.567	0.215	8.704647146814899e-110	3
gaba_neurons	Dach1	9.763473992242488e-110	1.0342271968529884	0.416	0.116	3.2899001964260286e-105	3
gaba_neurons	Pde1c	2.9565244527601894e-86	1.5437639313640892	0.54	0.218	9.962304796020734e-82	3
gaba_neurons	Htr4	5.0133724204383774e-85	1.0530722867561622	0.599	0.293	1.6893059707909155e-80	3
gaba_neurons	Hs6st3	3.855254021566701e-68	1.0747150374972172	0.729	0.439	1.2990663951071155e-63	3
gaba_neurons	Zfhx3	1.5254544479169374e-245	1.6355935923689644	0.904	0.329	5.140171307700912e-241	4
gaba_neurons	Rmst	1.4649993378895738e-209	1.3488211802937027	0.686	0.176	4.936461768952708e-205	4
gaba_neurons	Lhfpl3	6.013979350778243e-172	1.2523958271330793	0.967	0.633	2.026470482038237e-167	4
gaba_neurons	Ebf1	8.078020887321237e-147	1.7258053834908913	0.349	0.06	2.7219699181917642e-142	4
gaba_neurons	Sox6	3.276875893742715e-255	1.8635242882291025	0.923	0.27	1.1041761011555453e-250	5
gaba_neurons	Satb1	1.6106793737585204e-182	1.2177757164340641	0.596	0.132	5.42734521781671e-178	5
gaba_neurons	Kcnmb2	5.343088186752356e-180	1.505413422960126	0.832	0.257	1.8004069954080738e-175	5
gaba_neurons	Elfn1	8.443835006241692e-178	1.1715353522300433	0.539	0.112	2.8452346437032008e-173	5
gaba_neurons	Nxph1	2.7591963694862198e-176	1.575305666032187	0.937	0.398	9.297388086620766e-172	5
gaba_neurons	Grin3a	1.5842411986249623e-174	1.5819660682031882	0.836	0.344	5.3382591428866726e-170	5
gaba_neurons	4930509J09Rik	2.62499107246738e-174	1.6451718659426122	0.71	0.207	8.845169917786083e-170	5
gaba_neurons	Gm20754	2.85873141706495e-174	1.723879347202235	0.766	0.265	9.632781382942056e-170	5
gaba_neurons	Gm45025	3.246609095032438e-170	1.0277489791451329	0.517	0.098	1.0939774006621304e-165	5
gaba_neurons	L3mbtl4	5.780718896401076e-161	1.1700410557675598	0.411	0.068	1.9478710393313065e-156	5
gaba_neurons	Ptprm	8.580348255473094e-160	1.4658463996676452	0.921	0.444	2.8912341481642137e-155	5
gaba_neurons	Tcf4	4.415955549547456e-152	1.2835451903864987	0.996	0.593	1.488000381975511e-147	5
gaba_neurons	Moxd1	1.2894605428382444e-146	1.0402122679717873	0.518	0.114	4.3449662451477485e-142	5
gaba_neurons	Man1a	2.3135183615901383e-145	1.7357330581663326	0.692	0.25	7.79563147121413e-141	5
gaba_neurons	Tmem132c	1.1854065783324108e-137	1.2937681966942658	0.546	0.143	3.994346006348891e-133	5
gaba_neurons	Tmem132cos	4.213523283976127e-134	1.2593034462674364	0.513	0.124	1.4197888057685957e-129	5
gaba_neurons	Kcnc2	1.8458136441988033e-131	1.1653157078996883	0.958	0.604	6.219653655492288e-127	5
gaba_neurons	Tox	2.8709812525055987e-125	1.5804324028714078	0.736	0.317	9.674058428442866e-121	5
gaba_neurons	Frmd5	2.3739371412047835e-123	1.3021919846759396	0.963	0.727	7.999218591003638e-119	5
gaba_neurons	Kctd8	2.2574635778260335e-122	1.2206794669224517	0.839	0.389	7.606749271842602e-118	5
gaba_neurons	Nkain3	7.934747384521961e-122	1.2943078868545883	0.932	0.697	2.67369247868852e-117	5
gaba_neurons	Elavl2	1.09828954704237e-119	1.2648199766978638	0.876	0.484	3.7007964577139697e-115	5
gaba_neurons	Gria1	1.988603103640304e-116	1.0601154463101734	0.994	0.984	6.700797018026369e-112	5
gaba_neurons	Sox2ot	8.376183101180648e-115	1.764705768688927	0.946	0.738	2.822438657773831e-110	5
gaba_neurons	Col25a1	1.2795038088992047e-111	1.7138606892377002	0.756	0.398	4.31141603446676e-107	5
gaba_neurons	Klhl32	7.518211167259714e-110	1.217154872931898	0.786	0.405	2.5333364349198332e-105	5
gaba_neurons	Gm38505	2.6028963442205567e-108	1.9282779647842867	0.856	0.62	8.770719521485587e-104	5
gaba_neurons	Pcsk5	2.6533288636652435e-108	1.128557819715247	0.574	0.193	8.940656939006404e-104	5
gaba_neurons	Sntg2	9.560030002465979e-107	1.124460373862529	0.598	0.216	3.2213477096309362e-102	5
gaba_neurons	Utrn	1.11049107437106e-101	1.1844511981144694	0.705	0.323	3.741910724200724e-97	5
gaba_neurons	Vwc2	1.7097594792972784e-101	1.1977002575045503	0.679	0.29	5.76120554144011e-97	5
gaba_neurons	Alk	2.8281335377119546e-92	1.019460836535933	0.797	0.386	9.529678768674202e-88	5
gaba_neurons	Pip5k1b	7.173502382079488e-85	1.1065050827729186	0.766	0.431	2.4171833626655043e-80	5
gaba_neurons	Fstl5	2.0401301734263798e-79	1.0464256526078517	0.764	0.402	6.874422632377529e-75	5
gaba_neurons	Grm1	6.895555898085118e-76	1.034772136888392	0.797	0.511	2.3235265154187613e-71	5
gaba_neurons	Trpc6	7.744045402813076e-76	1.0365676434563746	0.47	0.17	2.609433538931894e-71	5
gaba_neurons	Cntnap4	8.250016810579792e-76	1.04061	0.714	0.36	2.779925664492967e-71	5
gaba_neurons	Grik1	2.134126783898804e-75	1.0256428981949495	0.836	0.47	7.19115361102541e-71	5
gaba_neurons	Etl4	1.6890046056475527e-71	1.616265099175541	0.86	0.749	5.691269919189994e-67	5
gaba_neurons	Spon1	1.9045141881988993e-70	1.3672030100807042	0.487	0.203	6.417451008555011e-66	5
gaba_neurons	Hs3st5	3.0341284196082953e-53	1.108031273875946	0.624	0.354	1.0223799122712111e-48	5
gaba_neurons	Ptprt	2.657042418912924e-39	1.0104287512984378	0.819	0.726	8.953170134768988e-35	5
gaba_neurons	Prkcd	0	1.5847355102438734	0.421	0.01	0	6
gaba_neurons	Spata13	1.684168116516202e-244	1.4379000941679239	0.6	0.096	5.674972885412995e-240	6
gaba_neurons	Zfhx3	6.867594609634949e-215	1.8295688717908687	0.926	0.344	2.3141046796625924e-210	6
gaba_neurons	Arhgap6	3.089689611426159e-205	2.42531	0.897	0.416	1.0411018114661586e-200	6
gaba_neurons	1700042O10Rik	3.0088154723010804e-198	1.3061962190431364	0.461	0.064	1.0138504615465721e-193	6
gaba_neurons	Pcsk6	4.2412788718016807e-178	1.1191156531159274	0.469	0.075	1.4291413286422943e-173	6
gaba_neurons	Dock10	3.572792489094578e-172	1.960957424662261	0.907	0.545	1.2038881571253089e-167	6
gaba_neurons	Gm15261	4.638871794374899e-167	1.911386968952647	0.913	0.447	1.563114239832566e-162	6
gaba_neurons	Slc35f3	7.183534130641495e-137	1.5125126354703935	0.901	0.535	2.4205636606609583e-132	6
gaba_neurons	Ankfn1	9.667629727498345e-135	1.6104811975475637	0.823	0.375	3.2576045129778425e-130	6
gaba_neurons	Lrrc1	1.1493713477857572e-132	1.1033890380690572	0.525	0.13	3.8729216934988877e-128	6
gaba_neurons	Sox5	1.7825490255252007e-129	1.724330343275494	0.718	0.281	6.006477196409716e-125	6
gaba_neurons	Camk2d	6.858722819217165e-118	1.2200333772879106	0.928	0.685	2.311115241163416e-113	6
gaba_neurons	Mbnl1	2.9998901758555654e-114	1.3434973571719833	0.736	0.34	1.0108429936562913e-109	6
gaba_neurons	Fstl4	4.226241995673228e-113	1.2696913465002737	0.785	0.35	1.424074502862051e-108	6
gaba_neurons	Epb41l4b	1.6740188153025905e-110	1.368142740617123	0.767	0.392	5.640773800043609e-106	6
gaba_neurons	Cntn3	1.766007616240696e-110	1.2192418724964071	0.891	0.569	5.950739263684649e-106	6
gaba_neurons	Pdzrn4	2.998671164766649e-109	1.1780728513005596	0.942	0.653	1.0104322356797701e-104	6
gaba_neurons	Kcnq5	5.222176870813549e-109	1.1840086960596876	0.974	0.71	1.7596647183893334e-104	6
gaba_neurons	Pde7b	2.552838393832391e-108	1.2964285560055138	0.809	0.423	8.602044251857625e-104	6
gaba_neurons	D030068K23Rik	1.8277246168569482e-100	1.1454276245435584	0.819	0.395	6.158700868961173e-96	6
gaba_neurons	Vat1l	6.526456591845973e-98	1.2686278102524704	0.777	0.425	2.199154813188419e-93	6
gaba_neurons	Tmcc3	1.0981241685288345e-96	1.6256191901896184	0.7	0.329	3.7002391982747605e-92	6
gaba_neurons	Rps6ka2	1.3105810285673327e-85	1.1275784518733722	0.672	0.325	4.416133833860484e-81	6
gaba_neurons	Camk4	1.5145575822215742e-85	1.279154073159126	0.797	0.465	5.103453229053816e-81	6
gaba_neurons	Tiam1	8.506712390416148e-84	1.1029661538782953	0.859	0.652	2.8664218070746254e-79	6
gaba_neurons	Rap1gap	1.3004008108581174e-79	1.0382448887745892	0.714	0.376	4.3818305722675124e-75	6
gaba_neurons	Ghr	6.475942030381467e-70	1.106549714154339	0.596	0.268	2.182133426557339e-65	6
gaba_neurons	Hdac9	2.3977011626192643e-64	1.7824582951333303	0.801	0.605	8.079293837561873e-60	6
gaba_neurons	Galnt17	1.0765479375642368e-49	1.0253925532355077	0.724	0.488	3.6275359304164526e-45	6
gaba_neurons	Cyp19a1	7.289464884914901e-169	1.329748965374376	0.284	0.023	2.456258087620925e-164	7
gaba_neurons	Esr2	1.4542771835642198e-143	1.0482211019388903	0.249	0.021	4.900332397737995e-139	7
gaba_neurons	Prlr	5.055706636702157e-68	1.0826712818686772	0.459	0.16	1.703570908303159e-63	7
gaba_neurons	Grik1	1.752969717169549e-63	1.2475172588795136	0.821	0.475	5.906806758974512e-59	7
gaba_neurons	Reln	4.8210765930686703e-32	1.640855104670721	0.38	0.178	1.624509968800419e-27	7
gaba_neurons	Dlx6os1	3.656263108869149e-21	1.030384428806371	0.727	0.582	1.2320144171645486e-16	7
gaba_neurons	Rgs12	0	1.677306535089847	0.59	0.051	0	8
gaba_neurons	Npas1	0	1.4347844587469596	0.549	0.037	0	8
gaba_neurons	4930447N08Rik	2.53465781937318e-300	1.5574295426285567	0.483	0.035	8.540782988159867e-296	8
gaba_neurons	Adarb2	3.9196564612359604e-263	3.4874366689008824	1	0.485	1.3207674411780692e-258	8
gaba_neurons	Npas3	1.0993547876105732e-250	3.096521795700413	0.99	0.487	3.7043858923325874e-246	8
gaba_neurons	Synpr	2.971423436507453e-247	2.514155212040725	0.939	0.325	1.0012508411655514e-242	8
gaba_neurons	Gm5087	8.908349263938614e-242	1.2709484348598399	0.352	0.021	3.0017573679767557e-237	8
gaba_neurons	Pde5a	7.911738743865217e-209	1.108143640940932	0.371	0.031	2.6659394871328235e-204	8
gaba_neurons	Zeb2	5.530568867779635e-208	2.022331244279378	0.905	0.284	1.863580485687026e-203	8
gaba_neurons	Zbtb16	1.2072254442012014e-204	1.939501051458775	0.83	0.25	4.067866856780368e-200	8
gaba_neurons	Zfp536	3.9634961192988792e-202	1.8557416354790812	0.896	0.267	1.3355396523589503e-197	8
gaba_neurons	Adra1b	4.805931702362959e-195	1.2212320012024558	0.367	0.033	1.6194067464282225e-190	8
gaba_neurons	Cnr1	6.965932991608348e-195	1.982512744212018	0.738	0.201	2.347240780852349e-190	8
gaba_neurons	Grip1	1.0834958848615301e-166	2.129147944507901	0.993	0.92	3.650947733629412e-162	8
gaba_neurons	Frem1	1.0841390926880557e-158	1.353255158154811	0.284	0.023	3.653115086721672e-154	8
gaba_neurons	Igf1	1.7298309632489878e-154	1.1689192601331593	0.386	0.049	5.828838413763789e-150	8
gaba_neurons	Nrxn1	9.74530164241605e-149	1.0392836879854928	1	0.985	3.283776841428512e-144	8
gaba_neurons	Dlx6os1	3.759518979771427e-148	1.954217850015136	0.944	0.569	1.2668075154237802e-143	8
gaba_neurons	Galntl6	1.388506719706018e-143	1.7917397414672616	0.99	0.803	4.678712242721398e-139	8
gaba_neurons	Tcf4	2.5261878694612946e-142	1.513580584867031	0.995	0.601	8.512242644936778e-138	8
gaba_neurons	Zmat4	2.303040066052108e-135	1.719673035654692	0.83	0.348	7.760323806569184e-131	8
gaba_neurons	Pdzrn3	2.0983444477902297e-132	1.5520266366436335	0.493	0.1	7.070581451273958e-128	8
gaba_neurons	Nrxn3	1.827299057803291e-128	1.0863008933499358	1	0.998	6.15726690517397e-124	8
gaba_neurons	Adam12	1.7162581141772257e-120	1.4394304690675077	0.524	0.129	5.78310334153158e-116	8
gaba_neurons	Grip1os2	5.198258378788453e-118	1.8121776991610405	0.842	0.483	1.7516051433165572e-113	8
gaba_neurons	Svil	2.4991464165624915e-111	1.131992852334418	0.34	0.055	8.421123765248971e-107	8
gaba_neurons	Sorcs3	2.322204750065286e-110	1.400904856114121	0.915	0.563	7.824901125819988e-106	8
gaba_neurons	Abtb3	1.6286836459354286e-107	1.2877104641724133	0.733	0.287	5.48801241334402e-103	8
gaba_neurons	Nbea	2.442147701354551e-104	1.0063143254575038	0.976	0.932	8.229060894484296e-100	8
gaba_neurons	Prox1	5.023375742979654e-100	1.1289740932064758	0.369	0.071	1.692676690354424e-95	8
gaba_neurons	Ubash3b	5.83811280490068e-97	1.2273700065749025	0.714	0.29	1.9672104907393332e-92	8
gaba_neurons	Gm47027	6.918947924224317e-92	1.286623903659299	0.65	0.271	2.331408692546626e-87	8
gaba_neurons	Slc44a5	5.418955119457409e-91	1.7727802751743662	0.733	0.38	1.8259711170523686e-86	8
gaba_neurons	Kcnt2	4.395504149510434e-90	1.6959786887128798	0.699	0.313	1.4811090782190356e-85	8
gaba_neurons	Egfem1	2.336804918786173e-88	1.434731824765263	0.835	0.413	7.874097854341889e-84	8
gaba_neurons	Nr3c2	5.180425839024612e-84	1.423303299939967	0.818	0.537	1.7455962907177334e-79	8
gaba_neurons	Nfib	1.9796110472506705e-83	1.2018579121325004	0.779	0.358	6.670497384815859e-79	8
gaba_neurons	Vip	1.2152089861243699e-82	1.4031800819806501	0.335	0.073	4.0947681996446766e-78	8
gaba_neurons	Kcnq5	1.281703594891432e-79	1.2172530058469544	0.959	0.714	4.3188284333461693e-75	8
gaba_neurons	Ptprz1	7.303823368356984e-79	1.3982914287778576	0.823	0.504	2.461096322201569e-74	8
gaba_neurons	Cadps2	1.0885233589391506e-78	2.240720099326496	0.655	0.321	3.6678883102813615e-74	8
gaba_neurons	Kcnip1	8.330425405682282e-77	1.3699425120366955	0.76	0.422	2.807020144698702e-72	8
gaba_neurons	Slc2a13	1.1407566116712634e-73	1.2105903188119154	0.903	0.675	3.8438934786874893e-69	8
gaba_neurons	Dlx1as	1.541494462022802e-73	1.1841172388947308	0.566	0.215	5.194219739232034e-69	8
gaba_neurons	Tcf12	1.331049501753272e-67	1.0601769252427693	0.835	0.575	4.485104401107825e-63	8
gaba_neurons	Grip1os1	4.3303667148721387e-67	1.00249	0.471	0.166	1.459160368243316e-62	8
gaba_neurons	Syt6	4.424119349035671e-66	1.097379023620309	0.352	0.093	1.4907512558510596e-61	8
gaba_neurons	Ablim1	9.493247608272151e-65	1.0277892290205295	0.813	0.581	3.198844714083384e-60	8
gaba_neurons	Cntnap5c	1.1447359068992415e-64	1.0903924205997817	0.782	0.411	3.857302111887684e-60	8
gaba_neurons	Reln	3.9169540529534106e-64	1.1197066432428902	0.485	0.172	1.3198568376831813e-59	8
gaba_neurons	Plpp4	4.493314571824799e-64	1.226626280934138	0.274	0.061	1.514067278122084e-59	8
gaba_neurons	Sobp	6.754900629780027e-59	1.058817304472714	0.825	0.581	2.276131316210678e-54	8
gaba_neurons	Chrna7	7.419076358419599e-58	1.0202301645251617	0.488	0.188	2.499931969733068e-53	8
gaba_neurons	4930590L20Rik	1.5987885167077028e-57	1.1227325252141462	0.417	0.143	5.387277785898275e-53	8
gaba_neurons	Thsd7a	3.29807074377342e-55	1.3800882198154263	0.738	0.422	1.1113179178218917e-50	8
gaba_neurons	Egfr	5.575662198224424e-54	1.0792986892125187	0.277	0.068	1.878775134313702e-49	8
gaba_neurons	Col19a1	1.727179804967852e-51	1.5676690620191251	0.425	0.16	5.819905070819675e-47	8
gaba_neurons	Nrg3	9.12746212488255e-46	1.1468038343610445	0.985	0.953	3.075589637600424e-41	8
gaba_neurons	Shisa6	2.2196066374894433e-44	1.0824558615738908	0.619	0.339	7.479186525684428e-40	8
gaba_neurons	Oxr1	8.094228069367986e-44	1.1271972268642454	0.845	0.703	2.7274310902542368e-39	8
gaba_neurons	Parm1	2.421097122093294e-41	1.1540153666826125	0.439	0.191	8.158128862605563e-37	8
gaba_neurons	Dlc1	4.018831325688736e-40	1.047201123741441	0.675	0.415	1.3541854035040765e-35	8
gaba_neurons	Gm12296	5.6068153902102505e-40	1.0984892168781164	0.517	0.257	1.889272513885246e-35	8
gaba_neurons	Nrg3os	2.486449782619185e-38	1.127376372686495	0.944	0.811	8.378341187513607e-34	8
gaba_neurons	Trpm3	4.4330627765603585e-37	1.0833191113278327	0.799	0.586	1.4937648331897785e-32	8
gaba_neurons	Gm20642	5.731184871009193e-35	1.093576843791018	0.913	0.799	1.931180054135258e-30	8
gaba_neurons	Prkca	9.832457247650927e-16	1.2779906856711898	0.641	0.569	3.3131447941684564e-11	8
gaba_neurons	Egfr	8.723962880977137e-283	2.157653603893321	0.767	0.061	2.939626532374056e-278	9
gaba_neurons	Egfros	5.417629947572215e-238	1.4857312016538398	0.513	0.028	1.8255245871339335e-233	9
gaba_neurons	Hcrtr2	1.7278038678137107e-233	1.9358903095029867	0.672	0.058	5.8220079129850796e-229	9
gaba_neurons	Hapln1	4.759410197101051e-229	1.5315116470979233	0.455	0.023	1.6037308600151702e-224	9
gaba_neurons	Kit	4.465357892305074e-217	2.0726461287044966	0.661	0.063	1.5046469953911176e-212	9
gaba_neurons	Ndnf	1.2455111797554666e-164	1.4608391174959738	0.386	0.024	4.1968744713040205e-160	9
gaba_neurons	Gm27234	2.907262422317872e-151	1.129250992709335	0.386	0.027	9.796311458242301e-147	9
gaba_neurons	Zfp536	1.7523880247402111e-150	2.6872538077248604	0.974	0.286	5.904846688164615e-146	9
gaba_neurons	Fgf13	1.0124419147557277e-119	2.9227249402749145	0.989	0.524	3.4115242759609003e-115	9
gaba_neurons	Gm28153	1.0705225877189339e-117	1.4765323290389776	0.566	0.084	3.60723291157772e-113	9
gaba_neurons	Igsf11	1.4891148848311979e-117	1.8896520241358525	0.81	0.208	5.0177215159272045e-113	9
gaba_neurons	Zmat4	4.614741272952495e-115	2.3769649693642148	0.947	0.36	1.5549832193340727e-110	9
gaba_neurons	Grin2a	3.642888396786981e-106	2.243905414073174	0.995	0.782	1.227507674181341e-101	9
gaba_neurons	Cacna2d1	1.081982156838495e-105	2.3881573261258913	0.989	0.559	3.645847075682993e-101	9
gaba_neurons	Crispld1	6.4923153170044615e-105	1.2483202556802306	0.444	0.056	2.1876505692178235e-100	9
gaba_neurons	Zbtb16	3.0295975886611756e-103	1.7392689149731946	0.868	0.268	1.0208532034752698e-98	9
gaba_neurons	Nfib	1.5956463445353916e-97	1.8905783700749836	0.937	0.368	5.3766899225464555e-93	9
gaba_neurons	Sema5a	2.818857912505352e-95	1.6589755171002452	0.725	0.183	9.498423621978035e-91	9
gaba_neurons	Unc5c	1.4524146965970229e-93	2.223380511861973	0.995	0.687	4.8940565616533284e-89	9
gaba_neurons	Alk	3.727557298487829e-91	1.9673409936620514	0.931	0.403	1.256037707298459e-86	9
gaba_neurons	Rims1	1.958606856144106e-88	1.547439071192895	0.989	0.932	6.59972166246318e-84	9
gaba_neurons	Adamts17	4.9982712653206936e-86	1.5998437199945799	0.788	0.247	1.684217485562461e-81	9
gaba_neurons	Il1rap	1.4451415078420376e-84	1.4349621364874088	0.677	0.175	4.86954882482453e-80	9
gaba_neurons	Dlc1	1.311237235825651e-83	2.071243189065666	0.899	0.418	4.418344989838114e-79	9
gaba_neurons	Gm3764	3.1226305538051484e-83	1.509574969122184	0.825	0.294	1.0522015914101828e-78	9
gaba_neurons	Pde11a	1.2973673489788022e-82	1.5665148815726013	0.55	0.108	4.371609019118972e-78	9
gaba_neurons	Zeb2	5.383236017190296e-82	1.6031808788821154	0.899	0.305	1.813935208352442e-77	9
gaba_neurons	Gabbr2	1.764043860152109e-79	1.6568969225101364	0.937	0.592	5.944122191168547e-75	9
gaba_neurons	Dlx6os1	1.6559619419987284e-78	1.9446755304946977	0.979	0.581	5.5799293597589156e-74	9
gaba_neurons	Gm20319	9.605956036627733e-77	1.4212779575749699	0.677	0.178	3.236822946102081e-72	9
gaba_neurons	Cdh20	2.0085067470083834e-76	1.3204226088757007	0.593	0.132	6.767864334719449e-72	9
gaba_neurons	Reln	2.22450410526992e-75	2.9053902130547398	0.646	0.178	7.495689033117522e-71	9
gaba_neurons	Igf1	1.1855683181705038e-72	1.0359372675411231	0.392	0.06	3.994891004907329e-68	9
gaba_neurons	Nyap2	1.381827877568175e-72	1.6630295916464026	0.947	0.632	4.656207216253723e-68	9
gaba_neurons	Ptprm	1.776913730124133e-72	1.811753302818133	0.926	0.469	5.987488505026278e-68	9
gaba_neurons	Mpdz	1.1545926165442512e-71	1.4551857579408407	0.762	0.271	3.890515280707509e-67	9
gaba_neurons	Myo3b	2.756229633002987e-69	1.2141499157246614	0.328	0.045	9.287391371366866e-65	9
gaba_neurons	Erbb4	2.795890071317911e-69	1.5661821500562656	0.995	0.758	9.421031184312833e-65	9
gaba_neurons	Slc2a13	5.278439411657887e-67	1.425511213206935	0.963	0.681	1.7786229441522417e-62	9
gaba_neurons	Egfem1	6.393612984912041e-67	1.609156076573985	0.921	0.424	2.154391831395961e-62	9
gaba_neurons	Lamp5	3.514837014959477e-66	1.1298439610704245	0.556	0.134	1.1843594805607453e-61	9
gaba_neurons	Dab1	1.0976063275019437e-65	1.4149649538042435	0.979	0.81	3.69849428115055e-61	9
gaba_neurons	Nfix	2.5995853402591164e-65	1.1168520959067718	0.524	0.12	8.759562762537119e-61	9
gaba_neurons	Grik1	4.657450512367453e-65	1.7907257739732039	0.947	0.486	1.5693745246473368e-60	9
gaba_neurons	Pip5k1b	2.4940415725042957e-63	1.5752143937240248	0.862	0.446	8.403922482710475e-59	9
gaba_neurons	Dscaml1	4.888415408464062e-63	1.4877447927479097	0.931	0.635	1.64720045603605e-58	9
gaba_neurons	Gabrb2	6.096632241075982e-62	1.5069317295033564	0.931	0.602	2.0543211999529627e-57	9
gaba_neurons	Tcf4	4.7088912535145243e-60	1.3909953358853793	0.989	0.615	1.5867079967842542e-55	9
gaba_neurons	Mir99ahg	1.2561956134367753e-58	1.209154452152581	0.984	0.673	4.232876739036558e-54	9
gaba_neurons	Nxph1	2.789424611506896e-58	1.1910857325284057	0.974	0.425	9.399245170933637e-54	9
gaba_neurons	Pld5	1.1139309069830918e-57	1.225817270223185	0.661	0.203	3.7535015841702262e-53	9
gaba_neurons	Mgll	4.182491540064801e-55	1.2186281440101014	0.656	0.227	1.4093323493402354e-50	9
gaba_neurons	Tox3	1.8149967390338166e-54	1.3342191186671781	0.672	0.243	6.115813011848349e-50	9
gaba_neurons	Slc6a1	2.9659114943620215e-54	1.3483688188533947	0.836	0.453	9.993935371402268e-50	9
gaba_neurons	Frmpd4	3.0596604152615984e-54	1.5286943554823749	0.984	0.841	1.0309831735265481e-49	9
gaba_neurons	Dlx1as	4.1590101688890305e-54	1.1793345011968621	0.672	0.224	1.4014200665088477e-49	9
gaba_neurons	Rasgrf2	2.751225978330291e-52	1.345669521139407	0.788	0.374	9.270531056581749e-48	9
gaba_neurons	Kctd16	1.2888729380703765e-51	1.6663158662093966	0.947	0.759	4.3429862521219406e-47	9
gaba_neurons	Maf	6.85520799896458e-51	1.0534569721553482	0.635	0.199	2.309930887331105e-46	9
gaba_neurons	Rapgef4	1.503159587001106e-50	1.1761655172766756	0.926	0.705	5.065046544358926e-46	9
gaba_neurons	A830018L16Rik	6.492725086788872e-50	1.318066172004417	0.899	0.596	2.1877886452443785e-45	9
gaba_neurons	Kcnn2	4.811764867443199e-49	1.5284123510760286	0.862	0.579	1.6213722897336602e-44	9
gaba_neurons	Homer2	2.5042127559343044e-48	1.0758253441730212	0.577	0.184	8.438195302396232e-44	9
gaba_neurons	Gad1	6.297588994649842e-48	1.2765910547154171	0.841	0.501	2.122035587637211e-43	9
gaba_neurons	Dner	5.440252993364668e-47	1.2382975884886087	0.884	0.592	1.8331476486441587e-42	9
gaba_neurons	Adarb2	7.762247578607798e-47	1.2570785741661807	0.889	0.505	2.615566944087684e-42	9
gaba_neurons	Qki	8.366791489636283e-46	1.2154317353471953	0.862	0.528	2.819274060347842e-41	9
gaba_neurons	Pam	1.339218793825114e-45	1.1570119705602662	0.921	0.618	4.5126316476731037e-41	9
gaba_neurons	Rimbp2	1.4224162059557982e-45	1.0744873572472982	0.878	0.552	4.792973647588658e-41	9
gaba_neurons	Gad2	5.614294384757458e-44	1.1213416463581687	0.884	0.647	1.891792635887873e-39	9
gaba_neurons	Sh3rf3	7.440211928443626e-44	1.1881343589414197	0.878	0.608	2.5070538114083644e-39	9
gaba_neurons	Ntrk2	7.812982016299282e-44	1.0222931617510511	0.995	0.833	2.632662420212206e-39	9
gaba_neurons	Pdzrn3	5.6992310432739935e-42	1.0236793947284994	0.434	0.115	1.9204128923416048e-37	9
gaba_neurons	Pde10a	7.677294271517871e-40	1.0615117843402038	0.979	0.797	2.586941077730662e-35	9
gaba_neurons	Pvt1	2.3821574409230667e-38	1.0331451534542806	0.783	0.416	8.026917712934366e-34	9
gaba_neurons	Nt5dc3	5.517472143908329e-38	1.043771594671413	0.481	0.158	1.8591674136113507e-33	9
gaba_neurons	Phka2	8.352148390812103e-38	1.0383664456372548	0.577	0.228	2.814339921768046e-33	9
gaba_neurons	Ptchd4	6.703190813695383e-36	1.05644	0.772	0.397	2.258707176582796e-31	9
gaba_neurons	Atrnl1	4.7089592744987785e-35	1.1565819846887773	0.815	0.603	1.5867309171351083e-30	9
gaba_neurons	Adra1a	1.008995340730239e-34	1.1113989785541143	0.646	0.294	3.399910700124613e-30	9
gaba_neurons	Asph	4.166294537183731e-31	1.1008239920779506	0.651	0.333	1.4038746072494299e-26	9
gaba_neurons	Trpc5	6.999540200924531e-31	1.157605577094783	0.725	0.359	2.3585650661035299e-26	9
gaba_neurons	Rapgef4os1	6.281031283964645e-25	1.0217599421093153	0.651	0.364	2.1164563014447268e-20	9
gaba_neurons	Galntl6	1.5623420378422636e-19	1.15541	0.952	0.81	5.264467730713292e-15	9
gaba_neurons	Mctp2	0	2.321142894501154	0.826	0.022	0	10
gaba_neurons	Gm28501	9.523509438521679e-250	2.014309742023566	0.75	0.035	3.209041740404265e-245	10
gaba_neurons	Nek7	5.1807682099671663e-188	2.096685333753609	0.837	0.064	1.7457116560305363e-183	10
gaba_neurons	Gm20658	3.005022442748182e-177	1.1952813590636326	0.424	0.014	1.0125723623084275e-172	10
gaba_neurons	Unc5b	8.512259867927993e-151	1.5362929911296201	0.576	0.035	2.868291085097017e-146	10
gaba_neurons	Gm34299	1.3946864973432472e-100	1.9918603405819169	0.804	0.115	4.699535621447806e-96	10
gaba_neurons	Sfta3-ps	3.787586614825929e-87	1.2211631695354412	0.511	0.047	1.2762651857317451e-82	10
gaba_neurons	Col26a1	3.98259204411679e-77	1.6414149157206324	0.674	0.103	1.3419742151855934e-72	10
gaba_neurons	4930447N08Rik	1.2280856002770889e-74	1.0409789722958473	0.522	0.055	4.138157238693679e-70	10
gaba_neurons	Trps1	2.2610965149861963e-70	2.96068	0.989	0.41	7.618990816897487e-66	10
gaba_neurons	Kcnmb2	1.757138784630559e-68	2.230831922892844	0.989	0.293	5.9208548486911314e-64	10
gaba_neurons	4921534H16Rik	2.4843021728291205e-68	1.862105279879028	0.815	0.176	8.371104601565005e-64	10
gaba_neurons	Zfp804b	1.0112173257467488e-67	3.268650509940547	1	0.479	3.407397900836245e-63	10
gaba_neurons	Pde11a	2.861969547602342e-67	1.7343477187430083	0.674	0.113	9.643692587600851e-63	10
gaba_neurons	Ahr	2.9414727244791935e-67	1.2906950397986678	0.533	0.069	9.91158649240509e-63	10
gaba_neurons	Osbpl3	1.8978145386250235e-66	1.7343570606221603	0.848	0.204	6.394875869350879e-62	10
gaba_neurons	Sdk1	7.504405971126871e-65	2.5497060873381576	0.978	0.367	2.5286846360309104e-60	10
gaba_neurons	Ano4	2.5575280079714873e-60	2.2521733864041833	0.967	0.444	8.617846375660724e-56	10
gaba_neurons	Epb41l4a	2.8443019165418943e-60	1.3057182190175305	0.63	0.107	9.584159737979568e-56	10
gaba_neurons	Crtac1	3.819969901321406e-60	1.8647262912702194	0.75	0.172	1.2871770579492611e-55	10
gaba_neurons	Angpt1	1.2839595542528623e-58	1.1613313910977745	0.446	0.054	4.326430114010445e-54	10
gaba_neurons	Zfp536	6.017269484280867e-58	1.9700352984632092	0.946	0.296	2.027579125423281e-53	10
gaba_neurons	Hs3st4	7.716120144078222e-58	1.9805019933204162	0.935	0.309	2.6000238437485976e-53	10
gaba_neurons	Rora	1.0275505609857042e-57	2.276104266972055	1	0.853	3.462434370297429e-53	10
gaba_neurons	Erbb4	5.100688655379752e-56	2.1694445326957377	1	0.761	1.7187280493167612e-51	10
gaba_neurons	Cntnap5b	5.341983366542491e-56	2.4203005409363345	1	0.61	1.8000347151901577e-51	10
gaba_neurons	Thsd7a	5.785937188887236e-55	2.3139874291984937	0.957	0.434	1.949629395167443e-50	10
gaba_neurons	Clstn2	2.0691761413700485e-52	2.4768015161266828	0.967	0.475	6.972295925960515e-48	10
gaba_neurons	Zeb2	5.113613778381371e-52	1.6593853086527441	0.978	0.312	1.723083298763387e-47	10
gaba_neurons	Sox5os4	2.0606661679540486e-51	1.3105530516494879	0.62	0.114	6.943620719537962e-47	10
gaba_neurons	Fbn2	7.362281211198654e-50	1.237245852796867	0.554	0.098	2.4807942769254985e-45	10
gaba_neurons	Mical2	9.43828226967643e-50	1.744782907945743	0.913	0.367	3.18032359359017e-45	10
gaba_neurons	Inpp4b	7.284138586799675e-48	1.9506257766439905	0.989	0.599	2.4544633382080183e-43	10
gaba_neurons	Nyap2	7.888522275680798e-48	2.0351012436401934	0.967	0.636	2.6581164660134017e-43	10
gaba_neurons	Gpr176	2.05840407376523e-47	1.3663126464242228	0.761	0.204	6.935998366959319e-43	10
gaba_neurons	Astn2	3.7923366162259715e-47	2.0353006889907075	0.989	0.678	1.2778657462035034e-42	10
gaba_neurons	Fgf13	6.618988823116399e-45	1.7961680442153405	0.967	0.531	2.230334473837302e-40	10
gaba_neurons	Tafa2	3.254802997808074e-44	1.8764824937267215	0.978	0.544	1.0967384181414085e-39	10
gaba_neurons	Scn9a	6.749000147173798e-43	1.6211190913295241	0.913	0.39	2.274143089591683e-38	10
gaba_neurons	Sntg1	1.0403722306884663e-42	1.2589518511490376	1	0.931	3.505638268527856e-38	10
gaba_neurons	Plcxd3	1.4646879929438138e-41	1.8930860720109284	0.924	0.457	4.935412661023475e-37	10
gaba_neurons	Dip2a	2.44813264590683e-41	1.4839	0.804	0.277	8.249227763647654e-37	10
gaba_neurons	Sox5	1.6738779724547934e-39	1.420831498856436	0.891	0.305	5.640299215983671e-35	10
gaba_neurons	Pde3a	1.453495277401507e-38	1.3273236711109786	0.565	0.121	4.897697686732118e-34	10
gaba_neurons	Tmem44	3.118002156545127e-38	1.0790324088870897	0.533	0.111	1.050642006669446e-33	10
gaba_neurons	Ccdc136	3.769625174765689e-37	1.4336064128181103	0.761	0.264	1.2702128988890464e-32	10
gaba_neurons	Cntnap5c	3.950796844329435e-36	1.6175073982465176	0.924	0.426	1.3312605046652464e-31	10
gaba_neurons	Tacr1	7.119750789563919e-36	1.0414499403437019	0.554	0.124	2.399071226051458e-31	10
gaba_neurons	Kcnc1	1.5918271143695147e-35	1.5245715513428684	0.848	0.396	5.363820644579517e-31	10
gaba_neurons	Cntnap2	1.6885770889115284e-35	1.2684394103990133	1	0.975	5.689829358796287e-31	10
gaba_neurons	Lrrc4c	4.742338392748558e-35	1.2907060897423372	1	0.9	1.597978344820554e-30	10
gaba_neurons	Limch1	6.552789841003541e-35	1.426893404175296	0.967	0.678	2.2080280648245534e-30	10
gaba_neurons	Gm44129	8.37678828885726e-35	1.15423	0.543	0.127	2.8226425818133424e-30	10
gaba_neurons	Dlx1as	8.9620862799819e-35	1.2134422218146237	0.728	0.229	3.0198645929027008e-30	10
gaba_neurons	Dlc1	1.802423457005098e-34	1.2982802058279275	0.924	0.424	6.073446080724378e-30	10
gaba_neurons	Cemip	2.071869056574472e-34	1.2046776383761784	0.543	0.129	6.98136997303334e-30	10
gaba_neurons	Dlgap2	2.9883417974535445e-34	1.222491460657984	0.989	0.908	1.0069516520699463e-29	10
gaba_neurons	Maf	4.6697072841295087e-32	1.1180918372360833	0.696	0.204	1.5735045664602793e-27	10
gaba_neurons	Mef2c	9.345514397427858e-32	1.4505845593061668	0.946	0.705	3.149064531357291e-27	10
gaba_neurons	Man1c1	1.2918713446229775e-31	1.1334871884323323	0.63	0.188	4.353089682841585e-27	10
gaba_neurons	Ttc39b	3.678787798654491e-31	1.0118781802229884	0.598	0.173	1.2396043366346173e-26	10
gaba_neurons	Ptchd4	1.3287224785532513e-30	1.2693881615479115	0.891	0.401	4.477263263733036e-26	10
gaba_neurons	Nfib	9.136020221861507e-30	1.1539329330922254	0.891	0.376	3.0784733739584534e-25	10
gaba_neurons	Gm30439	1.0248645889840079e-29	1.270286405415196	0.652	0.214	3.453383719040513e-25	10
gaba_neurons	Alk	1.1158968559004973e-29	1.2196504221385318	0.913	0.411	3.760126045642316e-25	10
gaba_neurons	Nxph1	1.9759534886024667e-29	1.0837705223234013	1	0.433	6.658172875194872e-25	10
gaba_neurons	Snca	2.3873596529125143e-29	1.332249190503032	0.902	0.519	8.044447086454008e-25	10
gaba_neurons	Cdh12	5.196588920562502e-29	1.4179282573548873	0.793	0.326	1.7510426026727407e-24	10
gaba_neurons	Adcy8	1.2372652910970425e-28	1.2467690084166383	0.739	0.291	4.169089124880595e-24	10
gaba_neurons	Sh3rf3	2.2908894787526706e-28	1.3502763157516697	0.913	0.612	7.719381187604999e-24	10
gaba_neurons	Ptpre	4.724081979033946e-28	1.2172204477665074	0.707	0.261	1.5918266636552786e-23	10
gaba_neurons	Fmn1	8.46494758240446e-28	1.001249786934114	0.674	0.213	2.852348737367007e-23	10
gaba_neurons	Ank1	1.4626577248633228e-27	1.158002705139554	0.772	0.337	4.9285714696994524e-23	10
gaba_neurons	Fstl5	1.8355602821128403e-27	1.176002345974055	0.891	0.424	6.185103926607427e-23	10
gaba_neurons	Galntl6	1.3532313797526132e-26	1.1934070989868193	1	0.812	4.559848457214406e-22	10
gaba_neurons	Rbms3	4.1691342230246115e-26	1.1898998490108212	0.989	0.702	1.4048314677903731e-21	10
gaba_neurons	Tcf4	4.9712281083858335e-26	1.160274352435179	1	0.62	1.6751050234016906e-21	10
gaba_neurons	Kcnc2	1.8490388023607627e-25	1.0694965460601287	0.978	0.627	6.230521148434826e-21	10
gaba_neurons	Cacna2d3	3.8769876091848004e-25	1.0121227942441173	1	0.756	1.3063897447909103e-20	10
gaba_neurons	Pid1	4.279311947101847e-25	1.2866867278849425	0.859	0.513	1.4419569536954385e-20	10
gaba_neurons	Tenm1	4.433306831200202e-25	1.0121558819829986	1	0.862	1.49384706984122e-20	10
gaba_neurons	Gm13963	1.6799908209842046e-24	1.101693794301926	0.543	0.169	5.660897070388376e-20	10
gaba_neurons	Adgra1	1.6859217477292897e-24	1.0931380667759305	0.641	0.246	5.680881921148615e-20	10
gaba_neurons	Ppm1h	1.8124846794244045e-24	1.0891239070966026	0.859	0.475	6.107348375788474e-20	10
gaba_neurons	Gm55122	1.954232380867144e-24	1.2865103658633064	0.837	0.468	6.584981430569928e-20	10
gaba_neurons	Msi2	2.882882912744848e-24	1.0054277849254103	0.87	0.475	9.71416226278504e-20	10
gaba_neurons	Pde4d	1.9119919759625715e-23	1.0091849338891112	1	0.936	6.442648162203481e-19	10
gaba_neurons	Tspan5	4.02594280856147e-23	1.1060932016316023	0.891	0.626	1.3565816887728729e-18	10
gaba_neurons	Myo16	5.514045667484801e-23	1.1996104580984963	0.783	0.406	1.8580128281156785e-18	10
gaba_neurons	Dab1	5.86826201575458e-22	1.0556902870381237	0.989	0.813	1.9773695688286633e-17	10
gaba_neurons	Cerk	8.370258454496839e-22	1.0353017895972436	0.511	0.17	2.820442288827255e-17	10
gaba_neurons	Tox3	1.429157377859882e-21	1.0532951613659365	0.641	0.25	4.8156887004366584e-17	10
gaba_neurons	Tmem108	2.556171628750826e-21	1.2048215138562506	0.761	0.368	8.613275920238783e-17	10
gaba_neurons	Slc4a4	3.673761439123696e-21	1.0091221711535212	0.717	0.3	1.2379106545271208e-16	10
gaba_neurons	Slc44a5	8.029475003783797e-21	1.0709229960402025	0.793	0.396	2.7056118972749883e-16	10
gaba_neurons	4930445B16Rik	1.146438404954579e-20	1.0755078831647569	0.707	0.299	3.8630388493349496e-16	10
gaba_neurons	Ints6l	2.2502373623860043e-20	1.1110397757441812	0.598	0.249	7.58239981629588e-16	10
gaba_neurons	Kcnip1	3.2891161883366314e-20	1.0728644482695435	0.826	0.437	1.1083005908219114e-15	10
gaba_neurons	Cit	4.678958834201098e-20	1.0139375524759742	0.891	0.626	1.576621968772402e-15	10
gaba_neurons	Oxr1	1.4445490173066442e-18	1.0326163149108063	0.957	0.708	4.8675523687164686e-14	10

## Sheet: Table_S6_neurotr._expr_summary
cell_type	cluster	Avpr1b_mean	Avpr1b_sd	Oxt_mean	Oxt_sd	Avp_mean	Avp_sd	Oxtr_mean	Oxtr_sd	Th_mean	Th_sd	Drd2_mean	Drd2_sd	Avpr1a_mean	Avpr1a_sd	Drd1_mean	Drd1_sd	Slc6a3_mean	Slc6a3_sd
gaba_neurons	0	0.001	0.03	0.089	0.313	0.259	0.526	0.017	0.14	0.009	0.112	0.035	0.198	0.001	0.03	0.025	0.17	0	0
gaba_neurons	1	0	0	0.071	0.3	0.243	0.524	0.02	0.144	0.003	0.055	0.005	0.069	0.003	0.065	0.142	0.403	0	0
gaba_neurons	2	0	0	0.095	0.342	0.234	0.49	0.031	0.178	0.004	0.073	0.033	0.189	0.003	0.06	0.026	0.176	0	0
gaba_neurons	3	0.001	0.03	0.073	0.283	0.19	0.431	0.018	0.135	0.002	0.033	0.523	0.72	0	0	0.13	0.355	0.001	0.038
gaba_neurons	4	0.002	0.04	0.078	0.295	0.201	0.436	0.027	0.169	0.005	0.08	0.076	0.279	0	0	0.038	0.2	0.003	0.054
gaba_neurons	5	0	0	0.072	0.282	0.213	0.468	0.034	0.181	0	0	0.02	0.163	0	0	0.037	0.211	0	0
gaba_neurons	6	0	0	0.075	0.292	0.186	0.434	0.015	0.13	0.002	0.04	0.091	0.309	0	0	0.016	0.153	0	0
gaba_neurons	7	0	0	0.094	0.319	0.204	0.462	0.011	0.102	0.002	0.042	0.018	0.129	0	0	0.021	0.146	0	0
gaba_neurons	8	0	0	0.07	0.316	0.197	0.47	0.005	0.078	0	0	0.016	0.157	0	0	0.017	0.135	0	0
gaba_neurons	9	0	0	0.074	0.299	0.206	0.479	0.026	0.211	0	0	0.012	0.119	0	0	0.019	0.133	0	0
gaba_neurons	10	0	0	0.042	0.205	0.211	0.479	0.024	0.159	0	0	0.011	0.103	0	0	0.008	0.079	0	0
glut_neurons	0	0	0	0.11	0.363	0.316	0.602	0.01	0.098	0.003	0.056	0.012	0.117	0	0	0.04	0.197	0	0.018
glut_neurons	1	0	0	0.057	0.232	0.175	0.392	0.01	0.09	0.003	0.06	0.003	0.049	0	0	0.026	0.151	0	0
glut_neurons	2	0.001	0.017	0.062	0.24	0.188	0.404	0.01	0.087	0.001	0.026	0.019	0.12	0.001	0.031	0.015	0.117	0	0
glut_neurons	3	0	0	0.06	0.238	0.172	0.403	0.023	0.143	0	0	0.008	0.09	0	0	0.043	0.199	0	0
glut_neurons	4	0.002	0.035	0.058	0.233	0.172	0.362	0.009	0.089	0.001	0.022	0.012	0.095	0.001	0.02	0.075	0.239	0	0
glut_neurons	5	0	0	0.059	0.239	0.138	0.365	0.035	0.175	0.001	0.032	0.013	0.12	0	0	0.013	0.117	0	0
glut_neurons	6	0.002	0.048	0.082	0.309	0.259	0.483	0.028	0.179	0	0	0.08	0.318	0	0	0.057	0.231	0.001	0.028
glut_neurons	7	0	0	0.065	0.256	0.194	0.424	0.033	0.168	0.001	0.026	0.001	0.029	0	0	0.012	0.112	0	0
glut_neurons	8	0	0	0.079	0.286	0.301	0.522	0.016	0.117	0	0	0.013	0.109	0	0	0.025	0.151	0	0
glut_neurons	9	0	0	0.079	0.285	0.188	0.424	0.028	0.173	0	0	0.021	0.145	0	0	0.095	0.283	0	0
glut_neurons	10	0	0	0.058	0.236	0.192	0.406	0.04	0.194	0	0	0.277	0.494	0	0	0.106	0.303	0	0
glut_neurons	11	0	0	0.084	0.399	0.378	0.792	0	0	0	0	0.017	0.176	0	0	0	0	0	0
glut_neurons	12	0	0	0.09	0.305	0.256	0.466	0.028	0.159	0	0	0	0	0.009	0.086	0.096	0.283	0	0
glut_neurons	13	0	0	0.099	0.305	0.103	0.322	0.016	0.126	0	0	0.022	0.122	0	0	0.014	0.11	0	0
glut_neurons	14	0	0	0.037	0.176	0.091	0.27	0.016	0.11	0	0	0.035	0.172	0	0	0.029	0.145	0	0

## Sheet: Table_S7_mmc_subclass_assign
seurat_clusters	cluster_num	MMC_subclass_name	ave_probability	cell_count	fraction.of.cells	fraction.of.cells.per.cluster
Glut 0	0	CoAa-PAA-MeA Barhl2	0.87164	55	0.00648	0.0364
Glut 0	0	DG	1	1	1.2e-4	6.6e-4
Glut 0	0	L2/3 IT CTX	0.77	1	1.2e-4	6.6e-4
Glut 0	0	LA-BLA-BMA-PA	0.775	2	2.4e-4	0.00132
Glut 0	0	MeA Otp Foxp2	0.98072	181	0.02132	0.11979
Glut 0	0	MeA Slc17a7	0.99967	151	0.01779	0.09993
Glut 0	0	MeA-BST Otp Zic2	0.87385	26	0.00306	0.01721
Glut 0	0	MeA-BST Sox6	0.82966	29	0.00342	0.01919
Glut 0	0	MeA-CoA-BMA Ccdc42	0.97767	1065	0.12546	0.70483
Glut 1	1	CA3	1	1	1.2e-4	9.5e-4
Glut 1	1	CoAa-PAA-MeA Barhl2	1	1	1.2e-4	9.5e-4
Glut 1	1	CoAp Grxcr2	0.87579	19	0.00224	0.01803
Glut 1	1	DG	1	4	4.7e-4	0.0038
Glut 1	1	IT EP-CLA	0.94	1	1.2e-4	9.5e-4
Glut 1	1	L2/3 IT CTX	0.91951	41	0.00483	0.0389
Glut 1	1	L2/3 IT ENT	0.90469	32	0.00377	0.03036
Glut 1	1	L2/3 IT PIR-ENTl	0.97855	891	0.10496	0.84535
Glut 1	1	L4/5 IT CTX	0.93667	9	0.00106	0.00854
Glut 1	1	L5/6 IT TPE-ENT	0.906	5	5.9e-4	0.00474
Glut 1	1	LA-BLA-BMA-PA	0.862	20	0.00236	0.01898
Glut 1	1	MeA Slc17a7	0.90767	30	0.00353	0.02846
Glut 2	2	CoAp Grxcr2	1	3	3.5e-4	0.00371
Glut 2	2	L2/3 IT CTX	0.68	2	2.4e-4	0.00248
Glut 2	2	L2/3 IT ENT	1	1	1.2e-4	0.00124
Glut 2	2	L2/3 IT PIR-ENTl	0.94487	39	0.00459	0.04827
Glut 2	2	L4/5 IT CTX	0.90222	27	0.00318	0.03342
Glut 2	2	L5/6 IT TPE-ENT	0.854	15	0.00177	0.01856
Glut 2	2	LA-BLA-BMA-PA	0.98658	672	0.07916	0.83168
Glut 2	2	MeA Slc17a7	0.91469	49	0.00577	0.06064
Glut 3	3	CoAp Grxcr2	0.92329	85	0.01001	0.10968
Glut 3	3	L2/3 IT PIR-ENTl	0.86636	22	0.00259	0.02839
Glut 3	3	LA-BLA-BMA-PA	0.99139	656	0.07728	0.84645
Glut 3	3	MeA Slc17a7	0.91083	12	0.00141	0.01548
Glut 4	4	L6 CT CTX	0.79	1	1.2e-4	0.00142
Glut 4	4	LA-BLA-BMA-PA	0.99745	698	0.08222	0.9943
Glut 4	4	MeA Slc17a7	0.79667	3	3.5e-4	0.00427
Glut 5	5	CA3	0.99856	97	0.01143	0.13877
Glut 5	5	DG	1	25	0.00294	0.03577
Glut 5	5	L2/3 IT PIR-ENTl	1	1	1.2e-4	0.00143
Glut 5	5	LA-BLA-BMA-PA	0.972	115	0.01355	0.16452
Glut 5	5	MeA Slc17a7	0.98806	459	0.05407	0.65665
Glut 5	5	MeA-BST Otp Zic2	0.58	1	1.2e-4	0.00143
Glut 5	5	NLOT Rho	0.49	1	1.2e-4	0.00143
Glut 6	6	CoAa-PAA-MeA Barhl2	0.9899	600	0.07068	0.91185
Glut 6	6	L2/3 IT PIR-ENTl	1	2	2.4e-4	0.00304
Glut 6	6	LA-BLA-BMA-PA	1	1	1.2e-4	0.00152
Glut 6	6	MeA Otp Foxp2	1	2	2.4e-4	0.00304
Glut 6	6	MeA Slc17a7	0.96273	11	0.0013	0.01672
Glut 6	6	MeA-BST Otp Zic2	0.62	1	1.2e-4	0.00152
Glut 6	6	MeA-BST Sox6	0.43	1	1.2e-4	0.00152
Glut 6	6	MeA-CoA-BMA Ccdc42	0.91625	40	0.00471	0.06079
Glut 7	7	CoAa-PAA-MeA Barhl2	1	1	1.2e-4	0.00207
Glut 7	7	CoAp Grxcr2	0.97306	108	0.01272	0.2236
Glut 7	7	DG	1	1	1.2e-4	0.00207
Glut 7	7	L2/3 IT PIR-ENTl	0.91483	29	0.00342	0.06004
Glut 7	7	LA-BLA-BMA-PA	0.905	6	7.1e-4	0.01242
Glut 7	7	MeA Slc17a7	0.98296	338	0.03982	0.69979
Glut 8	8	CoAa-PAA-MeA Barhl2	0.86469	32	0.00377	0.07637
Glut 8	8	CoAp Grxcr2	0.84	1	1.2e-4	0.00239
Glut 8	8	DG	1	1	1.2e-4	0.00239
Glut 8	8	IT EP-CLA	0.99644	59	0.00695	0.14081
Glut 8	8	L2/3 IT PIR-ENTl	0.98	1	1.2e-4	0.00239
Glut 8	8	L4/5 IT CTX	1	1	1.2e-4	0.00239
Glut 8	8	L6 CT CTX	1	1	1.2e-4	0.00239
Glut 8	8	LA-BLA-BMA-PA	0.94692	26	0.00306	0.06205
Glut 8	8	MeA Slc17a7	0.98996	230	0.02709	0.54893
Glut 8	8	MeA-BST Otp Zic2	0.64	3	3.5e-4	0.00716
Glut 8	8	MeA-BST Sox6	0.955	4	4.7e-4	0.00955
Glut 8	8	MeA-CoA-BMA Ccdc42	0.9585	60	0.00707	0.1432
Glut 9	9	IT EP-CLA	1	4	4.7e-4	0.01325
Glut 9	9	L6 CT CTX	0.98386	88	0.01037	0.29139
Glut 9	9	L6b EPd	0.98181	177	0.02085	0.58609
Glut 9	9	L6b/CT ENT	0.93485	33	0.00389	0.10927
Glut 10	10	IT EP-CLA	0.99707	249	0.02933	0.98419
Glut 10	10	L5/6 IT TPE-ENT	0.9925	4	4.7e-4	0.01581
Glut 11	11	CoAp Grxcr2	0.98	1	1.2e-4	0.01299
Glut 11	11	DG	1	3	3.5e-4	0.03896
Glut 11	11	IT EP-CLA	1	1	1.2e-4	0.01299
Glut 11	11	L2/3 IT CTX	1	2	2.4e-4	0.02597
Glut 11	11	L2/3 IT PIR-ENTl	0.88667	6	7.1e-4	0.07792
Glut 11	11	L4/5 IT CTX	0.91	2	2.4e-4	0.02597
Glut 11	11	L5/6 IT TPE-ENT	0.855	2	2.4e-4	0.02597
Glut 11	11	LA-BLA-BMA-PA	0.95982	56	0.0066	0.72727
Glut 11	11	MeA Slc17a7	0.68	2	2.4e-4	0.02597
Glut 11	11	NLOT Rho	1	2	2.4e-4	0.02597
Glut 12	12	LA-BLA-BMA-PA	0.6	1	1.2e-4	0.01087
Glut 12	12	MeA Slc17a7	0.885	4	4.7e-4	0.04348
Glut 12	12	NLOT Rho	0.99184	87	0.01025	0.94565
Glut 13	13	LA-BLA-BMA-PA	1	51	0.00601	0.98077
Glut 13	13	MeA Slc17a7	0.62	1	1.2e-4	0.01923
Glut 14	14	L2/3 IT PIR-ENTl	0.93	3	3.5e-4	0.08108
Glut 14	14	L4/5 IT CTX	0.90667	6	7.1e-4	0.16216
Glut 14	14	L5/6 IT TPE-ENT	0.91385	26	0.00306	0.7027
Glut 14	14	LA-BLA-BMA-PA	1	2	2.4e-4	0.05405
Glut 0	0	CEA-AAA-BST Six3 Sp9	0.98306	180	0.02607	0.15845
Glut 0	0	CEA-BST Ebf1 Pdyn	0.97844	32	0.00463	0.02817
Glut 0	0	CEA-BST Six3 Cyp26b1	0.97214	14	0.00203	0.01232
Glut 0	0	IA Mgp	0.9832	25	0.00362	0.02201
Glut 0	0	MeA-BST Lhx6 Nfib	0.95333	6	8.7e-4	0.00528
Glut 0	0	MeA-BST Lhx6 Nr2e1	0.9915	120	0.01738	0.10563
Glut 0	0	MeA-BST Lhx6 Sp9	0.99745	345	0.04997	0.3037
Glut 0	0	MeA-BST Sox6	0.98877	397	0.0575	0.34947
Glut 0	0	STR Prox1 Lhx6	1	1	1.4e-4	8.8e-4
Glut 0	0	STR-PAL Chst9	0.98667	9	0.0013	0.00792
Glut 0	0	Sst	1	5	7.2e-4	0.0044
Glut 0	0	Sst Chodl	0.77	2	2.9e-4	0.00176
Glut 1	1	CEA-AAA-BST Six3 Sp9	0.98053	19	0.00275	0.01843
Glut 1	1	IA Mgp	0.99813	32	0.00463	0.03104
Glut 1	1	MeA-BST Lhx6 Nr2e1	1	2	2.9e-4	0.00194
Glut 1	1	MeA-BST Lhx6 Sp9	1	1	1.4e-4	9.7e-4
Glut 1	1	MeA-BST Sox6	0.92	2	2.9e-4	0.00194
Glut 1	1	STR-PAL Chst9	0.99571	975	0.14122	0.94568
Glut 2	2	CEA-AAA-BST Six3 Sp9	1	1	1.4e-4	0.00141
Glut 2	2	IA Mgp	1	1	1.4e-4	0.00141
Glut 2	2	MeA-BST Lhx6 Nfib	1	5	7.2e-4	0.00707
Glut 2	2	MeA-BST Lhx6 Nr2e1	1	2	2.9e-4	0.00283
Glut 2	2	MeA-BST Sox6	1	4	5.8e-4	0.00566
Glut 2	2	Pvalb	0.97434	256	0.03708	0.36209
Glut 2	2	Pvalb chandelier	0.96	2	2.9e-4	0.00283
Glut 2	2	RHP-CoA Ndnf	0.94333	6	8.7e-4	0.00849
Glut 2	2	STR Prox1 Lhx6	0.98711	190	0.02752	0.26874
Glut 2	2	STR-PAL Chst9	1	1	1.4e-4	0.00141
Glut 2	2	Sst	0.96652	230	0.03331	0.32532
Glut 2	2	Sst Chodl	0.98111	9	0.0013	0.01273
Glut 3	3	CEA-AAA-BST Six3 Sp9	0.95462	13	0.00188	0.01937
Glut 3	3	CEA-BST Ebf1 Pdyn	0.936	5	7.2e-4	0.00745
Glut 3	3	CEA-BST Six3 Cyp26b1	0.98789	114	0.01651	0.1699
Glut 3	3	MeA-BST Lhx6 Nr2e1	0.9	1	1.4e-4	0.00149
Glut 3	3	MeA-BST Lhx6 Sp9	1	1	1.4e-4	0.00149
Glut 3	3	RHP-CoA Ndnf	1	1	1.4e-4	0.00149
Glut 3	3	STR D1	0.9858	176	0.02549	0.2623
Glut 3	3	STR D2	0.99579	356	0.05156	0.53055
Glut 3	3	STR-PAL Chst9	0.755	4	5.8e-4	0.00596
Glut 4	4	CEA-AAA-BST Six3 Sp9	0.9839	154	0.02231	0.2597
Glut 4	4	CEA-BST Ebf1 Pdyn	0.99234	321	0.04649	0.54132
Glut 4	4	CEA-BST Six3 Cyp26b1	0.98943	88	0.01275	0.1484
Glut 4	4	IA Mgp	1	2	2.9e-4	0.00337
Glut 4	4	MeA-BST Lhx6 Sp9	0.93333	6	8.7e-4	0.01012
Glut 4	4	MeA-BST Sox6	0.75	4	5.8e-4	0.00675
Glut 4	4	STR D1	0.95	6	8.7e-4	0.01012
Glut 4	4	STR D2	1	2	2.9e-4	0.00337
Glut 4	4	STR-PAL Chst9	1	9	0.0013	0.01518
Glut 4	4	Sst	1	1	1.4e-4	0.00169
Glut 5	5	MeA-BST Lhx6 Nfib	0.99214	103	0.01492	0.19181
Glut 5	5	MeA-BST Lhx6 Nr2e1	0.99241	54	0.00782	0.10056
Glut 5	5	MeA-BST Lhx6 Sp9	0.64	1	1.4e-4	0.00186
Glut 5	5	STR Prox1 Lhx6	0.93	6	8.7e-4	0.01117
Glut 5	5	Sst	0.99994	319	0.04621	0.59404
Glut 5	5	Sst Chodl	1	54	0.00782	0.10056
Glut 6	6	CEA-AAA-BST Six3 Sp9	0.95105	19	0.00275	0.03934
Glut 6	6	CEA-BST Ebf1 Pdyn	0.99532	77	0.01115	0.15942
Glut 6	6	CEA-BST Six3 Cyp26b1	0.99625	360	0.05214	0.74534
Glut 6	6	IA Mgp	0.99	1	1.4e-4	0.00207
Glut 6	6	STR D2	0.976	25	0.00362	0.05176
Glut 6	6	STR-PAL Chst9	1	1	1.4e-4	0.00207
Glut 7	7	Lamp5	1	7	0.00101	0.01632
Glut 7	7	MeA-BST Lhx6 Nfib	0.99794	214	0.031	0.49883
Glut 7	7	MeA-BST Lhx6 Nr2e1	0.99387	31	0.00449	0.07226
Glut 7	7	MeA-BST Lhx6 Sp9	1	22	0.00319	0.05128
Glut 7	7	MeA-BST Sox6	1	85	0.01231	0.19814
Glut 7	7	RHP-CoA Ndnf	0.98322	59	0.00855	0.13753
Glut 7	7	STR Prox1 Lhx6	1	4	5.8e-4	0.00932
Glut 7	7	Sncg	0.86	2	2.9e-4	0.00466
Glut 7	7	Sst	1	2	2.9e-4	0.00466
Glut 7	7	Sst Chodl	1	1	1.4e-4	0.00233
Glut 7	7	Vip	0.94	2	2.9e-4	0.00466
Glut 8	8	Lamp5	0.85857000000000006	7	0.00101	0.01741
Glut 8	8	MeA-BST Lhx6 Sp9	0.6	1	1.4e-4	0.00249
Glut 8	8	MeA-BST Sox6	1	1	1.4e-4	0.00249
Glut 8	8	RHP-CoA Ndnf	0.93158	19	0.00275	0.04726
Glut 8	8	Sncg	0.9823	152	0.02202	0.37811
Glut 8	8	Sst	1	1	1.4e-4	0.00249
Glut 8	8	Vip	0.98534	221	0.03201	0.54975
Glut 9	9	Lamp5	0.99916	131	0.01897	0.9562
Glut 9	9	RHP-CoA Ndnf	0.92	1	1.4e-4	0.0073
Glut 9	9	Sncg	0.81	3	4.3e-4	0.0219
Glut 9	9	Vip	0.675	2	2.9e-4	0.0146
Glut 10	10	Pvalb chandelier	0.99839	87	0.0126	1

## Sheet: Table_S8_glmm_results
Subcluster	IEG	Comparison	Estimate	Std. Error	z value	Pr(>|z|)	confint_2.5	confint_97.5
Glut 8	Homer1	Sub - Dom	-0.583	0.202	-2.893	0.004	-0.98	-0.19
Glut 3	Homer1	Sub - Dom	0.223	0.149	1.493	0.135	-0.07	0.515
Glut 0	Homer1	Sub - Dom	0.238	0.105	2.261	0.024	0.031	0.444
Glut 4	Homer1	Sub - Dom	-0.214	0.162	-1.323	0.186	-0.53	0.103
Glut 7	Homer1	Sub - Dom	-0.097	0.183	-0.528	0.597	-0.457	0.262
Glut 1	Homer1	Sub - Dom	0.139	0.127	1.093	0.275	-0.11	0.388
Glut 2	Homer1	Sub - Dom	-0.002	0.158	-0.015	0.988	-0.312	0.307
Glut 13	Homer1	Sub - Dom	-0.727	0.723	-1.005	0.315	-2.317	0.606
Glut 11	Homer1	Sub - Dom	0.578	0.461	1.254	0.21	-0.333	1.488
Glut 5	Homer1	Sub - Dom	0.22	0.16	1.381	0.167	-0.092	0.534
Glut 9	Homer1	Sub - Dom	-0.41	0.225	-1.823	0.068	-0.854	0.028
Glut 12	Homer1	Sub - Dom	0.619	0.617	1.004	0.315	-0.519	1.955
Glut 6	Homer1	Sub - Dom	0.078	0.169	0.463	0.643	-0.252	0.412
Glut 10	Homer1	Sub - Dom	-0.144	0.259	-0.556	0.578	-0.655	0.362
Glut 14	Homer1	Sub - Dom	-0.329	0.758	-0.433	0.665	-1.969	1.09
GABA 7	Homer1	Sub - Dom	0.236	0.192	1.228	0.219	-0.14	0.612
GABA 0	Homer1	Sub - Dom	-0.041	0.109	-0.382	0.703	-0.255	0.171
GABA 9	Homer1	Sub - Dom	0.346	0.322	1.072	0.284	-0.284	0.984
GABA 5	Homer1	Sub - Dom	0.102	0.178	0.577	0.564	-0.246	0.451
GABA 2	Homer1	Sub - Dom	-0.015	0.15	-0.097	0.922	-0.309	0.28
GABA 1	Homer1	Sub - Dom	-0.16	0.129	-1.245	0.213	-0.413	0.092
GABA 4	Homer1	Sub - Dom	0.167	0.155	1.082	0.279	-0.135	0.471
GABA 3	Homer1	Sub - Dom	-0.341	0.153	-2.224	0.026	-0.642	-0.041
GABA 10	Homer1	Sub - Dom	0.029	0.435	0.066	0.947	-0.823	0.889
GABA 8	Homer1	Sub - Dom	-0.066	0.207	-0.32	0.749	-0.472	0.34
GABA 6	Homer1	Sub - Dom	-0.211	0.182	-1.159	0.247	-0.57	0.146

## Sheet: Table_S9_DEGs_Homer1pos_vs_neg
p_val	avg_log2FC	pct.1	pct.2	p_val_adj	cluster	gene	subcluster	cell_type
5.69834402729121e-39	-0.276935	0.921	0.948	1.920114003436046e-34	inactive	Ly6h	NA	glut_neurons
8.693328463154651e-37	-0.347657	0.89	0.916	2.929303958944591e-32	inactive	Fth1	NA	glut_neurons
1.4374007927894062e-35	-0.372127	0.773	0.789	4.843465711383183e-31	inactive	Chchd2	NA	glut_neurons
1.5015126478223566e-35	-0.317882	0.863	0.893	5.059497018102213e-31	inactive	Atp6v0c	NA	glut_neurons
1.5158963888952053e-35	-0.31247	0.877	0.901	5.107964472021284e-31	inactive	Cox4i1	NA	glut_neurons
1.22401055812128e-34	-0.327	0.859	0.882	4.1244259766454656e-30	inactive	Apoe	NA	glut_neurons
1.4126320062078698e-34	-0.312026	0.86	0.891	4.760004808118038e-30	inactive	Tmsb4x	NA	glut_neurons
2.505384024738545e-34	-0.308667	0.812	0.833	8.442142009759e-30	inactive	Ubb	NA	glut_neurons
2.975156413405702e-29	-0.302936	0.714	0.637	1.0025087050611855e-24	inactive	Cdh13	NA	glut_neurons
6.326231727845153e-28	-0.302323	0.822	0.855	2.1316870430147027e-23	inactive	Cox8a	NA	glut_neurons
5.655247011565193e-27	-0.314081	0.867	0.898	1.9055920330170074e-22	inactive	Cst3	NA	glut_neurons
1.3887456532020092e-25	-0.326985	0.786	0.797	4.67951735302949e-21	inactive	Usp29	NA	glut_neurons
2.1078260050571035e-25	-0.32087	0.77	0.803	7.102530506640417e-21	inactive	Rpl13	NA	glut_neurons
3.259285359396501e-25	-0.278115	0.802	0.836	1.098248794702245e-20	inactive	Stmn3	NA	glut_neurons
4.1887787270088896e-24	-0.580704	0.437	0.366	1.4114508798529154e-19	inactive	Zfp804b	NA	glut_neurons
3.8038926562214115e-23	-0.339021	0.745	0.782	1.2817596694403669e-18	inactive	Ndufa4	NA	glut_neurons
2.5354528280311646e-22	-0.285782	0.825	0.875	8.543461849333813e-18	inactive	Hspa8	NA	glut_neurons
3.356832522651685e-22	-0.309054	0.714	0.739	1.1311182868327118e-17	inactive	Rpl41	NA	glut_neurons
1.0830346481581222e-21	-0.267917	0.776	0.807	3.6493935504336085e-17	inactive	Pcsk1n	NA	glut_neurons
1.1539714630217724e-21	-0.292216	0.789	0.825	3.8884222417981645e-17	inactive	Rplp1	NA	glut_neurons
1.7875169105561372e-21	-0.314902	0.695	0.716	6.02321698180996e-17	inactive	Rpl19	NA	glut_neurons
4.6517741913111735e-21	-0.293535	0.71	0.74	1.567461831504213e-16	inactive	Atpif1	NA	glut_neurons
1.326553816483199e-20	-0.258661	0.83	0.871	4.469955740021788e-16	inactive	Ppia	NA	glut_neurons
2.409615702564743e-20	-0.304101	0.791	0.819	8.119441071362158e-16	inactive	P2ry14	NA	glut_neurons
3.887987258478572e-20	-0.325476	0.254	0.186	1.3100961866169395e-15	inactive	Baiap3	NA	glut_neurons
5.382334793772467e-20	-0.447989	0.502	0.436	1.8136315321095706e-15	inactive	4930555F03Rik	NA	glut_neurons
1.0092624220851883e-19	-0.270263	0.75	0.791	3.4008106574582503e-15	inactive	Aldoa	NA	glut_neurons
2.0766229150131827e-19	-0.260967	0.829	0.866	6.997388574428421e-15	inactive	Gnas	NA	glut_neurons
4.238049719879905e-18	-0.570659	0.382	0.323	1.4280532336107326e-13	inactive	Adarb2	NA	glut_neurons
4.536039068662515e-18	-0.303237	0.691	0.731	1.5284637245765208e-13	inactive	Rps29	NA	glut_neurons
5.8411440210240666e-18	-0.283971	0.742	0.787	1.9682318893242695e-13	inactive	Rps8	NA	glut_neurons
2.4431774242952253e-16	-0.301009	0.654	0.685	8.232530648905192e-12	inactive	Mt3	NA	glut_neurons
1.0855948732424988e-15	-0.250917	0.693	0.723	3.658020484877924e-11	inactive	Hap1	NA	glut_neurons
2.0268232744559504e-14	-0.344907	0.477	0.43	6.82958370560677e-10	inactive	C130073E24Rik	NA	glut_neurons
4.3715089450365054e-14	-0.407604	0.428	0.378	1.473023654119501e-9	inactive	Gm45321	NA	glut_neurons
5.0332565517024566e-14	-0.449965	0.259	0.209	1.6960061276616598e-9	inactive	B230217J21Rik	NA	glut_neurons
6.300406790754999e-14	-0.265391	0.682	0.725	2.1229850722128046e-9	inactive	Cox7c	NA	glut_neurons
7.827517713115976e-14	-0.25891	0.7	0.753	2.6375603686115595e-9	inactive	Tuba1a	NA	glut_neurons
1.3451956257560712e-13	-0.271625	0.647	0.675	4.532771180547657e-9	inactive	Rpl37	NA	glut_neurons
1.4574875964116079e-13	-0.255964	0.718	0.772	4.9111502048685535e-9	inactive	Cox6c	NA	glut_neurons
2.499494932471091e-13	-0.258584	0.615	0.647	8.422298124454587e-9	inactive	Rpl3	NA	glut_neurons
4.722551098528595e-13	-0.275479	0.264	0.21	1.5913108181601954e-8	inactive	Sema5a	NA	glut_neurons
5.726209111343817e-13	-0.266857	0.704	0.754	1.9295034221584126e-8	inactive	Fau	NA	glut_neurons
7.404927871617923e-13	-0.26417	0.664	0.695	2.495164495620375e-8	inactive	Rps21	NA	glut_neurons
1.006445641382913e-12	-0.362078	0.305	0.263	3.391319233203863e-8	inactive	Zbtb7c	NA	glut_neurons
1.149779329143148e-12	-0.255467	0.692	0.734	3.874296427480751e-8	inactive	Dynll1	NA	glut_neurons
1.3419749256881943e-12	-0.311397	0.511	0.462	4.521918709598939e-8	inactive	Rmst	NA	glut_neurons
2.511204879458722e-12	-0.278564	0.644	0.676	8.46175596182411e-8	inactive	Rps24	NA	glut_neurons
2.598323173188508e-12	-0.260776	0.628	0.656	8.755309764375997e-8	inactive	Cox7a2	NA	glut_neurons
3.605606311854327e-12	-0.316891	0.232	0.184	1.2149451028424339e-7	inactive	Arhgap24	NA	glut_neurons
3.86901873676728e-12	-0.302051	0.393	0.351	1.3037045535411025e-7	inactive	9530026P05Rik	NA	glut_neurons
2.4851784194389133e-11	-0.267072	0.192	0.145	8.374057202141362e-7	inactive	Kcnip1	NA	glut_neurons
2.6194672735865357e-11	-0.260101	0.642	0.689	8.826556925077191e-7	inactive	Cox5a	NA	glut_neurons
2.82247202970882e-11	-0.261583	0.67	0.727	9.51060175130684e-7	inactive	Eif1	NA	glut_neurons
4.185509026058465e-11	-0.265511	0.631	0.674	1.4103491214206603e-6	inactive	Rpl38	NA	glut_neurons
4.894905259507907e-11	-0.307126	0.4	0.356	1.6493872762437844e-6	inactive	Gm2516	NA	glut_neurons
5.041565763506111e-11	-0.275333	0.596	0.628	1.698805999671019e-6	inactive	Ndufb9	NA	glut_neurons
7.442199492592884e-11	-0.251568	0.395	0.348	2.5077235410240984e-6	inactive	Unc13c	NA	glut_neurons
1.1410896510886996e-10	-0.26461	0.603	0.632	3.845015688308482e-6	inactive	Rpl11	NA	glut_neurons
3.69764452345274e-10	-0.278217	0.635	0.684	1.2459582986226353e-5	inactive	Rps27a	NA	glut_neurons
5.147984930579538e-10	-0.260179	0.557	0.58	1.734665002208081e-5	inactive	Rpl35a	NA	glut_neurons
8.396981385548521e-10	-0.274746	0.28	0.247	2.8294468476744296e-5	inactive	Pifo	NA	glut_neurons
1.529207369166396e-9	-0.259517	0.538	0.561	5.152817151143088e-5	inactive	Ndufa13	NA	glut_neurons
2.3228345798308363e-9	-0.251864	0.544	0.559	7.827023400197986e-5	inactive	Cracd	NA	glut_neurons
2.3739306281195687e-9	-0.342618	0.357	0.32	7.999196644511698e-5	inactive	Grik1	NA	glut_neurons
3.417125671534924e-9	-0.250872	0.632	0.68	1.1514346662804079e-4	inactive	Rpl23	NA	glut_neurons
4.28734068012003e-9	-0.259674	0.55	0.582	1.4446623155732453e-4	inactive	6330403K07Rik	NA	glut_neurons
1.366498841273888e-7	-0.312444	0.5	0.501	0.00460455	inactive	Rbms3	NA	glut_neurons
2.2376039095054109e-7	-0.267415	0.461	0.477	0.00753983	inactive	Uqcrb	NA	glut_neurons
2.429143638190824e-7	-0.257336	0.202	0.166	0.00818524	inactive	Kctd8	NA	glut_neurons
3.435132138018968e-7	-0.38146	0.321	0.301	0.011575021252268714	inactive	Gm28905	NA	glut_neurons
3.514930631441025e-7	-0.266811	0.302	0.279	0.011843910255703678	inactive	Gm13629	NA	glut_neurons
0	2.209988774575597	1	0	0	active	Homer1	NA	glut_neurons
1.269723247421918e-142	0.45420544112474026	0.989	0.956	4.278459454512895e-138	active	Phactr1	NA	glut_neurons
5.599436240184444e-117	0.343545	0.999	0.99	1.8867860354925503e-112	active	Celf2	NA	glut_neurons
1.6382785824946081e-102	0.627105	0.905	0.764	5.5203435115738314e-98	active	Pde10a	NA	glut_neurons
1.2659534467241653e-91	0.38272699172961255	0.963	0.888	4.265756734081748e-87	active	Grin2a	NA	glut_neurons
8.004091275973155e-90	0.31383340460249265	0.993	0.967	2.6970585963519144e-85	active	Dlgap1	NA	glut_neurons
5.447415755519643e-85	0.3614934170273706	0.454	0.229	1.835561212979899e-80	active	Ankrd33b	NA	glut_neurons
9.977176510090752e-81	0.4189866010354377	0.948	0.864	3.36190939684018e-76	active	Oxr1	NA	glut_neurons
6.038812643126979e-80	0.3092518219596614	0.986	0.95	2.0348383082280668e-75	active	Nav3	NA	glut_neurons
2.677499985712538e-76	0.3539079109825538	0.964	0.882	9.022103951856969e-72	active	Dclk1	NA	glut_neurons
7.376911334978758e-75	0.35438	0.591	0.361	2.4857240434344423e-70	active	Spred2	NA	glut_neurons
1.9398236010807383e-70	0.34423779587141334	0.614	0.387	6.536429606201656e-66	active	Cacng3	NA	glut_neurons
2.5639444093828632e-70	0.25274593131214607	0.991	0.963	8.639467081856496e-66	active	Arpp21	NA	glut_neurons
4.921614010836286e-68	0.4613348823260568	0.589	0.393	1.658387057091395e-63	active	Gm49678	NA	glut_neurons
4.018819278734418e-67	0.33398663882761337	0.874	0.724	1.3541813441623493e-62	active	Atrnl1	NA	glut_neurons
4.8811993433967995e-67	0.2942903806028987	0.977	0.921	1.6447689307509857e-62	active	Dlgap2	NA	glut_neurons
1.915834953609168e-65	0.2927193847732621	0.934	0.839	6.455597459681453e-61	active	Otud7a	NA	glut_neurons
8.665809173246214e-65	0.557996	0.415	0.238	2.920031059017044e-60	active	Pdzrn3	NA	glut_neurons
3.212679731005164e-62	0.3508714687684227	0.603	0.397	1.0825445621595001e-57	active	Rasgef1b	NA	glut_neurons
3.847980518699394e-62	0.3418166063201382	0.869	0.701	1.2966155155809478e-57	active	Trim9	NA	glut_neurons
1.6191097328912963e-59	0.30197364500798285	0.932	0.831	5.455752155950512e-55	active	Hivep2	NA	glut_neurons
1.2580677250528468e-57	0.5403658740332893	0.792	0.691	4.239185006338072e-53	active	Tafa1	NA	glut_neurons
1.829384120884571e-57	0.3365302744020171	0.698	0.499	6.16429273373265e-53	active	Zeb2	NA	glut_neurons
2.620572172962424e-57	0.3268532951069538	0.765	0.561	8.830279994014183e-53	active	Nlk	NA	glut_neurons
1.6230331747053575e-56	0.3979099128231445	0.964	0.891	5.468972585487173e-52	active	R3hdm1	NA	glut_neurons
1.9725597184311333e-55	0.5201495532659712	0.892	0.767	6.646737227225547e-51	active	Ntrk2	NA	glut_neurons
9.838401752160692e-55	0.28397880866182856	0.276	0.13	3.315147854408067e-50	active	Lrrk2	NA	glut_neurons
9.622890688950364e-53	0.32046997760727525	0.97	0.952	3.242529246548715e-48	active	Lrrtm4	NA	glut_neurons
1.1081857106622613e-52	0.3177591303385672	0.556	0.368	3.734142570647556e-48	active	Epha7	NA	glut_neurons
6.925013733122239e-52	0.32314810825581963	0.915	0.801	2.3334526275128696e-47	active	Kcnq5	NA	glut_neurons
1.0564489107572723e-51	0.26192181812126053	0.213	0.088	3.5598102496877047e-47	active	Gm33934	NA	glut_neurons
3.963784820176864e-51	0.28026132722185215	0.864	0.705	1.335636933006796e-46	active	9530059O14Rik	NA	glut_neurons
1.0721134438358591e-50	0.2836110839502215	0.921	0.808	3.612593460349311e-46	active	ENSMUSG00000121513	NA	glut_neurons
5.363600007411835e-50	0.28525037841496026	0.875	0.729	1.8073186584974922e-45	active	Cnksr2	NA	glut_neurons
1.1078727047459968e-49	0.33530507096217255	0.762	0.603	3.733087865912111e-45	active	St6galnac5	NA	glut_neurons
2.054412217730565e-49	0.31841334931684573	0.848	0.728	6.922547408864912e-45	active	Tcf4	NA	glut_neurons
9.584334431150789e-49	0.26008871029967207	0.936	0.846	3.22953732992057e-44	active	Dmd	NA	glut_neurons
3.633587270564875e-48	0.29181498152708096	0.664	0.471	1.2243735666895404e-43	active	Xylt1	NA	glut_neurons
1.6686338169722565e-47	0.27421715853690576	0.744	0.566	5.622628509669715e-43	active	Msra	NA	glut_neurons
1.7025774345112236e-47	0.31213098651265425	0.592	0.409	5.737004923329019e-43	active	Adcy2	NA	glut_neurons
3.021462082073507e-47	0.28938723617467055	0.8	0.639	1.018111863175489e-42	active	Sv2b	NA	glut_neurons
4.990777484013762e-47	0.3246599387903397	0.808	0.639	1.681692381013277e-42	active	Ext1	NA	glut_neurons
6.49838408021569e-47	0.30172456886312427	0.835	0.7	2.1896954996694787e-42	active	Thrb	NA	glut_neurons
9.319476181956206e-47	0.33304299050084607	0.902	0.811	3.140290694271963e-42	active	Epha6	NA	glut_neurons
9.919441879370367e-47	0.27212783663777085	0.771	0.585	3.342455135672639e-42	active	Mical2	NA	glut_neurons
2.9389324651631455e-46	0.4718020237017173	0.732	0.581	9.903026834613735e-42	active	Etl4	NA	glut_neurons
3.2961721189046946e-46	0.36125009032955635	0.674	0.483	1.1106781571861259e-41	active	Ppm1l	NA	glut_neurons
6.786815718161088e-46	0.33937245034048935	0.787	0.618	2.2868854243915604e-41	active	Prkca	NA	glut_neurons
1.3776730710382914e-45	0.2927854608140148	0.734	0.561	4.642207180170626e-41	active	Rapgef5	NA	glut_neurons
1.8953835766138107e-45	0.3874643790601997	0.719	0.567	6.386684499757896e-41	active	Rgs6	NA	glut_neurons
2.3460838912956747e-45	0.2526272260117721	0.541	0.352	7.905364280109906e-41	active	Zswim6	NA	glut_neurons
3.6944368830122574e-45	0.34704648486491707	0.598	0.433	1.2448774520998103e-40	active	Htr1f	NA	glut_neurons
9.964878623514384e-45	0.35995633373187985	0.634	0.471	3.357765500979407e-40	active	Nfib	NA	glut_neurons
2.8984935355472694e-44	0.2721002159131556	0.621	0.438	9.766763817380079e-40	active	Asap1	NA	glut_neurons
1.3432812088116298e-43	0.2539213869599126	0.55	0.368	4.5263203612116676e-39	active	Cdh11	NA	glut_neurons
1.4612502593312726e-43	0.2558527798438055	0.96	0.895	4.923828873842656e-39	active	Sorbs2	NA	glut_neurons
3.63458115580156e-43	0.3220643342991236	0.228	0.11	1.2247084662588936e-38	active	1700016P03Rik	NA	glut_neurons
5.81498503125816e-43	0.3535619844137824	0.403	0.245	1.9594173561327498e-38	active	Mlip	NA	glut_neurons
1.1841735256178106e-42	0.3104999311024872	0.78	0.635	3.9901911119217746e-38	active	Tspan5	NA	glut_neurons
4.950624332153742e-42	0.2640595655501903	0.785	0.619	1.668162374962525e-37	active	Nos1ap	NA	glut_neurons
8.28210853871714e-42	0.2573545979102019	0.602	0.421	2.7907392932061275e-37	active	Kcnt2	NA	glut_neurons
2.3134520767062143e-40	0.30550547717503473	0.851	0.707	7.795408117669259e-36	active	Brinp1	NA	glut_neurons
3.749879298890096e-40	0.2948744034389488	0.594	0.424	1.2635593285540068e-35	active	Zfp385b	NA	glut_neurons
1.0830706710928902e-39	0.2935176730894675	0.587	0.417	3.649514933314603e-35	active	Plcl1	NA	glut_neurons
1.1713451528981244e-39	0.38429497644524635	0.652	0.496	3.94696462720552e-35	active	Slc2a13	NA	glut_neurons
1.428702947136214e-39	0.2748783697528794	0.407	0.253	4.814157450670187e-35	active	Mapk4	NA	glut_neurons
1.1226198239648641e-38	0.35961228723511884	0.632	0.482	3.782779758832006e-34	active	Cdh8	NA	glut_neurons
5.097692834534901e-38	0.3037280550723942	0.825	0.706	1.7177185775248803e-33	active	Prkcb	NA	glut_neurons
2.876042196290237e-37	0.2992409333391677	0.786	0.618	9.691111784619582e-33	active	Rgs7bp	NA	glut_neurons
6.5484131891966145e-37	0.2572661030243737	0.737	0.563	2.2065533082316912e-32	active	Cap2	NA	glut_neurons
3.3296535657323494e-36	0.3171637441638331	0.567	0.413	1.1219600655091725e-31	active	Sox5	NA	glut_neurons
1.1477646906428946e-35	0.28825680672189097	0.203	0.1	3.8675079015902975e-31	active	Pcsk1	NA	glut_neurons
3.8556741942389034e-35	0.2620505154463375	0.599	0.438	1.299207976490741e-30	active	Ndst3	NA	glut_neurons
4.203109160533077e-35	0.3474581010522604	0.663	0.506	1.4162796627332256e-30	active	Chsy3	NA	glut_neurons
8.677551316326474e-33	0.2615561269839304	0.719	0.564	2.923987691549369e-28	active	Cdh10	NA	glut_neurons
1.9367416703706235e-31	0.3706286459191759	0.935	0.88	6.526044732480853e-27	active	Dpp10	NA	glut_neurons
2.6238601406469834e-29	0.2519176151651026	0.817	0.691	8.841359129924074e-25	active	Plxna4	NA	glut_neurons
6.297098382613493e-29	0.2687592157490175	0.295	0.18	2.1218702710054425e-24	active	Gm47423	NA	glut_neurons
2.9440274236720824e-27	0.580258	0.234	0.14	9.920194806805449e-23	active	Gm34544	NA	glut_neurons
5.150661037458797e-27	0.2758197351635583	0.841	0.704	1.7355667431821164e-22	active	Ralgapa1	NA	glut_neurons
7.889778332999127e-27	0.2597580607950616	0.911	0.837	2.658539707087386e-22	active	Pde4d	NA	glut_neurons
2.2006234718055192e-26	0.2882917467109396	0.525	0.376	7.415220850595878e-22	active	Sik2	NA	glut_neurons
7.519667554479375e-26	0.2542253303811768	0.706	0.57	2.53382717915737e-21	active	Cpne4	NA	glut_neurons
1.0952877377966631e-24	0.2839166589194151	0.552	0.421	3.690681561279636e-20	active	Garnl3	NA	glut_neurons
4.826766193856808e-24	0.3231546592422361	0.599	0.49	1.62642713668199e-19	active	Grm8	NA	glut_neurons
1.3012060802787718e-22	0.27446296161480244	0.428	0.317	4.384544008107349e-18	active	Meis2	NA	glut_neurons
2.2817355887867013e-22	0.3453149869198575	0.529	0.416	7.688536239975669e-18	active	Il1rapl2	NA	glut_neurons
3.8166008770609134e-21	0.2530356316713398	0.939	0.869	1.2860418315344454e-16	active	Schip1	NA	glut_neurons
1.9078553184595746e-12	0.35384953082735704	0.611	0.495	6.428709281081382e-8	active	Elmo1	NA	glut_neurons
9.37391662686512e-82	2.118912250975658	1	0	3.1586349465884707e-77	active	Homer1	8	glut_neurons
1.1953051365321603e-6	0.3629993670006253	0.933	0.844	0.040277	active	Lncpint	8	glut_neurons
1.3452018455158795e-8	-0.31894	0.968	0.981	4.532792138650308e-4	inactive	Rnf121	3	glut_neurons
3.9987053607951163e-146	1.8642116283189776	1	0	1.3474037583735224e-141	active	Homer1	3	glut_neurons
2.8316259163149474e-10	0.3010033008252041	0.462	0.223	9.541446687614847e-6	active	Maml3	3	glut_neurons
7.370180917150292e-10	0.2749926124228468	1	1	2.4834561618429625e-5	active	Lsamp	3	glut_neurons
9.594996377171146e-10	0.46706278789005395	0.988	0.955	3.233129979251589e-5	active	Tafa1	3	glut_neurons
2.2952746473124326e-9	0.28179686077218546	0.993	0.955	7.734157451583973e-5	active	Nav3	3	glut_neurons
3.288810819454193e-9	0.2698765582499649	0.986	0.952	1.1081976937232848e-4	active	Dlgap2	3	glut_neurons
1.493704161395641e-8	0.3321894463344838	0.575	0.34	5.033185542238752e-4	active	Lin7a	3	glut_neurons
2.3193653800311385e-8	0.4944323047998307	0.553	0.359	7.815333584552924e-4	active	Inpp4b	3	glut_neurons
4.0077509741501095e-8	0.31821754338122554	0.99	0.949	0.00135045	active	Epha6	3	glut_neurons
4.344842303482188e-8	0.5622849070312648	0.781	0.601	0.00146404	active	Unc5d	3	glut_neurons
4.457560284162971e-8	0.3592434973083791	0.954	0.886	0.00150202	active	Lingo2	3	glut_neurons
1.0578383615439415e-7	0.3450653617100117	0.945	0.862	0.00356449	active	Cacnb2	3	glut_neurons
1.2386975318581498e-7	0.38164263146411903	0.957	0.87	0.00417392	active	Cntnap5a	3	glut_neurons
1.2968396938441903e-7	0.26509850125419976	0.416	0.218	0.00436983	active	Kcnh1	3	glut_neurons
1.3812739473335208e-7	0.3247217612256499	0.918	0.785	0.00465434	active	ENSMUSG00000121513	3	glut_neurons
1.5506958824430793e-7	0.31014346244953916	0.998	0.981	0.00522522	active	Lrrtm4	3	glut_neurons
1.9005152663196452e-7	0.3127367286873186	0.966	0.952	0.00640398	active	Dab1	3	glut_neurons
2.0170827164631888e-7	0.2512207283673886	0.998	0.992	0.00679676	active	Dlgap1	3	glut_neurons
2.0586203594300788e-7	0.5135938298616837	0.416	0.234	0.00693673	active	Hs6st3	3	glut_neurons
2.0798380194942545e-7	0.38047616271000506	0.601	0.391	0.00700822	active	Tmem132d	3	glut_neurons
2.1774367255981823e-7	0.27482943892916223	0.37	0.186	0.00733709	active	Ano2	3	glut_neurons
9.59175427960201e-7	0.3966828056621612	0.522	0.34	0.0323204	active	Meis2	3	glut_neurons
1.213696158713925e-6	0.26131383713929646	0.945	0.83	0.0408967	active	Sntg1	3	glut_neurons
0	2.0387081867143073	1	0	0	active	Homer1	0	glut_neurons
8.711718636798412e-12	0.4269769330185535	0.216	0.095	2.935500711855593e-7	active	1700016P03Rik	0	glut_neurons
6.545088694626752e-11	0.29426819262602066	0.977	0.941	2.2054330865414303e-6	active	Dlgap1	0	glut_neurons
2.1263663819700173e-8	0.5613806482495107	0.75	0.639	7.165004160686171e-4	active	Pde10a	0	glut_neurons
8.672106381923702e-8	0.25135430193969277	0.46	0.307	0.00292215	active	Shc3	0	glut_neurons
1.9123285168717387e-7	0.26453817024492077	0.873	0.746	0.00644378	active	Pak3	0	glut_neurons
2.0086572491913406e-7	0.2749176500292959	0.315	0.198	0.00676837	active	Spred2	0	glut_neurons
3.2282498343435156e-7	0.26998333845681644	0.782	0.662	0.0108779	active	Arhgap26	0	glut_neurons
1.3202105588180327e-6	0.2730367858699152	0.549	0.421	0.0444858	active	Prkca	0	glut_neurons
9.9698911326301e-105	2.5171528411917046	1	0	3.3594545160510386e-100	active	Homer1	4	glut_neurons
3.540515475706956e-8	0.3625966448535669	0.931	0.808	0.00119301	active	Thrb	4	glut_neurons
4.369621263341089e-8	0.4253219363369749	0.909	0.776	0.00147239	active	Luzp2	4	glut_neurons
1.014318674852774e-7	0.6810247852169588	0.261	0.084	0.00341785	active	Pcsk1	4	glut_neurons
2.0235993636568834e-7	0.31250617392988245	0.986	0.93	0.00681872	active	Oxr1	4	glut_neurons
2.8851790045270814e-7	0.40362249214169676	0.582	0.355	0.0097219	active	Dok5	4	glut_neurons
8.450380313184052e-7	0.9836589400444848	0.484	0.28	0.028474401503304984	active	Elmo1	4	glut_neurons
1.301324565882099e-6	0.5981025017910169	0.652	0.472	0.0438494	active	Sorcs3	4	glut_neurons
1.430880284244772e-6	0.27616015783653824	0.449	0.243	0.0482149	active	Tmtc2	4	glut_neurons
1.4555676684605567e-6	0.4492293450117975	0.346	0.164	0.0490468	active	Mapk4	4	glut_neurons
4.694212543956086e-87	1.9369903903177892	1	0	1.5817618588114427e-82	active	Homer1	7	glut_neurons
3.5589062579214636e-7	0.7551354556972534	0.893	0.75	0.011992090526692164	active	Pde10a	7	glut_neurons
1.461275277714073e-6	-0.419364	0.695	0.675	0.049239131757853404	inactive	Mt3	1	glut_neurons
3.0118703800296383e-170	2.3528269689381984	1	0	1.0148798432547869e-165	active	Homer1	1	glut_neurons
1.254516736262758e-18	0.36547059461374776	0.997	0.968	4.227219594510989e-14	active	Phactr1	1	glut_neurons
1.3508411615685697e-16	0.7329141037100495	0.914	0.788	4.5517943780214525e-12	active	Ntrk2	1	glut_neurons
1.4277329551281407e-16	0.6771630725268865	0.947	0.838	4.810888965599783e-12	active	Pde10a	1	glut_neurons
1.4791734625025274e-14	0.2667708986418553	1	0.989	4.984222899248517e-10	active	Dlg2	1	glut_neurons
4.425254975653071e-14	0.5113896788808674	0.971	0.865	1.4911339165960588e-9	active	Opcml	1	glut_neurons
5.290758647616656e-14	0.37905552134969867	0.985	0.95	1.7827740339009085e-9	active	Plcb1	1	glut_neurons
8.856012632618647e-11	0.46842668527657405	0.493	0.279	2.9841220166871794e-6	active	Rph3a	1	glut_neurons
1.147166893659981e-10	0.4327682108086126	0.622	0.393	3.865493564876672e-6	active	Gm49678	1	glut_neurons
1.5305087875686484e-10	0.5193298641966217	0.766	0.599	5.1572024105913175e-6	active	Nfib	1	glut_neurons
2.179141336437923e-10	0.2574011109096822	0.337	0.143	7.342834647261225e-6	active	Synj2	1	glut_neurons
2.909261463247669e-10	0.30742488896211695	0.952	0.857	9.803047426559346e-6	active	Atxn1	1	glut_neurons
3.419294862197068e-10	0.48700829860843275	0.271	0.103	1.1521655967659242e-5	active	1700016P03Rik	1	glut_neurons
3.496050277870816e-10	0.5697482418129376	0.716	0.509	1.17802910163135e-5	active	Pam	1	glut_neurons
1.1435604940871739e-9	0.5548634561778918	0.373	0.186	3.8533414408761415e-5	active	B230216N24Rik	1	glut_neurons
2.0512209280219333e-9	0.2556252050867993	0.992	0.95	6.911794039062706e-5	active	Sorbs2	1	glut_neurons
3.708096420937302e-9	0.2832910379457414	0.835	0.637	1.2494801699990333e-4	active	Cacng3	1	glut_neurons
3.876188540537915e-9	0.27307497717792234	0.284	0.117	1.306120490619656e-4	active	Dok5	1	glut_neurons
5.960419395313537e-9	0.31361501350563037	0.976	0.912	2.0084229194448493e-4	active	Dclk1	1	glut_neurons
6.048654057795262e-9	0.2783401536975479	0.399	0.21	2.0381544713146915e-4	active	Hnrnpll	1	glut_neurons
1.8220518191371772e-8	0.2752076836981239	0.942	0.828	6.139585809764632e-4	active	ENSMUSG00000121513	1	glut_neurons
2.048100894437931e-8	0.2982019198175596	0.964	0.905	6.901280773898052e-4	active	Rgs6	1	glut_neurons
2.225240225987452e-8	0.2936018517524408	0.954	0.859	7.498169465487319e-4	active	Mapk10	1	glut_neurons
2.3335776839902656e-8	0.2636403092678695	0.198	0.066	7.863223363973599e-4	active	Antxr1	1	glut_neurons
2.9072569631125758e-8	0.3414464289730854	0.899	0.748	9.796293062904135e-4	active	Dlg1	1	glut_neurons
5.029806044606162e-8	0.29571008557147116	0.687	0.488	0.00169484	active	Spred2	1	glut_neurons
5.535350620308573e-8	0.357783	0.447	0.263	0.00186519	active	Peak1	1	glut_neurons
5.571564883230958e-8	0.39328054999103346	0.283	0.133	0.00187739	active	Lrrk2	1	glut_neurons
6.287835044209807e-8	0.46631220572183896	0.807	0.653	0.00211875	active	Brinp3	1	glut_neurons
7.22823501700251e-8	0.31090108162030816	0.992	0.947	0.00243563	active	Dpp10	1	glut_neurons
7.714880930139986e-8	0.4075713911549055	0.58	0.406	0.00259961	active	Sox5	1	glut_neurons
1.1158089969471161e-7	0.26542937723524407	0.979	0.947	0.00375983	active	Cntnap5a	1	glut_neurons
1.122011678760452e-7	0.28314	0.9	0.745	0.00378073	active	Hecw1	1	glut_neurons
1.1278642204057081e-7	0.2544515628359576	0.44	0.249	0.00380045	active	Gm14636	1	glut_neurons
1.1693228257392449e-7	0.2679560301163335	0.417	0.233	0.00394015	active	Bach2	1	glut_neurons
1.1850428344017741e-7	0.2934749466489466	0.763	0.57	0.00399312	active	Galnt18	1	glut_neurons
1.8178064293096052e-7	0.3749810843427617	0.845	0.716	0.00612528	active	Thrb	1	glut_neurons
2.3208466090599707e-7	0.2684264509887595	0.932	0.844	0.00782032	active	Hivep2	1	glut_neurons
2.3744558607425422e-7	0.262295	0.242	0.109	0.00800097	active	Ptchd1	1	glut_neurons
3.154905055810113e-7	0.271379	0.891	0.748	0.010630768076057756	active	Zdhhc14	1	glut_neurons
3.2692898092946607e-7	0.4335764647694855	0.759	0.597	0.011016198941399288	active	Sorcs3	1	glut_neurons
3.2790943482207183e-7	0.3270654389796348	0.623	0.408	0.011049236315764533	active	Mapk4	1	glut_neurons
4.132618766951478e-7	0.3214680604856466	0.195	0.077	0.0139253	active	Pcsk1	1	glut_neurons
5.903941644834118e-7	0.2928553816859786	0.528	0.337	0.019893921766433044	active	Sh3rf1	1	glut_neurons
6.825968260144836e-7	0.3234801588408597	0.468	0.297	0.0230008	active	Kitl	1	glut_neurons
8.204853905767613e-7	0.33766664752691833	0.762	0.589	0.0276471	active	Mast4	1	glut_neurons
8.451795174832811e-7	0.2696312770679139	0.726	0.531	0.028479169021116642	active	Epha7	1	glut_neurons
1.0307096661807914e-6	0.32358666830924454	0.961	0.891	0.0347308	active	Oxr1	1	glut_neurons
1.1309466386048415e-6	0.27418941387274076	0.825	0.695	0.0381084	active	Alcam	1	glut_neurons
1.65934020020489e-108	2.489097752933795	1	0	5.591312738610397e-104	active	Homer1	2	glut_neurons
2.211559086977324e-21	1.0010336128307826	0.925	0.749	7.452069499478791e-17	active	Pde10a	2	glut_neurons
9.849608223157982e-16	0.3222501670329967	0.998	1	3.318923986875314e-11	active	Nrg3	2	glut_neurons
1.4739442185136786e-14	0.3219403023034051	1	0.995	4.966602438703691e-10	active	Phactr1	2	glut_neurons
5.195104172870321e-13	0.41298411069056584	0.991	0.972	1.7505423020903836e-8	active	Oxr1	2	glut_neurons
2.5737405380618604e-11	0.29140640567097353	0.998	0.991	8.672476117053245e-7	active	Dlgap1	2	glut_neurons
3.965686131409357e-10	0.3742319636414897	0.97	0.884	1.336277598839697e-5	active	Hivep2	2	glut_neurons
7.016541869059191e-10	0.3573321199216206	0.987	0.926	2.3642939481981852e-5	active	Rims1	2	glut_neurons
8.623621563328196e-10	0.27257115394651477	0.994	0.986	2.9058155219790687e-5	active	Lrrc7	2	glut_neurons
1.1581403096207172e-9	0.3530029507045178	0.491	0.223	3.9024695872979686e-5	active	Fam171a1	2	glut_neurons
1.33533584450126e-9	0.47591409926148387	0.989	0.958	4.4995476616314455e-5	active	R3hdm1	2	glut_neurons
2.193594026170506e-9	0.48035957506110094	0.574	0.316	7.391534430584138e-5	active	Zfp385b	2	glut_neurons
2.794708375497333e-9	0.42568565326017005	0.984	0.972	9.417049342075812e-5	active	Tafa1	2	glut_neurons
3.954674801537473e-9	0.27818902366148457	0.995	0.967	1.3325672211260672e-4	active	Nav3	2	glut_neurons
4.463385179859641e-9	0.6183335051581635	0.933	0.8	1.5039822702055046e-4	active	Ntrk2	2	glut_neurons
8.999826238716718e-9	0.3410838208680054	0.309	0.102	3.0325814493979854e-4	active	Grb14	2	glut_neurons
1.3066956681941797e-8	0.3509916304192173	0.983	0.916	4.403041723547108e-4	active	Dmd	2	glut_neurons
2.176340316667972e-8	0.3930838698918986	0.792	0.53	7.333396331044398e-4	active	Pid1	2	glut_neurons
2.2868006797834635e-8	0.43296000625852304	0.773	0.535	7.705603570598359e-4	active	Plcl1	2	glut_neurons
2.3058183306008426e-8	0.42864309138867407	0.887	0.716	7.769685446792599e-4	active	Pde4b	2	glut_neurons
2.7994981265160518e-8	0.28244033273985103	0.994	0.972	9.433188887108488e-4	active	Magi2	2	glut_neurons
3.0496188216443227e-8	0.38806098269489686	0.911	0.786	0.0010276	active	Trim9	2	glut_neurons
3.651873780322845e-8	0.34697053614563567	0.98	0.926	0.00123054	active	Atxn1	2	glut_neurons
5.02022028034633e-8	0.36988324697842145	0.683	0.405	0.00169161	active	Lin7a	2	glut_neurons
6.245064023609677e-8	0.3818987319321302	0.545	0.312	0.00210434	active	Shc3	2	glut_neurons
6.739444251161505e-8	0.2649112442014281	0.995	0.981	0.00227092	active	Kcnma1	2	glut_neurons
6.793802382793954e-8	0.27681243653729926	0.997	1	0.00228924	active	Rbfox1	2	glut_neurons
9.022720474259579e-8	0.5239529110816648	0.856	0.702	0.0030403	active	Pcdh15	2	glut_neurons
9.041653904762966e-8	0.5481942563189821	0.459	0.237	0.00304668	active	Kcnh5	2	glut_neurons
9.31925902348021e-8	0.2903269669962345	0.677	0.395	0.00314022	active	Fhod3	2	glut_neurons
1.1016303471688886e-7	0.5653019367070624	0.856	0.684	0.00371205	active	Chsy3	2	glut_neurons
1.1336493866216537e-7	0.3426069677942536	1	1	0.00381994	active	Lrrtm4	2	glut_neurons
1.16013085718689e-7	0.44699282490722325	0.408	0.195	0.00390918	active	Scube1	2	glut_neurons
1.1968528679322667e-7	0.2515278914388106	0.987	0.967	0.00403292	active	Dlgap2	2	glut_neurons
1.4816223590066245e-7	0.2856600706728334	0.948	0.823	0.00499247	active	Pclo	2	glut_neurons
1.9669755581602856e-7	0.3382923742859507	0.937	0.837	0.00662792	active	Gpr158	2	glut_neurons
4.0017190534387356e-7	0.33201699898473613	0.961	0.902	0.013484192522467164	active	Agbl4	2	glut_neurons
4.2816144114832566e-7	0.3934367016915925	0.755	0.553	0.014427327920933982	active	Ptprr	2	glut_neurons
5.150636443215303e-7	0.274562	0.962	0.958	0.017355584559058286	active	Car10	2	glut_neurons
5.187595196825805e-7	0.292965	0.547	0.307	0.0174801	active	Ptpn9	2	glut_neurons
5.425271666374201e-7	0.3449078239981633	0.204	0.056	0.018280995407014507	active	Htr2a	2	glut_neurons
7.499902111844994e-7	0.40827717128618746	0.707	0.53	0.025271670156072894	active	Ndst3	2	glut_neurons
8.122285595521787e-7	0.3481053016197203	0.519	0.298	0.027368853542670216	active	Mcu	2	glut_neurons
8.233254186746635e-7	0.26322721958507733	0.987	0.953	0.027742773307661464	active	Plcb1	2	glut_neurons
8.397903222246887e-7	0.3426554031123923	0.759	0.507	0.028297574697683108	active	Nmt2	2	glut_neurons
8.782112739798807e-7	0.45140982902955373	0.221	0.07	0.0295922	active	Pcsk1	2	glut_neurons
9.028722195988747e-7	0.5206207680575274	0.842	0.721	0.030423182311603684	active	Gpc6	2	glut_neurons
9.030105318374007e-7	0.4887512158254379	0.541	0.326	0.030427842880793053	active	Zfp804a	2	glut_neurons
9.214483077465211e-7	0.2910991073300185	0.284	0.112	0.031049122177826776	active	9630014M24Rik	2	glut_neurons
1.0066417674595908e-6	0.34357045217457793	0.854	0.66	0.0339198	active	Nol4	2	glut_neurons
1.0214188029108788e-6	0.33944476349388397	0.781	0.563	0.0344177	active	Asap1	2	glut_neurons
1.0332855603970237e-6	0.31784866930840106	0.851	0.674	0.0348176	active	Cap2	2	glut_neurons
1.0406709196102867e-6	0.3781259232713401	0.795	0.614	0.0350664	active	Slc2a13	2	glut_neurons
1.1333213503471865e-6	0.31561379583728977	0.735	0.535	0.0381884	active	Plcl2	2	glut_neurons
1.159409274262028e-6	0.5802776497018964	0.492	0.298	0.039067454905533296	active	Inpp4b	2	glut_neurons
1.2413207356833407e-6	0.33002511090720915	0.298	0.126	0.0418275	active	Ndst4	2	glut_neurons
1.4060308092693406e-6	0.3191686081293512	0.959	0.884	0.0473776	active	Enox1	2	glut_neurons
1.7104295937341846e-7	-0.514779	0.907	0.926	0.00576346	inactive	Fth1	2	glut_neurons
9.83191151297665e-7	-0.421819	0.884	0.901	0.033129609034126116	inactive	Cox4i1	2	glut_neurons
9.237456687940739e-11	2.1374959415754198	1	0	3.1126534055685113e-6	active	Homer1	13	glut_neurons
5.649943454116644e-25	3.4643119260829147	1	0	1.9038049462991445e-20	active	Homer1	11	glut_neurons
8.171908592475863e-140	1.7840905034270975	1	0	2.753606319320667e-135	active	Homer1	5	glut_neurons
4.1736302862176885e-8	0.3889694878351928	0.164	0.041	0.00140635	active	Sema3e	5	glut_neurons
4.5209715028589107e-8	0.9308865413791101	0.616	0.433	0.00152339	active	Dpp10	5	glut_neurons
4.9099886839020816e-8	0.400807	0.738	0.54	0.00165447	active	Gm10649	5	glut_neurons
7.761637950582463e-8	0.30320988392799286	0.246	0.095	0.00261536	active	Thsd4	5	glut_neurons
1.4472270384772526e-7	0.41953886647556793	0.511	0.3	0.00487658	active	Ldb2	5	glut_neurons
1.7222392224035743e-7	0.43903058063156597	0.643	0.433	0.00580326	active	Prkcb	5	glut_neurons
1.8408234542464435e-7	0.33637205549091376	0.354	0.174	0.00620284	active	Bcl11a	5	glut_neurons
2.4045145162517335e-7	0.3018377782654018	0.952	0.886	0.00810225	active	Ppp2r2b	5	glut_neurons
3.2343108803177724e-7	0.4319630472337168	0.434	0.248	0.010898333942318766	active	Cdh18	5	glut_neurons
5.569353118576287e-7	0.26418080810701117	0.976	0.926	0.018766492268354657	active	Tmem178b	5	glut_neurons
5.848773905918046e-7	0.26425592368730655	0.963	0.886	0.019708028553381447	active	Dpp6	5	glut_neurons
9.76557812744826e-7	0.26091156248924574	0.349	0.177	0.0329061	active	Gm43507	5	glut_neurons
1.1230902006921237e-6	0.468134	0.328	0.174	0.0378436	active	Gm10754	5	glut_neurons
1.3197645479535413e-6	0.3673474753737336	0.333	0.174	0.044470786207842526	active	Raver2	5	glut_neurons
4.330058197475358e-59	2.0783564434106676	1	0	1.4590564102212966e-54	active	Homer1	9	glut_neurons
2.8811117631508016e-15	2.3947805749765054	1	0	9.708194197112942e-11	active	Homer1	12	glut_neurons
5.806077613962542e-7	-0.451086	0.865	0.83	0.0195642	inactive	Tmsb4x	6	glut_neurons
1.2692157687144443e-118	2.042371887437615	1	0	4.276749454260191e-114	active	Homer1	6	glut_neurons
3.583695810765742e-10	0.41902513619987136	0.99	0.982	1.2075621403956244e-5	active	Nkain2	6	glut_neurons
4.788063086091843e-9	0.34383089222229346	0.988	0.968	1.6133857374895074e-4	active	Ctnnd2	6	glut_neurons
1.697480426657905e-8	0.5845806044042328	0.9	0.815	5.719830045666477e-4	active	Dcc	6	glut_neurons
4.430179664453001e-8	0.35476665458099965	0.393	0.185	0.00149279	active	Neurl1a	6	glut_neurons
5.353316001309056e-8	0.33312976573497854	0.976	0.9	0.00180385	active	Dclk1	6	glut_neurons
3.3034164971175276e-7	0.31568700123941884	0.966	0.911	0.011131192228687222	active	Dlgap2	6	glut_neurons
4.832219210723439e-7	0.3811873770196077	0.519	0.302	0.0162826	active	Spred1	6	glut_neurons
6.074826808875513e-7	0.29015730926355443	0.41	0.206	0.0204697	active	9630014M24Rik	6	glut_neurons
7.032211679088346e-7	0.29983397155236724	0.701	0.466	0.0236957	active	Trip12	6	glut_neurons
9.467671274587229e-7	0.4156507235835434	0.638	0.456	0.0319023	active	Bach2	6	glut_neurons
1.1488639014657154e-6	0.3924055869707135	0.65	0.438	0.038712118023788746	active	Ghr	6	glut_neurons
6.253178162890743e-45	2.1316663961891127	1	0	2.1070709137676647e-40	active	Homer1	10	glut_neurons
1.1572296233331507e-7	2.32452	1	0	0.0038994	active	Homer1	14	glut_neurons
0	1.9625386625462293	1	0	0	active	Homer1	NA	gaba_neurons
5.3353160059543786e-42	0.4887076158718049	0.869	0.758	1.7977880813663874e-37	active	Pde10a	NA	gaba_neurons
2.207910077216455e-31	0.43800779371261145	0.428	0.288	7.439773796188566e-27	active	Pdzd2	NA	gaba_neurons
5.089208640306153e-30	0.5422569558042025	0.531	0.397	1.7148597434375613e-25	active	Pde7b	NA	gaba_neurons
3.0650228091694974e-27	0.2959564460737478	0.193	0.1	1.0327900857777539e-22	active	1700016P03Rik	NA	gaba_neurons
2.2988864611297877e-26	0.28549724510363284	0.995	0.984	7.746327819422933e-22	active	Celf2	NA	gaba_neurons
1.3736610965209182e-24	0.526038	0.936	0.893	4.628688430836886e-20	active	Phactr1	NA	gaba_neurons
6.619442814514728e-23	0.31844870178958185	0.509	0.388	2.230487450778883e-18	active	Slit3	NA	gaba_neurons
9.578143122503347e-23	0.31889667593301085	0.222	0.13	3.227451106558728e-18	active	Gm10754	NA	gaba_neurons
6.629287467025723e-21	0.3094685037154128	0.68	0.568	2.2338047048889877e-16	active	Ryr3	NA	gaba_neurons
1.6804494198941464e-20	0.31523195737627785	0.563	0.44	5.662442365275316e-16	active	Camk4	NA	gaba_neurons
2.0531177476407674e-20	0.2793946009559989	0.636	0.511	6.91818556245033e-16	active	Brinp1	NA	gaba_neurons
2.2616543877514837e-19	0.25151232979191496	0.476	0.349	7.6208706249674e-15	active	Sik2	NA	gaba_neurons
1.242320719118637e-18	0.29008764170967005	0.289	0.191	4.1861238951421594e-14	active	Mir670hg	NA	gaba_neurons
3.678114249967575e-18	0.3818353776004386	0.838	0.771	1.2393773776690742e-13	active	Nrg1	NA	gaba_neurons
6.365834220642451e-16	0.34684816952208153	0.717	0.612	2.1450314989876804e-11	active	Foxp1	NA	gaba_neurons
4.887959603584522e-15	0.28691459731794744	0.877	0.81	1.6470468680238405e-10	active	Ntrk2	NA	gaba_neurons
8.978032955248983e-15	0.29460503214345835	0.53	0.429	3.0252379846006973e-10	active	Hs6st3	NA	gaba_neurons
4.5446265524309025e-14	0.26620535247608235	0.698	0.594	1.5313573631071168e-9	active	Mctp1	NA	gaba_neurons
1.7962861738004472e-12	0.37543196909486154	0.277	0.206	6.052765891237987e-8	active	Rarb	NA	gaba_neurons
6.325090714674928e-12	0.28389708483491916	0.761	0.707	2.1313025672168637e-7	active	Kcnq5	NA	gaba_neurons
3.697293841089186e-10	0.2548183536388555	0.301	0.228	1.2458401326934121e-5	active	Rgs9	NA	gaba_neurons
4.902332624498822e-7	0.26594538044563354	0.287	0.227	0.016518900011511232	active	Pde1c	NA	gaba_neurons
1.6636310874318241e-93	1.760056956148496	1	0	5.605771312210275e-89	active	Homer1	7	gaba_neurons
5.266377684115787e-7	0.4070004609713641	0.569	0.303	0.017745586244396556	active	Arhgap5	7	gaba_neurons
1.125131709467792e-6	0.32270681301806536	0.481	0.227	0.0379124	active	Ccdc47	7	gaba_neurons
2.742911309064002e-301	2.0104122898357915	1	0	9.242513947022062e-297	active	Homer1	0	gaba_neurons
1.2878329943811389e-12	0.29690448573214745	0.987	0.971	4.339482057866686e-8	active	Dlgap1	0	gaba_neurons
7.09162433273715e-11	0.36599836170299793	0.255	0.121	2.38959373515911e-6	active	1700016P03Rik	0	gaba_neurons
1.8433457285780297e-10	0.5676678014413734	0.808	0.692	6.211337767016529e-6	active	Pde10a	0	gaba_neurons
1.4865070303560461e-9	0.4947355318875766	0.89	0.808	5.008934089487733e-5	active	Ntrk2	0	gaba_neurons
3.429776783853263e-8	0.2943692024800999	0.82	0.686	0.0011557	active	Arhgap26	0	gaba_neurons
6.959117685673696e-8	0.30935921965242086	0.95	0.916	0.00234494	active	Phactr1	0	gaba_neurons
1.0258800198212023e-7	0.27936843482773854	0.905	0.798	0.00345681	active	Lncpint	0	gaba_neurons
1.2546713515009967e-7	0.35349445058954665	0.34	0.208	0.00422774	active	Mir670hg	0	gaba_neurons
4.434455744494117e-7	0.3000893581910322	0.739	0.597	0.014942342076647377	active	Rasal2	0	gaba_neurons
4.471402912165358e-7	0.2725757149618988	0.953	0.898	0.015066839252832389	active	Grip1	0	gaba_neurons
6.266994855011508e-7	0.34111036713255727	0.665	0.524	0.021117265863446776	active	Prkca	0	gaba_neurons
3.316088284445414e-41	1.9897269042264145	1	0	1.1173891083267267e-36	active	Homer1	9	gaba_neurons
1.7707892362134344e-111	1.8621863861068706	1	0	5.966851410344788e-107	active	Homer1	5	gaba_neurons
3.013277723791861e-153	1.8408049948032732	1	0	1.0153540618089055e-148	active	Homer1	2	gaba_neurons
3.214770248196341e-225	2.123974370506945	1	0	1.083248982832239e-220	active	Homer1	1	gaba_neurons
1.7204367157817453e-9	0.6639683646550711	0.749	0.616	5.797183557498169e-5	active	Pde10a	1	gaba_neurons
4.2898630083684764e-8	0.4152458459650048	0.898	0.843	0.00144551	active	Elmo1	1	gaba_neurons
1.3402077803832665e-7	0.3722443096812763	0.295	0.154	0.00451596	active	Chrm2	1	gaba_neurons
1.8831225684885838e-7	0.3485209662381034	0.198	0.087	0.00634537	active	Kcnh8	1	gaba_neurons
2.223670033071075e-7	0.575275	0.554	0.409	0.00749288	active	Chsy3	1	gaba_neurons
2.8412217273178493e-07	0.43226051656306796	0.452	0.284	0.00957378	active	Ptprm	1	gaba_neurons
3.101788077728627e-7	0.25585650213607014	0.992	0.983	0.010451785106714382	active	Epha6	1	gaba_neurons
4.2873470359031464e-7	0.3159936345821954	0.964	0.931	0.014446644572179241	active	Lrrtm4	1	gaba_neurons
1.0932569007538376e-6	0.285772	0.165	0.069	0.0368384	active	1700016P03Rik	1	gaba_neurons
1.1101875766051079e-6	0.5442043655437601	0.185	0.083	0.0374089	active	Mir670hg	1	gaba_neurons
1.4421861524762725e-6	0.335459	0.617	0.453	0.0485959	active	Trps1	1	gaba_neurons
6.371632682426088e-138	1.821011860304419	1	0	2.1469853486702945e-133	active	Homer1	4	gaba_neurons
1.2450394829948661e-7	0.3222024669429433	0.529	0.306	0.00419529	active	Kcmf1	4	gaba_neurons
5.75050942409663e-7	0.5018585566256206	0.842	0.704	0.019376916555436004	active	Pde10a	4	gaba_neurons
1.7173927975292383e-122	2.102344177825892	1	0	5.786926770554521e-118	active	Homer1	3	gaba_neurons
2.4354445207154813e-9	0.5228034653650533	0.942	0.864	8.206473857002886e-5	active	Pde7b	3	gaba_neurons
6.007342147980469e-8	0.4161724739386963	0.9	0.81	0.00202423	active	Dgki	3	gaba_neurons
2.0954484629478582e-7	0.4003	0.968	0.922	0.00706082	active	Pde10a	3	gaba_neurons
2.71241443952444e-7	0.3529060028595481	0.998	0.99	0.00913975	active	Phactr1	3	gaba_neurons
3.3179636046433236e-20	1.9836832422872726	1	0	1.1180210162206143e-15	active	Homer1	10	gaba_neurons
4.1824035694344526e-86	1.8135325335865098	1	0	1.4093027067566332e-81	active	Homer1	8	gaba_neurons
1.6616976901588074e-8	0.4966578642759031	0.431	0.164	5.599256536759118e-4	active	Ints6l	8	gaba_neurons
6.798432231702338e-7	0.2838532684409525	0.201	0.045	0.022908	active	Iglon5	8	gaba_neurons
1.0730975165935713e-6	0.6764606495916028	0.792	0.593	0.0361591	active	Hdac9	8	gaba_neurons
4.966874133098126e-98	1.9420284252735212	1	0	1.6736379078887446e-93	active	Homer1	6	gaba_neurons

## Sheet: Table_S10_GO_Homer1pos_vs_neg
ID	Description	GeneRatio	BgRatio	pvalue	p.adjust	qvalue	geneID	Count	subcluster	cell_type	upreg_in
GO:0035418	protein localization to synapse	10/129	100/28564	3.040675922228331e-11	6.272914427557047e-8	4.772260842149938e-8	Homer1/Dlgap1/Dlg2/Cacng3/Mapk10/Dlg1/Lrrc7/Magi2/Pclo/Gpc6	10	8	glut_neurons	Homer1+
GO:1902414	protein localization to cell junction	10/129	133/28564	5.229388041326033e-10	5.394113764627803e-7	4.1036934576932185e-7	Homer1/Dlgap1/Dlg2/Cacng3/Mapk10/Dlg1/Lrrc7/Magi2/Pclo/Gpc6	10	8	glut_neurons	Homer1+
GO:1990778	protein localization to cell periphery	14/129	389/28564	2.8280141172333937e-9	1.9447310412841635e-6	1.479497911857891e-6	Lin7a/Cacnb2/Dlg2/Cacng3/Mapk10/Dlg1/Dpp10/Lrrc7/Pid1/Magi2/Gpr158/Ptpn9/Gpc6/Dpp6	14	8	glut_neurons	Homer1+
GO:0007269	neurotransmitter secretion	10/129	169/28564	5.397142843957603e-9	2.2268611374169073e-6	1.6941347327033234e-6	Lin7a/Kcnh1/Prkca/Ntrk2/Rph3a/Lrrk2/Rims1/Trim9/Pclo/Prkcb	10	8	glut_neurons	Homer1+
GO:0099643	signal release from synapse	10/129	169/28564	5.397142843957603e-9	2.2268611374169073e-6	1.6941347327033234e-6	Lin7a/Kcnh1/Prkca/Ntrk2/Rph3a/Lrrk2/Rims1/Trim9/Pclo/Prkcb	10	8	glut_neurons	Homer1+
GO:0050807	regulation of synapse organization	12/129	305/28564	1.5218552016035325e-8	5.17237765731671e-6	3.935002723197803e-6	Homer1/Lingo2/Lrrtm4/Pak3/Prkca/Ntrk2/Lrrk2/Epha7/Magi2/Zfp804a/Asap1/Neurl1a	12	8	glut_neurons	Homer1+
GO:0050803	regulation of synapse structure or activity	12/129	313/28564	2.0256890336095674e-8	5.17237765731671e-6	3.935002723197803e-6	Homer1/Lingo2/Lrrtm4/Pak3/Prkca/Ntrk2/Lrrk2/Epha7/Magi2/Zfp804a/Asap1/Neurl1a	12	8	glut_neurons	Homer1+
GO:0099173	postsynapse organization	11/129	251/28564	2.0693490017487203e-8	5.17237765731671e-6	3.935002723197803e-6	Homer1/Lrrtm4/Pak3/Rph3a/Sorbs2/Lrrk2/Epha7/Magi2/Zfp804a/Asap1/Ctnnd2	11	8	glut_neurons	Homer1+
GO:1903539	protein localization to postsynaptic membrane	7/129	67/28564	2.2575402319277596e-8	5.17237765731671e-6	3.935002723197803e-6	Dlg2/Cacng3/Mapk10/Dlg1/Lrrc7/Magi2/Gpc6	7	8	glut_neurons	Homer1+
GO:0062237	protein localization to postsynapse	7/129	68/28564	2.5072116613265683e-8	5.17237765731671e-6	3.935002723197803e-6	Dlg2/Cacng3/Mapk10/Dlg1/Lrrc7/Magi2/Gpc6	7	8	glut_neurons	Homer1+
GO:0099003	vesicle-mediated transport in synapse	11/129	271/28564	4.5321664696233295e-8	8.499872206211753e-6	6.466469096850129e-6	Kcnh1/Prkca/Rph3a/Synj2/Mapk10/Lrrk2/Rims1/Magi2/Trim9/Pclo/Prkcb	11	8	glut_neurons	Homer1+
GO:0034765	regulation of monoatomic ion transmembrane transport	14/129	492/28564	5.394098935598309e-8	8.704542443567784e-6	6.622176586656922e-6	Homer1/Cacnb2/Kcnh1/Prkca/Plcb1/Cacng3/Dlg1/Dpp10/Hecw1/Dmd/Pde4b/Kcnma1/Kcnh5/Dpp6	14	8	glut_neurons	Homer1+
GO:0016079	synaptic vesicle exocytosis	8/129	115/28564	5.485169741462977e-8	8.704542443567784e-6	6.622176586656922e-6	Kcnh1/Prkca/Rph3a/Lrrk2/Rims1/Trim9/Pclo/Prkcb	8	8	glut_neurons	Homer1+
GO:0006836	neurotransmitter transport	10/129	225/28564	8.177011763804759e-8	1.2049410906235156e-5	9.166860556265335e-6	Lin7a/Kcnh1/Prkca/Ntrk2/Rph3a/Lrrk2/Rims1/Trim9/Pclo/Prkcb	10	8	glut_neurons	Homer1+
GO:0099504	synaptic vesicle cycle	10/129	231/28564	1.0454975622670169e-7	1.4379076473045706e-5	1.0939206072562262e-5	Kcnh1/Prkca/Rph3a/Synj2/Lrrk2/Rims1/Magi2/Trim9/Pclo/Prkcb	10	8	glut_neurons	Homer1+
GO:0097120	receptor localization to synapse	7/129	86/28564	1.2992292806668123e-7	1.6751937537597713e-5	1.2744413536014587e-5	Dlg2/Cacng3/Mapk10/Dlg1/Lrrc7/Magi2/Gpc6	7	8	glut_neurons	Homer1+
GO:0001505	regulation of neurotransmitter levels	10/129	242/28564	1.611325406399108e-7	1.9459307197580197e-5	1.4804105942593605e-5	Lin7a/Kcnh1/Prkca/Ntrk2/Rph3a/Lrrk2/Rims1/Trim9/Pclo/Prkcb	10	8	glut_neurons	Homer1+
GO:0099072	regulation of postsynaptic membrane neurotransmitter receptor levels	8/129	133/28564	1.6978552087079184e-7	1.9459307197580197e-5	1.4804105942593605e-5	Dlg2/Cacng3/Mapk10/Dlg1/Lrrc7/Magi2/Gpc6/Ctnnd2	8	8	glut_neurons	Homer1+
GO:0016358	dendrite development	11/129	327/28564	2.997334732996651e-7	3.254474502195838e-5	2.475914729583383e-5	Dab1/Pak3/Phactr1/Ntrk2/Dclk1/Lrrk2/Hecw1/Asap1/Bcl11a/Ctnnd2/Neurl1a	11	8	glut_neurons	Homer1+
GO:0042391	regulation of membrane potential	13/129	488/28564	3.507317492914528e-7	3.6086627822349535e-5	2.745371435728406e-5	Cacnb2/Kcnh1/Ntrk2/Atxn1/Dlg1/Lrrk2/Rims1/Dmd/Pid1/Kcnma1/Kcnh5/Pclo/Dpp6	13	8	glut_neurons	Homer1+
GO:0021954	central nervous system neuron development	7/129	100/28564	3.673384315411247e-7	3.6086627822349535e-5	2.745371435728406e-5	Prkca/Ntrk2/Nfib/Dclk1/Agbl4/Sema3e/Dcc	7	8	glut_neurons	Homer1+
GO:0001764	neuron migration	9/129	204/28564	3.963343875571759e-7	3.7165356433202446e-5	2.8274381428121974e-5	Unc5d/Dab1/Phactr1/Ntrk2/Dclk1/Sh3rf1/Nrg3/Sema3e/Dcc	9	8	glut_neurons	Homer1+
GO:0007409	axonogenesis	13/129	498/28564	4.409790648961087e-7	3.9553904820898794e-5	3.009152337574819e-5	Epha6/Unc5d/Dab1/Pak3/Prkca/Ntrk2/Nfib/Dclk1/Epha7/Alcam/Sema3e/Bcl11a/Dcc	13	8	glut_neurons	Homer1+
GO:0032412	regulation of monoatomic ion transmembrane transporter activity	10/129	290/28564	8.464962410844599e-7	7.276340605655169e-5	5.5356398923549545e-5	Homer1/Cacnb2/Prkca/Plcb1/Rph3a/Cacng3/Dlg1/Hecw1/Dmd/Pde4b	10	8	glut_neurons	Homer1+
GO:0099633	protein localization to postsynaptic specialization membrane	5/129	41/28564	1.1430240895176732e-6	9.069456525672922e-5	6.899793188141096e-5	Dlg2/Cacng3/Dlg1/Magi2/Gpc6	5	8	glut_neurons	Homer1+
GO:0099645	neurotransmitter receptor localization to postsynaptic specialization membrane	5/129	41/28564	1.1430240895176732e-6	9.069456525672922e-5	6.899793188141096e-5	Dlg2/Cacng3/Dlg1/Magi2/Gpc6	5	8	glut_neurons	Homer1+
GO:0022898	regulation of transmembrane transporter activity	10/129	303/28564	1.2578009470351061e-6	9.610530939753422e-5	7.311427727209915e-5	Homer1/Cacnb2/Prkca/Plcb1/Rph3a/Cacng3/Dlg1/Hecw1/Dmd/Pde4b	10	8	glut_neurons	Homer1+
GO:0034329	cell junction assembly	12/129	477/28564	1.8354070963612224e-6	1.341925104130975e-4	1.0208997271522224e-4	Lingo2/Lrrtm4/Prkca/Ntrk2/Dlg1/Peak1/Epha7/Nrg3/Magi2/Pclo/Cdh18/Ctnnd2	12	8	glut_neurons	Homer1+
GO:0032409	regulation of transporter activity	10/129	317/28564	1.8863707232088352e-6	1.341925104130975e-4	1.0208997271522224e-4	Homer1/Cacnb2/Prkca/Plcb1/Rph3a/Cacng3/Dlg1/Hecw1/Dmd/Pde4b	10	8	glut_neurons	Homer1+
GO:0007611	learning or memory	10/129	326/28564	2.421720377332159e-6	1.665336379478748e-4	1.266942134246403e-4	Meis2/Shc3/Prkca/Sorcs3/Ntrk2/Plcb1/Atxn1/Ptchd1/Htr2a/Ctnnd2	10	8	glut_neurons	Homer1+
GO:1905475	regulation of protein localization to membrane	8/129	205/28564	4.452662308339368e-6	2.963174949065844e-4	2.2543020379402364e-4	Sorbs2/Dlg1/Dpp10/Pid1/Magi2/Ptpn9/Gpc6/Dpp6	8	8	glut_neurons	Homer1+
GO:0010469	regulation of signaling receptor activity	7/129	149/28564	5.359067865386499e-6	3.3502293958461663e-4	2.548762420188603e-4	Homer1/Tafa1/Dlgap2/Dlgap1/Rph3a/Cacng3/Neurl1a	7	8	glut_neurons	Homer1+
GO:1904375	regulation of protein localization to cell periphery	7/129	149/28564	5.359067865386499e-6	3.3502293958461663e-4	2.548762420188603e-4	Dlg1/Dpp10/Pid1/Magi2/Ptpn9/Gpc6/Dpp6	7	8	glut_neurons	Homer1+
GO:0021953	central nervous system neuron differentiation	8/129	213/28564	5.899955191581877e-6	3.5798845765392393e-4	2.723477768002656e-4	Prkca/Ntrk2/Nfib/Dclk1/Sox5/Agbl4/Sema3e/Dcc	8	8	glut_neurons	Homer1+
GO:0050890	cognition	10/129	364/28564	6.408605397568545e-6	3.745879244463071e-4	2.849761947850314e-4	Meis2/Shc3/Prkca/Sorcs3/Ntrk2/Plcb1/Atxn1/Ptchd1/Htr2a/Ctnnd2	10	8	glut_neurons	Homer1+
GO:0007416	synapse assembly	8/129	216/28564	6.5366773049282866e-6	3.745879244463071e-4	2.849761947850314e-4	Lingo2/Lrrtm4/Prkca/Ntrk2/Epha7/Nrg3/Magi2/Pclo	8	8	glut_neurons	Homer1+
GO:2000300	regulation of synaptic vesicle exocytosis	5/129	59/28564	7.15528150526146e-6	3.9895529041498356e-4	3.035142169088147e-4	Kcnh1/Prkca/Lrrk2/Rims1/Prkcb	5	8	glut_neurons	Homer1+
GO:0046928	regulation of neurotransmitter secretion	6/129	104/28564	7.973928678812595e-6	4.291107420134473e-4	3.264556554542694e-4	Kcnh1/Prkca/Ntrk2/Lrrk2/Rims1/Prkcb	6	8	glut_neurons	Homer1+
GO:0010959	regulation of metal ion transport	11/129	460/28564	8.112127454447137e-6	4.291107420134473e-4	3.264556554542694e-4	Homer1/Cacnb2/Plcb1/Dlg1/Dpp10/Hecw1/Dmd/Pde4b/Htr2a/Dpp6/Nkain2	11	8	glut_neurons	Homer1+
GO:1903305	regulation of regulated secretory pathway	7/129	161/28564	8.909121790071057e-6	4.5765565766328815e-4	3.481718425267049e-4	Kcnh1/Prkca/Rph3a/Lrrk2/Rims1/Trim9/Prkcb	7	8	glut_neurons	Homer1+
GO:0017157	regulation of exocytosis	8/129	226/28564	9.095434786328072e-6	4.5765565766328815e-4	3.481718425267049e-4	Kcnh1/Prkca/Rph3a/Lrrk2/Rims1/Trim9/Pclo/Prkcb	8	8	glut_neurons	Homer1+
GO:0097061	dendritic spine organization	6/129	108/28564	9.908892784202465e-6	4.8671537651927824e-4	3.7027967772546055e-4	Homer1/Pak3/Rph3a/Lrrk2/Zfp804a/Ctnnd2	6	8	glut_neurons	Homer1+
GO:0010976	positive regulation of neuron projection development	8/129	237/28564	1.2839495075462544e-5	6.159971707134705e-4	4.686337125462583e-4	Pak3/Ntrk2/Lrrc7/Dmd/Magi2/Zfp804a/Bcl11a/Dcc	8	8	glut_neurons	Homer1+
GO:0106027	neuron projection organization	6/129	117/28564	1.56680611954033e-5	7.346184146844774e-4	5.588774938360363e-4	Homer1/Pak3/Rph3a/Lrrk2/Zfp804a/Ctnnd2	6	8	glut_neurons	Homer1+
GO:0099601	regulation of neurotransmitter receptor activity	5/129	72/28564	1.90808220728441e-5	8.747496874728306e-4	6.654855136984924e-4	Homer1/Dlgap2/Dlgap1/Rph3a/Cacng3	5	8	glut_neurons	Homer1+
GO:0070372	regulation of ERK1 and ERK2 cascade	9/129	329/28564	1.953323919737397e-5	8.7602331443875e-4	6.664544540797387e-4	Spred2/Prkca/Dlg1/Epha7/Dmd/Ptprr/Htr2a/Dcc/Spred1	9	8	glut_neurons	Homer1+
GO:0030900	forebrain development	10/129	416/28564	2.0319302022164e-5	8.918876611005177e-4	6.785236128789814e-4	Dab1/Phactr1/Ntrk2/Plcb1/Nfib/Dclk1/Lrrk2/Ptchd1/Nrg3/Sema3e	10	8	glut_neurons	Homer1+
GO:0045055	regulated exocytosis	8/129	254/28564	2.1135342601898213e-5	9.083794122440836e-4	6.910700837594349e-4	Kcnh1/Prkca/Rph3a/Lrrk2/Rims1/Trim9/Pclo/Prkcb	8	8	glut_neurons	Homer1+
GO:0051588	regulation of neurotransmitter transport	6/129	124/28564	2.180184066903335e-5	9.179019857186898e-4	6.983145958652787e-4	Kcnh1/Prkca/Ntrk2/Lrrk2/Rims1/Prkcb	6	8	glut_neurons	Homer1+
GO:0035249	synaptic transmission, glutamatergic	6/129	127/28564	2.496169356350551e-5	0.00102277	7.780950577155724e-4	Homer1/Shc3/Ntrk2/Cacng3/Lrrk2/Htr2a	6	8	glut_neurons	Homer1+
GO:1902074	response to salt	9/129	340/28564	2.528417541671327e-5	0.00102277	7.780950577155724e-4	Homer1/Kcnh1/Dlg2/Plcb1/Sorbs2/Kcnma1/Pcdh15/Htr2a/Prkcb	9	8	glut_neurons	Homer1+
GO:0030534	adult behavior	7/129	191/28564	2.6908214996401505e-5	0.00106753	8.121487562679078e-4	Homer1/Dab1/Oxr1/Atxn1/Kcnma1/Pcdh15/Htr2a	7	8	glut_neurons	Homer1+
GO:0055074	calcium ion homeostasis	9/129	347/28564	2.9646325385693467e-5	0.00115397	8.779080665356297e-4	Inpp4b/Kcnh1/Prkca/Tmtc2/Plcb1/Dmd/Htr2a/Mcu/Prkcb	9	8	glut_neurons	Homer1+
GO:0007626	locomotory behavior	8/129	270/28564	3.266304363670578e-5	0.00124785	9.49329396926478e-4	Lsamp/Dab1/Oxr1/Atxn1/Mapk10/Lrrk2/Kcnma1/Pcdh15	8	8	glut_neurons	Homer1+
GO:0070371	ERK1 and ERK2 cascade	9/129	353/28564	3.387823422034722e-5	0.00127074	9.667454013882814e-4	Spred2/Prkca/Dlg1/Epha7/Dmd/Ptprr/Htr2a/Dcc/Spred1	9	8	glut_neurons	Homer1+
GO:0048755	branching morphogenesis of a nerve	3/129	15/28564	3.935045552015884e-5	0.00144964	0.00110285	Lrrk2/Epha7/Bcl11a	3	8	glut_neurons	Homer1+
GO:0070373	negative regulation of ERK1 and ERK2 cascade	5/129	84/28564	4.031914850319406e-5	0.00145927	0.00111017	Spred2/Dlg1/Dmd/Ptprr/Spred1	5	8	glut_neurons	Homer1+
GO:0099175	regulation of postsynapse organization	6/129	139/28564	4.1490029764828464e-5	0.00147576	0.00112272	Homer1/Pak3/Lrrk2/Epha7/Zfp804a/Asap1	6	8	glut_neurons	Homer1+
GO:0046627	negative regulation of insulin receptor signaling pathway	4/129	44/28564	4.6853426371437255e-5	0.00163828	0.00124636	Prkca/Grb14/Pid1/Prkcb	4	8	glut_neurons	Homer1+
GO:1904062	regulation of monoatomic cation transmembrane transport	9/129	371/28564	4.9773237950114825e-5	0.00170559	0.00129757	Homer1/Cacnb2/Plcb1/Dlg1/Dpp10/Hecw1/Dmd/Pde4b/Dpp6	9	8	glut_neurons	Homer1+
GO:0051966	regulation of synaptic transmission, glutamatergic	5/129	88/28564	5.0431987500516856e-5	0.00170559	0.00129757	Homer1/Ntrk2/Cacng3/Lrrk2/Htr2a	5	8	glut_neurons	Homer1+
GO:0021955	central nervous system neuron axonogenesis	4/129	46/28564	5.593024904877109e-5	0.00186103	0.00141582	Prkca/Nfib/Dclk1/Dcc	4	8	glut_neurons	Homer1+
GO:0007628	adult walking behavior	4/129	47/28564	6.092008989767581e-5	0.00199489	0.00151766	Dab1/Oxr1/Kcnma1/Pcdh15	4	8	glut_neurons	Homer1+
GO:0006887	exocytosis	9/129	382/28564	6.228871466428276e-5	0.00200784	0.00152751	Lin7a/Kcnh1/Prkca/Rph3a/Lrrk2/Rims1/Trim9/Pclo/Prkcb	9	8	glut_neurons	Homer1+
GO:1900077	negative regulation of cellular response to insulin stimulus	4/129	49/28564	7.186244429905132e-5	0.0022808	0.00173517	Prkca/Grb14/Pid1/Prkcb	4	8	glut_neurons	Homer1+
GO:0001508	action potential	6/129	154/28564	7.340759021396322e-5	0.00229454	0.00174563	Cacnb2/Ntrk2/Dlg1/Dmd/Kcnma1/Dpp6	6	8	glut_neurons	Homer1+
GO:0072659	protein localization to plasma membrane	8/129	308/28564	8.228080109838795e-5	0.00253351	0.00192743	Cacnb2/Dlg1/Dpp10/Lrrc7/Pid1/Gpr158/Ptpn9/Dpp6	8	8	glut_neurons	Homer1+
GO:0090659	walking behavior	4/129	51/28564	8.416984925072251e-5	0.00255356	0.00194268	Dab1/Oxr1/Kcnma1/Pcdh15	4	8	glut_neurons	Homer1+
GO:0007613	memory	6/129	162/28564	9.707243659450798e-5	0.00289588	0.00220311	Sorcs3/Ntrk2/Plcb1/Atxn1/Ptchd1/Htr2a	6	8	glut_neurons	Homer1+
GO:0006874	intracellular calcium ion homeostasis	8/129	316/28564	9.826073486079606e-5	0.00289588	0.00220311	Inpp4b/Kcnh1/Prkca/Plcb1/Dmd/Htr2a/Mcu/Prkcb	8	8	glut_neurons	Homer1+
GO:0006936	muscle contraction	8/129	318/28564	1.0263378702835394e-4	0.00298216	0.00226875	Homer1/Cacnb2/Prkca/Dlg1/Dmd/Pde4b/Kcnma1/Htr2a	8	8	glut_neurons	Homer1+
GO:0010977	negative regulation of neuron projection development	6/129	165/28564	1.0736874869485414e-4	0.00307641	0.00234045	Dab1/Lrrk2/Epha7/Ptpn9/Sema3e/Bcl11a	6	8	glut_neurons	Homer1+
GO:0031503	protein-containing complex localization	7/129	239/28564	1.1058584637848783e-4	0.00312519	0.00237756	Dlg2/Cacng3/Mapk10/Dlg1/Lrrc7/Magi2/Gpc6	7	8	glut_neurons	Homer1+
GO:0045664	regulation of neuron differentiation	7/129	244/28564	1.2571064818278348e-4	0.00350461	0.00266621	Dab1/Rgs6/Lrrk2/Brinp3/Sox5/Dmd/Bcl11a	7	8	glut_neurons	Homer1+
GO:0006813	potassium ion transport	7/129	245/28564	1.289282068690064e-4	0.00354639	0.00269799	Kcnh1/Dlg1/Dpp10/Kcnma1/Kcnh5/Htr2a/Dpp6	7	8	glut_neurons	Homer1+
GO:0098962	regulation of postsynaptic neurotransmitter receptor activity	3/129	23/28564	1.4916847813252558e-4	0.00404914	0.00308047	Homer1/Dlgap2/Dlgap1	3	8	glut_neurons	Homer1+
GO:0051402	neuron apoptotic process	8/129	337/28564	1.5282014449250034e-4	0.00409439	0.0031149	Pak3/Thrb/Oxr1/Ntrk2/Epha7/Kcnma1/Sema3e/Ppp2r2b	8	8	glut_neurons	Homer1+
GO:0007411	axon guidance	7/129	253/28564	1.5715324945486764e-4	0.00410073	0.00311973	Epha6/Unc5d/Nfib/Epha7/Alcam/Sema3e/Dcc	7	8	glut_neurons	Homer1+
GO:0008344	adult locomotory behavior	5/129	112/28564	1.5841239927225247e-4	0.00410073	0.00311973	Dab1/Oxr1/Atxn1/Kcnma1/Pcdh15	5	8	glut_neurons	Homer1+
GO:0030166	proteoglycan biosynthetic process	4/129	60/28564	1.591694929967432e-4	0.00410073	0.00311973	Hs6st3/Chsy3/Ndst3/Ndst4	4	8	glut_neurons	Homer1+
GO:0097485	neuron projection guidance	7/129	254/28564	1.6100800794867687e-4	0.00410073	0.00311973	Epha6/Unc5d/Nfib/Epha7/Alcam/Sema3e/Dcc	7	8	glut_neurons	Homer1+
GO:0003012	muscle system process	9/129	436/28564	1.6901754527785505e-4	0.00421913	0.0032098	Homer1/Cacnb2/Prkca/Sorbs2/Dlg1/Dmd/Pde4b/Kcnma1/Htr2a	9	8	glut_neurons	Homer1+
GO:0097479	synaptic vesicle localization	4/129	61/28564	1.6974689314446298e-4	0.00421913	0.0032098	Lin7a/Lrrk2/Magi2/Pclo	4	8	glut_neurons	Homer1+
GO:0042551	neuron maturation	4/129	63/28564	1.9241046215921225e-4	0.00466152	0.00354636	Dlg2/Lrrk2/Kcnma1/Bcl11a	4	8	glut_neurons	Homer1+
GO:1903078	positive regulation of protein localization to plasma membrane	4/129	63/28564	1.9241046215921225e-4	0.00466152	0.00354636	Dlg1/Dpp10/Ptpn9/Dpp6	4	8	glut_neurons	Homer1+
GO:1903076	regulation of protein localization to plasma membrane	5/129	117/28564	1.943241346781461e-4	0.00466152	0.00354636	Dlg1/Dpp10/Pid1/Ptpn9/Dpp6	5	8	glut_neurons	Homer1+
GO:0043409	negative regulation of MAPK cascade	6/129	187/28564	2.121991147374482e-4	0.00497462	0.00378456	Spred2/Prkca/Dlg1/Dmd/Ptprr/Spred1	6	8	glut_neurons	Homer1+
GO:0050770	regulation of axonogenesis	6/129	187/28564	2.121991147374482e-4	0.00497462	0.00378456	Dab1/Pak3/Ntrk2/Epha7/Sema3e/Bcl11a	6	8	glut_neurons	Homer1+
GO:0010829	negative regulation of glucose transmembrane transport	3/129	26/28564	0.000216836	0.00502621	0.0038238	Prkca/Pid1/Prkcb	3	8	glut_neurons	Homer1+
GO:0006816	calcium ion transport	9/129	452/28564	2.2075097429962717e-4	0.0050601	0.00384959	Homer1/Cacnb2/Plcb1/Cacng3/Dmd/Pde4b/Htr2a/Mcu/Prkcb	9	8	glut_neurons	Homer1+
GO:0007015	actin filament organization	9/129	454/28564	2.2805599806492472e-4	0.0051701	0.00393327	Pak3/Elmo1/Phactr1/Sorbs2/Dlg1/Fam171a1/Pcdh15/Fhod3/Mcu	9	8	glut_neurons	Homer1+
GO:1903522	regulation of blood circulation	7/129	270/28564	2.3384506897896964e-4	0.00524372	0.00398928	Cacnb2/Prkca/Thrb/Dlg1/Dmd/Pde4b/Htr2a	7	8	glut_neurons	Homer1+
GO:0048813	dendrite morphogenesis	6/129	192/28564	2.4460912496419683e-4	0.00542531	0.00412742	Pak3/Phactr1/Dclk1/Lrrk2/Hecw1/Ctnnd2	6	8	glut_neurons	Homer1+
GO:0031346	positive regulation of cell projection organization	9/129	459/28564	2.4720254501282076e-4	0.00542531	0.00412742	Pak3/Ntrk2/Lrrc7/Dmd/Magi2/Zfp804a/Bcl11a/Dcc/Neurl1a	9	8	glut_neurons	Homer1+
GO:0021537	telencephalon development	7/129	274/28564	2.5567680490549104e-4	0.00549439	0.00417998	Dab1/Phactr1/Ntrk2/Plcb1/Nfib/Lrrk2/Nrg3	7	8	glut_neurons	Homer1+
GO:0043270	positive regulation of monoatomic ion transport	7/129	274/28564	2.5567680490549104e-4	0.00549439	0.00417998	Homer1/Cacnb2/Plcb1/Cacng3/Dlg1/Dmd/Dpp6	7	8	glut_neurons	Homer1+
GO:0050905	neuromuscular process	6/129	197/28564	2.8079473965277144e-4	0.00597195	0.0045433	Homer1/Kcnh1/Dmd/Kcnma1/Rbfox1/Pcdh15	6	8	glut_neurons	Homer1+
GO:0050771	negative regulation of axonogenesis	4/129	70/28564	2.890436101691858e-4	0.00608466	0.00462904	Dab1/Epha7/Sema3e/Bcl11a	4	8	glut_neurons	Homer1+
GO:1902473	regulation of protein localization to synapse	3/129	29/28564	3.0173734116751286e-4	0.00617355	0.00469667	Dlg1/Magi2/Gpc6	3	8	glut_neurons	Homer1+
GO:0008016	regulation of heart contraction	6/129	200/28564	3.044438948348112e-4	0.00617355	0.00469667	Cacnb2/Prkca/Thrb/Dlg1/Dmd/Pde4b	6	8	glut_neurons	Homer1+
GO:0043113	receptor clustering	4/129	71/28564	3.052360695698446e-4	0.00617355	0.00469667	Lrrtm4/Dlg2/Sorbs2/Magi2	4	8	glut_neurons	Homer1+
GO:1904377	positive regulation of protein localization to cell periphery	4/129	71/28564	3.052360695698446e-4	0.00617355	0.00469667	Dlg1/Dpp10/Ptpn9/Dpp6	4	8	glut_neurons	Homer1+
GO:0015012	heparan sulfate proteoglycan biosynthetic process	3/129	30/28564	3.341600682929654e-4	0.0066483	0.00505784	Hs6st3/Ndst3/Ndst4	3	8	glut_neurons	Homer1+
GO:0051962	positive regulation of nervous system development	8/129	379/28564	3.3730231400435853e-4	0.0066483	0.00505784	Lingo2/Lrrtm4/Pak3/Prkca/Ntrk2/Atxn1/Bcl11a/Neurl1a	8	8	glut_neurons	Homer1+
GO:0031644	regulation of nervous system process	6/129	204/28564	3.3837678607374276e-4	0.0066483	0.00505784	Homer1/Dlgap2/Dlgap1/Lrrk2/Rims1/Pclo	6	8	glut_neurons	Homer1+
GO:0009101	glycoprotein biosynthetic process	7/129	290/28564	3.600122265646579e-4	0.00698587	0.00531466	Hs6st3/Tmtc2/Plcb1/Galnt18/Chsy3/Ndst3/Ndst4	7	8	glut_neurons	Homer1+
GO:0060996	dendritic spine development	5/129	134/28564	3.642838284722431e-4	0.00698587	0.00531466	Pak3/Lrrk2/Asap1/Ctnnd2/Neurl1a	5	8	glut_neurons	Homer1+
GO:0071805	potassium ion transmembrane transport	6/129	207/28564	3.657170380138059e-4	0.00698587	0.00531466	Kcnh1/Dlg1/Dpp10/Kcnma1/Kcnh5/Dpp6	6	8	glut_neurons	Homer1+
GO:0043523	regulation of neuron apoptotic process	7/129	294/28564	3.908020975995741e-4	0.00739656	0.0056271	Pak3/Oxr1/Ntrk2/Epha7/Kcnma1/Sema3e/Ppp2r2b	7	8	glut_neurons	Homer1+
GO:0098742	cell-cell adhesion via plasma-membrane adhesion molecules	6/129	211/28564	4.048271243389532e-4	0.00759235	0.00577605	Unc5d/Dab1/Alcam/Magi2/Pcdh15/Cdh18	6	8	glut_neurons	Homer1+
GO:0021952	central nervous system projection neuron axonogenesis	3/129	33/28564	4.44640072191941e-4	0.00805795	0.00613027	Nfib/Dclk1/Dcc	3	8	glut_neurons	Homer1+
GO:0099637	neurotransmitter receptor transport	3/129	33/28564	4.44640072191941e-4	0.00805795	0.00613027	Cacng3/Mapk10/Lrrc7	3	8	glut_neurons	Homer1+
GO:1903429	regulation of cell maturation	3/129	33/28564	4.44640072191941e-4	0.00805795	0.00613027	Lrrk2/Grb14/Bcl11a	3	8	glut_neurons	Homer1+
GO:0051963	regulation of synapse assembly	5/129	140/28564	4.452769363241426e-4	0.00805795	0.00613027	Lingo2/Lrrtm4/Prkca/Ntrk2/Epha7	5	8	glut_neurons	Homer1+
GO:0008286	insulin receptor signaling pathway	5/129	141/28564	4.5999509717216446e-4	0.00825191	0.00627783	Prkca/Plcb1/Grb14/Pid1/Prkcb	5	8	glut_neurons	Homer1+
GO:0051965	positive regulation of synapse assembly	4/129	80/28564	4.815406430775866e-4	0.00856395	0.00651522	Lingo2/Lrrtm4/Prkca/Ntrk2	4	8	glut_neurons	Homer1+
GO:0031345	negative regulation of cell projection organization	6/129	219/28564	4.928112773567436e-4	0.00868948	0.00661072	Dab1/Lrrk2/Epha7/Ptpn9/Sema3e/Bcl11a	6	8	glut_neurons	Homer1+
GO:0032535	regulation of cellular component size	8/129	404/28564	5.144699330325623e-4	0.0089945	0.00684277	Pak3/Dlg1/Epha7/Kcnma1/Fhod3/Pclo/Sema3e/Bcl11a	8	8	glut_neurons	Homer1+
GO:0010038	response to metal ion	7/129	309/28564	5.255606579035346e-4	0.00911119	0.00693154	Homer1/Kcnh1/Dlg2/Pam/Lrrk2/Kcnma1/Pcdh15	7	8	glut_neurons	Homer1+
GO:0048469	cell maturation	6/129	227/28564	5.950273621698255e-4	0.010229512067969584	0.00778233	Dlg2/Plcb1/Lrrk2/Grb14/Kcnma1/Bcl11a	6	8	glut_neurons	Homer1+
GO:0046626	regulation of insulin receptor signaling pathway	4/129	86/28564	6.332182367038374e-4	0.010796109275372036	0.00821338	Prkca/Grb14/Pid1/Prkcb	4	8	glut_neurons	Homer1+
GO:2001257	regulation of cation channel activity	5/129	152/28564	6.471890968024563e-4	0.0109439	0.00832579	Homer1/Cacnb2/Dlg1/Dmd/Pde4b	5	8	glut_neurons	Homer1+
GO:0043525	positive regulation of neuron apoptotic process	4/129	88/28564	6.905294845737606e-4	0.011581807533948522	0.00881112	Pak3/Epha7/Kcnma1/Ppp2r2b	4	8	glut_neurons	Homer1+
GO:0018105	peptidyl-serine phosphorylation	7/129	326/28564	7.205401548498407e-4	0.011987696285929205	0.00911991	Prkca/Ntrk2/Dclk1/Lrrk2/Mast4/Dmd/Prkcb	7	8	glut_neurons	Homer1+
GO:0099170	postsynaptic modulation of chemical synaptic transmission	3/129	39/28564	7.302172841784009e-4	0.012051506058080329	0.00916845	Sorcs3/Plcb1/Dcc	3	8	glut_neurons	Homer1+
GO:1900076	regulation of cellular response to insulin stimulus	4/129	90/28564	7.514194220799386e-4	0.012303	0.00935979	Prkca/Grb14/Pid1/Prkcb	4	8	glut_neurons	Homer1+
GO:1990089	response to nerve growth factor	3/129	40/28564	7.868306141944493e-4	0.0126815	0.00964773	Ntrk2/Dlg1/Magi2	3	8	glut_neurons	Homer1+
GO:1990090	cellular response to nerve growth factor stimulus	3/129	40/28564	7.868306141944493e-4	0.0126815	0.00964773	Ntrk2/Dlg1/Magi2	3	8	glut_neurons	Homer1+
GO:0060047	heart contraction	6/129	242/28564	8.303969923035337e-4	0.013177761500939923	0.010025278668215131	Cacnb2/Prkca/Thrb/Dlg1/Dmd/Pde4b	6	8	glut_neurons	Homer1+
GO:1901888	regulation of cell junction assembly	6/129	242/28564	8.303969923035337e-4	0.013177761500939923	0.010025278668215131	Lingo2/Lrrtm4/Prkca/Ntrk2/Peak1/Epha7	6	8	glut_neurons	Homer1+
GO:0006029	proteoglycan metabolic process	4/129	94/28564	8.844238670301935e-4	0.013682671592026166	0.010409400384575867	Hs6st3/Chsy3/Ndst3/Ndst4	4	8	glut_neurons	Homer1+
GO:0007207	phospholipase C-activating G protein-coupled acetylcholine receptor signaling pathway	2/129	10/28564	8.89380265443284e-4	0.013682671592026166	0.010409400384575867	Plcb1/Prkcb	2	8	glut_neurons	Homer1+
GO:0048671	negative regulation of collateral sprouting	2/129	10/28564	8.89380265443284e-4	0.013682671592026166	0.010409400384575867	Epha7/Bcl11a	2	8	glut_neurons	Homer1+
GO:1902746	regulation of lens fiber cell differentiation	2/129	10/28564	8.89380265443284e-4	0.013682671592026166	0.010409400384575867	Spred2/Spred1	2	8	glut_neurons	Homer1+
GO:0033674	positive regulation of kinase activity	8/129	440/28564	8.953759888141214e-4	0.013682671592026166	0.010409400384575867	Dab1/Ntrk2/Dlg1/Lrrk2/Kitl/Htr2a/Neurl1a/Ghr	8	8	glut_neurons	Homer1+
GO:0070588	calcium ion transmembrane transport	7/129	339/28564	9.051654757959309e-4	0.013730561592404452	0.010445833780276569	Cacnb2/Plcb1/Cacng3/Dmd/Pde4b/Htr2a/Mcu	7	8	glut_neurons	Homer1+
GO:0060079	excitatory postsynaptic potential	4/129	95/28564	9.201026325842084e-4	0.013855268109643958	0.010540707070173298	Atxn1/Lrrk2/Rims1/Pclo	4	8	glut_neurons	Homer1+
GO:0001763	morphogenesis of a branching structure	6/129	249/28564	9.621907971290495e-4	0.014384055177371225	0.010942993733939076	Dlg1/Lrrk2/Epha7/Sema3e/Bcl11a/Ctnnd2	6	8	glut_neurons	Homer1+
GO:0018209	peptidyl-serine modification	7/129	345/28564	0.00100207	0.0148725	0.011314587805331759	Prkca/Ntrk2/Dclk1/Lrrk2/Mast4/Dmd/Prkcb	7	8	glut_neurons	Homer1+
GO:0006937	regulation of muscle contraction	5/129	168/28564	0.00101452	0.014949685291408875	0.011373309574452447	Prkca/Dlg1/Dmd/Pde4b/Kcnma1	5	8	glut_neurons	Homer1+
GO:0003015	heart process	6/129	255/28564	0.00108749	0.0159112	0.012104819941510993	Cacnb2/Prkca/Thrb/Dlg1/Dmd/Pde4b	6	8	glut_neurons	Homer1+
GO:0048015	phosphatidylinositol-mediated signaling	5/129	171/28564	0.00109773	0.0159481	0.012132850959421966	Kcnh1/Ntrk2/Plcb1/Htr2a/Sema3e	5	8	glut_neurons	Homer1+
GO:0019226	transmission of nerve impulse	4/129	101/28564	0.00115575	0.016560637243285437	0.012598877531310344	Ntrk2/Cacng3/Kcnma1/Dpp6	4	8	glut_neurons	Homer1+
GO:0006941	striated muscle contraction	5/129	173/28564	0.00115595	0.016560637243285437	0.012598877531310344	Homer1/Cacnb2/Dlg1/Dmd/Pde4b	5	8	glut_neurons	Homer1+
GO:0002028	regulation of sodium ion transport	4/129	103/28564	0.00124288	0.017683165289480218	0.013452866008426666	Plcb1/Hecw1/Dmd/Nkain2	4	8	glut_neurons	Homer1+
GO:0095500	acetylcholine receptor signaling pathway	3/129	47/28564	0.00126196	0.017710359058999616	0.013473554280668636	Plcb1/Sorbs2/Prkcb	3	8	glut_neurons	Homer1+
GO:1901385	regulation of voltage-gated calcium channel activity	3/129	47/28564	0.00126196	0.017710359058999616	0.013473554280668636	Cacnb2/Dmd/Pde4b	3	8	glut_neurons	Homer1+
GO:0040013	negative regulation of locomotion	7/129	360/28564	0.00128031	0.017834292748764104	0.013567839624668867	Nav3/Plcb1/Nrg3/Magi2/Ptprr/Sema3e/Spred1	7	8	glut_neurons	Homer1+
GO:0014832	urinary bladder smooth muscle contraction	2/129	12/28564	0.00129673	0.017834292748764104	0.013567839624668867	Kcnma1/Htr2a	2	8	glut_neurons	Homer1+
GO:0061669	spontaneous neurotransmitter secretion	2/129	12/28564	0.00129673	0.017834292748764104	0.013567839624668867	Rph3a/Rims1	2	8	glut_neurons	Homer1+
GO:0009100	glycoprotein metabolic process	7/129	362/28564	0.00132157	0.018055592444582533	0.013736198349298444	Hs6st3/Tmtc2/Plcb1/Galnt18/Chsy3/Ndst3/Ndst4	7	8	glut_neurons	Homer1+
GO:0001941	postsynaptic membrane organization	3/129	48/28564	0.00134168	0.018209709935121235	0.013853446699117667	Lrrtm4/Sorbs2/Magi2	3	8	glut_neurons	Homer1+
GO:0018198	peptidyl-cysteine modification	3/129	49/28564	0.00142449	0.019082603462594057	0.014517520097317518	Oxr1/Zdhhc14/Dmd	3	8	glut_neurons	Homer1+
GO:1905145	cellular response to acetylcholine	3/129	49/28564	0.00142449	0.019082603462594057	0.014517520097317518	Plcb1/Sorbs2/Prkcb	3	8	glut_neurons	Homer1+
GO:0050730	regulation of peptidyl-tyrosine phosphorylation	6/129	270/28564	0.00145563	0.019374006666767467	0.014739211643824928	Prkca/Kitl/Epha7/Htr2a/Neurl1a/Ghr	6	8	glut_neurons	Homer1+
GO:0048009	insulin-like growth factor receptor signaling pathway	3/129	50/28564	0.00151045	0.0199747	0.015196181723905971	Plcb1/Atxn1/Ghr	3	8	glut_neurons	Homer1+
GO:1903430	negative regulation of cell maturation	2/129	13/28564	0.00152797	0.020077671511950754	0.015274540512956895	Grb14/Bcl11a	2	8	glut_neurons	Homer1+
GO:0050767	regulation of neurogenesis	8/129	480/28564	0.00155531	0.020307688533065672	0.015449531139016209	Dab1/Pak3/Ntrk2/Atxn1/Epha7/Sema3e/Bcl11a/Neurl1a	8	8	glut_neurons	Homer1+
GO:0045860	positive regulation of protein kinase activity	7/129	373/28564	0.00156745	0.020337464641571254	0.0154722	Dab1/Dlg1/Lrrk2/Kitl/Htr2a/Neurl1a/Ghr	7	8	glut_neurons	Homer1+
GO:1905477	positive regulation of protein localization to membrane	4/129	111/28564	0.00163759	0.021114649671802554	0.016063444988472383	Dlg1/Dpp10/Ptpn9/Dpp6	4	8	glut_neurons	Homer1+
GO:0022604	regulation of cell morphogenesis	6/129	278/28564	0.00168727	0.021546358251345783	0.016391877007299823	Pak3/Dlg1/Rims1/Fam171a1/Sema3e/Bcl11a	6	8	glut_neurons	Homer1+
GO:1905144	response to acetylcholine	3/129	52/28564	0.00169196	0.021546358251345783	0.016391877007299823	Plcb1/Sorbs2/Prkcb	3	8	glut_neurons	Homer1+
GO:0007612	learning	5/129	190/28564	0.00174738	0.022115580319439578	0.016824925507709476	Meis2/Sorcs3/Ntrk2/Atxn1/Ctnnd2	5	8	glut_neurons	Homer1+
GO:0021700	developmental maturation	7/129	381/28564	0.00176766	0.022222426129419607	0.016906210862547965	Dlg2/Plcb1/Lrrk2/Grb14/Kcnma1/Bcl11a/Neurl1a	7	8	glut_neurons	Homer1+
GO:1901841	regulation of high voltage-gated calcium channel activity	2/129	14/28564	0.00177736	0.022222426129419607	0.016906210862547965	Cacnb2/Pde4b	2	8	glut_neurons	Homer1+
GO:0018107	peptidyl-threonine phosphorylation	4/129	115/28564	0.00186435	0.023169580896080993	0.0176268	Spred2/Prkca/Lrrk2/Spred1	4	8	glut_neurons	Homer1+
GO:0014904	myotube cell development	3/129	54/28564	0.00188655	0.0233051	0.017729899334918614	Homer1/Lncpint/Dmd	3	8	glut_neurons	Homer1+
GO:0043266	regulation of potassium ion transport	4/129	116/28564	0.00192426	0.023351517330017686	0.0177652	Dlg1/Dpp10/Htr2a/Dpp6	4	8	glut_neurons	Homer1+
GO:0044272	sulfur compound biosynthetic process	4/129	116/28564	0.00192426	0.023351517330017686	0.0177652	Hs6st3/Chsy3/Ndst3/Ndst4	4	8	glut_neurons	Homer1+
GO:0099565	chemical synaptic transmission, postsynaptic	4/129	116/28564	0.00192426	0.023351517330017686	0.0177652	Atxn1/Lrrk2/Rims1/Pclo	4	8	glut_neurons	Homer1+
GO:0048588	developmental cell growth	6/129	287/28564	0.00198024	0.0237624	0.018077790648411037	Sorbs2/Dclk1/Epha7/Rims1/Sema3e/Bcl11a	6	8	glut_neurons	Homer1+
GO:0045666	positive regulation of neuron differentiation	4/129	117/28564	0.0019855	0.0237624	0.018077790648411037	Dab1/Rgs6/Brinp3/Dmd	4	8	glut_neurons	Homer1+
GO:0014848	urinary tract smooth muscle contraction	2/129	15/28564	0.00204475	0.0237624	0.018077790648411037	Kcnma1/Htr2a	2	8	glut_neurons	Homer1+
GO:0018119	peptidyl-cysteine S-nitrosylation	2/129	15/28564	0.00204475	0.0237624	0.018077790648411037	Oxr1/Dmd	2	8	glut_neurons	Homer1+
GO:0043517	positive regulation of DNA damage response, signal transduction by p53 class mediator	2/129	15/28564	0.00204475	0.0237624	0.018077790648411037	Spred2/Spred1	2	8	glut_neurons	Homer1+
GO:1902075	cellular response to salt	5/129	197/28564	0.0020461	0.0237624	0.018077790648411037	Kcnh1/Dlg2/Plcb1/Sorbs2/Prkcb	5	8	glut_neurons	Homer1+
GO:0021987	cerebral cortex development	4/129	118/28564	0.00204807	0.0237624	0.018077790648411037	Dab1/Phactr1/Ntrk2/Plcb1	4	8	glut_neurons	Homer1+
GO:0071375	cellular response to peptide hormone stimulus	6/129	289/28564	0.00205027	0.0237624	0.018077790648411037	Prkca/Plcb1/Grb14/Pid1/Prkcb/Ghr	6	8	glut_neurons	Homer1+
GO:0002062	chondrocyte differentiation	4/129	120/28564	0.00217728	0.025093494393481037	0.0190904	Prkca/Thrb/Nfib/Sox5	4	8	glut_neurons	Homer1+
GO:2001222	regulation of neuron migration	3/129	57/28564	0.00220368	0.0252566	0.0192145	Unc5d/Phactr1/Nrg3	3	8	glut_neurons	Homer1+
GO:0019932	second-messenger-mediated signaling	6/129	295/28564	0.00227163	0.0258916	0.019697625933081005	Pde10a/Ntrk2/Lrrk2/Dmd/Mcu/Cap2	6	8	glut_neurons	Homer1+
GO:0007528	neuromuscular junction development	3/129	58/28564	0.00231627	0.025982213559818317	0.0197666	Cacnb2/Sorbs2/Lrrk2	3	8	glut_neurons	Homer1+
GO:0043687	post-translational protein modification	3/129	58/28564	0.00231627	0.025982213559818317	0.0197666	Prkca/Agbl4/Prkcb	3	8	glut_neurons	Homer1+
GO:0017014	protein nitrosylation	2/129	16/28564	0.00232996	0.025982213559818317	0.0197666	Oxr1/Dmd	2	8	glut_neurons	Homer1+
GO:1902950	regulation of dendritic spine maintenance	2/129	16/28564	0.00232996	0.025982213559818317	0.0197666	Homer1/Zfp804a	2	8	glut_neurons	Homer1+
GO:0018210	peptidyl-threonine modification	4/129	124/28564	0.00245238	0.027172073258162933	0.020671766322892533	Spred2/Prkca/Lrrk2/Spred1	4	8	glut_neurons	Homer1+
GO:0034767	positive regulation of monoatomic ion transmembrane transport	5/129	206/28564	0.00248297	0.027172073258162933	0.020671766322892533	Cacnb2/Plcb1/Cacng3/Dmd/Dpp6	5	8	glut_neurons	Homer1+
GO:0042326	negative regulation of phosphorylation	7/129	405/28564	0.00248935	0.027172073258162933	0.020671766322892533	Spred2/Prkca/Atxn1/Lrrk2/Dmd/Pid1/Spred1	7	8	glut_neurons	Homer1+
GO:0048638	regulation of developmental growth	7/129	405/28564	0.00248935	0.027172073258162933	0.020671766322892533	Plcb1/Dlg1/Epha7/Rims1/Sema3e/Bcl11a/Ghr	7	8	glut_neurons	Homer1+
GO:2000649	regulation of sodium ion transmembrane transporter activity	3/129	60/28564	0.00255201	0.027709482655049054	0.021080612617638154	Plcb1/Hecw1/Dmd	3	8	glut_neurons	Homer1+
GO:0050855	regulation of B cell receptor signaling pathway	2/129	17/28564	0.00263283	0.028142664221014933	0.021410165244040748	Plcl2/Prkcb	2	8	glut_neurons	Homer1+
GO:1903423	positive regulation of synaptic vesicle recycling	2/129	17/28564	0.00263283	0.028142664221014933	0.021410165244040748	Lrrk2/Pclo	2	8	glut_neurons	Homer1+
GO:2000651	positive regulation of sodium ion transmembrane transporter activity	2/129	17/28564	0.00263283	0.028142664221014933	0.021410165244040748	Plcb1/Dmd	2	8	glut_neurons	Homer1+
GO:1901890	positive regulation of cell junction assembly	4/129	127/28564	0.00267375	0.028208919258045143	0.0214606	Lingo2/Lrrtm4/Prkca/Ntrk2	4	8	glut_neurons	Homer1+
GO:0099171	presynaptic modulation of chemical synaptic transmission	3/129	61/28564	0.00267523	0.028208919258045143	0.0214606	Prkca/Htr2a/Prkcb	3	8	glut_neurons	Homer1+
GO:0071695	anatomical structure maturation	6/129	305/28564	0.00268005	0.028208919258045143	0.0214606	Dlg2/Plcb1/Lrrk2/Grb14/Kcnma1/Bcl11a	6	8	glut_neurons	Homer1+
GO:0086001	cardiac muscle cell action potential	3/129	62/28564	0.00280207	0.0291953	0.022211	Cacnb2/Dlg1/Dmd	3	8	glut_neurons	Homer1+
GO:0090311	regulation of protein deacetylation	3/129	62/28564	0.00280207	0.0291953	0.022211	Spred2/Lrrk2/Spred1	3	8	glut_neurons	Homer1+
GO:0098815	modulation of excitatory postsynaptic potential	3/129	63/28564	0.00293255	0.0303107	0.023059570987471373	Lrrk2/Rims1/Pclo	3	8	glut_neurons	Homer1+
GO:0014041	regulation of neuron maturation	2/129	18/28564	0.0029532	0.0303107	0.023059570987471373	Lrrk2/Bcl11a	2	8	glut_neurons	Homer1+
GO:0098814	spontaneous synaptic transmission	2/129	18/28564	0.0029532	0.0303107	0.023059570987471373	Rph3a/Rims1	2	8	glut_neurons	Homer1+
GO:0060048	cardiac muscle contraction	4/129	131/28564	0.00298972	0.030458599833525148	0.023172065388568513	Cacnb2/Dlg1/Dmd/Pde4b	4	8	glut_neurons	Homer1+
GO:0030336	negative regulation of cell migration	6/129	312/28564	0.00299714	0.030458599833525148	0.023172065388568513	Nav3/Plcb1/Nrg3/Magi2/Ptprr/Spred1	6	8	glut_neurons	Homer1+
GO:0032414	positive regulation of ion transmembrane transporter activity	4/129	132/28564	0.00307253	0.0307701	0.023409010966752578	Cacnb2/Plcb1/Cacng3/Dmd	4	8	glut_neurons	Homer1+
GO:0043406	positive regulation of MAP kinase activity	4/129	132/28564	0.00307253	0.0307701	0.023409010966752578	Lrrk2/Kitl/Htr2a/Ghr	4	8	glut_neurons	Homer1+
GO:0060078	regulation of postsynaptic membrane potential	4/129	132/28564	0.00307253	0.0307701	0.023409010966752578	Atxn1/Lrrk2/Rims1/Pclo	4	8	glut_neurons	Homer1+
GO:0098926	postsynaptic signal transduction	3/129	65/28564	0.0032046	0.0319376	0.024297245253485537	Plcb1/Sorbs2/Prkcb	3	8	glut_neurons	Homer1+
GO:0010721	negative regulation of cell development	6/129	318/28564	0.00329059	0.032034423829976635	0.0243709	Inpp4b/Dab1/Epha7/Grb14/Sema3e/Bcl11a	6	8	glut_neurons	Homer1+
GO:0001654	eye development	7/129	426/28564	0.00329062	0.032034423829976635	0.0243709	Meis2/Spred2/Thrb/Ntrk2/Nfib/Dlg1/Spred1	7	8	glut_neurons	Homer1+
GO:0098696	regulation of neurotransmitter receptor localization to postsynaptic specialization membrane	2/129	19/28564	0.00329091	0.032034423829976635	0.0243709	Magi2/Gpc6	2	8	glut_neurons	Homer1+
GO:0106070	regulation of adenylate cyclase-activating G protein-coupled receptor signaling pathway	2/129	19/28564	0.00329091	0.032034423829976635	0.0243709	Pde10a/Pde4b	2	8	glut_neurons	Homer1+
GO:0048639	positive regulation of developmental growth	5/129	220/28564	0.00329195	0.032034423829976635	0.0243709	Plcb1/Dlg1/Rims1/Bcl11a/Ghr	5	8	glut_neurons	Homer1+
GO:0032869	cellular response to insulin stimulus	5/129	221/28564	0.00335619	0.0325062	0.024729806775655023	Prkca/Plcb1/Grb14/Pid1/Prkcb	5	8	glut_neurons	Homer1+
GO:0150063	visual system development	7/129	429/28564	0.00341951	0.0329647	0.025078669409092008	Meis2/Spred2/Thrb/Ntrk2/Nfib/Dlg1/Spred1	7	8	glut_neurons	Homer1+
GO:0008277	regulation of G protein-coupled receptor signaling pathway	4/129	137/28564	0.00351014	0.0335251	0.025504957509257853	Pde10a/Plcb1/Rgs6/Pde4b	4	8	glut_neurons	Homer1+
GO:0051592	response to calcium ion	4/129	137/28564	0.00351014	0.0335251	0.025504957509257853	Homer1/Kcnh1/Kcnma1/Pcdh15	4	8	glut_neurons	Homer1+
GO:0048880	sensory system development	7/129	433/28564	0.00359733	0.0340066	0.025871296055390437	Meis2/Spred2/Thrb/Ntrk2/Nfib/Dlg1/Spred1	7	8	glut_neurons	Homer1+
GO:0010801	negative regulation of peptidyl-threonine phosphorylation	2/129	20/28564	0.00364579	0.0340066	0.025871296055390437	Spred2/Spred1	2	8	glut_neurons	Homer1+
GO:0035641	locomotory exploration behavior	2/129	20/28564	0.00364579	0.0340066	0.025871296055390437	Lsamp/Lrrk2	2	8	glut_neurons	Homer1+
GO:0048148	behavioral response to cocaine	2/129	20/28564	0.00364579	0.0340066	0.025871296055390437	Homer1/Htr2a	2	8	glut_neurons	Homer1+
GO:0097091	synaptic vesicle clustering	2/129	20/28564	0.00364579	0.0340066	0.025871296055390437	Magi2/Pclo	2	8	glut_neurons	Homer1+
GO:2000146	negative regulation of cell motility	6/129	325/28564	0.00365946	0.0340066	0.025871296055390437	Nav3/Plcb1/Nrg3/Magi2/Ptprr/Spred1	6	8	glut_neurons	Homer1+
GO:0018108	peptidyl-tyrosine phosphorylation	6/129	326/28564	0.00371457	0.0343639	0.0261431	Prkca/Kitl/Epha7/Htr2a/Neurl1a/Ghr	6	8	glut_neurons	Homer1+
GO:0032411	positive regulation of transporter activity	4/129	140/28564	0.00379207	0.034786	0.0264642	Cacnb2/Plcb1/Cacng3/Dmd	4	8	glut_neurons	Homer1+
GO:0022029	telencephalon cell migration	3/129	69/28564	0.00379392	0.034786	0.0264642	Dab1/Lrrk2/Nrg3	3	8	glut_neurons	Homer1+
GO:0018212	peptidyl-tyrosine modification	6/129	328/28564	0.00382662	0.0349306	0.026574266902497264	Prkca/Kitl/Epha7/Htr2a/Neurl1a/Ghr	6	8	glut_neurons	Homer1+
GO:0007213	G protein-coupled acetylcholine receptor signaling pathway	2/129	21/28564	0.00401769	0.036353	0.0276564	Plcb1/Prkcb	2	8	glut_neurons	Homer1+
GO:0046325	negative regulation of glucose import	2/129	21/28564	0.00401769	0.036353	0.0276564	Prkca/Pid1	2	8	glut_neurons	Homer1+
GO:0050885	neuromuscular process controlling balance	3/129	71/28564	0.00411169	0.0367204	0.0279359	Kcnma1/Rbfox1/Pcdh15	3	8	glut_neurons	Homer1+
GO:0055117	regulation of cardiac muscle contraction	3/129	71/28564	0.00411169	0.0367204	0.0279359	Dlg1/Dmd/Pde4b	3	8	glut_neurons	Homer1+
GO:0086003	cardiac muscle cell contraction	3/129	71/28564	0.00411169	0.0367204	0.0279359	Cacnb2/Dlg1/Pde4b	3	8	glut_neurons	Homer1+
GO:1901653	cellular response to peptide	6/129	334/28564	0.00417788	0.037150701146224596	0.028263232088690905	Prkca/Plcb1/Grb14/Pid1/Prkcb/Ghr	6	8	glut_neurons	Homer1+
GO:0021885	forebrain cell migration	3/129	72/28564	0.00427645	0.037382737944524465	0.028439759305705015	Dab1/Lrrk2/Nrg3	3	8	glut_neurons	Homer1+
GO:0071868	cellular response to monoamine stimulus	3/129	72/28564	0.00427645	0.037382737944524465	0.028439759305705015	Lrrk2/Pde4b/Htr2a	3	8	glut_neurons	Homer1+
GO:0071870	cellular response to catecholamine stimulus	3/129	72/28564	0.00427645	0.037382737944524465	0.028439759305705015	Lrrk2/Pde4b/Htr2a	3	8	glut_neurons	Homer1+
GO:1902305	regulation of sodium ion transmembrane transport	3/129	72/28564	0.00427645	0.037382737944524465	0.028439759305705015	Plcb1/Hecw1/Dmd	3	8	glut_neurons	Homer1+
GO:0050773	regulation of dendrite development	4/129	145/28564	0.00429542	0.0373901	0.028445323967734915	Pak3/Ntrk2/Hecw1/Bcl11a	4	8	glut_neurons	Homer1+
GO:0055001	muscle cell development	5/129	235/28564	0.00435297	0.0374094	0.028460058632171232	Homer1/Lncpint/Sorbs2/Dmd/Fhod3	5	8	glut_neurons	Homer1+
GO:0046488	phosphatidylinositol metabolic process	4/129	146/28564	0.00440123	0.0374094	0.028460058632171232	Inpp4b/Plcb1/Synj2/Htr2a	4	8	glut_neurons	Homer1+
GO:0032332	positive regulation of chondrocyte differentiation	2/129	22/28564	0.00440644	0.0374094	0.028460058632171232	Thrb/Sox5	2	8	glut_neurons	Homer1+
GO:0045475	locomotor rhythm	2/129	22/28564	0.00440644	0.0374094	0.028460058632171232	Mapk10/Kcnma1	2	8	glut_neurons	Homer1+
GO:0048532	anatomical structure arrangement	2/129	22/28564	0.00440644	0.0374094	0.028460058632171232	Dab1/Dmd	2	8	glut_neurons	Homer1+
GO:0098969	neurotransmitter receptor transport to postsynaptic membrane	2/129	22/28564	0.00440644	0.0374094	0.028460058632171232	Mapk10/Lrrc7	2	8	glut_neurons	Homer1+
GO:0016311	dephosphorylation	6/129	342/28564	0.00468266	0.039236924868560404	0.029850373742390263	Inpp4b/Synj2/Magi2/Ptprr/Ptpn9/Ppp2r2b	6	8	glut_neurons	Homer1+
GO:0017156	calcium-ion regulated exocytosis	3/129	75/28564	0.00479461	0.039236924868560404	0.029850373742390263	Rph3a/Rims1/Trim9	3	8	glut_neurons	Homer1+
GO:0071867	response to monoamine	3/129	75/28564	0.00479461	0.039236924868560404	0.029850373742390263	Lrrk2/Pde4b/Htr2a	3	8	glut_neurons	Homer1+
GO:0071869	response to catecholamine	3/129	75/28564	0.00479461	0.039236924868560404	0.029850373742390263	Lrrk2/Pde4b/Htr2a	3	8	glut_neurons	Homer1+
GO:0010738	regulation of protein kinase A signaling	2/129	23/28564	0.0048119	0.039236924868560404	0.029850373742390263	Pde10a/Lrrk2	2	8	glut_neurons	Homer1+
GO:0048670	regulation of collateral sprouting	2/129	23/28564	0.0048119	0.039236924868560404	0.029850373742390263	Epha7/Bcl11a	2	8	glut_neurons	Homer1+
GO:0071398	cellular response to fatty acid	2/129	23/28564	0.0048119	0.039236924868560404	0.029850373742390263	Plcb1/Pid1	2	8	glut_neurons	Homer1+
GO:1900120	regulation of receptor binding	2/129	23/28564	0.0048119	0.039236924868560404	0.029850373742390263	Plcl1/Plcl2	2	8	glut_neurons	Homer1+
GO:1902307	positive regulation of sodium ion transmembrane transport	2/129	23/28564	0.0048119	0.039236924868560404	0.029850373742390263	Plcb1/Dmd	2	8	glut_neurons	Homer1+
GO:1903540	establishment of protein localization to postsynaptic membrane	2/129	23/28564	0.0048119	0.039236924868560404	0.029850373742390263	Mapk10/Lrrc7	2	8	glut_neurons	Homer1+
GO:0046777	protein autophosphorylation	5/129	242/28564	0.00492337	0.0397837	0.030266339141546583	Prkca/Ntrk2/Peak1/Lrrk2/Epha7	5	8	glut_neurons	Homer1+
GO:0097529	myeloid leukocyte migration	5/129	242/28564	0.00492337	0.0397837	0.030266339141546583	Prkca/Plcb1/Kitl/Pde4b/Mcu	5	8	glut_neurons	Homer1+
GO:0034763	negative regulation of transmembrane transport	4/129	151/28564	0.00495671	0.0397837	0.030266339141546583	Prkca/Hecw1/Pid1/Prkcb	4	8	glut_neurons	Homer1+
GO:0042982	amyloid precursor protein metabolic process	3/129	76/28564	0.00497537	0.0397837	0.030266339141546583	Ntrk2/Dlg1/Slc2a13	3	8	glut_neurons	Homer1+
GO:0060997	dendritic spine morphogenesis	3/129	76/28564	0.00497537	0.0397837	0.030266339141546583	Pak3/Lrrk2/Ctnnd2	3	8	glut_neurons	Homer1+
GO:0051403	stress-activated MAPK cascade	5/129	243/28564	0.00500898	0.0398916	0.0303484	Plcb1/Mapk10/Dlg1/Lrrk2/Sh3rf1	5	8	glut_neurons	Homer1+
GO:0010563	negative regulation of phosphorus metabolic process	7/129	461/28564	0.00504687	0.0398916	0.0303484	Spred2/Prkca/Atxn1/Lrrk2/Dmd/Pid1/Spred1	7	8	glut_neurons	Homer1+
GO:0045936	negative regulation of phosphate metabolic process	7/129	461/28564	0.00504687	0.0398916	0.0303484	Spred2/Prkca/Atxn1/Lrrk2/Dmd/Pid1/Spred1	7	8	glut_neurons	Homer1+
GO:0008090	retrograde axonal transport	2/129	24/28564	0.00523389	0.041055225153273235	0.0312337	Dlg2/Agbl4	2	8	glut_neurons	Homer1+
GO:0098877	neurotransmitter receptor transport to plasma membrane	2/129	24/28564	0.00523389	0.041055225153273235	0.0312337	Mapk10/Lrrc7	2	8	glut_neurons	Homer1+
GO:0001933	negative regulation of protein phosphorylation	6/129	354/28564	0.00552228	0.0431533	0.0328298	Spred2/Prkca/Lrrk2/Dmd/Pid1/Spred1	6	8	glut_neurons	Homer1+
GO:0031098	stress-activated protein kinase signaling cascade	5/129	255/28564	0.0061203	0.047518	0.036150414594348514	Plcb1/Mapk10/Dlg1/Lrrk2/Sh3rf1	5	8	glut_neurons	Homer1+
GO:0046856	phosphatidylinositol dephosphorylation	2/129	26/28564	0.0061269	0.047518	0.036150414594348514	Inpp4b/Synj2	2	8	glut_neurons	Homer1+
GO:0035418	protein localization to synapse	10/129	100/28564	3.040675922228331e-11	6.272914427557047e-8	4.772260842149938e-8	Homer1/Dlgap1/Dlg2/Cacng3/Mapk10/Dlg1/Lrrc7/Magi2/Pclo/Gpc6	10	0	glut_neurons	Homer1+
GO:1902414	protein localization to cell junction	10/129	133/28564	5.229388041326033e-10	5.394113764627803e-7	4.1036934576932185e-7	Homer1/Dlgap1/Dlg2/Cacng3/Mapk10/Dlg1/Lrrc7/Magi2/Pclo/Gpc6	10	0	glut_neurons	Homer1+
GO:1990778	protein localization to cell periphery	14/129	389/28564	2.8280141172333937e-9	1.9447310412841635e-6	1.479497911857891e-6	Lin7a/Cacnb2/Dlg2/Cacng3/Mapk10/Dlg1/Dpp10/Lrrc7/Pid1/Magi2/Gpr158/Ptpn9/Gpc6/Dpp6	14	0	glut_neurons	Homer1+
GO:0007269	neurotransmitter secretion	10/129	169/28564	5.397142843957603e-9	2.2268611374169073e-6	1.6941347327033234e-6	Lin7a/Kcnh1/Prkca/Ntrk2/Rph3a/Lrrk2/Rims1/Trim9/Pclo/Prkcb	10	0	glut_neurons	Homer1+
GO:0099643	signal release from synapse	10/129	169/28564	5.397142843957603e-9	2.2268611374169073e-6	1.6941347327033234e-6	Lin7a/Kcnh1/Prkca/Ntrk2/Rph3a/Lrrk2/Rims1/Trim9/Pclo/Prkcb	10	0	glut_neurons	Homer1+
GO:0050807	regulation of synapse organization	12/129	305/28564	1.5218552016035325e-8	5.17237765731671e-6	3.935002723197803e-6	Homer1/Lingo2/Lrrtm4/Pak3/Prkca/Ntrk2/Lrrk2/Epha7/Magi2/Zfp804a/Asap1/Neurl1a	12	0	glut_neurons	Homer1+
GO:0050803	regulation of synapse structure or activity	12/129	313/28564	2.0256890336095674e-8	5.17237765731671e-6	3.935002723197803e-6	Homer1/Lingo2/Lrrtm4/Pak3/Prkca/Ntrk2/Lrrk2/Epha7/Magi2/Zfp804a/Asap1/Neurl1a	12	0	glut_neurons	Homer1+
GO:0099173	postsynapse organization	11/129	251/28564	2.0693490017487203e-8	5.17237765731671e-6	3.935002723197803e-6	Homer1/Lrrtm4/Pak3/Rph3a/Sorbs2/Lrrk2/Epha7/Magi2/Zfp804a/Asap1/Ctnnd2	11	0	glut_neurons	Homer1+
GO:1903539	protein localization to postsynaptic membrane	7/129	67/28564	2.2575402319277596e-8	5.17237765731671e-6	3.935002723197803e-6	Dlg2/Cacng3/Mapk10/Dlg1/Lrrc7/Magi2/Gpc6	7	0	glut_neurons	Homer1+
GO:0062237	protein localization to postsynapse	7/129	68/28564	2.5072116613265683e-8	5.17237765731671e-6	3.935002723197803e-6	Dlg2/Cacng3/Mapk10/Dlg1/Lrrc7/Magi2/Gpc6	7	0	glut_neurons	Homer1+
GO:0099003	vesicle-mediated transport in synapse	11/129	271/28564	4.5321664696233295e-8	8.499872206211753e-6	6.466469096850129e-6	Kcnh1/Prkca/Rph3a/Synj2/Mapk10/Lrrk2/Rims1/Magi2/Trim9/Pclo/Prkcb	11	0	glut_neurons	Homer1+
GO:0034765	regulation of monoatomic ion transmembrane transport	14/129	492/28564	5.394098935598309e-8	8.704542443567784e-6	6.622176586656922e-6	Homer1/Cacnb2/Kcnh1/Prkca/Plcb1/Cacng3/Dlg1/Dpp10/Hecw1/Dmd/Pde4b/Kcnma1/Kcnh5/Dpp6	14	0	glut_neurons	Homer1+
GO:0016079	synaptic vesicle exocytosis	8/129	115/28564	5.485169741462977e-8	8.704542443567784e-6	6.622176586656922e-6	Kcnh1/Prkca/Rph3a/Lrrk2/Rims1/Trim9/Pclo/Prkcb	8	0	glut_neurons	Homer1+
GO:0006836	neurotransmitter transport	10/129	225/28564	8.177011763804759e-8	1.2049410906235156e-5	9.166860556265335e-6	Lin7a/Kcnh1/Prkca/Ntrk2/Rph3a/Lrrk2/Rims1/Trim9/Pclo/Prkcb	10	0	glut_neurons	Homer1+
GO:0099504	synaptic vesicle cycle	10/129	231/28564	1.0454975622670169e-7	1.4379076473045706e-5	1.0939206072562262e-5	Kcnh1/Prkca/Rph3a/Synj2/Lrrk2/Rims1/Magi2/Trim9/Pclo/Prkcb	10	0	glut_neurons	Homer1+
GO:0097120	receptor localization to synapse	7/129	86/28564	1.2992292806668123e-7	1.6751937537597713e-5	1.2744413536014587e-5	Dlg2/Cacng3/Mapk10/Dlg1/Lrrc7/Magi2/Gpc6	7	0	glut_neurons	Homer1+
GO:0001505	regulation of neurotransmitter levels	10/129	242/28564	1.611325406399108e-7	1.9459307197580197e-5	1.4804105942593605e-5	Lin7a/Kcnh1/Prkca/Ntrk2/Rph3a/Lrrk2/Rims1/Trim9/Pclo/Prkcb	10	0	glut_neurons	Homer1+
GO:0099072	regulation of postsynaptic membrane neurotransmitter receptor levels	8/129	133/28564	1.6978552087079184e-7	1.9459307197580197e-5	1.4804105942593605e-5	Dlg2/Cacng3/Mapk10/Dlg1/Lrrc7/Magi2/Gpc6/Ctnnd2	8	0	glut_neurons	Homer1+
GO:0016358	dendrite development	11/129	327/28564	2.997334732996651e-7	3.254474502195838e-5	2.475914729583383e-5	Dab1/Pak3/Phactr1/Ntrk2/Dclk1/Lrrk2/Hecw1/Asap1/Bcl11a/Ctnnd2/Neurl1a	11	0	glut_neurons	Homer1+
GO:0042391	regulation of membrane potential	13/129	488/28564	3.507317492914528e-7	3.6086627822349535e-5	2.745371435728406e-5	Cacnb2/Kcnh1/Ntrk2/Atxn1/Dlg1/Lrrk2/Rims1/Dmd/Pid1/Kcnma1/Kcnh5/Pclo/Dpp6	13	0	glut_neurons	Homer1+
GO:0021954	central nervous system neuron development	7/129	100/28564	3.673384315411247e-7	3.6086627822349535e-5	2.745371435728406e-5	Prkca/Ntrk2/Nfib/Dclk1/Agbl4/Sema3e/Dcc	7	0	glut_neurons	Homer1+
GO:0001764	neuron migration	9/129	204/28564	3.963343875571759e-7	3.7165356433202446e-5	2.8274381428121974e-5	Unc5d/Dab1/Phactr1/Ntrk2/Dclk1/Sh3rf1/Nrg3/Sema3e/Dcc	9	0	glut_neurons	Homer1+
GO:0007409	axonogenesis	13/129	498/28564	4.409790648961087e-7	3.9553904820898794e-5	3.009152337574819e-5	Epha6/Unc5d/Dab1/Pak3/Prkca/Ntrk2/Nfib/Dclk1/Epha7/Alcam/Sema3e/Bcl11a/Dcc	13	0	glut_neurons	Homer1+
GO:0032412	regulation of monoatomic ion transmembrane transporter activity	10/129	290/28564	8.464962410844599e-7	7.276340605655169e-5	5.5356398923549545e-5	Homer1/Cacnb2/Prkca/Plcb1/Rph3a/Cacng3/Dlg1/Hecw1/Dmd/Pde4b	10	0	glut_neurons	Homer1+
GO:0099633	protein localization to postsynaptic specialization membrane	5/129	41/28564	1.1430240895176732e-6	9.069456525672922e-5	6.899793188141096e-5	Dlg2/Cacng3/Dlg1/Magi2/Gpc6	5	0	glut_neurons	Homer1+
GO:0099645	neurotransmitter receptor localization to postsynaptic specialization membrane	5/129	41/28564	1.1430240895176732e-6	9.069456525672922e-5	6.899793188141096e-5	Dlg2/Cacng3/Dlg1/Magi2/Gpc6	5	0	glut_neurons	Homer1+
GO:0022898	regulation of transmembrane transporter activity	10/129	303/28564	1.2578009470351061e-6	9.610530939753422e-5	7.311427727209915e-5	Homer1/Cacnb2/Prkca/Plcb1/Rph3a/Cacng3/Dlg1/Hecw1/Dmd/Pde4b	10	0	glut_neurons	Homer1+
GO:0034329	cell junction assembly	12/129	477/28564	1.8354070963612224e-6	1.341925104130975e-4	1.0208997271522224e-4	Lingo2/Lrrtm4/Prkca/Ntrk2/Dlg1/Peak1/Epha7/Nrg3/Magi2/Pclo/Cdh18/Ctnnd2	12	0	glut_neurons	Homer1+
GO:0032409	regulation of transporter activity	10/129	317/28564	1.8863707232088352e-6	1.341925104130975e-4	1.0208997271522224e-4	Homer1/Cacnb2/Prkca/Plcb1/Rph3a/Cacng3/Dlg1/Hecw1/Dmd/Pde4b	10	0	glut_neurons	Homer1+
GO:0007611	learning or memory	10/129	326/28564	2.421720377332159e-6	1.665336379478748e-4	1.266942134246403e-4	Meis2/Shc3/Prkca/Sorcs3/Ntrk2/Plcb1/Atxn1/Ptchd1/Htr2a/Ctnnd2	10	0	glut_neurons	Homer1+
GO:1905475	regulation of protein localization to membrane	8/129	205/28564	4.452662308339368e-6	2.963174949065844e-4	2.2543020379402364e-4	Sorbs2/Dlg1/Dpp10/Pid1/Magi2/Ptpn9/Gpc6/Dpp6	8	0	glut_neurons	Homer1+
GO:0010469	regulation of signaling receptor activity	7/129	149/28564	5.359067865386499e-6	3.3502293958461663e-4	2.548762420188603e-4	Homer1/Tafa1/Dlgap2/Dlgap1/Rph3a/Cacng3/Neurl1a	7	0	glut_neurons	Homer1+
GO:1904375	regulation of protein localization to cell periphery	7/129	149/28564	5.359067865386499e-6	3.3502293958461663e-4	2.548762420188603e-4	Dlg1/Dpp10/Pid1/Magi2/Ptpn9/Gpc6/Dpp6	7	0	glut_neurons	Homer1+
GO:0021953	central nervous system neuron differentiation	8/129	213/28564	5.899955191581877e-6	3.5798845765392393e-4	2.723477768002656e-4	Prkca/Ntrk2/Nfib/Dclk1/Sox5/Agbl4/Sema3e/Dcc	8	0	glut_neurons	Homer1+
GO:0050890	cognition	10/129	364/28564	6.408605397568545e-6	3.745879244463071e-4	2.849761947850314e-4	Meis2/Shc3/Prkca/Sorcs3/Ntrk2/Plcb1/Atxn1/Ptchd1/Htr2a/Ctnnd2	10	0	glut_neurons	Homer1+
GO:0007416	synapse assembly	8/129	216/28564	6.5366773049282866e-6	3.745879244463071e-4	2.849761947850314e-4	Lingo2/Lrrtm4/Prkca/Ntrk2/Epha7/Nrg3/Magi2/Pclo	8	0	glut_neurons	Homer1+
GO:2000300	regulation of synaptic vesicle exocytosis	5/129	59/28564	7.15528150526146e-6	3.9895529041498356e-4	3.035142169088147e-4	Kcnh1/Prkca/Lrrk2/Rims1/Prkcb	5	0	glut_neurons	Homer1+
GO:0046928	regulation of neurotransmitter secretion	6/129	104/28564	7.973928678812595e-6	4.291107420134473e-4	3.264556554542694e-4	Kcnh1/Prkca/Ntrk2/Lrrk2/Rims1/Prkcb	6	0	glut_neurons	Homer1+
GO:0010959	regulation of metal ion transport	11/129	460/28564	8.112127454447137e-6	4.291107420134473e-4	3.264556554542694e-4	Homer1/Cacnb2/Plcb1/Dlg1/Dpp10/Hecw1/Dmd/Pde4b/Htr2a/Dpp6/Nkain2	11	0	glut_neurons	Homer1+
GO:1903305	regulation of regulated secretory pathway	7/129	161/28564	8.909121790071057e-6	4.5765565766328815e-4	3.481718425267049e-4	Kcnh1/Prkca/Rph3a/Lrrk2/Rims1/Trim9/Prkcb	7	0	glut_neurons	Homer1+
GO:0017157	regulation of exocytosis	8/129	226/28564	9.095434786328072e-6	4.5765565766328815e-4	3.481718425267049e-4	Kcnh1/Prkca/Rph3a/Lrrk2/Rims1/Trim9/Pclo/Prkcb	8	0	glut_neurons	Homer1+
GO:0097061	dendritic spine organization	6/129	108/28564	9.908892784202465e-6	4.8671537651927824e-4	3.7027967772546055e-4	Homer1/Pak3/Rph3a/Lrrk2/Zfp804a/Ctnnd2	6	0	glut_neurons	Homer1+
GO:0010976	positive regulation of neuron projection development	8/129	237/28564	1.2839495075462544e-5	6.159971707134705e-4	4.686337125462583e-4	Pak3/Ntrk2/Lrrc7/Dmd/Magi2/Zfp804a/Bcl11a/Dcc	8	0	glut_neurons	Homer1+
GO:0106027	neuron projection organization	6/129	117/28564	1.56680611954033e-5	7.346184146844774e-4	5.588774938360363e-4	Homer1/Pak3/Rph3a/Lrrk2/Zfp804a/Ctnnd2	6	0	glut_neurons	Homer1+
GO:0099601	regulation of neurotransmitter receptor activity	5/129	72/28564	1.90808220728441e-5	8.747496874728306e-4	6.654855136984924e-4	Homer1/Dlgap2/Dlgap1/Rph3a/Cacng3	5	0	glut_neurons	Homer1+
GO:0070372	regulation of ERK1 and ERK2 cascade	9/129	329/28564	1.953323919737397e-5	8.7602331443875e-4	6.664544540797387e-4	Spred2/Prkca/Dlg1/Epha7/Dmd/Ptprr/Htr2a/Dcc/Spred1	9	0	glut_neurons	Homer1+
GO:0030900	forebrain development	10/129	416/28564	2.0319302022164e-5	8.918876611005177e-4	6.785236128789814e-4	Dab1/Phactr1/Ntrk2/Plcb1/Nfib/Dclk1/Lrrk2/Ptchd1/Nrg3/Sema3e	10	0	glut_neurons	Homer1+
GO:0045055	regulated exocytosis	8/129	254/28564	2.1135342601898213e-5	9.083794122440836e-4	6.910700837594349e-4	Kcnh1/Prkca/Rph3a/Lrrk2/Rims1/Trim9/Pclo/Prkcb	8	0	glut_neurons	Homer1+
GO:0051588	regulation of neurotransmitter transport	6/129	124/28564	2.180184066903335e-5	9.179019857186898e-4	6.983145958652787e-4	Kcnh1/Prkca/Ntrk2/Lrrk2/Rims1/Prkcb	6	0	glut_neurons	Homer1+
GO:0035249	synaptic transmission, glutamatergic	6/129	127/28564	2.496169356350551e-5	0.00102277	7.780950577155724e-4	Homer1/Shc3/Ntrk2/Cacng3/Lrrk2/Htr2a	6	0	glut_neurons	Homer1+
GO:1902074	response to salt	9/129	340/28564	2.528417541671327e-5	0.00102277	7.780950577155724e-4	Homer1/Kcnh1/Dlg2/Plcb1/Sorbs2/Kcnma1/Pcdh15/Htr2a/Prkcb	9	0	glut_neurons	Homer1+
GO:0030534	adult behavior	7/129	191/28564	2.6908214996401505e-5	0.00106753	8.121487562679078e-4	Homer1/Dab1/Oxr1/Atxn1/Kcnma1/Pcdh15/Htr2a	7	0	glut_neurons	Homer1+
GO:0055074	calcium ion homeostasis	9/129	347/28564	2.9646325385693467e-5	0.00115397	8.779080665356297e-4	Inpp4b/Kcnh1/Prkca/Tmtc2/Plcb1/Dmd/Htr2a/Mcu/Prkcb	9	0	glut_neurons	Homer1+
GO:0007626	locomotory behavior	8/129	270/28564	3.266304363670578e-5	0.00124785	9.49329396926478e-4	Lsamp/Dab1/Oxr1/Atxn1/Mapk10/Lrrk2/Kcnma1/Pcdh15	8	0	glut_neurons	Homer1+
GO:0070371	ERK1 and ERK2 cascade	9/129	353/28564	3.387823422034722e-5	0.00127074	9.667454013882814e-4	Spred2/Prkca/Dlg1/Epha7/Dmd/Ptprr/Htr2a/Dcc/Spred1	9	0	glut_neurons	Homer1+
GO:0048755	branching morphogenesis of a nerve	3/129	15/28564	3.935045552015884e-5	0.00144964	0.00110285	Lrrk2/Epha7/Bcl11a	3	0	glut_neurons	Homer1+
GO:0070373	negative regulation of ERK1 and ERK2 cascade	5/129	84/28564	4.031914850319406e-5	0.00145927	0.00111017	Spred2/Dlg1/Dmd/Ptprr/Spred1	5	0	glut_neurons	Homer1+
GO:0099175	regulation of postsynapse organization	6/129	139/28564	4.1490029764828464e-5	0.00147576	0.00112272	Homer1/Pak3/Lrrk2/Epha7/Zfp804a/Asap1	6	0	glut_neurons	Homer1+
GO:0046627	negative regulation of insulin receptor signaling pathway	4/129	44/28564	4.6853426371437255e-5	0.00163828	0.00124636	Prkca/Grb14/Pid1/Prkcb	4	0	glut_neurons	Homer1+
GO:1904062	regulation of monoatomic cation transmembrane transport	9/129	371/28564	4.9773237950114825e-5	0.00170559	0.00129757	Homer1/Cacnb2/Plcb1/Dlg1/Dpp10/Hecw1/Dmd/Pde4b/Dpp6	9	0	glut_neurons	Homer1+
GO:0051966	regulation of synaptic transmission, glutamatergic	5/129	88/28564	5.0431987500516856e-5	0.00170559	0.00129757	Homer1/Ntrk2/Cacng3/Lrrk2/Htr2a	5	0	glut_neurons	Homer1+
GO:0021955	central nervous system neuron axonogenesis	4/129	46/28564	5.593024904877109e-5	0.00186103	0.00141582	Prkca/Nfib/Dclk1/Dcc	4	0	glut_neurons	Homer1+
GO:0007628	adult walking behavior	4/129	47/28564	6.092008989767581e-5	0.00199489	0.00151766	Dab1/Oxr1/Kcnma1/Pcdh15	4	0	glut_neurons	Homer1+
GO:0006887	exocytosis	9/129	382/28564	6.228871466428276e-5	0.00200784	0.00152751	Lin7a/Kcnh1/Prkca/Rph3a/Lrrk2/Rims1/Trim9/Pclo/Prkcb	9	0	glut_neurons	Homer1+
GO:1900077	negative regulation of cellular response to insulin stimulus	4/129	49/28564	7.186244429905132e-5	0.0022808	0.00173517	Prkca/Grb14/Pid1/Prkcb	4	0	glut_neurons	Homer1+
GO:0001508	action potential	6/129	154/28564	7.340759021396322e-5	0.00229454	0.00174563	Cacnb2/Ntrk2/Dlg1/Dmd/Kcnma1/Dpp6	6	0	glut_neurons	Homer1+
GO:0072659	protein localization to plasma membrane	8/129	308/28564	8.228080109838795e-5	0.00253351	0.00192743	Cacnb2/Dlg1/Dpp10/Lrrc7/Pid1/Gpr158/Ptpn9/Dpp6	8	0	glut_neurons	Homer1+
GO:0090659	walking behavior	4/129	51/28564	8.416984925072251e-5	0.00255356	0.00194268	Dab1/Oxr1/Kcnma1/Pcdh15	4	0	glut_neurons	Homer1+
GO:0007613	memory	6/129	162/28564	9.707243659450798e-5	0.00289588	0.00220311	Sorcs3/Ntrk2/Plcb1/Atxn1/Ptchd1/Htr2a	6	0	glut_neurons	Homer1+
GO:0006874	intracellular calcium ion homeostasis	8/129	316/28564	9.826073486079606e-5	0.00289588	0.00220311	Inpp4b/Kcnh1/Prkca/Plcb1/Dmd/Htr2a/Mcu/Prkcb	8	0	glut_neurons	Homer1+
GO:0006936	muscle contraction	8/129	318/28564	1.0263378702835394e-4	0.00298216	0.00226875	Homer1/Cacnb2/Prkca/Dlg1/Dmd/Pde4b/Kcnma1/Htr2a	8	0	glut_neurons	Homer1+
GO:0010977	negative regulation of neuron projection development	6/129	165/28564	1.0736874869485414e-4	0.00307641	0.00234045	Dab1/Lrrk2/Epha7/Ptpn9/Sema3e/Bcl11a	6	0	glut_neurons	Homer1+
GO:0031503	protein-containing complex localization	7/129	239/28564	1.1058584637848783e-4	0.00312519	0.00237756	Dlg2/Cacng3/Mapk10/Dlg1/Lrrc7/Magi2/Gpc6	7	0	glut_neurons	Homer1+
GO:0045664	regulation of neuron differentiation	7/129	244/28564	1.2571064818278348e-4	0.00350461	0.00266621	Dab1/Rgs6/Lrrk2/Brinp3/Sox5/Dmd/Bcl11a	7	0	glut_neurons	Homer1+
GO:0006813	potassium ion transport	7/129	245/28564	1.289282068690064e-4	0.00354639	0.00269799	Kcnh1/Dlg1/Dpp10/Kcnma1/Kcnh5/Htr2a/Dpp6	7	0	glut_neurons	Homer1+
GO:0098962	regulation of postsynaptic neurotransmitter receptor activity	3/129	23/28564	1.4916847813252558e-4	0.00404914	0.00308047	Homer1/Dlgap2/Dlgap1	3	0	glut_neurons	Homer1+
GO:0051402	neuron apoptotic process	8/129	337/28564	1.5282014449250034e-4	0.00409439	0.0031149	Pak3/Thrb/Oxr1/Ntrk2/Epha7/Kcnma1/Sema3e/Ppp2r2b	8	0	glut_neurons	Homer1+
GO:0007411	axon guidance	7/129	253/28564	1.5715324945486764e-4	0.00410073	0.00311973	Epha6/Unc5d/Nfib/Epha7/Alcam/Sema3e/Dcc	7	0	glut_neurons	Homer1+
GO:0008344	adult locomotory behavior	5/129	112/28564	1.5841239927225247e-4	0.00410073	0.00311973	Dab1/Oxr1/Atxn1/Kcnma1/Pcdh15	5	0	glut_neurons	Homer1+
GO:0030166	proteoglycan biosynthetic process	4/129	60/28564	1.591694929967432e-4	0.00410073	0.00311973	Hs6st3/Chsy3/Ndst3/Ndst4	4	0	glut_neurons	Homer1+
GO:0097485	neuron projection guidance	7/129	254/28564	1.6100800794867687e-4	0.00410073	0.00311973	Epha6/Unc5d/Nfib/Epha7/Alcam/Sema3e/Dcc	7	0	glut_neurons	Homer1+
GO:0003012	muscle system process	9/129	436/28564	1.6901754527785505e-4	0.00421913	0.0032098	Homer1/Cacnb2/Prkca/Sorbs2/Dlg1/Dmd/Pde4b/Kcnma1/Htr2a	9	0	glut_neurons	Homer1+
GO:0097479	synaptic vesicle localization	4/129	61/28564	1.6974689314446298e-4	0.00421913	0.0032098	Lin7a/Lrrk2/Magi2/Pclo	4	0	glut_neurons	Homer1+
GO:0042551	neuron maturation	4/129	63/28564	1.9241046215921225e-4	0.00466152	0.00354636	Dlg2/Lrrk2/Kcnma1/Bcl11a	4	0	glut_neurons	Homer1+
GO:1903078	positive regulation of protein localization to plasma membrane	4/129	63/28564	1.9241046215921225e-4	0.00466152	0.00354636	Dlg1/Dpp10/Ptpn9/Dpp6	4	0	glut_neurons	Homer1+
GO:1903076	regulation of protein localization to plasma membrane	5/129	117/28564	1.943241346781461e-4	0.00466152	0.00354636	Dlg1/Dpp10/Pid1/Ptpn9/Dpp6	5	0	glut_neurons	Homer1+
GO:0043409	negative regulation of MAPK cascade	6/129	187/28564	2.121991147374482e-4	0.00497462	0.00378456	Spred2/Prkca/Dlg1/Dmd/Ptprr/Spred1	6	0	glut_neurons	Homer1+
GO:0050770	regulation of axonogenesis	6/129	187/28564	2.121991147374482e-4	0.00497462	0.00378456	Dab1/Pak3/Ntrk2/Epha7/Sema3e/Bcl11a	6	0	glut_neurons	Homer1+
GO:0010829	negative regulation of glucose transmembrane transport	3/129	26/28564	0.000216836	0.00502621	0.0038238	Prkca/Pid1/Prkcb	3	0	glut_neurons	Homer1+
GO:0006816	calcium ion transport	9/129	452/28564	2.2075097429962717e-4	0.0050601	0.00384959	Homer1/Cacnb2/Plcb1/Cacng3/Dmd/Pde4b/Htr2a/Mcu/Prkcb	9	0	glut_neurons	Homer1+
GO:0007015	actin filament organization	9/129	454/28564	2.2805599806492472e-4	0.0051701	0.00393327	Pak3/Elmo1/Phactr1/Sorbs2/Dlg1/Fam171a1/Pcdh15/Fhod3/Mcu	9	0	glut_neurons	Homer1+
GO:1903522	regulation of blood circulation	7/129	270/28564	2.3384506897896964e-4	0.00524372	0.00398928	Cacnb2/Prkca/Thrb/Dlg1/Dmd/Pde4b/Htr2a	7	0	glut_neurons	Homer1+
GO:0048813	dendrite morphogenesis	6/129	192/28564	2.4460912496419683e-4	0.00542531	0.00412742	Pak3/Phactr1/Dclk1/Lrrk2/Hecw1/Ctnnd2	6	0	glut_neurons	Homer1+
GO:0031346	positive regulation of cell projection organization	9/129	459/28564	2.4720254501282076e-4	0.00542531	0.00412742	Pak3/Ntrk2/Lrrc7/Dmd/Magi2/Zfp804a/Bcl11a/Dcc/Neurl1a	9	0	glut_neurons	Homer1+
GO:0021537	telencephalon development	7/129	274/28564	2.5567680490549104e-4	0.00549439	0.00417998	Dab1/Phactr1/Ntrk2/Plcb1/Nfib/Lrrk2/Nrg3	7	0	glut_neurons	Homer1+
GO:0043270	positive regulation of monoatomic ion transport	7/129	274/28564	2.5567680490549104e-4	0.00549439	0.00417998	Homer1/Cacnb2/Plcb1/Cacng3/Dlg1/Dmd/Dpp6	7	0	glut_neurons	Homer1+
GO:0050905	neuromuscular process	6/129	197/28564	2.8079473965277144e-4	0.00597195	0.0045433	Homer1/Kcnh1/Dmd/Kcnma1/Rbfox1/Pcdh15	6	0	glut_neurons	Homer1+
GO:0050771	negative regulation of axonogenesis	4/129	70/28564	2.890436101691858e-4	0.00608466	0.00462904	Dab1/Epha7/Sema3e/Bcl11a	4	0	glut_neurons	Homer1+
GO:1902473	regulation of protein localization to synapse	3/129	29/28564	3.0173734116751286e-4	0.00617355	0.00469667	Dlg1/Magi2/Gpc6	3	0	glut_neurons	Homer1+
GO:0008016	regulation of heart contraction	6/129	200/28564	3.044438948348112e-4	0.00617355	0.00469667	Cacnb2/Prkca/Thrb/Dlg1/Dmd/Pde4b	6	0	glut_neurons	Homer1+
GO:0043113	receptor clustering	4/129	71/28564	3.052360695698446e-4	0.00617355	0.00469667	Lrrtm4/Dlg2/Sorbs2/Magi2	4	0	glut_neurons	Homer1+
GO:1904377	positive regulation of protein localization to cell periphery	4/129	71/28564	3.052360695698446e-4	0.00617355	0.00469667	Dlg1/Dpp10/Ptpn9/Dpp6	4	0	glut_neurons	Homer1+
GO:0015012	heparan sulfate proteoglycan biosynthetic process	3/129	30/28564	3.341600682929654e-4	0.0066483	0.00505784	Hs6st3/Ndst3/Ndst4	3	0	glut_neurons	Homer1+
GO:0051962	positive regulation of nervous system development	8/129	379/28564	3.3730231400435853e-4	0.0066483	0.00505784	Lingo2/Lrrtm4/Pak3/Prkca/Ntrk2/Atxn1/Bcl11a/Neurl1a	8	0	glut_neurons	Homer1+
GO:0031644	regulation of nervous system process	6/129	204/28564	3.3837678607374276e-4	0.0066483	0.00505784	Homer1/Dlgap2/Dlgap1/Lrrk2/Rims1/Pclo	6	0	glut_neurons	Homer1+
GO:0009101	glycoprotein biosynthetic process	7/129	290/28564	3.600122265646579e-4	0.00698587	0.00531466	Hs6st3/Tmtc2/Plcb1/Galnt18/Chsy3/Ndst3/Ndst4	7	0	glut_neurons	Homer1+
GO:0060996	dendritic spine development	5/129	134/28564	3.642838284722431e-4	0.00698587	0.00531466	Pak3/Lrrk2/Asap1/Ctnnd2/Neurl1a	5	0	glut_neurons	Homer1+
GO:0071805	potassium ion transmembrane transport	6/129	207/28564	3.657170380138059e-4	0.00698587	0.00531466	Kcnh1/Dlg1/Dpp10/Kcnma1/Kcnh5/Dpp6	6	0	glut_neurons	Homer1+
GO:0043523	regulation of neuron apoptotic process	7/129	294/28564	3.908020975995741e-4	0.00739656	0.0056271	Pak3/Oxr1/Ntrk2/Epha7/Kcnma1/Sema3e/Ppp2r2b	7	0	glut_neurons	Homer1+
GO:0098742	cell-cell adhesion via plasma-membrane adhesion molecules	6/129	211/28564	4.048271243389532e-4	0.00759235	0.00577605	Unc5d/Dab1/Alcam/Magi2/Pcdh15/Cdh18	6	0	glut_neurons	Homer1+
GO:0021952	central nervous system projection neuron axonogenesis	3/129	33/28564	4.44640072191941e-4	0.00805795	0.00613027	Nfib/Dclk1/Dcc	3	0	glut_neurons	Homer1+
GO:0099637	neurotransmitter receptor transport	3/129	33/28564	4.44640072191941e-4	0.00805795	0.00613027	Cacng3/Mapk10/Lrrc7	3	0	glut_neurons	Homer1+
GO:1903429	regulation of cell maturation	3/129	33/28564	4.44640072191941e-4	0.00805795	0.00613027	Lrrk2/Grb14/Bcl11a	3	0	glut_neurons	Homer1+
GO:0051963	regulation of synapse assembly	5/129	140/28564	4.452769363241426e-4	0.00805795	0.00613027	Lingo2/Lrrtm4/Prkca/Ntrk2/Epha7	5	0	glut_neurons	Homer1+
GO:0008286	insulin receptor signaling pathway	5/129	141/28564	4.5999509717216446e-4	0.00825191	0.00627783	Prkca/Plcb1/Grb14/Pid1/Prkcb	5	0	glut_neurons	Homer1+
GO:0051965	positive regulation of synapse assembly	4/129	80/28564	4.815406430775866e-4	0.00856395	0.00651522	Lingo2/Lrrtm4/Prkca/Ntrk2	4	0	glut_neurons	Homer1+
GO:0031345	negative regulation of cell projection organization	6/129	219/28564	4.928112773567436e-4	0.00868948	0.00661072	Dab1/Lrrk2/Epha7/Ptpn9/Sema3e/Bcl11a	6	0	glut_neurons	Homer1+
GO:0032535	regulation of cellular component size	8/129	404/28564	5.144699330325623e-4	0.0089945	0.00684277	Pak3/Dlg1/Epha7/Kcnma1/Fhod3/Pclo/Sema3e/Bcl11a	8	0	glut_neurons	Homer1+
GO:0010038	response to metal ion	7/129	309/28564	5.255606579035346e-4	0.00911119	0.00693154	Homer1/Kcnh1/Dlg2/Pam/Lrrk2/Kcnma1/Pcdh15	7	0	glut_neurons	Homer1+
GO:0048469	cell maturation	6/129	227/28564	5.950273621698255e-4	0.010229512067969584	0.00778233	Dlg2/Plcb1/Lrrk2/Grb14/Kcnma1/Bcl11a	6	0	glut_neurons	Homer1+
GO:0046626	regulation of insulin receptor signaling pathway	4/129	86/28564	6.332182367038374e-4	0.010796109275372036	0.00821338	Prkca/Grb14/Pid1/Prkcb	4	0	glut_neurons	Homer1+
GO:2001257	regulation of cation channel activity	5/129	152/28564	6.471890968024563e-4	0.0109439	0.00832579	Homer1/Cacnb2/Dlg1/Dmd/Pde4b	5	0	glut_neurons	Homer1+
GO:0043525	positive regulation of neuron apoptotic process	4/129	88/28564	6.905294845737606e-4	0.011581807533948522	0.00881112	Pak3/Epha7/Kcnma1/Ppp2r2b	4	0	glut_neurons	Homer1+
GO:0018105	peptidyl-serine phosphorylation	7/129	326/28564	7.205401548498407e-4	0.011987696285929205	0.00911991	Prkca/Ntrk2/Dclk1/Lrrk2/Mast4/Dmd/Prkcb	7	0	glut_neurons	Homer1+
GO:0099170	postsynaptic modulation of chemical synaptic transmission	3/129	39/28564	7.302172841784009e-4	0.012051506058080329	0.00916845	Sorcs3/Plcb1/Dcc	3	0	glut_neurons	Homer1+
GO:1900076	regulation of cellular response to insulin stimulus	4/129	90/28564	7.514194220799386e-4	0.012303	0.00935979	Prkca/Grb14/Pid1/Prkcb	4	0	glut_neurons	Homer1+
GO:1990089	response to nerve growth factor	3/129	40/28564	7.868306141944493e-4	0.0126815	0.00964773	Ntrk2/Dlg1/Magi2	3	0	glut_neurons	Homer1+
GO:1990090	cellular response to nerve growth factor stimulus	3/129	40/28564	7.868306141944493e-4	0.0126815	0.00964773	Ntrk2/Dlg1/Magi2	3	0	glut_neurons	Homer1+
GO:0060047	heart contraction	6/129	242/28564	8.303969923035337e-4	0.013177761500939923	0.010025278668215131	Cacnb2/Prkca/Thrb/Dlg1/Dmd/Pde4b	6	0	glut_neurons	Homer1+
GO:1901888	regulation of cell junction assembly	6/129	242/28564	8.303969923035337e-4	0.013177761500939923	0.010025278668215131	Lingo2/Lrrtm4/Prkca/Ntrk2/Peak1/Epha7	6	0	glut_neurons	Homer1+
GO:0006029	proteoglycan metabolic process	4/129	94/28564	8.844238670301935e-4	0.013682671592026166	0.010409400384575867	Hs6st3/Chsy3/Ndst3/Ndst4	4	0	glut_neurons	Homer1+
GO:0007207	phospholipase C-activating G protein-coupled acetylcholine receptor signaling pathway	2/129	10/28564	8.89380265443284e-4	0.013682671592026166	0.010409400384575867	Plcb1/Prkcb	2	0	glut_neurons	Homer1+
GO:0048671	negative regulation of collateral sprouting	2/129	10/28564	8.89380265443284e-4	0.013682671592026166	0.010409400384575867	Epha7/Bcl11a	2	0	glut_neurons	Homer1+
GO:1902746	regulation of lens fiber cell differentiation	2/129	10/28564	8.89380265443284e-4	0.013682671592026166	0.010409400384575867	Spred2/Spred1	2	0	glut_neurons	Homer1+
GO:0033674	positive regulation of kinase activity	8/129	440/28564	8.953759888141214e-4	0.013682671592026166	0.010409400384575867	Dab1/Ntrk2/Dlg1/Lrrk2/Kitl/Htr2a/Neurl1a/Ghr	8	0	glut_neurons	Homer1+
GO:0070588	calcium ion transmembrane transport	7/129	339/28564	9.051654757959309e-4	0.013730561592404452	0.010445833780276569	Cacnb2/Plcb1/Cacng3/Dmd/Pde4b/Htr2a/Mcu	7	0	glut_neurons	Homer1+
GO:0060079	excitatory postsynaptic potential	4/129	95/28564	9.201026325842084e-4	0.013855268109643958	0.010540707070173298	Atxn1/Lrrk2/Rims1/Pclo	4	0	glut_neurons	Homer1+
GO:0001763	morphogenesis of a branching structure	6/129	249/28564	9.621907971290495e-4	0.014384055177371225	0.010942993733939076	Dlg1/Lrrk2/Epha7/Sema3e/Bcl11a/Ctnnd2	6	0	glut_neurons	Homer1+
GO:0018209	peptidyl-serine modification	7/129	345/28564	0.00100207	0.0148725	0.011314587805331759	Prkca/Ntrk2/Dclk1/Lrrk2/Mast4/Dmd/Prkcb	7	0	glut_neurons	Homer1+
GO:0006937	regulation of muscle contraction	5/129	168/28564	0.00101452	0.014949685291408875	0.011373309574452447	Prkca/Dlg1/Dmd/Pde4b/Kcnma1	5	0	glut_neurons	Homer1+
GO:0003015	heart process	6/129	255/28564	0.00108749	0.0159112	0.012104819941510993	Cacnb2/Prkca/Thrb/Dlg1/Dmd/Pde4b	6	0	glut_neurons	Homer1+
GO:0048015	phosphatidylinositol-mediated signaling	5/129	171/28564	0.00109773	0.0159481	0.012132850959421966	Kcnh1/Ntrk2/Plcb1/Htr2a/Sema3e	5	0	glut_neurons	Homer1+
GO:0019226	transmission of nerve impulse	4/129	101/28564	0.00115575	0.016560637243285437	0.012598877531310344	Ntrk2/Cacng3/Kcnma1/Dpp6	4	0	glut_neurons	Homer1+
GO:0006941	striated muscle contraction	5/129	173/28564	0.00115595	0.016560637243285437	0.012598877531310344	Homer1/Cacnb2/Dlg1/Dmd/Pde4b	5	0	glut_neurons	Homer1+
GO:0002028	regulation of sodium ion transport	4/129	103/28564	0.00124288	0.017683165289480218	0.013452866008426666	Plcb1/Hecw1/Dmd/Nkain2	4	0	glut_neurons	Homer1+
GO:0095500	acetylcholine receptor signaling pathway	3/129	47/28564	0.00126196	0.017710359058999616	0.013473554280668636	Plcb1/Sorbs2/Prkcb	3	0	glut_neurons	Homer1+
GO:1901385	regulation of voltage-gated calcium channel activity	3/129	47/28564	0.00126196	0.017710359058999616	0.013473554280668636	Cacnb2/Dmd/Pde4b	3	0	glut_neurons	Homer1+
GO:0040013	negative regulation of locomotion	7/129	360/28564	0.00128031	0.017834292748764104	0.013567839624668867	Nav3/Plcb1/Nrg3/Magi2/Ptprr/Sema3e/Spred1	7	0	glut_neurons	Homer1+
GO:0014832	urinary bladder smooth muscle contraction	2/129	12/28564	0.00129673	0.017834292748764104	0.013567839624668867	Kcnma1/Htr2a	2	0	glut_neurons	Homer1+
GO:0061669	spontaneous neurotransmitter secretion	2/129	12/28564	0.00129673	0.017834292748764104	0.013567839624668867	Rph3a/Rims1	2	0	glut_neurons	Homer1+
GO:0009100	glycoprotein metabolic process	7/129	362/28564	0.00132157	0.018055592444582533	0.013736198349298444	Hs6st3/Tmtc2/Plcb1/Galnt18/Chsy3/Ndst3/Ndst4	7	0	glut_neurons	Homer1+
GO:0001941	postsynaptic membrane organization	3/129	48/28564	0.00134168	0.018209709935121235	0.013853446699117667	Lrrtm4/Sorbs2/Magi2	3	0	glut_neurons	Homer1+
GO:0018198	peptidyl-cysteine modification	3/129	49/28564	0.00142449	0.019082603462594057	0.014517520097317518	Oxr1/Zdhhc14/Dmd	3	0	glut_neurons	Homer1+
GO:1905145	cellular response to acetylcholine	3/129	49/28564	0.00142449	0.019082603462594057	0.014517520097317518	Plcb1/Sorbs2/Prkcb	3	0	glut_neurons	Homer1+
GO:0050730	regulation of peptidyl-tyrosine phosphorylation	6/129	270/28564	0.00145563	0.019374006666767467	0.014739211643824928	Prkca/Kitl/Epha7/Htr2a/Neurl1a/Ghr	6	0	glut_neurons	Homer1+
GO:0048009	insulin-like growth factor receptor signaling pathway	3/129	50/28564	0.00151045	0.0199747	0.015196181723905971	Plcb1/Atxn1/Ghr	3	0	glut_neurons	Homer1+
GO:1903430	negative regulation of cell maturation	2/129	13/28564	0.00152797	0.020077671511950754	0.015274540512956895	Grb14/Bcl11a	2	0	glut_neurons	Homer1+
GO:0050767	regulation of neurogenesis	8/129	480/28564	0.00155531	0.020307688533065672	0.015449531139016209	Dab1/Pak3/Ntrk2/Atxn1/Epha7/Sema3e/Bcl11a/Neurl1a	8	0	glut_neurons	Homer1+
GO:0045860	positive regulation of protein kinase activity	7/129	373/28564	0.00156745	0.020337464641571254	0.0154722	Dab1/Dlg1/Lrrk2/Kitl/Htr2a/Neurl1a/Ghr	7	0	glut_neurons	Homer1+
GO:1905477	positive regulation of protein localization to membrane	4/129	111/28564	0.00163759	0.021114649671802554	0.016063444988472383	Dlg1/Dpp10/Ptpn9/Dpp6	4	0	glut_neurons	Homer1+
GO:0022604	regulation of cell morphogenesis	6/129	278/28564	0.00168727	0.021546358251345783	0.016391877007299823	Pak3/Dlg1/Rims1/Fam171a1/Sema3e/Bcl11a	6	0	glut_neurons	Homer1+
GO:1905144	response to acetylcholine	3/129	52/28564	0.00169196	0.021546358251345783	0.016391877007299823	Plcb1/Sorbs2/Prkcb	3	0	glut_neurons	Homer1+
GO:0007612	learning	5/129	190/28564	0.00174738	0.022115580319439578	0.016824925507709476	Meis2/Sorcs3/Ntrk2/Atxn1/Ctnnd2	5	0	glut_neurons	Homer1+
GO:0021700	developmental maturation	7/129	381/28564	0.00176766	0.022222426129419607	0.016906210862547965	Dlg2/Plcb1/Lrrk2/Grb14/Kcnma1/Bcl11a/Neurl1a	7	0	glut_neurons	Homer1+
GO:1901841	regulation of high voltage-gated calcium channel activity	2/129	14/28564	0.00177736	0.022222426129419607	0.016906210862547965	Cacnb2/Pde4b	2	0	glut_neurons	Homer1+
GO:0018107	peptidyl-threonine phosphorylation	4/129	115/28564	0.00186435	0.023169580896080993	0.0176268	Spred2/Prkca/Lrrk2/Spred1	4	0	glut_neurons	Homer1+
GO:0014904	myotube cell development	3/129	54/28564	0.00188655	0.0233051	0.017729899334918614	Homer1/Lncpint/Dmd	3	0	glut_neurons	Homer1+
GO:0043266	regulation of potassium ion transport	4/129	116/28564	0.00192426	0.023351517330017686	0.0177652	Dlg1/Dpp10/Htr2a/Dpp6	4	0	glut_neurons	Homer1+
GO:0044272	sulfur compound biosynthetic process	4/129	116/28564	0.00192426	0.023351517330017686	0.0177652	Hs6st3/Chsy3/Ndst3/Ndst4	4	0	glut_neurons	Homer1+
GO:0099565	chemical synaptic transmission, postsynaptic	4/129	116/28564	0.00192426	0.023351517330017686	0.0177652	Atxn1/Lrrk2/Rims1/Pclo	4	0	glut_neurons	Homer1+
GO:0048588	developmental cell growth	6/129	287/28564	0.00198024	0.0237624	0.018077790648411037	Sorbs2/Dclk1/Epha7/Rims1/Sema3e/Bcl11a	6	0	glut_neurons	Homer1+
GO:0045666	positive regulation of neuron differentiation	4/129	117/28564	0.0019855	0.0237624	0.018077790648411037	Dab1/Rgs6/Brinp3/Dmd	4	0	glut_neurons	Homer1+
GO:0014848	urinary tract smooth muscle contraction	2/129	15/28564	0.00204475	0.0237624	0.018077790648411037	Kcnma1/Htr2a	2	0	glut_neurons	Homer1+
GO:0018119	peptidyl-cysteine S-nitrosylation	2/129	15/28564	0.00204475	0.0237624	0.018077790648411037	Oxr1/Dmd	2	0	glut_neurons	Homer1+
GO:0043517	positive regulation of DNA damage response, signal transduction by p53 class mediator	2/129	15/28564	0.00204475	0.0237624	0.018077790648411037	Spred2/Spred1	2	0	glut_neurons	Homer1+
GO:1902075	cellular response to salt	5/129	197/28564	0.0020461	0.0237624	0.018077790648411037	Kcnh1/Dlg2/Plcb1/Sorbs2/Prkcb	5	0	glut_neurons	Homer1+
GO:0021987	cerebral cortex development	4/129	118/28564	0.00204807	0.0237624	0.018077790648411037	Dab1/Phactr1/Ntrk2/Plcb1	4	0	glut_neurons	Homer1+
GO:0071375	cellular response to peptide hormone stimulus	6/129	289/28564	0.00205027	0.0237624	0.018077790648411037	Prkca/Plcb1/Grb14/Pid1/Prkcb/Ghr	6	0	glut_neurons	Homer1+
GO:0002062	chondrocyte differentiation	4/129	120/28564	0.00217728	0.025093494393481037	0.0190904	Prkca/Thrb/Nfib/Sox5	4	0	glut_neurons	Homer1+
GO:2001222	regulation of neuron migration	3/129	57/28564	0.00220368	0.0252566	0.0192145	Unc5d/Phactr1/Nrg3	3	0	glut_neurons	Homer1+
GO:0019932	second-messenger-mediated signaling	6/129	295/28564	0.00227163	0.0258916	0.019697625933081005	Pde10a/Ntrk2/Lrrk2/Dmd/Mcu/Cap2	6	0	glut_neurons	Homer1+
GO:0007528	neuromuscular junction development	3/129	58/28564	0.00231627	0.025982213559818317	0.0197666	Cacnb2/Sorbs2/Lrrk2	3	0	glut_neurons	Homer1+
GO:0043687	post-translational protein modification	3/129	58/28564	0.00231627	0.025982213559818317	0.0197666	Prkca/Agbl4/Prkcb	3	0	glut_neurons	Homer1+
GO:0017014	protein nitrosylation	2/129	16/28564	0.00232996	0.025982213559818317	0.0197666	Oxr1/Dmd	2	0	glut_neurons	Homer1+
GO:1902950	regulation of dendritic spine maintenance	2/129	16/28564	0.00232996	0.025982213559818317	0.0197666	Homer1/Zfp804a	2	0	glut_neurons	Homer1+
GO:0018210	peptidyl-threonine modification	4/129	124/28564	0.00245238	0.027172073258162933	0.020671766322892533	Spred2/Prkca/Lrrk2/Spred1	4	0	glut_neurons	Homer1+
GO:0034767	positive regulation of monoatomic ion transmembrane transport	5/129	206/28564	0.00248297	0.027172073258162933	0.020671766322892533	Cacnb2/Plcb1/Cacng3/Dmd/Dpp6	5	0	glut_neurons	Homer1+
GO:0042326	negative regulation of phosphorylation	7/129	405/28564	0.00248935	0.027172073258162933	0.020671766322892533	Spred2/Prkca/Atxn1/Lrrk2/Dmd/Pid1/Spred1	7	0	glut_neurons	Homer1+
GO:0048638	regulation of developmental growth	7/129	405/28564	0.00248935	0.027172073258162933	0.020671766322892533	Plcb1/Dlg1/Epha7/Rims1/Sema3e/Bcl11a/Ghr	7	0	glut_neurons	Homer1+
GO:2000649	regulation of sodium ion transmembrane transporter activity	3/129	60/28564	0.00255201	0.027709482655049054	0.021080612617638154	Plcb1/Hecw1/Dmd	3	0	glut_neurons	Homer1+
GO:0050855	regulation of B cell receptor signaling pathway	2/129	17/28564	0.00263283	0.028142664221014933	0.021410165244040748	Plcl2/Prkcb	2	0	glut_neurons	Homer1+
GO:1903423	positive regulation of synaptic vesicle recycling	2/129	17/28564	0.00263283	0.028142664221014933	0.021410165244040748	Lrrk2/Pclo	2	0	glut_neurons	Homer1+
GO:2000651	positive regulation of sodium ion transmembrane transporter activity	2/129	17/28564	0.00263283	0.028142664221014933	0.021410165244040748	Plcb1/Dmd	2	0	glut_neurons	Homer1+
GO:1901890	positive regulation of cell junction assembly	4/129	127/28564	0.00267375	0.028208919258045143	0.0214606	Lingo2/Lrrtm4/Prkca/Ntrk2	4	0	glut_neurons	Homer1+
GO:0099171	presynaptic modulation of chemical synaptic transmission	3/129	61/28564	0.00267523	0.028208919258045143	0.0214606	Prkca/Htr2a/Prkcb	3	0	glut_neurons	Homer1+
GO:0071695	anatomical structure maturation	6/129	305/28564	0.00268005	0.028208919258045143	0.0214606	Dlg2/Plcb1/Lrrk2/Grb14/Kcnma1/Bcl11a	6	0	glut_neurons	Homer1+
GO:0086001	cardiac muscle cell action potential	3/129	62/28564	0.00280207	0.0291953	0.022211	Cacnb2/Dlg1/Dmd	3	0	glut_neurons	Homer1+
GO:0090311	regulation of protein deacetylation	3/129	62/28564	0.00280207	0.0291953	0.022211	Spred2/Lrrk2/Spred1	3	0	glut_neurons	Homer1+
GO:0098815	modulation of excitatory postsynaptic potential	3/129	63/28564	0.00293255	0.0303107	0.023059570987471373	Lrrk2/Rims1/Pclo	3	0	glut_neurons	Homer1+
GO:0014041	regulation of neuron maturation	2/129	18/28564	0.0029532	0.0303107	0.023059570987471373	Lrrk2/Bcl11a	2	0	glut_neurons	Homer1+
GO:0098814	spontaneous synaptic transmission	2/129	18/28564	0.0029532	0.0303107	0.023059570987471373	Rph3a/Rims1	2	0	glut_neurons	Homer1+
GO:0060048	cardiac muscle contraction	4/129	131/28564	0.00298972	0.030458599833525148	0.023172065388568513	Cacnb2/Dlg1/Dmd/Pde4b	4	0	glut_neurons	Homer1+
GO:0030336	negative regulation of cell migration	6/129	312/28564	0.00299714	0.030458599833525148	0.023172065388568513	Nav3/Plcb1/Nrg3/Magi2/Ptprr/Spred1	6	0	glut_neurons	Homer1+
GO:0032414	positive regulation of ion transmembrane transporter activity	4/129	132/28564	0.00307253	0.0307701	0.023409010966752578	Cacnb2/Plcb1/Cacng3/Dmd	4	0	glut_neurons	Homer1+
GO:0043406	positive regulation of MAP kinase activity	4/129	132/28564	0.00307253	0.0307701	0.023409010966752578	Lrrk2/Kitl/Htr2a/Ghr	4	0	glut_neurons	Homer1+
GO:0060078	regulation of postsynaptic membrane potential	4/129	132/28564	0.00307253	0.0307701	0.023409010966752578	Atxn1/Lrrk2/Rims1/Pclo	4	0	glut_neurons	Homer1+
GO:0098926	postsynaptic signal transduction	3/129	65/28564	0.0032046	0.0319376	0.024297245253485537	Plcb1/Sorbs2/Prkcb	3	0	glut_neurons	Homer1+
GO:0010721	negative regulation of cell development	6/129	318/28564	0.00329059	0.032034423829976635	0.0243709	Inpp4b/Dab1/Epha7/Grb14/Sema3e/Bcl11a	6	0	glut_neurons	Homer1+
GO:0001654	eye development	7/129	426/28564	0.00329062	0.032034423829976635	0.0243709	Meis2/Spred2/Thrb/Ntrk2/Nfib/Dlg1/Spred1	7	0	glut_neurons	Homer1+
GO:0098696	regulation of neurotransmitter receptor localization to postsynaptic specialization membrane	2/129	19/28564	0.00329091	0.032034423829976635	0.0243709	Magi2/Gpc6	2	0	glut_neurons	Homer1+
GO:0106070	regulation of adenylate cyclase-activating G protein-coupled receptor signaling pathway	2/129	19/28564	0.00329091	0.032034423829976635	0.0243709	Pde10a/Pde4b	2	0	glut_neurons	Homer1+
GO:0048639	positive regulation of developmental growth	5/129	220/28564	0.00329195	0.032034423829976635	0.0243709	Plcb1/Dlg1/Rims1/Bcl11a/Ghr	5	0	glut_neurons	Homer1+
GO:0032869	cellular response to insulin stimulus	5/129	221/28564	0.00335619	0.0325062	0.024729806775655023	Prkca/Plcb1/Grb14/Pid1/Prkcb	5	0	glut_neurons	Homer1+
GO:0150063	visual system development	7/129	429/28564	0.00341951	0.0329647	0.025078669409092008	Meis2/Spred2/Thrb/Ntrk2/Nfib/Dlg1/Spred1	7	0	glut_neurons	Homer1+
GO:0008277	regulation of G protein-coupled receptor signaling pathway	4/129	137/28564	0.00351014	0.0335251	0.025504957509257853	Pde10a/Plcb1/Rgs6/Pde4b	4	0	glut_neurons	Homer1+
GO:0051592	response to calcium ion	4/129	137/28564	0.00351014	0.0335251	0.025504957509257853	Homer1/Kcnh1/Kcnma1/Pcdh15	4	0	glut_neurons	Homer1+
GO:0048880	sensory system development	7/129	433/28564	0.00359733	0.0340066	0.025871296055390437	Meis2/Spred2/Thrb/Ntrk2/Nfib/Dlg1/Spred1	7	0	glut_neurons	Homer1+
GO:0010801	negative regulation of peptidyl-threonine phosphorylation	2/129	20/28564	0.00364579	0.0340066	0.025871296055390437	Spred2/Spred1	2	0	glut_neurons	Homer1+
GO:0035641	locomotory exploration behavior	2/129	20/28564	0.00364579	0.0340066	0.025871296055390437	Lsamp/Lrrk2	2	0	glut_neurons	Homer1+
GO:0048148	behavioral response to cocaine	2/129	20/28564	0.00364579	0.0340066	0.025871296055390437	Homer1/Htr2a	2	0	glut_neurons	Homer1+
GO:0097091	synaptic vesicle clustering	2/129	20/28564	0.00364579	0.0340066	0.025871296055390437	Magi2/Pclo	2	0	glut_neurons	Homer1+
GO:2000146	negative regulation of cell motility	6/129	325/28564	0.00365946	0.0340066	0.025871296055390437	Nav3/Plcb1/Nrg3/Magi2/Ptprr/Spred1	6	0	glut_neurons	Homer1+
GO:0018108	peptidyl-tyrosine phosphorylation	6/129	326/28564	0.00371457	0.0343639	0.0261431	Prkca/Kitl/Epha7/Htr2a/Neurl1a/Ghr	6	0	glut_neurons	Homer1+
GO:0032411	positive regulation of transporter activity	4/129	140/28564	0.00379207	0.034786	0.0264642	Cacnb2/Plcb1/Cacng3/Dmd	4	0	glut_neurons	Homer1+
GO:0022029	telencephalon cell migration	3/129	69/28564	0.00379392	0.034786	0.0264642	Dab1/Lrrk2/Nrg3	3	0	glut_neurons	Homer1+
GO:0018212	peptidyl-tyrosine modification	6/129	328/28564	0.00382662	0.0349306	0.026574266902497264	Prkca/Kitl/Epha7/Htr2a/Neurl1a/Ghr	6	0	glut_neurons	Homer1+
GO:0007213	G protein-coupled acetylcholine receptor signaling pathway	2/129	21/28564	0.00401769	0.036353	0.0276564	Plcb1/Prkcb	2	0	glut_neurons	Homer1+
GO:0046325	negative regulation of glucose import	2/129	21/28564	0.00401769	0.036353	0.0276564	Prkca/Pid1	2	0	glut_neurons	Homer1+
GO:0050885	neuromuscular process controlling balance	3/129	71/28564	0.00411169	0.0367204	0.0279359	Kcnma1/Rbfox1/Pcdh15	3	0	glut_neurons	Homer1+
GO:0055117	regulation of cardiac muscle contraction	3/129	71/28564	0.00411169	0.0367204	0.0279359	Dlg1/Dmd/Pde4b	3	0	glut_neurons	Homer1+
GO:0086003	cardiac muscle cell contraction	3/129	71/28564	0.00411169	0.0367204	0.0279359	Cacnb2/Dlg1/Pde4b	3	0	glut_neurons	Homer1+
GO:1901653	cellular response to peptide	6/129	334/28564	0.00417788	0.037150701146224596	0.028263232088690905	Prkca/Plcb1/Grb14/Pid1/Prkcb/Ghr	6	0	glut_neurons	Homer1+
GO:0021885	forebrain cell migration	3/129	72/28564	0.00427645	0.037382737944524465	0.028439759305705015	Dab1/Lrrk2/Nrg3	3	0	glut_neurons	Homer1+
GO:0071868	cellular response to monoamine stimulus	3/129	72/28564	0.00427645	0.037382737944524465	0.028439759305705015	Lrrk2/Pde4b/Htr2a	3	0	glut_neurons	Homer1+
GO:0071870	cellular response to catecholamine stimulus	3/129	72/28564	0.00427645	0.037382737944524465	0.028439759305705015	Lrrk2/Pde4b/Htr2a	3	0	glut_neurons	Homer1+
GO:1902305	regulation of sodium ion transmembrane transport	3/129	72/28564	0.00427645	0.037382737944524465	0.028439759305705015	Plcb1/Hecw1/Dmd	3	0	glut_neurons	Homer1+
GO:0050773	regulation of dendrite development	4/129	145/28564	0.00429542	0.0373901	0.028445323967734915	Pak3/Ntrk2/Hecw1/Bcl11a	4	0	glut_neurons	Homer1+
GO:0055001	muscle cell development	5/129	235/28564	0.00435297	0.0374094	0.028460058632171232	Homer1/Lncpint/Sorbs2/Dmd/Fhod3	5	0	glut_neurons	Homer1+
GO:0046488	phosphatidylinositol metabolic process	4/129	146/28564	0.00440123	0.0374094	0.028460058632171232	Inpp4b/Plcb1/Synj2/Htr2a	4	0	glut_neurons	Homer1+
GO:0032332	positive regulation of chondrocyte differentiation	2/129	22/28564	0.00440644	0.0374094	0.028460058632171232	Thrb/Sox5	2	0	glut_neurons	Homer1+
GO:0045475	locomotor rhythm	2/129	22/28564	0.00440644	0.0374094	0.028460058632171232	Mapk10/Kcnma1	2	0	glut_neurons	Homer1+
GO:0048532	anatomical structure arrangement	2/129	22/28564	0.00440644	0.0374094	0.028460058632171232	Dab1/Dmd	2	0	glut_neurons	Homer1+
GO:0098969	neurotransmitter receptor transport to postsynaptic membrane	2/129	22/28564	0.00440644	0.0374094	0.028460058632171232	Mapk10/Lrrc7	2	0	glut_neurons	Homer1+
GO:0016311	dephosphorylation	6/129	342/28564	0.00468266	0.039236924868560404	0.029850373742390263	Inpp4b/Synj2/Magi2/Ptprr/Ptpn9/Ppp2r2b	6	0	glut_neurons	Homer1+
GO:0017156	calcium-ion regulated exocytosis	3/129	75/28564	0.00479461	0.039236924868560404	0.029850373742390263	Rph3a/Rims1/Trim9	3	0	glut_neurons	Homer1+
GO:0071867	response to monoamine	3/129	75/28564	0.00479461	0.039236924868560404	0.029850373742390263	Lrrk2/Pde4b/Htr2a	3	0	glut_neurons	Homer1+
GO:0071869	response to catecholamine	3/129	75/28564	0.00479461	0.039236924868560404	0.029850373742390263	Lrrk2/Pde4b/Htr2a	3	0	glut_neurons	Homer1+
GO:0010738	regulation of protein kinase A signaling	2/129	23/28564	0.0048119	0.039236924868560404	0.029850373742390263	Pde10a/Lrrk2	2	0	glut_neurons	Homer1+
GO:0048670	regulation of collateral sprouting	2/129	23/28564	0.0048119	0.039236924868560404	0.029850373742390263	Epha7/Bcl11a	2	0	glut_neurons	Homer1+
GO:0071398	cellular response to fatty acid	2/129	23/28564	0.0048119	0.039236924868560404	0.029850373742390263	Plcb1/Pid1	2	0	glut_neurons	Homer1+
GO:1900120	regulation of receptor binding	2/129	23/28564	0.0048119	0.039236924868560404	0.029850373742390263	Plcl1/Plcl2	2	0	glut_neurons	Homer1+
GO:1902307	positive regulation of sodium ion transmembrane transport	2/129	23/28564	0.0048119	0.039236924868560404	0.029850373742390263	Plcb1/Dmd	2	0	glut_neurons	Homer1+
GO:1903540	establishment of protein localization to postsynaptic membrane	2/129	23/28564	0.0048119	0.039236924868560404	0.029850373742390263	Mapk10/Lrrc7	2	0	glut_neurons	Homer1+
GO:0046777	protein autophosphorylation	5/129	242/28564	0.00492337	0.0397837	0.030266339141546583	Prkca/Ntrk2/Peak1/Lrrk2/Epha7	5	0	glut_neurons	Homer1+
GO:0097529	myeloid leukocyte migration	5/129	242/28564	0.00492337	0.0397837	0.030266339141546583	Prkca/Plcb1/Kitl/Pde4b/Mcu	5	0	glut_neurons	Homer1+
GO:0034763	negative regulation of transmembrane transport	4/129	151/28564	0.00495671	0.0397837	0.030266339141546583	Prkca/Hecw1/Pid1/Prkcb	4	0	glut_neurons	Homer1+
GO:0042982	amyloid precursor protein metabolic process	3/129	76/28564	0.00497537	0.0397837	0.030266339141546583	Ntrk2/Dlg1/Slc2a13	3	0	glut_neurons	Homer1+
GO:0060997	dendritic spine morphogenesis	3/129	76/28564	0.00497537	0.0397837	0.030266339141546583	Pak3/Lrrk2/Ctnnd2	3	0	glut_neurons	Homer1+
GO:0051403	stress-activated MAPK cascade	5/129	243/28564	0.00500898	0.0398916	0.0303484	Plcb1/Mapk10/Dlg1/Lrrk2/Sh3rf1	5	0	glut_neurons	Homer1+
GO:0010563	negative regulation of phosphorus metabolic process	7/129	461/28564	0.00504687	0.0398916	0.0303484	Spred2/Prkca/Atxn1/Lrrk2/Dmd/Pid1/Spred1	7	0	glut_neurons	Homer1+
GO:0045936	negative regulation of phosphate metabolic process	7/129	461/28564	0.00504687	0.0398916	0.0303484	Spred2/Prkca/Atxn1/Lrrk2/Dmd/Pid1/Spred1	7	0	glut_neurons	Homer1+
GO:0008090	retrograde axonal transport	2/129	24/28564	0.00523389	0.041055225153273235	0.0312337	Dlg2/Agbl4	2	0	glut_neurons	Homer1+
GO:0098877	neurotransmitter receptor transport to plasma membrane	2/129	24/28564	0.00523389	0.041055225153273235	0.0312337	Mapk10/Lrrc7	2	0	glut_neurons	Homer1+
GO:0001933	negative regulation of protein phosphorylation	6/129	354/28564	0.00552228	0.0431533	0.0328298	Spred2/Prkca/Lrrk2/Dmd/Pid1/Spred1	6	0	glut_neurons	Homer1+
GO:0031098	stress-activated protein kinase signaling cascade	5/129	255/28564	0.0061203	0.047518	0.036150414594348514	Plcb1/Mapk10/Dlg1/Lrrk2/Sh3rf1	5	0	glut_neurons	Homer1+
GO:0046856	phosphatidylinositol dephosphorylation	2/129	26/28564	0.0061269	0.047518	0.036150414594348514	Inpp4b/Synj2	2	0	glut_neurons	Homer1+
GO:0000041	transition metal ion transport	2024-02-05	100/28564	1.2051177157367354e-4	0.023258771913718994	0.0055816	Mt3/Fth1	2	8	glut_neurons	Homer1-
GO:0051651	maintenance of location in cell	2024-02-05	242/28564	7.029031141721935e-4	0.030064041634749364	0.00721471	Fth1/Tmsb4x	2	8	glut_neurons	Homer1-
GO:0015980	energy derivation by oxidation of organic compounds	2024-02-05	347/28564	0.00143635	0.030064041634749364	0.00721471	Mt3/Cox4i1	2	8	glut_neurons	Homer1-
GO:0051235	maintenance of location	2024-02-05	364/28564	0.00157885	0.030064041634749364	0.00721471	Fth1/Tmsb4x	2	8	glut_neurons	Homer1-
GO:0033210	leptin-mediated signaling pathway	2024-01-05	11/28564	0.00192415	0.030064041634749364	0.00721471	Mt3	1	8	glut_neurons	Homer1-
GO:0032535	regulation of cellular component size	2024-02-05	404/28564	0.00193997	0.030064041634749364	0.00721471	Mt3/Tmsb4x	2	8	glut_neurons	Homer1-
GO:0006880	intracellular sequestering of iron ion	2024-01-05	12/28564	0.00209893	0.030064041634749364	0.00721471	Fth1	1	8	glut_neurons	Homer1-
GO:0042989	sequestering of actin monomers	2024-01-05	12/28564	0.00209893	0.030064041634749364	0.00721471	Tmsb4x	1	8	glut_neurons	Homer1-
GO:0030949	positive regulation of vascular endothelial growth factor receptor signaling pathway	2024-01-05	13/28564	0.00227368	0.030064041634749364	0.00721471	Mt3	1	8	glut_neurons	Homer1-
GO:0060049	regulation of protein glycosylation	2024-01-05	13/28564	0.00227368	0.030064041634749364	0.00721471	Mt3	1	8	glut_neurons	Homer1-
GO:0097577	sequestering of iron ion	2024-01-05	14/28564	0.00244841	0.030064041634749364	0.00721471	Fth1	1	8	glut_neurons	Homer1-
GO:0051152	positive regulation of smooth muscle cell differentiation	2024-01-05	15/28564	0.00262311	0.030064041634749364	0.00721471	Tmsb4x	1	8	glut_neurons	Homer1-
GO:0006091	generation of precursor metabolites and energy	2024-02-05	478/28564	0.00270263	0.030064041634749364	0.00721471	Mt3/Cox4i1	2	8	glut_neurons	Homer1-
GO:0044320	cellular response to leptin stimulus	2024-01-05	16/28564	0.00279779	0.030064041634749364	0.00721471	Mt3	1	8	glut_neurons	Homer1-
GO:0097212	lysosomal membrane organization	2024-01-05	16/28564	0.00279779	0.030064041634749364	0.00721471	Mt3	1	8	glut_neurons	Homer1-
GO:0019430	removal of superoxide radicals	2024-01-05	18/28564	0.00314707	0.030064041634749364	0.00721471	Mt3	1	8	glut_neurons	Homer1-
GO:0071280	cellular response to copper ion	2024-01-05	18/28564	0.00314707	0.030064041634749364	0.00721471	Mt3	1	8	glut_neurons	Homer1-
GO:0006123	mitochondrial electron transport, cytochrome c to oxygen	2024-01-05	19/28564	0.00332168	0.030064041634749364	0.00721471	Cox4i1	1	8	glut_neurons	Homer1-
GO:0044321	response to leptin	2024-01-05	19/28564	0.00332168	0.030064041634749364	0.00721471	Mt3	1	8	glut_neurons	Homer1-
GO:0010310	regulation of hydrogen peroxide metabolic process	2024-01-05	20/28564	0.00349626	0.030064041634749364	0.00721471	Mt3	1	8	glut_neurons	Homer1-
GO:0071450	cellular response to oxygen radical	2024-01-05	20/28564	0.00349626	0.030064041634749364	0.00721471	Mt3	1	8	glut_neurons	Homer1-
GO:0071451	cellular response to superoxide	2024-01-05	20/28564	0.00349626	0.030064041634749364	0.00721471	Mt3	1	8	glut_neurons	Homer1-
GO:0000303	response to superoxide	2024-01-05	23/28564	0.00401985	0.030064041634749364	0.00721471	Mt3	1	8	glut_neurons	Homer1-
GO:0032095	regulation of response to food	2024-01-05	23/28564	0.00401985	0.030064041634749364	0.00721471	Mt3	1	8	glut_neurons	Homer1-
GO:0071276	cellular response to cadmium ion	2024-01-05	23/28564	0.00401985	0.030064041634749364	0.00721471	Mt3	1	8	glut_neurons	Homer1-
GO:0000305	response to oxygen radical	2024-01-05	24/28564	0.00419433	0.030064041634749364	0.00721471	Mt3	1	8	glut_neurons	Homer1-
GO:0006706	steroid catabolic process	2024-01-05	25/28564	0.00436879	0.030064041634749364	0.00721471	Mt3	1	8	glut_neurons	Homer1-
GO:0051354	negative regulation of oxidoreductase activity	2024-01-05	28/28564	0.00489202	0.030064041634749364	0.00721471	Mt3	1	8	glut_neurons	Homer1-
GO:0046688	response to copper ion	2024-01-05	29/28564	0.00506638	0.030064041634749364	0.00721471	Mt3	1	8	glut_neurons	Homer1-
GO:0042744	hydrogen peroxide catabolic process	2024-01-05	30/28564	0.00524071	0.030064041634749364	0.00721471	Mt3	1	8	glut_neurons	Homer1-
GO:0098869	cellular oxidant detoxification	2024-01-05	30/28564	0.00524071	0.030064041634749364	0.00721471	Mt3	1	8	glut_neurons	Homer1-
GO:0006829	zinc ion transport	2024-01-05	31/28564	0.00541502	0.030064041634749364	0.00721471	Mt3	1	8	glut_neurons	Homer1-
GO:0006882	intracellular zinc ion homeostasis	2024-01-05	31/28564	0.00541502	0.030064041634749364	0.00721471	Mt3	1	8	glut_neurons	Homer1-
GO:0030947	regulation of vascular endothelial growth factor receptor signaling pathway	2024-01-05	31/28564	0.00541502	0.030064041634749364	0.00721471	Mt3	1	8	glut_neurons	Homer1-
GO:0032148	activation of protein kinase B activity	2024-01-05	32/28564	0.00558931	0.030064041634749364	0.00721471	Mt3	1	8	glut_neurons	Homer1-
GO:0051150	regulation of smooth muscle cell differentiation	2024-01-05	33/28564	0.00576357	0.030064041634749364	0.00721471	Tmsb4x	1	8	glut_neurons	Homer1-
GO:0051238	sequestering of metal ion	2024-01-05	33/28564	0.00576357	0.030064041634749364	0.00721471	Fth1	1	8	glut_neurons	Homer1-
GO:0032104	regulation of response to extracellular stimulus	2024-01-05	35/28564	0.00611202	0.030246683677226334	0.00725854	Mt3	1	8	glut_neurons	Homer1-
GO:0032107	regulation of response to nutrient levels	2024-01-05	35/28564	0.00611202	0.030246683677226334	0.00725854	Mt3	1	8	glut_neurons	Homer1-
GO:0046686	response to cadmium ion	2024-01-05	36/28564	0.00628621	0.030330978831328615	0.00727877	Mt3	1	8	glut_neurons	Homer1-
GO:0014002	astrocyte development	2024-01-05	39/28564	0.00680863	0.031287293862833514	0.00750827	Mt3	1	8	glut_neurons	Homer1-
GO:0046164	alcohol catabolic process	2024-01-05	39/28564	0.00680863	0.031287293862833514	0.00750827	Mt3	1	8	glut_neurons	Homer1-
GO:0032094	response to food	2024-01-05	40/28564	0.00698273	0.031341069303268014	0.00752117	Mt3	1	8	glut_neurons	Homer1-
GO:0010559	regulation of glycoprotein biosynthetic process	2024-01-05	45/28564	0.00785282	0.033672781256810176	0.00808073	Mt3	1	8	glut_neurons	Homer1-
GO:0048147	negative regulation of fibroblast proliferation	2024-01-05	45/28564	0.00785282	0.033672781256810176	0.00808073	Fth1	1	8	glut_neurons	Homer1-
GO:1905710	positive regulation of membrane permeability	2024-01-05	46/28564	0.00802676	0.033672781256810176	0.00808073	Mt3	1	8	glut_neurons	Homer1-
GO:0030517	negative regulation of axon extension	2024-01-05	48/28564	0.00837458	0.033672781256810176	0.00808073	Mt3	1	8	glut_neurons	Homer1-
GO:0048010	vascular endothelial growth factor receptor signaling pathway	2024-01-05	48/28564	0.00837458	0.033672781256810176	0.00808073	Mt3	1	8	glut_neurons	Homer1-
GO:1903018	regulation of glycoprotein metabolic process	2024-01-05	50/28564	0.0087223	0.034355169233035256	0.00824449	Mt3	1	8	glut_neurons	Homer1-
GO:1990748	cellular detoxification	2024-01-05	53/28564	0.00924369	0.0356807	0.00856258	Mt3	1	8	glut_neurons	Homer1-
GO:2000378	negative regulation of reactive oxygen species metabolic process	2024-01-05	55/28564	0.00959117	0.036296	0.00871025	Mt3	1	8	glut_neurons	Homer1-
GO:0006826	iron ion transport	2024-01-05	57/28564	0.00993855	0.0367031	0.00880794	Fth1	1	8	glut_neurons	Homer1-
GO:0042743	hydrogen peroxide metabolic process	2024-01-05	59/28564	0.010285826044559077	0.0367031	0.00880794	Mt3	1	8	glut_neurons	Homer1-
GO:0097237	cellular response to toxic substance	2024-01-05	60/28564	0.010459429653391972	0.0367031	0.00880794	Mt3	1	8	glut_neurons	Homer1-
GO:1901616	organic hydroxy compound catabolic process	2024-01-05	60/28564	0.010459429653391972	0.0367031	0.00880794	Mt3	1	8	glut_neurons	Homer1-
GO:0019646	aerobic electron transport chain	2024-01-05	64/28564	0.011153600494368088	0.0378876	0.0090922	Cox4i1	1	8	glut_neurons	Homer1-
GO:0014911	positive regulation of smooth muscle cell migration	2024-01-05	65/28564	0.011327082318842496	0.0378876	0.0090922	Tmsb4x	1	8	glut_neurons	Homer1-
GO:0030837	negative regulation of actin filament polymerization	2024-01-05	67/28564	0.011673972922813358	0.0378876	0.0090922	Tmsb4x	1	8	glut_neurons	Homer1-
GO:0006801	superoxide metabolic process	2024-01-05	69/28564	0.012020766150566797	0.0378876	0.0090922	Mt3	1	8	glut_neurons	Homer1-
GO:0050771	negative regulation of axonogenesis	2024-01-05	70/28564	0.012194126254769122	0.0378876	0.0090922	Mt3	1	8	glut_neurons	Homer1-
GO:0006879	intracellular iron ion homeostasis	2024-01-05	71/28564	0.012367462022605524	0.0378876	0.0090922	Fth1	1	8	glut_neurons	Homer1-
GO:0032507	maintenance of protein location in cell	2024-01-05	71/28564	0.012367462022605524	0.0378876	0.0090922	Tmsb4x	1	8	glut_neurons	Homer1-
GO:0098754	detoxification	2024-01-05	71/28564	0.012367462022605524	0.0378876	0.0090922	Mt3	1	8	glut_neurons	Homer1-
GO:0010507	negative regulation of autophagy	2024-01-05	75/28564	0.013060561781533475	0.0387222	0.00929249	Mt3	1	8	glut_neurons	Homer1-
GO:0090559	regulation of membrane permeability	2024-01-05	76/28564	0.013233775905970746	0.0387222	0.00929249	Mt3	1	8	glut_neurons	Homer1-
GO:0042775	mitochondrial ATP synthesis coupled electron transport	2024-01-05	77/28564	0.013406965709413354	0.0387222	0.00929249	Cox4i1	1	8	glut_neurons	Homer1-
GO:0042773	ATP synthesis coupled electron transport	2024-01-05	79/28564	0.013753272363558944	0.0387222	0.00929249	Cox4i1	1	8	glut_neurons	Homer1-
GO:0030433	ubiquitin-dependent ERAD pathway	2024-01-05	81/28564	0.014099481764458743	0.0387222	0.00929249	Rnf121	1	8	glut_neurons	Homer1-
GO:0051149	positive regulation of muscle cell differentiation	2024-01-05	81/28564	0.014099481764458743	0.0387222	0.00929249	Tmsb4x	1	8	glut_neurons	Homer1-
GO:0043154	negative regulation of cysteine-type endopeptidase activity involved in apoptotic process	2024-01-05	82/28564	0.014272550001343087	0.0387222	0.00929249	Mt3	1	8	glut_neurons	Homer1-
GO:0051145	smooth muscle cell differentiation	2024-01-05	82/28564	0.014272550001343087	0.0387222	0.00929249	Tmsb4x	1	8	glut_neurons	Homer1-
GO:0032272	negative regulation of protein polymerization	2024-01-05	83/28564	0.014445593932597589	0.0387222	0.00929249	Tmsb4x	1	8	glut_neurons	Homer1-
GO:0007040	lysosome organization	2024-01-05	92/28564	0.016001895982921344	0.041075217378173594	0.00985716	Mt3	1	8	glut_neurons	Homer1-
GO:0080171	lytic vacuole organization	2024-01-05	92/28564	0.016001895982921344	0.041075217378173594	0.00985716	Mt3	1	8	glut_neurons	Homer1-
GO:0006112	energy reserve metabolic process	2024-01-05	93/28564	0.016174696998659033	0.041075217378173594	0.00985716	Mt3	1	8	glut_neurons	Homer1-
GO:0048708	astrocyte differentiation	2024-01-05	93/28564	0.016174696998659033	0.041075217378173594	0.00985716	Mt3	1	8	glut_neurons	Homer1-
GO:0051341	regulation of oxidoreductase activity	2024-01-05	100/28564	0.017383624482700144	0.0426539	0.010236002364392606	Mt3	1	8	glut_neurons	Homer1-
GO:0045185	maintenance of protein location	2024-01-05	101/28564	0.0175562	0.0426539	0.010236002364392606	Tmsb4x	1	8	glut_neurons	Homer1-
GO:0014910	regulation of smooth muscle cell migration	2024-01-05	102/28564	0.017728813960758205	0.0426539	0.010236002364392606	Tmsb4x	1	8	glut_neurons	Homer1-
GO:2000117	negative regulation of cysteine-type endopeptidase activity	2024-01-05	102/28564	0.017728813960758205	0.0426539	0.010236002364392606	Mt3	1	8	glut_neurons	Homer1-
GO:0022904	respiratory electron transport chain	2024-01-05	103/28564	0.0179014	0.0426539	0.010236002364392606	Cox4i1	1	8	glut_neurons	Homer1-
GO:0032147	activation of protein kinase activity	2024-01-05	105/28564	0.018246416275785604	0.0429458	0.010306063108274284	Mt3	1	8	glut_neurons	Homer1-
GO:0036503	ERAD pathway	2024-01-05	107/28564	0.0185914	0.0432305	0.010374381520532107	Rnf121	1	8	glut_neurons	Homer1-
GO:0014909	smooth muscle cell migration	2024-01-05	113/28564	0.019625622444484625	0.0444302	0.010662279357257557	Tmsb4x	1	8	glut_neurons	Homer1-
GO:0022900	electron transport chain	2024-01-05	114/28564	0.0197979	0.0444302	0.010662279357257557	Cox4i1	1	8	glut_neurons	Homer1-
GO:0030516	regulation of axon extension	2024-01-05	114/28564	0.0197979	0.0444302	0.010662279357257557	Mt3	1	8	glut_neurons	Homer1-
GO:0048145	regulation of fibroblast proliferation	2024-01-05	126/28564	0.021863526153143575	0.047464	0.011390317220924174	Fth1	1	8	glut_neurons	Homer1-
GO:0014812	muscle cell migration	2024-01-05	128/28564	0.0222075	0.047464	0.011390317220924174	Tmsb4x	1	8	glut_neurons	Homer1-
GO:0021782	glial cell development	2024-01-05	129/28564	0.022379384630656696	0.047464	0.011390317220924174	Mt3	1	8	glut_neurons	Homer1-
GO:0048640	negative regulation of developmental growth	2024-01-05	129/28564	0.022379384630656696	0.047464	0.011390317220924174	Mt3	1	8	glut_neurons	Homer1-
GO:0061387	regulation of extent of cell growth	2024-01-05	129/28564	0.022379384630656696	0.047464	0.011390317220924174	Mt3	1	8	glut_neurons	Homer1-
GO:0009636	response to toxic substance	2024-01-05	136/28564	0.0235822	0.049471371210710303	0.011872049813314718	Mt3	1	8	glut_neurons	Homer1-
GO:0000041	transition metal ion transport	2024-02-05	100/28564	1.2051177157367354e-4	0.023258771913718994	0.0055816	Mt3/Fth1	2	0	glut_neurons	Homer1-
GO:0051651	maintenance of location in cell	2024-02-05	242/28564	7.029031141721935e-4	0.030064041634749364	0.00721471	Fth1/Tmsb4x	2	0	glut_neurons	Homer1-
GO:0015980	energy derivation by oxidation of organic compounds	2024-02-05	347/28564	0.00143635	0.030064041634749364	0.00721471	Mt3/Cox4i1	2	0	glut_neurons	Homer1-
GO:0051235	maintenance of location	2024-02-05	364/28564	0.00157885	0.030064041634749364	0.00721471	Fth1/Tmsb4x	2	0	glut_neurons	Homer1-
GO:0033210	leptin-mediated signaling pathway	2024-01-05	11/28564	0.00192415	0.030064041634749364	0.00721471	Mt3	1	0	glut_neurons	Homer1-
GO:0032535	regulation of cellular component size	2024-02-05	404/28564	0.00193997	0.030064041634749364	0.00721471	Mt3/Tmsb4x	2	0	glut_neurons	Homer1-
GO:0006880	intracellular sequestering of iron ion	2024-01-05	12/28564	0.00209893	0.030064041634749364	0.00721471	Fth1	1	0	glut_neurons	Homer1-
GO:0042989	sequestering of actin monomers	2024-01-05	12/28564	0.00209893	0.030064041634749364	0.00721471	Tmsb4x	1	0	glut_neurons	Homer1-
GO:0030949	positive regulation of vascular endothelial growth factor receptor signaling pathway	2024-01-05	13/28564	0.00227368	0.030064041634749364	0.00721471	Mt3	1	0	glut_neurons	Homer1-
GO:0060049	regulation of protein glycosylation	2024-01-05	13/28564	0.00227368	0.030064041634749364	0.00721471	Mt3	1	0	glut_neurons	Homer1-
GO:0097577	sequestering of iron ion	2024-01-05	14/28564	0.00244841	0.030064041634749364	0.00721471	Fth1	1	0	glut_neurons	Homer1-
GO:0051152	positive regulation of smooth muscle cell differentiation	2024-01-05	15/28564	0.00262311	0.030064041634749364	0.00721471	Tmsb4x	1	0	glut_neurons	Homer1-
GO:0006091	generation of precursor metabolites and energy	2024-02-05	478/28564	0.00270263	0.030064041634749364	0.00721471	Mt3/Cox4i1	2	0	glut_neurons	Homer1-
GO:0044320	cellular response to leptin stimulus	2024-01-05	16/28564	0.00279779	0.030064041634749364	0.00721471	Mt3	1	0	glut_neurons	Homer1-
GO:0097212	lysosomal membrane organization	2024-01-05	16/28564	0.00279779	0.030064041634749364	0.00721471	Mt3	1	0	glut_neurons	Homer1-
GO:0019430	removal of superoxide radicals	2024-01-05	18/28564	0.00314707	0.030064041634749364	0.00721471	Mt3	1	0	glut_neurons	Homer1-
GO:0071280	cellular response to copper ion	2024-01-05	18/28564	0.00314707	0.030064041634749364	0.00721471	Mt3	1	0	glut_neurons	Homer1-
GO:0006123	mitochondrial electron transport, cytochrome c to oxygen	2024-01-05	19/28564	0.00332168	0.030064041634749364	0.00721471	Cox4i1	1	0	glut_neurons	Homer1-
GO:0044321	response to leptin	2024-01-05	19/28564	0.00332168	0.030064041634749364	0.00721471	Mt3	1	0	glut_neurons	Homer1-
GO:0010310	regulation of hydrogen peroxide metabolic process	2024-01-05	20/28564	0.00349626	0.030064041634749364	0.00721471	Mt3	1	0	glut_neurons	Homer1-
GO:0071450	cellular response to oxygen radical	2024-01-05	20/28564	0.00349626	0.030064041634749364	0.00721471	Mt3	1	0	glut_neurons	Homer1-
GO:0071451	cellular response to superoxide	2024-01-05	20/28564	0.00349626	0.030064041634749364	0.00721471	Mt3	1	0	glut_neurons	Homer1-
GO:0000303	response to superoxide	2024-01-05	23/28564	0.00401985	0.030064041634749364	0.00721471	Mt3	1	0	glut_neurons	Homer1-
GO:0032095	regulation of response to food	2024-01-05	23/28564	0.00401985	0.030064041634749364	0.00721471	Mt3	1	0	glut_neurons	Homer1-
GO:0071276	cellular response to cadmium ion	2024-01-05	23/28564	0.00401985	0.030064041634749364	0.00721471	Mt3	1	0	glut_neurons	Homer1-
GO:0000305	response to oxygen radical	2024-01-05	24/28564	0.00419433	0.030064041634749364	0.00721471	Mt3	1	0	glut_neurons	Homer1-
GO:0006706	steroid catabolic process	2024-01-05	25/28564	0.00436879	0.030064041634749364	0.00721471	Mt3	1	0	glut_neurons	Homer1-
GO:0051354	negative regulation of oxidoreductase activity	2024-01-05	28/28564	0.00489202	0.030064041634749364	0.00721471	Mt3	1	0	glut_neurons	Homer1-
GO:0046688	response to copper ion	2024-01-05	29/28564	0.00506638	0.030064041634749364	0.00721471	Mt3	1	0	glut_neurons	Homer1-
GO:0042744	hydrogen peroxide catabolic process	2024-01-05	30/28564	0.00524071	0.030064041634749364	0.00721471	Mt3	1	0	glut_neurons	Homer1-
GO:0098869	cellular oxidant detoxification	2024-01-05	30/28564	0.00524071	0.030064041634749364	0.00721471	Mt3	1	0	glut_neurons	Homer1-
GO:0006829	zinc ion transport	2024-01-05	31/28564	0.00541502	0.030064041634749364	0.00721471	Mt3	1	0	glut_neurons	Homer1-
GO:0006882	intracellular zinc ion homeostasis	2024-01-05	31/28564	0.00541502	0.030064041634749364	0.00721471	Mt3	1	0	glut_neurons	Homer1-
GO:0030947	regulation of vascular endothelial growth factor receptor signaling pathway	2024-01-05	31/28564	0.00541502	0.030064041634749364	0.00721471	Mt3	1	0	glut_neurons	Homer1-
GO:0032148	activation of protein kinase B activity	2024-01-05	32/28564	0.00558931	0.030064041634749364	0.00721471	Mt3	1	0	glut_neurons	Homer1-
GO:0051150	regulation of smooth muscle cell differentiation	2024-01-05	33/28564	0.00576357	0.030064041634749364	0.00721471	Tmsb4x	1	0	glut_neurons	Homer1-
GO:0051238	sequestering of metal ion	2024-01-05	33/28564	0.00576357	0.030064041634749364	0.00721471	Fth1	1	0	glut_neurons	Homer1-
GO:0032104	regulation of response to extracellular stimulus	2024-01-05	35/28564	0.00611202	0.030246683677226334	0.00725854	Mt3	1	0	glut_neurons	Homer1-
GO:0032107	regulation of response to nutrient levels	2024-01-05	35/28564	0.00611202	0.030246683677226334	0.00725854	Mt3	1	0	glut_neurons	Homer1-
GO:0046686	response to cadmium ion	2024-01-05	36/28564	0.00628621	0.030330978831328615	0.00727877	Mt3	1	0	glut_neurons	Homer1-
GO:0014002	astrocyte development	2024-01-05	39/28564	0.00680863	0.031287293862833514	0.00750827	Mt3	1	0	glut_neurons	Homer1-
GO:0046164	alcohol catabolic process	2024-01-05	39/28564	0.00680863	0.031287293862833514	0.00750827	Mt3	1	0	glut_neurons	Homer1-
GO:0032094	response to food	2024-01-05	40/28564	0.00698273	0.031341069303268014	0.00752117	Mt3	1	0	glut_neurons	Homer1-
GO:0010559	regulation of glycoprotein biosynthetic process	2024-01-05	45/28564	0.00785282	0.033672781256810176	0.00808073	Mt3	1	0	glut_neurons	Homer1-
GO:0048147	negative regulation of fibroblast proliferation	2024-01-05	45/28564	0.00785282	0.033672781256810176	0.00808073	Fth1	1	0	glut_neurons	Homer1-
GO:1905710	positive regulation of membrane permeability	2024-01-05	46/28564	0.00802676	0.033672781256810176	0.00808073	Mt3	1	0	glut_neurons	Homer1-
GO:0030517	negative regulation of axon extension	2024-01-05	48/28564	0.00837458	0.033672781256810176	0.00808073	Mt3	1	0	glut_neurons	Homer1-
GO:0048010	vascular endothelial growth factor receptor signaling pathway	2024-01-05	48/28564	0.00837458	0.033672781256810176	0.00808073	Mt3	1	0	glut_neurons	Homer1-
GO:1903018	regulation of glycoprotein metabolic process	2024-01-05	50/28564	0.0087223	0.034355169233035256	0.00824449	Mt3	1	0	glut_neurons	Homer1-
GO:1990748	cellular detoxification	2024-01-05	53/28564	0.00924369	0.0356807	0.00856258	Mt3	1	0	glut_neurons	Homer1-
GO:2000378	negative regulation of reactive oxygen species metabolic process	2024-01-05	55/28564	0.00959117	0.036296	0.00871025	Mt3	1	0	glut_neurons	Homer1-
GO:0006826	iron ion transport	2024-01-05	57/28564	0.00993855	0.0367031	0.00880794	Fth1	1	0	glut_neurons	Homer1-
GO:0042743	hydrogen peroxide metabolic process	2024-01-05	59/28564	0.010285826044559077	0.0367031	0.00880794	Mt3	1	0	glut_neurons	Homer1-
GO:0097237	cellular response to toxic substance	2024-01-05	60/28564	0.010459429653391972	0.0367031	0.00880794	Mt3	1	0	glut_neurons	Homer1-
GO:1901616	organic hydroxy compound catabolic process	2024-01-05	60/28564	0.010459429653391972	0.0367031	0.00880794	Mt3	1	0	glut_neurons	Homer1-
GO:0019646	aerobic electron transport chain	2024-01-05	64/28564	0.011153600494368088	0.0378876	0.0090922	Cox4i1	1	0	glut_neurons	Homer1-
GO:0014911	positive regulation of smooth muscle cell migration	2024-01-05	65/28564	0.011327082318842496	0.0378876	0.0090922	Tmsb4x	1	0	glut_neurons	Homer1-
GO:0030837	negative regulation of actin filament polymerization	2024-01-05	67/28564	0.011673972922813358	0.0378876	0.0090922	Tmsb4x	1	0	glut_neurons	Homer1-
GO:0006801	superoxide metabolic process	2024-01-05	69/28564	0.012020766150566797	0.0378876	0.0090922	Mt3	1	0	glut_neurons	Homer1-
GO:0050771	negative regulation of axonogenesis	2024-01-05	70/28564	0.012194126254769122	0.0378876	0.0090922	Mt3	1	0	glut_neurons	Homer1-
GO:0006879	intracellular iron ion homeostasis	2024-01-05	71/28564	0.012367462022605524	0.0378876	0.0090922	Fth1	1	0	glut_neurons	Homer1-
GO:0032507	maintenance of protein location in cell	2024-01-05	71/28564	0.012367462022605524	0.0378876	0.0090922	Tmsb4x	1	0	glut_neurons	Homer1-
GO:0098754	detoxification	2024-01-05	71/28564	0.012367462022605524	0.0378876	0.0090922	Mt3	1	0	glut_neurons	Homer1-
GO:0010507	negative regulation of autophagy	2024-01-05	75/28564	0.013060561781533475	0.0387222	0.00929249	Mt3	1	0	glut_neurons	Homer1-
GO:0090559	regulation of membrane permeability	2024-01-05	76/28564	0.013233775905970746	0.0387222	0.00929249	Mt3	1	0	glut_neurons	Homer1-
GO:0042775	mitochondrial ATP synthesis coupled electron transport	2024-01-05	77/28564	0.013406965709413354	0.0387222	0.00929249	Cox4i1	1	0	glut_neurons	Homer1-
GO:0042773	ATP synthesis coupled electron transport	2024-01-05	79/28564	0.013753272363558944	0.0387222	0.00929249	Cox4i1	1	0	glut_neurons	Homer1-
GO:0030433	ubiquitin-dependent ERAD pathway	2024-01-05	81/28564	0.014099481764458743	0.0387222	0.00929249	Rnf121	1	0	glut_neurons	Homer1-
GO:0051149	positive regulation of muscle cell differentiation	2024-01-05	81/28564	0.014099481764458743	0.0387222	0.00929249	Tmsb4x	1	0	glut_neurons	Homer1-
GO:0043154	negative regulation of cysteine-type endopeptidase activity involved in apoptotic process	2024-01-05	82/28564	0.014272550001343087	0.0387222	0.00929249	Mt3	1	0	glut_neurons	Homer1-
GO:0051145	smooth muscle cell differentiation	2024-01-05	82/28564	0.014272550001343087	0.0387222	0.00929249	Tmsb4x	1	0	glut_neurons	Homer1-
GO:0032272	negative regulation of protein polymerization	2024-01-05	83/28564	0.014445593932597589	0.0387222	0.00929249	Tmsb4x	1	0	glut_neurons	Homer1-
GO:0007040	lysosome organization	2024-01-05	92/28564	0.016001895982921344	0.041075217378173594	0.00985716	Mt3	1	0	glut_neurons	Homer1-
GO:0080171	lytic vacuole organization	2024-01-05	92/28564	0.016001895982921344	0.041075217378173594	0.00985716	Mt3	1	0	glut_neurons	Homer1-
GO:0006112	energy reserve metabolic process	2024-01-05	93/28564	0.016174696998659033	0.041075217378173594	0.00985716	Mt3	1	0	glut_neurons	Homer1-
GO:0048708	astrocyte differentiation	2024-01-05	93/28564	0.016174696998659033	0.041075217378173594	0.00985716	Mt3	1	0	glut_neurons	Homer1-
GO:0051341	regulation of oxidoreductase activity	2024-01-05	100/28564	0.017383624482700144	0.0426539	0.010236002364392606	Mt3	1	0	glut_neurons	Homer1-
GO:0045185	maintenance of protein location	2024-01-05	101/28564	0.0175562	0.0426539	0.010236002364392606	Tmsb4x	1	0	glut_neurons	Homer1-
GO:0014910	regulation of smooth muscle cell migration	2024-01-05	102/28564	0.017728813960758205	0.0426539	0.010236002364392606	Tmsb4x	1	0	glut_neurons	Homer1-
GO:2000117	negative regulation of cysteine-type endopeptidase activity	2024-01-05	102/28564	0.017728813960758205	0.0426539	0.010236002364392606	Mt3	1	0	glut_neurons	Homer1-
GO:0022904	respiratory electron transport chain	2024-01-05	103/28564	0.0179014	0.0426539	0.010236002364392606	Cox4i1	1	0	glut_neurons	Homer1-
GO:0032147	activation of protein kinase activity	2024-01-05	105/28564	0.018246416275785604	0.0429458	0.010306063108274284	Mt3	1	0	glut_neurons	Homer1-
GO:0036503	ERAD pathway	2024-01-05	107/28564	0.0185914	0.0432305	0.010374381520532107	Rnf121	1	0	glut_neurons	Homer1-
GO:0014909	smooth muscle cell migration	2024-01-05	113/28564	0.019625622444484625	0.0444302	0.010662279357257557	Tmsb4x	1	0	glut_neurons	Homer1-
GO:0022900	electron transport chain	2024-01-05	114/28564	0.0197979	0.0444302	0.010662279357257557	Cox4i1	1	0	glut_neurons	Homer1-
GO:0030516	regulation of axon extension	2024-01-05	114/28564	0.0197979	0.0444302	0.010662279357257557	Mt3	1	0	glut_neurons	Homer1-
GO:0048145	regulation of fibroblast proliferation	2024-01-05	126/28564	0.021863526153143575	0.047464	0.011390317220924174	Fth1	1	0	glut_neurons	Homer1-
GO:0014812	muscle cell migration	2024-01-05	128/28564	0.0222075	0.047464	0.011390317220924174	Tmsb4x	1	0	glut_neurons	Homer1-
GO:0021782	glial cell development	2024-01-05	129/28564	0.022379384630656696	0.047464	0.011390317220924174	Mt3	1	0	glut_neurons	Homer1-
GO:0048640	negative regulation of developmental growth	2024-01-05	129/28564	0.022379384630656696	0.047464	0.011390317220924174	Mt3	1	0	glut_neurons	Homer1-
GO:0061387	regulation of extent of cell growth	2024-01-05	129/28564	0.022379384630656696	0.047464	0.011390317220924174	Mt3	1	0	glut_neurons	Homer1-
GO:0009636	response to toxic substance	2024-01-05	136/28564	0.0235822	0.049471371210710303	0.011872049813314718	Mt3	1	0	glut_neurons	Homer1-
GO:0048741	skeletal muscle fiber development	2024-03-27	48/28564	1.26617739752284e-5	0.00556613	0.00328256	Homer1/Lncpint/Hdac9	3	3	gaba_neurons	Homer1+
GO:0014904	myotube cell development	2024-03-27	54/28564	1.808960011748337e-5	0.00556613	0.00328256	Homer1/Lncpint/Hdac9	3	3	gaba_neurons	Homer1+
GO:0099171	presynaptic modulation of chemical synaptic transmission	2024-03-27	61/28564	2.6132083048335505e-5	0.00556613	0.00328256	Prkca/Chrm2/Dgki	3	3	gaba_neurons	Homer1+
GO:0099601	regulation of neurotransmitter receptor activity	2024-03-27	72/28564	4.3005186283578575e-5	0.00674836	0.00397976	Homer1/Dlgap1/Grip1	3	3	gaba_neurons	Homer1+
GO:0051965	positive regulation of synapse assembly	2024-03-27	80/28564	5.8946168740323466e-5	0.00674836	0.00397976	Ntrk2/Prkca/Lrrtm4	3	3	gaba_neurons	Homer1+
GO:0140059	dendrite arborization	2024-02-27	13/28564	6.668391150026025e-5	0.00674836	0.00397976	Phactr1/Grip1	2	3	gaba_neurons	Homer1+
GO:0051966	regulation of synaptic transmission, glutamatergic	2024-03-27	88/28564	7.833511613767604e-5	0.00674836	0.00397976	Homer1/Ntrk2/Dgki	3	3	gaba_neurons	Homer1+
GO:0010632	regulation of epithelial cell migration	2024-04-27	249/28564	8.448655832986853e-5	0.00674836	0.00397976	Arhgap5/Prkca/Ptprm/Hdac9	4	3	gaba_neurons	Homer1+
GO:0035418	protein localization to synapse	2024-03-27	100/28564	1.1456084184009002e-4	0.00813382	0.00479682	Homer1/Dlgap1/Grip1	3	3	gaba_neurons	Homer1+
GO:0050807	regulation of synapse organization	2024-04-27	305/28564	1.8426697530564193e-4	0.00893685	0.00527039	Homer1/Ntrk2/Prkca/Lrrtm4	4	3	gaba_neurons	Homer1+
GO:0061448	connective tissue development	2024-04-27	307/28564	1.8892860937387655e-4	0.00893685	0.00527039	Lncpint/Rasal2/Prkca/Trps1	4	3	gaba_neurons	Homer1+
GO:0050803	regulation of synapse structure or activity	2024-04-27	313/28564	2.0342554382211023e-4	0.00893685	0.00527039	Homer1/Ntrk2/Prkca/Lrrtm4	4	3	gaba_neurons	Homer1+
GO:0098962	regulation of postsynaptic neurotransmitter receptor activity	2024-02-27	23/28564	2.1503733345742994e-4	0.00893685	0.00527039	Homer1/Dlgap1	2	3	gaba_neurons	Homer1+
GO:0035249	synaptic transmission, glutamatergic	2024-03-27	127/28564	2.322088148618875e-4	0.00893685	0.00527039	Homer1/Ntrk2/Dgki	3	3	gaba_neurons	Homer1+
GO:1901890	positive regulation of cell junction assembly	2024-03-27	127/28564	2.322088148618875e-4	0.00893685	0.00527039	Ntrk2/Prkca/Lrrtm4	3	3	gaba_neurons	Homer1+
GO:0010631	epithelial cell migration	2024-04-27	327/28564	2.4035773712074892e-4	0.00893685	0.00527039	Arhgap5/Prkca/Ptprm/Hdac9	4	3	gaba_neurons	Homer1+
GO:0090132	epithelium migration	2024-04-27	329/28564	2.460024673670528e-4	0.00893685	0.00527039	Arhgap5/Prkca/Ptprm/Hdac9	4	3	gaba_neurons	Homer1+
GO:0090130	tissue migration	2024-04-27	331/28564	2.517422036754097e-4	0.00893685	0.00527039	Arhgap5/Prkca/Ptprm/Hdac9	4	3	gaba_neurons	Homer1+
GO:1902414	protein localization to cell junction	2024-03-27	133/28564	2.659815985097143e-4	0.00894538	0.00527542	Homer1/Dlgap1/Grip1	3	3	gaba_neurons	Homer1+
GO:0051963	regulation of synapse assembly	2024-03-27	140/28564	3.092173511999867e-4	0.00987949	0.00582631	Ntrk2/Prkca/Lrrtm4	3	3	gaba_neurons	Homer1+
GO:0014902	myotube differentiation	2024-03-27	144/28564	3.3584267231787475e-4	0.0102192	0.00602665	Homer1/Lncpint/Hdac9	3	3	gaba_neurons	Homer1+
GO:0010469	regulation of signaling receptor activity	2024-03-27	149/28564	3.711489652771988e-4	0.010780190400551365	0.00635748	Homer1/Dlgap1/Grip1	3	3	gaba_neurons	Homer1+
GO:0051962	positive regulation of nervous system development	2024-04-27	379/28564	4.204982159136631e-4	0.011682537389949161	0.00688963	Ntrk2/Grip1/Prkca/Lrrtm4	4	3	gaba_neurons	Homer1+
GO:0140058	neuron projection arborization	2024-02-27	33/28564	4.4616483884430346e-4	0.0118791	0.00700557	Phactr1/Grip1	2	3	gaba_neurons	Homer1+
GO:0010634	positive regulation of epithelial cell migration	2024-03-27	162/28564	4.7390635435813345e-4	0.012113	0.00714351	Arhgap5/Prkca/Hdac9	3	3	gaba_neurons	Homer1+
GO:0007269	neurotransmitter secretion	2024-03-27	169/28564	5.360831911389638e-4	0.012687302190288812	0.00748217	Ntrk2/Prkca/Dgki	3	3	gaba_neurons	Homer1+
GO:0099643	signal release from synapse	2024-03-27	169/28564	5.360831911389638e-4	0.012687302190288812	0.00748217	Ntrk2/Prkca/Dgki	3	3	gaba_neurons	Homer1+
GO:0010594	regulation of endothelial cell migration	2024-03-27	177/28564	6.132801609193951e-4	0.013683365080282289	0.00806959	Prkca/Ptprm/Hdac9	3	3	gaba_neurons	Homer1+
GO:1990089	response to nerve growth factor	2024-02-27	40/28564	6.564239012879822e-4	0.013683365080282289	0.00806959	Ntrk2/Grip1	2	3	gaba_neurons	Homer1+
GO:1990090	cellular response to nerve growth factor stimulus	2024-02-27	40/28564	6.564239012879822e-4	0.013683365080282289	0.00806959	Ntrk2/Grip1	2	3	gaba_neurons	Homer1+
GO:0007264	small GTPase mediated signal transduction	2024-04-27	428/28564	6.638252229870906e-4	0.013683365080282289	0.00806959	Arhgap5/Arhgap26/Elmo1/Dgki	4	3	gaba_neurons	Homer1+
GO:0001667	ameboidal-type cell migration	2024-04-27	470/28564	9.40712429716913e-4	0.018784851330909607	0.011078126639429437	Arhgap5/Prkca/Ptprm/Hdac9	4	3	gaba_neurons	Homer1+
GO:0007215	glutamate receptor signaling pathway	2024-02-27	49/28564	9.845100454223819e-4	0.019063694515906122	0.011242570853627199	Homer1/Grip1	2	3	gaba_neurons	Homer1+
GO:0007519	skeletal muscle tissue development	2024-03-27	211/28564	0.00101977	0.019165608992554543	0.011302673617221856	Homer1/Lncpint/Hdac9	3	3	gaba_neurons	Homer1+
GO:0007416	synapse assembly	2024-03-27	216/28564	0.00109092	0.019779412765195997	0.011664656568553113	Ntrk2/Prkca/Lrrtm4	3	3	gaba_neurons	Homer1+
GO:0034765	regulation of monoatomic ion transmembrane transport	2024-04-27	492/28564	0.00111433	0.019779412765195997	0.011664656568553113	Homer1/Grip1/Prkca/Kcnh8	4	3	gaba_neurons	Homer1+
GO:0007409	axonogenesis	2024-04-27	498/28564	0.00116535	0.020100351936833048	0.011853926354313865	Ntrk2/Prkca/Ptprm/Epha6	4	3	gaba_neurons	Homer1+
GO:0060538	skeletal muscle organ development	2024-03-27	224/28564	0.00121119	0.020100351936833048	0.011853926354313865	Homer1/Lncpint/Hdac9	3	3	gaba_neurons	Homer1+
GO:0006836	neurotransmitter transport	2024-03-27	225/28564	0.00122678	0.020100351936833048	0.011853926354313865	Ntrk2/Prkca/Dgki	3	3	gaba_neurons	Homer1+
GO:0043542	endothelial cell migration	2024-03-27	230/28564	0.00130667	0.0208741	0.012310205578959267	Prkca/Ptprm/Hdac9	3	3	gaba_neurons	Homer1+
GO:0043536	positive regulation of blood vessel endothelial cell migration	2024-02-27	58/28564	0.00137661	0.021144369048900255	0.012469622139043396	Prkca/Hdac9	2	3	gaba_neurons	Homer1+
GO:0055001	muscle cell development	2024-03-27	235/28564	0.00138977	0.021144369048900255	0.012469622139043396	Homer1/Lncpint/Hdac9	3	3	gaba_neurons	Homer1+
GO:0001505	regulation of neurotransmitter levels	2024-03-27	242/28564	0.0015116	0.021952585586170293	0.012946257540316227	Ntrk2/Prkca/Dgki	3	3	gaba_neurons	Homer1+
GO:1901888	regulation of cell junction assembly	2024-03-27	242/28564	0.0015116	0.021952585586170293	0.012946257540316227	Ntrk2/Prkca/Lrrtm4	3	3	gaba_neurons	Homer1+
GO:0060612	adipose tissue development	2024-02-27	68/28564	0.00188609	0.026782505279529186	0.0157946	Lncpint/Rasal2	2	3	gaba_neurons	Homer1+
GO:0019933	cAMP-mediated signaling	2024-02-27	69/28564	0.00194126	0.0269667	0.015903255172940407	Pde10a/Pde7b	2	3	gaba_neurons	Homer1+
GO:0032412	regulation of monoatomic ion transmembrane transporter activity	2024-03-27	290/28564	0.00252926	0.034387158037621546	0.0202794	Homer1/Grip1/Prkca	3	3	gaba_neurons	Homer1+
GO:0019932	second-messenger-mediated signaling	2024-03-27	295/28564	0.00265448	0.035337736616837284	0.020839979752619635	Pde10a/Ntrk2/Pde7b	3	3	gaba_neurons	Homer1+
GO:0060042	retina morphogenesis in camera-type eye	2024-02-27	82/28564	0.00272735	0.0355669	0.020975126314065402	Ntrk2/Ptprm	2	3	gaba_neurons	Homer1+
GO:0022898	regulation of transmembrane transporter activity	2024-03-27	303/28564	0.00286271	0.0365855	0.0215758	Homer1/Grip1/Prkca	3	3	gaba_neurons	Homer1+
GO:0032413	negative regulation of ion transmembrane transporter activity	2024-02-27	85/28564	0.00292673	0.0366702	0.0216258	Grip1/Prkca	2	3	gaba_neurons	Homer1+
GO:0003407	neural retina development	2024-02-27	86/28564	0.00299467	0.0367999	0.0217023	Ntrk2/Ptprm	2	3	gaba_neurons	Homer1+
GO:0032409	regulation of transporter activity	2024-03-27	317/28564	0.0032509	0.038811	0.022888315726988667	Homer1/Grip1/Prkca	3	3	gaba_neurons	Homer1+
GO:0006936	muscle contraction	2024-03-27	318/28564	0.00327981	0.038811	0.022888315726988667	Homer1/Prkca/Chrm2	3	3	gaba_neurons	Homer1+
GO:0007611	learning or memory	2024-03-27	326/28564	0.00351675	0.039962215844734715	0.023567207433349856	Ntrk2/Prkca/Dgki	3	3	gaba_neurons	Homer1+
GO:0016358	dendrite development	2024-03-27	327/28564	0.00354709	0.039962215844734715	0.023567207433349856	Ntrk2/Phactr1/Grip1	3	3	gaba_neurons	Homer1+
GO:0032410	negative regulation of transporter activity	2024-02-27	94/28564	0.0035647	0.039962215844734715	0.023567207433349856	Grip1/Prkca	2	3	gaba_neurons	Homer1+
GO:0043535	regulation of blood vessel endothelial cell migration	2024-02-27	96/28564	0.00371452	0.0409238	0.024134275036324936	Prkca/Hdac9	2	3	gaba_neurons	Homer1+
GO:0007265	Ras protein signal transduction	2024-03-27	340/28564	0.00395619	0.042141	0.0248521	Arhgap5/Elmo1/Dgki	3	3	gaba_neurons	Homer1+
GO:0051146	striated muscle cell differentiation	2024-03-27	342/28564	0.00402158	0.042141	0.0248521	Homer1/Lncpint/Hdac9	3	3	gaba_neurons	Homer1+
GO:0021954	central nervous system neuron development	2024-02-27	100/28564	0.00402285	0.042141	0.0248521	Ntrk2/Prkca	2	3	gaba_neurons	Homer1+
GO:0019935	cyclic-nucleotide-mediated signaling	2024-02-27	102/28564	0.00418134	0.0430948	0.025414599354816117	Pde10a/Pde7b	2	3	gaba_neurons	Homer1+
GO:0046928	regulation of neurotransmitter secretion	2024-02-27	104/28564	0.0043427	0.0440474	0.0259764	Ntrk2/Prkca	2	3	gaba_neurons	Homer1+
GO:0050890	cognition	2024-03-27	364/28564	0.0047848	0.0477733	0.028173670841066836	Ntrk2/Prkca/Dgki	3	3	gaba_neurons	Homer1+
GO:0010595	positive regulation of endothelial cell migration	2024-02-27	111/28564	0.00492992	0.0484649	0.0285815	Prkca/Hdac9	2	3	gaba_neurons	Homer1+

## Sheet: Table_S11_glut_ME_gene_assign
gene_name	module	color	kME_turquoise	kME_grey	kME_yellow	kME_green	kME_blue	kME_brown
Xkr4	turquoise	turquoise	0.20433860490437042	0.00441457	0.20073594888071994	0.0892304	-0.0982574	-0.151461
Gm1992	turquoise	turquoise	0.20497173080423325	0.0129701	0.20679948353500277	0.0535188	-0.0128275	-0.156629
Gm19938	turquoise	turquoise	0.12862606203487775	0.00503317	0.12829664791352932	0.0319765	-0.0340057	-0.116313
Rgs20	turquoise	turquoise	0.015095199991848024	-0.0169939	-0.0301341	-0.00396418	-0.00893998	0.00787381
Atp6v1h	turquoise	turquoise	0.0534535	-0.000440453	0.0421347	-0.0161476	0.00268339	-0.0296601
Oprk1	yellow	yellow	-0.0419139	0.16525656075848738	0.1891162528669215	0.038322	0.0124377	0.027197093382260156
4732440D04Rik	turquoise	turquoise	0.00599547	0.1015028801446376	0.0830868	0.0555267	-0.00652086	0.020111873681055284
Rb1cc1	turquoise	turquoise	0.0644282	4.6144357210393933e-4	0.025506675779610962	0.012636302055584239	-0.00292075	-0.0159843
Pcmtd1	turquoise	turquoise	0.10915247168866127	-0.0934703	-0.0169097	0.00813344	0.0203958	-0.0914592
Sntg1	brown	brown	-0.00810845	0.026960466688962535	0.0255779	-0.0442349	-0.0667498	0.1069915884919919
2610203C22Rik	green	green	0.053641	0.13700119369308186	0.13812234554442346	0.34955796297543384	0.018167852469047934	-0.110656
Vxn	green	green	0.066649	0.1825102130339178	0.18844587637316565	0.40297029088522346	0.0310748	-0.146678
Sgk3	turquoise	turquoise	0.1759145398253504	-0.0911377	0.023385431610882985	0.0651516	0.00842129	-0.161809
Snhg6	turquoise	turquoise	0.14020191806370572	-0.0443991	0.0482593	0.0704707	0.0327395	-0.120895
Cspp1	turquoise	turquoise	0.0399826	-0.0295614	-0.018145	0.00763713	0.00322487	0.00290291
Arfgef1	brown	brown	-0.0116017	-0.0102228	-0.0240132	-0.0347659	0.0147404	0.0599796
A830018L16Rik	yellow	yellow	0.23846098525258605	0.12428890365580257	0.35094285865217073	0.2169953170315477	-0.02145	-0.240026
Sulf1	green	green	-0.0936595	0.0743811	-0.0318623	0.32333783706132124	-0.0107174	0.1082699281160565
Ncoa2	turquoise	turquoise	0.0329963	-0.0716768	-0.068846	-0.0124987	-0.0319412	0.015108489328182814
Lactb2	turquoise	turquoise	0.0416457	-0.0111216	0.022867034439300923	0.0641015	-0.000708935	-0.049962
Kcnb2	brown	brown	-0.0304073	0.0594427	0.00164406	-0.00985956	-0.0503495	0.0786284
Rpl7	blue	blue	-0.0175274	-0.0210842	-0.0261462	0.0180361	0.14934496022728339	0.0042301
Stau2	turquoise	turquoise	0.00424499	-0.000924091	-0.0230509	-0.00282768	-0.0343552	0.074574
Ube2w	turquoise	turquoise	0.049569709724794575	-0.0191417	-0.00122427	0.00938964	-0.00401311	-0.0150243
Gm28376	turquoise	turquoise	0.40495998990450033	-0.0752606	0.21722228854187395	0.0616654	0.057791702898796565	-0.374651
Jph1	turquoise	turquoise	0.2200325767071236	-0.0584081	0.10157635371907181	0.032345	0.033441356229313726	-0.211674
Tfap2d	yellow	yellow	0.0972978	0.13004077514597676	0.2715514980188064	-0.0212318	-0.00390665	-0.118494
Kcnq5	turquoise	turquoise	0.27892293402432433	-0.0278477	0.14951149396148267	0.019022171880521018	-0.00274713	-0.292321
Rims1	turquoise	turquoise	0.2512410966584372	-0.183396	-0.0111798	0.0560835	-0.0335799	-0.191594
Smap1	turquoise	turquoise	0.0332242	0.0910365	0.0996485	0.046850690410043944	0.023870119669569315	-0.0170764
Lmbrd1	turquoise	turquoise	0.021568443964421348	0.020876067796543777	0.011451891727404514	0.0550522	-0.00277399	-0.0176473
Adgrb3	turquoise	turquoise	0.14772421944929184	0.062086	0.10727087132144099	0.1781	-0.0901777	-0.030711
Phf3	turquoise	turquoise	0.016501265146995424	0.00657756	0.00670029	0.00182997	-0.00372569	0.0335342
Dst	green	green	-0.0379729	0.0781174	0.026839214928834555	0.0947485	-0.0271122	0.0905658
Lman2l	turquoise	turquoise	0.092357	-0.0498991	0.025134399915125977	0.014612530691028766	0.00562478	-0.0505307
Cox5b	blue	blue	-0.00395608	-0.0110885	-0.0172928	-0.00686582	0.15290037656611152	0.00377253
Inpp4a	turquoise	turquoise	0.017804183231961285	0.028290168502942133	0.017168497242114437	0.0555982	-0.0270812	0.023247622690636658
Cracdl	turquoise	turquoise	0.2969534637095939	-0.329541	-0.1022	-0.142311	0.026876863643923634	-0.236619
Tsga10	turquoise	turquoise	0.1627116899301921	-0.117445	0.023557274745443335	-0.0364004	-0.030906	-0.130655
Mrpl30	blue	blue	0.00947506	-0.00440792	0.011960589309829225	-0.0101531	0.0878317	-0.0145683
Eif5b	turquoise	turquoise	0.00766921	0.013472272197164131	0.012216379719851742	0.00307094	0.0299899	0.020227023123439634
Rev1	turquoise	turquoise	0.020537056395048475	-0.00553542	-0.0225365	0.00787026	-0.0346607	0.036591060988455625
Aff3	yellow	yellow	0.17635437146165037	0.10381301158917591	0.25213882999360127	0.00550001	-0.0345531	-0.106533
Npas2	turquoise	turquoise	0.19411512283239668	0.0689298	0.20271142685190952	0.1546736852323488	-0.0129487	-0.19258
Rpl31	blue	blue	-0.0195019	0.00447416	-0.0109785	0.028936283798022887	0.11735009105365532	3.368045471205046e-4
Map4k4	yellow	yellow	0.030072011133391068	0.0641157	0.10124400898410725	-0.045057	-0.0204058	0.00583787
Gpr45	turquoise	turquoise	0.027582790285376895	0.0854516	0.10131672033955198	0.10757007750101241	-0.0201274	-0.053375
Fhl2	yellow	yellow	0.13396488021265446	0.10800258821476544	0.2315882295026686	0.099227	0.0200444	-0.147106
Nck2	turquoise	turquoise	0.0688618	0.029085947116639616	0.0808232	0.0814157	-0.00223359	-0.0736032
Tpp2	turquoise	turquoise	0.017147620297291926	-8.59296e-05	-0.00800566	0.011653715566004365	0.017226571662933586	0.00395089
Gulp1	brown	brown	-0.255535	0.11890964387628397	-0.126161	0.00478078	-0.0197707	0.3336348769188952
Dnah7b	brown	brown	-0.11042	0.0518507	-0.0500487	-0.0232664	-0.0259738	0.18090811171893859
Slc39a10	turquoise	turquoise	0.0717088	-0.0356011	-0.00886248	-0.023352	0.0490492	-0.0431089
Tmeff2	turquoise	turquoise	0.22953434341111706	-0.203355	0.00550506	-0.0102343	-0.070198	-0.168954
Gls	turquoise	turquoise	0.10351250744919019	0.012370838189407481	0.0586609	0.0220251	0.00627982	-0.055002
Dnah7a	brown	brown	-0.106007	0.0599358	-0.00927035	-0.0318455	-0.0551413	0.18165181349940182
Hecw2	turquoise	turquoise	0.054878764819588276	0.0293493	0.0275812	0.1402730020433033	-0.0322825	-0.0523228
Sf3b1	turquoise	turquoise	0.0505048	-0.0211642	-0.0131184	0.00212021	0.0421322	-0.0099624
Hspe1	blue	blue	-0.00164868	0.00871316	-0.000298144	7.446657698648164e-4	0.15122946889905428	-6.24669e-05
Plcl1	turquoise	turquoise	0.19669836750266645	-0.0810324	0.023417226714282324	0.14586371848413332	0.00104377	-0.177282
Satb2	green	green	0.032084042498867704	0.12729885871968966	0.019946831745265087	0.6058882451644226	0.019902355406618992	-0.107675
Spats2l	brown	brown	-0.20105	0.0795466	-0.131653	-0.00452816	-0.0228972	0.30047539838205967
Orc2	turquoise	turquoise	0.0193312	0.00916984	0.0053511	0.00957097	-0.0182134	0.018884868976825186
Hycc2	turquoise	turquoise	0.0622328	-0.00779616	0.0326795	-0.0347937	-0.0081023	0.00112178
Bmpr2	turquoise	turquoise	0.028228313397035736	0.0662353	0.0611277	0.030058718322745717	-0.0112388	0.00624954
Abi2	turquoise	turquoise	0.0593889	-0.0267242	-0.0107439	-0.000996706	0.00761118	0.011650901692176419
Raph1	turquoise	turquoise	0.0481358	0.0690347	0.0750167	-0.0177753	-0.0261861	0.021831681241394594
Ino80d	turquoise	turquoise	0.0264695	-0.00117015	0.014259529608696893	-0.0224765	-0.0149509	-0.00169311
Eef1b2	blue	blue	-0.0266402	-0.0271759	-0.0380226	-0.0039136	0.1500783714254645	0.017482611414046785
Adam23	brown	brown	-0.0544747	0.084231	0.03644	0.043972111371032144	-0.0133775	0.0487689
Klf7	turquoise	turquoise	0.0596048	0.0728264	0.11565596984261804	0.0378691	-0.0244077	-0.0624319
Creb1	turquoise	turquoise	0.050852820360749854	-0.017489	0.00209315	-0.0174006	0.016093	0.00357579
Ccnyl1	turquoise	turquoise	0.046386952518915094	-0.0079762	0.00944724	-0.00732784	-0.0100354	-0.0414317
Plekhm3	turquoise	turquoise	0.021265389394971475	-0.0228908	-0.0204224	-0.00446033	-0.0351587	0.00618474
Pikfyve	turquoise	turquoise	0.0364903	0.00424623	0.024515711028310384	0.027669822708077777	0.00597441	-0.0319551
Map2	brown	brown	-0.0564494	-0.0943606	-0.189968	-0.0521165	-0.015315	0.15312329222877297
Unc80	turquoise	turquoise	0.033331	-0.00619294	-0.0465282	-0.00374321	-0.0403088	0.0968769
Kansl1l	turquoise	turquoise	0.0954936	0.0425473	0.0862888	0.014600602199081329	-0.0106567	-0.0286893
Rpl37a	blue	blue	-0.014182	-0.018543	-0.0263115	-0.00964626	0.19946766877233807	0.010741430028170245
Arpc2	turquoise	turquoise	0.0578418	-0.030428	-0.00535986	-0.0129205	0.0488701	-0.0360063
Usp37	turquoise	turquoise	0.013993	0.021593827460440928	0.023510820846236163	-0.00451781	-0.0176595	0.0193515
Ptprn	turquoise	turquoise	0.051881606062429524	0.019216130965998366	0.011074939852382018	9.404439250433565e-4	0.011968669313384306	0.0100692
Speg	turquoise	turquoise	0.1301630715023748	-0.0616893	0.019272407971044788	0.00419055	-0.0105682	-0.0837787
Slc4a3	turquoise	turquoise	0.0681515	-0.00613997	0.0250692	-0.0487444	0.0053552	0.00206814
Sgpp2	brown	brown	-0.147145	0.052067594694893526	-0.0917246	0.0475102	-0.0298462	0.1940138987196828
Scg2	brown	brown	-0.137592	0.0277706	-0.0755232	-0.0211735	0.0570916	0.15313216441058977
Cul3	brown	brown	-0.00234091	0.015834440081734718	-0.00519861	0.025519992157489756	0.013666567113065919	0.031709
Nyap2	turquoise	turquoise	0.062013642358722844	-0.0362369	-0.0153901	-0.0223825	-0.0205481	0.028988146098346976
Trip12	turquoise	turquoise	0.0184948	0.014492129941278986	0.018473320175036407	-0.00281275	-0.0173381	0.023052570103105647
Armc9	turquoise	turquoise	0.0334396	-0.0295681	-0.0143969	-0.0182866	-0.0227926	0.0522624
Dis3l2	brown	brown	-0.0231443	-0.025458	-0.0547573	0.010782040201627794	-0.0265536	0.0709904
Gm28375	turquoise	turquoise	0.00773168	-0.00429899	-0.0251795	0.031158989987528543	0.0388031	0.0305313
Gigyf2	turquoise	turquoise	0.031593557195637174	0.00295987	0.00995991	-0.0201078	-0.0174437	0.029648888184864254
Atg16l1	turquoise	turquoise	0.00896419	-0.00427562	-0.00700463	-0.000204373	0.00163418	0.029090915103795207
Dgkd	turquoise	turquoise	0.10080424401963907	-0.0286037	0.053238205799293226	-0.053398	-0.0262036	-0.0514527
Lrrfip1	turquoise	turquoise	0.16807610696845926	-0.0338392	0.0647626	0.014526114447122429	-0.00594676	-0.102989
Hdac4	turquoise	turquoise	0.0713224	0.0215288	0.0526647	0.0484094	-0.0107817	-0.0508564
Cops9	blue	blue	-0.00507817	-0.0139759	-0.00862332	0.00286206	0.10211455582060973	-0.0056627
Kif1a	brown	brown	-0.0438272	0.0789501	0.00737296	0.047200435253538384	0.00127093	0.0885065
Hdlbp	brown	brown	-0.00566922	0.00748498	-0.013472	-0.0049955	-0.00366173	0.037488925413683816
Relch	turquoise	turquoise	0.032731	-0.0368023	-0.026111	-0.0173474	-0.0210928	4.9151373345324285e-5
Phlpp1	turquoise	turquoise	0.0549204	-0.000601285	0.029627577243367995	-0.02302	-0.0312894	-0.0335421
Bcl2	green	green	-0.0353786	0.0503553	-0.062376	0.29049956279765354	0.028123521600380185	-0.0270711
Cntnap5a	turquoise	turquoise	0.0728504	0.0365544	0.014277767972790812	-0.166728	-0.0575324	0.0785897
Clasp1	brown	brown	-0.0162003	0.011465466494695672	-0.0376695	-0.0147644	-0.0238116	0.0842986
Ptpn4	turquoise	turquoise	0.027407426904069207	-0.016513	-0.039273	0.0471458	-0.0344341	0.00433472
Dbi	blue	blue	0.025596185929943446	-0.0433459	-0.0197694	0.00136399	0.20695802038215394	-0.0399604
Dpp10	green	green	-0.044304	0.4349835334295396	0.27410314286907683	0.45057	-0.0113071	0.049555824369749556
Actr3	turquoise	turquoise	0.051637919543323654	-0.0160831	0.013944290017450135	0.0098432	0.0120943	-0.0347482
Mgat5	turquoise	turquoise	0.058769704047509565	0.026014081871529017	0.0407249	0.026949302669767965	-0.0280719	0.00793977
Ccnt2	turquoise	turquoise	0.043669658220438196	-0.0206966	-0.00778204	-0.0152462	-0.00851057	0.027503935556212326
Rab3gap1	turquoise	turquoise	0.00710142	-0.0205326	-0.0394052	0.00363725	0.0478346	0.0577669
R3hdm1	turquoise	turquoise	0.2807542084760988	-0.163193	-0.0247225	-0.0702504	0.0186913	-0.205566
Ubxn4	turquoise	turquoise	0.016287568284246687	0.022070876918381534	0.024346130988572637	0.00189412	-0.00489136	0.018934339738867826
Thsd7b	green	green	-0.0944938	0.0176181	-0.0818015	0.5109954013305245	0.013595200192040873	-0.00231508
Srgap2	yellow	yellow	-0.0163673	0.1852681296201472	0.12001965148420304	0.14077865599031814	-0.0029412	0.0556642
Mfsd4a	turquoise	turquoise	0.0964964	-0.029766	0.0466301	-0.0183873	-0.0113066	-0.0692458
Lemd1	brown	brown	-0.149348	0.0853891	-0.0509066	-0.0375369	-0.0114628	0.23133419237466463
Nfasc	yellow	yellow	-0.00928512	0.1125952851712063	0.0946477	0.10419911291051966	-0.00927556	0.033792004629420405
Lrrn2	turquoise	turquoise	0.12823669160645823	-0.0246482	0.11086111969123136	-0.0305841	-0.0123019	-0.066951
Plekha6	yellow	yellow	0.016654851604091216	0.14329798160275178	0.17830587243574417	6.21233010332647e-4	-0.0201321	0.026808212627668845
Etnk2	brown	brown	-0.0771519	0.0443192	-0.017306	-0.0358048	-0.0189758	0.14014708260441494
Ppfia4	brown	brown	-0.148494	0.037472	-0.0966326	0.00154953	0.011095926632698419	0.1695792320572615
Kdm5b	turquoise	turquoise	0.0460744	0.00850437	0.039848189960176625	-0.00880871	-0.00554801	-0.0155567
Ppp1r12b	turquoise	turquoise	0.0281564	-0.0283231	-0.0290061	0.00344444	-0.00735536	0.0321011
Nav1	turquoise	turquoise	0.024907770784585326	0.031139062242639824	0.0348388	0.00909064	-0.0210754	0.023272091045491702
Camsap2	turquoise	turquoise	0.00642149	-0.00110836	-0.00958769	-0.0134743	0.00137355	0.0063661
Ptprc	yellow	yellow	0.0780421	0.229482	0.4092838418814519	0.011672233016461727	-0.0359541	-0.13889
Kcnt2	turquoise	turquoise	0.1730995015924939	0.1356277720144701	0.26613224253786644	0.064443	-0.0196765	-0.199754
4930590L20Rik	yellow	yellow	0.14141706306532062	0.12316485648848192	0.23747246658749172	0.050442228017011675	0.0135041	-0.150237
Cdc73	turquoise	turquoise	0.0551063	-0.0122986	0.025336419712890492	0.0375924	-0.0149794	-0.0414927
Tpr	brown	brown	-0.0267809	0.0326778	0.0109055	-0.000547028	0.052226	0.0543131
Swt1	turquoise	turquoise	0.00930809	0.033776017128928804	0.023813648442917917	0.0392775	0.00571507	0.0231295
1700025G04Rik	turquoise	turquoise	0.0601581	-0.0225879	0.024705191250081186	-0.0599776	-0.0245761	-0.0264548
Rgl1	turquoise	turquoise	0.126672	-0.159428	-0.0393714	-0.113285	-0.0377998	0.00511147
Glul	blue	blue	-0.00130423	-0.0180539	-0.0187772	0.00633251	0.093211	-0.00716287
Cacna1e	turquoise	turquoise	0.28470306795967726	-0.137742	0.0894248	-0.0275136	-0.0495572	-0.193531
Cep350	brown	brown	-0.0456127	0.023334650520173816	-0.0291922	0.016716179499474803	-0.00118747	0.0718052
Abl2	turquoise	turquoise	0.13684208242692153	-0.0957386	-0.00715229	-0.0511462	-0.0226442	-0.0719754
Ralgps2	turquoise	turquoise	0.057962496783017646	-0.079376	-0.0354752	0.024503794789974158	0.0459841	-0.0235205
Brinp2	turquoise	turquoise	0.215424	-0.0824534	0.0605581	0.13706016219102485	-0.0176675	-0.215798
Astn1	turquoise	turquoise	0.0889308	-0.0240842	0.019005555734560496	0.00305585	-0.0339636	-0.0102387
Gm37679	turquoise	turquoise	0.14382400433918213	-0.0303316	0.0543778	-0.00743811	0.00302264	-0.0549883
Cop1	brown	brown	-0.00487535	0.00123625	-0.0177059	0.00369878	-0.0117181	0.024595112585240466
Tnr	turquoise	turquoise	0.25018456512777376	-0.0225217	0.12364866479945552	0.0528252	-0.0320029	-0.187176
Rabgap1l	turquoise	turquoise	0.10038782370433437	-0.00229119	0.058052841170144726	-0.0728013	-0.0135689	0.025341740552669616
Gm36975	turquoise	turquoise	0.16086521593584358	0.0520925	0.1396972379658696	-0.0455503	-0.00106807	-0.0246465
Rc3h1	turquoise	turquoise	0.0328811	-0.0248064	-0.00314772	-0.0107494	-0.0228616	-0.00293457
Prrc2c	turquoise	turquoise	0.00678058	-0.0449909	-0.0653319	-0.0534788	-0.00433435	0.0562543
Kifap3	blue	blue	-0.00493801	0.036116636929823503	0.0176614	0.012501969825550258	0.040330164525891374	0.040103
Atp1b1	blue	blue	-0.0510584	-0.0300359	-0.0532659	-0.0203532	0.0777289	0.038298890875582865
Dcaf6	turquoise	turquoise	0.13856461166479664	-0.0698088	0.0337719	-0.0258642	-0.0162796	-0.0803985
Pou2f1	turquoise	turquoise	0.0212639	0.0233409	0.02615	0.011969126198000812	-0.014855	-0.000382816
Ildr2	turquoise	turquoise	0.0994053	-0.15077	-0.0943968	-0.0878477	-0.0151515	-0.0310464
Fam78b	turquoise	turquoise	0.0681696	-0.00416012	0.037669	0.019841711219828882	0.013854949513367626	-0.0609367
Uck2	turquoise	turquoise	0.0516475	0.0340791	0.0587897	0.0337561	-0.00436561	-0.052342
Pbx1	turquoise	turquoise	0.0652142	0.026762380950235767	0.021905802660641023	0.15080221913656644	-0.0788342	-0.0343726
Nos1ap	yellow	yellow	0.14640889764272427	0.1653176419446044	0.28036479103936407	0.18366244386597472	0.012425227420658007	-0.178835
Atf6	turquoise	turquoise	0.037603207386801146	0.023528	0.0395712	-0.00616903	-0.0132033	-0.0140136
Pfdn2	blue	blue	-0.01995	0.011460561915032377	0.00378962	0.00304532	0.10177697434886503	0.010120568896629612
Kcnj9	turquoise	turquoise	0.0692356	-0.0630349	-0.00193559	-0.0323667	-0.00722311	-0.0424338
Fmn2	green	green	-0.036559	0.0832511	0.0199685	0.0817583	-0.0186666	0.0791912
Rgs7	turquoise	turquoise	0.14611375552385442	-0.120396	-0.018179	-0.100282	-0.0573815	-0.0309974
Cep170	brown	brown	-0.0284649	0.014964041835237921	-0.00699643	-0.0218522	0.00572292	0.0476154
Sdccag8	turquoise	turquoise	0.0267178	0.0262936	0.0192577	0.00917486	-0.0119775	0.018875821453665877
Akt3	turquoise	turquoise	0.0737288	0.0673124	0.10743292573598782	-0.0236708	-0.0508317	-0.00394544
Catspere2	yellow	yellow	-0.00267352	0.090834	0.0622192	0.0528744	0.00423433	0.0246768
Desi2	turquoise	turquoise	0.0253261	0.042129148408839946	0.0515421	0.0398263	4.02546700453853e-4	-0.0074293
Hnrnpu	brown	brown	-0.0130064	-0.00390927	-0.0331467	0.016530648721252723	0.00671556	0.0410094
Kif26b	brown	brown	-0.232118	0.18109891822059027	-0.033843	-0.0523933	-0.0381677	0.38854294802995415
Cdc42bpa	brown	brown	-0.0419372	0.0551454	-0.0245061	0.014851671647986479	-0.00689921	0.0897826
Stum	turquoise	turquoise	0.2512529182692674	-0.0262518	0.18906053288862018	-0.0669004	0.0449402	-0.202967
Parp1	turquoise	turquoise	0.058843361982721054	-0.0324767	0.001342	7.153074190726067e-4	-0.00110664	-0.0282933
Wdr26	turquoise	turquoise	0.021712864305820815	-0.0154954	-0.0138804	-0.0132741	-0.00761142	0.001018
Cnih3	yellow	yellow	0.1597911864212588	0.0951062	0.2656387537836029	0.12631263450004568	-0.0169608	-0.188991
Mark1	green	green	-0.00222218	0.00436295	-0.0277764	0.0388866	0.00214336	0.025732917947507185
Rab3gap2	turquoise	turquoise	0.0365772	-0.0280868	-0.0184238	-0.0133485	0.017230573413797183	-0.000385048
Slc30a10	brown	brown	-0.0700003	0.021035972279670318	-0.0354357	-0.0250307	0.00385553	0.12966682252248032
Gpatch2	turquoise	turquoise	5.829967230835823e-4	0.0119188	0.00411599	0.0261286	-0.0362587	0.014588279616614186
Rps6kc1	brown	brown	-0.0178791	0.027202505865848086	-0.005865	0.0044019	-0.0351196	0.0651755
Nenf	blue	blue	-0.000686125	-0.000881417	-0.00133043	-0.00152557	0.10064605650666994	0.00520284
Ppp2r5a	turquoise	turquoise	0.0640858	-0.0151714	0.0151015	0.05258	0.0174134	-0.0891554
Lpgat1	turquoise	turquoise	0.036112257872792715	-0.0391331	-0.0267702	5.29190424864202e-4	-0.0171395	-0.0102263
Rcor3	turquoise	turquoise	0.0506499	0.0182921	0.0676503	0.00301748	-0.0100016	-0.0464141
Syt14	turquoise	turquoise	0.0863853	-0.155956	-0.0496537	-0.124474	-0.0148072	-0.0133532
Plxna2	turquoise	turquoise	0.11957035464347045	0.020509	0.0870502	0.0860992	-0.0229324	-0.128889
A330023F24Rik	brown	brown	-0.0130838	0.00887128	-0.0324331	0.015368735182606364	-0.0224943	0.10455149349802509
Gm32250	turquoise	turquoise	0.0803974	-0.0302868	0.0038295	-0.0196663	0.0508944	0.0579706
Cd46	turquoise	turquoise	0.058072949644831194	0.00734919	0.050363088598830305	-0.00187537	-0.0159557	0.00100069
Fam171a1	turquoise	turquoise	0.0726433	-0.0602289	-0.0272411	-0.0152109	-0.0012617	-0.0578174
Nmt2	turquoise	turquoise	0.10366563803551584	0.0301776	0.0584876	0.0844169	0.00227782	-0.085559
Dclre1c	turquoise	turquoise	0.0931206	0.00317045	0.0749911	0.021140600430763008	-0.00254406	-0.0755225
Frmd4a	brown	brown	-0.0828896	0.084396	-0.0165325	0.14271702768192243	-0.091631	0.17449007116787152
Prpf18	turquoise	turquoise	0.030833103268275104	8.373647768323275e-4	0.0143307	0.011179341521657563	0.00864086	-0.00378343
Camk1d	turquoise	turquoise	0.15303564941443484	-0.070235	0.0552935	-0.14589	0.0883493	-0.0315387
Nudt5	turquoise	turquoise	0.0686526	0.0083496	0.0493498	-0.0266874	-0.00229324	0.0080527
Sec61a2	turquoise	turquoise	0.0834223	0.0057483	0.060271758580821774	-0.0142418	-0.0193558	-0.030353
Upf2	turquoise	turquoise	0.0648302	0.00687619	0.028916762849692145	-0.0144088	0.0306334	0.0158198
Celf2	turquoise	turquoise	0.5689341921074436	-0.20598	0.20206018556379068	0.013105641058901676	-0.0642117	-0.525708
Gm13389	turquoise	turquoise	0.0978464	-0.0264701	0.044204382099934034	-0.0303909	0.00690937	-0.076371
Gm10115	turquoise	turquoise	0.2848259626059164	-0.132408	0.0716607	-0.0514073	-0.0135229	-0.264291
Taf3	turquoise	turquoise	0.00469244	0.0125213	0.015627	-0.0165783	-0.0195555	0.0346496
Mindy3	turquoise	turquoise	0.0671828	-0.043598	0.0115033	-0.0151705	-0.020006	-0.0592337
Pter	yellow	yellow	0.0842989	0.0790519	0.18024390833350615	-0.00574394	0.010878087805162924	-0.079654
C1ql3	yellow	yellow	0.1594498663664661	0.206472	0.4205329671470532	-0.0171796	0.0375038	-0.181412
Rsu1	yellow	yellow	0.0746964	0.13446742150712346	0.20903547846744067	0.0402535	-0.0245685	-0.0744603
Plxdc2	turquoise	turquoise	0.0850973	-0.0764081	0.0361766	-0.138337	-0.026931	-0.0231893
Mllt10	turquoise	turquoise	0.0461688	-0.0150103	0.00571966	0.020049314400232807	-0.0361875	0.0206723
Dnajc1	turquoise	turquoise	0.2049387971549006	-0.0417264	0.10914020409466181	-0.0103848	0.013426090236593927	-0.167855
Pip4k2a	turquoise	turquoise	0.0681305	-0.0196239	0.0214303	0.023309282217088605	0.00680467	-0.0536734
Etl4	green	green	-0.101974	0.46189013212136076	0.28801354786486194	0.5268165405186497	-0.000365049	-0.00686791
Gm17171	green	green	-0.0248814	0.28158039831211606	0.21371255822025792	0.42211767325803645	0.00229243	-0.0468851
Arhgap21	turquoise	turquoise	0.0964438	-0.097334	-0.0415413	0.027448404101375293	0.0244923	-0.0782463
Gpr158	turquoise	turquoise	0.0591936	-0.0827305	-0.0615081	-0.0763511	-0.0352103	0.021972241431085802
Abi1	turquoise	turquoise	0.10542547244570023	-0.0859228	-0.00252217	-0.0552304	-0.0158566	-0.0480799
Yme1l1	turquoise	turquoise	0.022776576903790004	-0.00627834	0.00604978	-0.00337662	-0.0128596	0.0112361
Cacna1b	turquoise	turquoise	0.0563403	0.0405682	0.0666055	0.014428554002900365	0.00518204	0.0191137
Ehmt1	turquoise	turquoise	0.0453816	0.0135863	0.035013051113649406	0.023400731601914398	-0.00658377	-0.00276773
Grin1	turquoise	turquoise	0.10371094590341919	-0.00974356	0.045786707704435915	0.010421441319762694	0.00731536	-0.009133
Phpt1	blue	blue	0.00546793	-0.040428	-0.027822	-0.0154918	0.0767127	-0.0118087
Rabl6	turquoise	turquoise	0.043204047863748346	-0.00998034	0.0044184	0.00731343	-0.00475986	0.018962117113423008
Bmyc	blue	blue	-0.0108193	0.0163578	0.00817839	0.028794682176791465	0.111249	0.00473046
Rpl7a	blue	blue	0.00598178	0.00518432	0.00769906	0.01058	0.1178638550568019	-0.0131966
Rexo4	turquoise	turquoise	0.0130575	0.017060175204845356	0.0173134	0.015583148058374175	-0.00609539	0.0318101
Olfm1	turquoise	turquoise	0.23152091182578724	-0.171482	0.012074370662266036	-0.076748	0.14632159664015562	-0.193978
Med27	turquoise	turquoise	0.0405107	-0.0235602	0.00661198	-0.0110896	-0.00998838	-0.0119336
Rapgef1	turquoise	turquoise	0.0252769	-0.0185725	-0.0026801	-0.00334522	-0.0472083	0.011176281008004477
Odf2	turquoise	turquoise	0.0547007	7.418584564391429e-5	0.0406544	0.00171575	-0.011685	0.013549575542510134
Sptan1	turquoise	turquoise	0.1304255964492705	-0.0995287	0.00235234	-0.039903	-0.0212596	-0.0531343
Zer1	turquoise	turquoise	0.027568047932644335	0.057542466281412574	0.0569728	0.0358953	-0.00196548	0.0041407
Phyhd1	turquoise	turquoise	0.0956674	0.0634355	0.11993020158717711	0.0402926	-0.0127495	-0.0759017
Sh3glb2	turquoise	turquoise	0.0840639	-0.0268729	0.017987661151063306	-0.00934808	0.022368650658676766	-0.0399877
Ncs1	turquoise	turquoise	0.029066834865246895	-0.0037153	0.022496888722866835	0.00263123	0.017082917286622413	-0.0326717
Gm13427	brown	brown	-0.0614425	0.0435609	-0.0145927	0.00998145	-0.00928854	0.11507291578586464
Prrc2b	turquoise	turquoise	0.042618540166948465	0.020285	0.028401063498423692	0.029261	0.0185172	0.00574553
Dnm1	turquoise	turquoise	0.0773676	-0.0506834	0.012010119908751083	-0.0194705	0.035543520830592805	-0.0349704
Bbln	blue	blue	0.028484861712944107	-0.00948961	0.013336832801672865	0.00584732	0.0976226	-0.0324005
Slc25a25	turquoise	turquoise	0.0470427	-0.0388456	-0.0302716	-0.00547447	-0.000306753	-0.0283048
Stxbp1	turquoise	turquoise	0.021618082002020728	0.029180633815964214	0.018234811506906434	-0.00528819	0.013515085449176616	0.0107004
Rpl12	blue	blue	0.00362607	0.00836254	0.017435635039596158	-0.00621609	0.1584500943823406	-0.00898432
Garnl3	yellow	yellow	0.11012124462294759	0.2769573412029977	0.39974253750004285	0.16614600830062237	-0.0258987	-0.134346
Ralgps1	turquoise	turquoise	0.036606973906762104	0.014253925920132329	0.016026116958471958	-0.0177696	-0.0275435	0.0403276
Mapkap1	brown	brown	-0.00567913	0.00351904	-0.0156918	4.976488683340628e-4	-0.00975386	0.048068
Gapvd1	green	green	-0.000967675	0.0429739	0.0133993	0.0576529	-0.019528	0.027015360268508863
Ttll11	turquoise	turquoise	0.021550856298834114	0.026455697246303082	0.0372135	-0.0163288	-0.0403171	0.0380365
Ndufa8	blue	blue	-0.0106357	-0.0186875	-0.019896	-0.0201027	0.12518731869729063	0.017607475669827066
Rc3h2	turquoise	turquoise	0.0200926	-0.0185083	-0.0081188	-0.0106574	-0.0138538	0.013860328164530226
Rabgap1	turquoise	turquoise	0.0241879	0.011825605468672134	0.00368432	0.035929	-0.0475053	0.018789335118145845
Strbp	turquoise	turquoise	0.074048	0.1356356515544758	0.12064460330170912	0.096678	-0.00384128	-0.0283316
Dennd1a	turquoise	turquoise	0.10455169184882894	-0.0514299	0.026387489448765532	-0.0393751	-0.0372203	-0.0199185
Nr6a1	turquoise	turquoise	0.033846908128037895	0.0655992	0.0571695	-0.00914644	-0.0204806	0.00155876
Nr6a1os	turquoise	turquoise	0.0307115	0.057821174310126754	0.0557614	-0.00615365	0.00838729	-0.000901757
Golga1	turquoise	turquoise	0.024094809145771615	-0.0029191	-0.00332514	0.013771622514301047	-0.00989574	0.00503825
Scai	green	green	-0.0564879	0.12224853730586102	0.0537626	0.13004712539834876	-0.0316791	0.0757936
Arhgap15	turquoise	turquoise	0.19419649478099527	0.0349226	0.1967691147088447	-0.0614758	0.00497788	-0.175038
Gtdc1	turquoise	turquoise	0.14984100732939792	0.015895587713084115	0.12740449009723628	0.0384638	-0.0338394	-0.120977
Zeb2	yellow	yellow	0.3338639822654434	0.13553478441939645	0.4383230203428207	0.012656645767320647	0.00345806	-0.362792
Orc4	turquoise	turquoise	0.0447176	-0.0701577	-0.0507337	0.0271241	0.018957653385721328	-0.013223
Mbd5	turquoise	turquoise	0.0391326	-0.000164988	0.0064388	0.023999449700967117	-0.0398162	0.0229975
Kif5c	turquoise	turquoise	0.0469376	-0.0156004	0.00529456	-0.0195558	0.0382819	0.0174728
Lypd6b	green	green	-0.0758757	0.048773600264204575	-0.0524256	0.4207333316641988	-0.00601631	-0.005166
Cacnb4	turquoise	turquoise	0.15551956386885696	0.036881362170257684	0.1174912891859178	0.029657205171091397	0.0089581	-0.105799
Stam2	turquoise	turquoise	0.0971387	-0.0305215	0.026064800705020236	0.00988394	0.073302	-0.0486989
Fmnl2	turquoise	turquoise	0.13998791181128836	-0.0730694	0.0419906	3.385276096630178e-4	-0.0221697	-0.0786379
Prpf40a	brown	brown	-0.00473273	-0.0184719	-0.032138	-0.00778311	-0.00402723	0.030388405858669826
Kcnj3	turquoise	turquoise	0.0630854	-0.183383	-0.116632	0.00718667	-0.015189	0.00640097
Acvr1	turquoise	turquoise	0.1107866544946885	-0.0785388	0.019002465883125423	-0.0589075	-0.0110532	-0.0707474
Upp2	turquoise	turquoise	0.018123936306570127	-0.0240912	-0.0212113	-0.0348857	-0.0425446	0.0533835
Ccdc148	brown	brown	-0.00295983	-0.0262026	-0.00684251	-0.0410808	-0.0247974	0.0695946
Pkp4	green	green	-0.003315	-0.011296	-0.0296569	0.0714679	-0.0456451	0.0303898
Psmd14	turquoise	turquoise	0.011606129832640236	-0.0213544	-0.0332412	0.0297528	0.0310075	0.00741051
Slc4a10	turquoise	turquoise	0.161534	-0.0765366	0.0324902	0.0786703	0.00694762	-0.106856
Scn2a	turquoise	turquoise	0.00852982	-0.0280946	-0.0367444	0.00141694	-0.00227551	0.033478108323935725
Csrnp3	brown	brown	-0.0254503	-0.0588664	-0.0920698	0.00726485	0.00217223	0.0609747
Gm13629	brown	brown	-0.196076	0.0629614	-0.101624	-0.0566515	-0.0385654	0.3136620050393389
Scn9a	brown	brown	-0.215888	0.0598806	-0.115491	-0.0712439	-0.0240432	0.32934746320094777
B3galt1	turquoise	turquoise	0.20345109024282723	-0.0475614	0.0807005	0.12424311308369887	-0.0136777	-0.189073
Stk39	turquoise	turquoise	0.1357858928917222	0.021781914080987463	0.0876602	0.0394663	-0.0348697	-0.099965
Cers6	turquoise	turquoise	0.10091083352416302	-0.125142	-0.0596475	0.020217661594485754	0.0117884	-0.0700794
Ppig	brown	brown	-0.0153661	-0.0322427	-0.0632182	-0.0180511	-0.012129	0.048689212735923026
Ubr3	turquoise	turquoise	0.043497051813386964	-0.0580419	-0.0525716	-0.00541108	-0.0403984	0.00329507
Dync1i2	turquoise	turquoise	0.10160707367391705	-0.0405174	0.00624116	-0.0172826	0.0418059	-0.00459017
Slc25a12	brown	brown	-0.00635293	0.029240215796725387	0.029800657300251984	-0.0307527	-0.0238256	0.0597415
Pdk1	turquoise	turquoise	0.16687480545893132	-0.111292	0.039444642427093814	-0.0927973	0.025791255383719666	-0.119527
Rapgef4	turquoise	turquoise	0.22521087963403374	-0.162298	0.0404806	-0.232762	-0.0537879	-0.0797658
Rapgef4os1	turquoise	turquoise	0.1471248982029174	-0.0979281	0.040454413366579366	-0.144096	-0.0123343	-0.0485052
Ola1	turquoise	turquoise	0.051973004685345485	-0.0108337	0.0279667	0.018578001315083633	0.014270725077907592	-0.0271214
Chn1	turquoise	turquoise	0.2379195401060971	-0.113762	0.0413556	-0.0562142	0.033150803035923077	-0.15478
Atf2	turquoise	turquoise	0.0314866	-0.0170656	-0.0203061	0.026698334708185726	-0.00258536	0.012477727555938475
Atp5g3	blue	blue	-0.0188173	-0.00415906	-0.0169922	-0.0124227	0.168739	0.011753547333474858
2600014E21Rik	yellow	yellow	0.11240589358683242	0.0950766	0.22493784321520205	-0.0368395	0.00269043	-0.118246
Pde1a	yellow	yellow	0.2787895070070751	0.0788656	0.3293027741097878	0.26601189508053213	-0.0412253	-0.320773
Nckap1	turquoise	turquoise	0.057396057815817594	-0.0459045	-0.0153277	0.00560975	0.0358082	-0.0268945
Zfp804a	brown	brown	-0.265617	-0.000134429	-0.227882	-0.0345968	0.00645087	0.3713174224007863
Fam171b	turquoise	turquoise	0.0748373	-0.0467326	0.00621502	-0.00211093	0.021945025217176457	-0.0261577
Ctnnd1	turquoise	turquoise	0.13671704320958092	0.00508064	0.067789	0.00391139	0.0118919	-0.110225
Ptprj	turquoise	turquoise	0.1572375957481797	0.0839882	0.17195669904829164	-0.0360621	-0.0273608	-0.111636
Celf1	turquoise	turquoise	0.15750689350651564	-0.0940166	-0.00583611	0.010346078341788025	4.607535249466953e-4	-0.116041
Madd	turquoise	turquoise	0.0807602	-0.0169135	0.0337079	-0.0216068	-0.00380351	-0.0427025
Cstpp1	turquoise	turquoise	0.031015136455204897	0.00339321	0.018494113200474838	-0.00954135	-0.0235582	0.045077579116209375
Ckap5	turquoise	turquoise	0.029844357226731642	-0.00928052	0.00107732	-0.00956669	-0.00885532	0.0232373
Ambra1	turquoise	turquoise	0.0576564	-0.0241848	0.012434725544284956	-0.0199085	-0.0568499	0.00539954
Dgkz	yellow	yellow	0.14422572408290454	0.12744499598672562	0.2183940042832394	0.037066799499507246	0.0311279	-0.132222
Phf21a	turquoise	turquoise	0.1315294007725038	-0.0397088	0.0740447	-0.0178044	-0.0151966	-0.062907
Cry2	turquoise	turquoise	0.11919159377446951	-0.0475044	0.0332249	-0.0213802	0.00201183	-0.087512
Syt13	turquoise	turquoise	0.0474554	-0.0271867	0.00604416	0.00783805	0.0207061	-0.0259855
Ext2	yellow	yellow	-0.00738576	0.040117	0.0331202	0.010457285017123518	-0.00593566	0.021610664733828805
Ttc17	brown	brown	-0.00636294	-0.0088353	-0.028852	-6.18831e-05	-0.0118098	0.0460427
Lrrc4c	yellow	yellow	0.11109773317606991	0.0725197	0.2734585747241205	-0.250317	-0.0687422	0.00820944
4930445B16Rik	yellow	yellow	0.10538299226618693	0.11871110651155443	0.2877849058591768	-0.109808	-0.0127004	-0.041316
Trim44	brown	brown	-0.0249055	0.00334267	-0.0357759	0.0126207	0.022025105363777064	0.074521
Slc1a2	green	green	0.0467066	0.13489538652663888	0.10895985605046449	0.30525944835751284	0.0749658	-0.117529
Caprin1	turquoise	turquoise	0.0164227	-0.00332365	-0.00271041	-0.00640588	0.0264524	0.014643201942503056
D430041D05Rik	green	green	-0.0197239	0.1553364669866189	0.10098984722504577	0.10820327312393586	-0.0519508	0.0891733
Cstf3	turquoise	turquoise	0.0368993	-0.00508535	0.00344288	0.014715736609969417	-0.0110121	0.00696264
Elp4	turquoise	turquoise	0.025375345158292654	-0.0207673	-0.0118273	0.00128486	-0.0340637	0.0182269
[truncated: 2,454 more rows]

## Sheet: Table_S12_gaba_ME_gene_assign
gene_name	module	color	kME_yellow	kME_grey	kME_blue	kME_turquoise	kME_green	kME_brown	kME_red	kME_black
[truncated: 2,081 more rows]

[truncated: 1 more sheets: Table_S13_hdWGCNA_GO_enrich]
